# Supplementary material for: Prognostic role of long non-coding RNA USP30-AS1 in ovarian cancer: insights into immune cell infiltration in the tumor microenvironment
Source: publisher site journal article supplement (doi:10.18632/aging.205262), 2023-12-04
Supplement: Supplementary file [file aging-v15i23-205262-supplementary-material-SD1.pdf]

SUPPLEMENTARY FIGURES

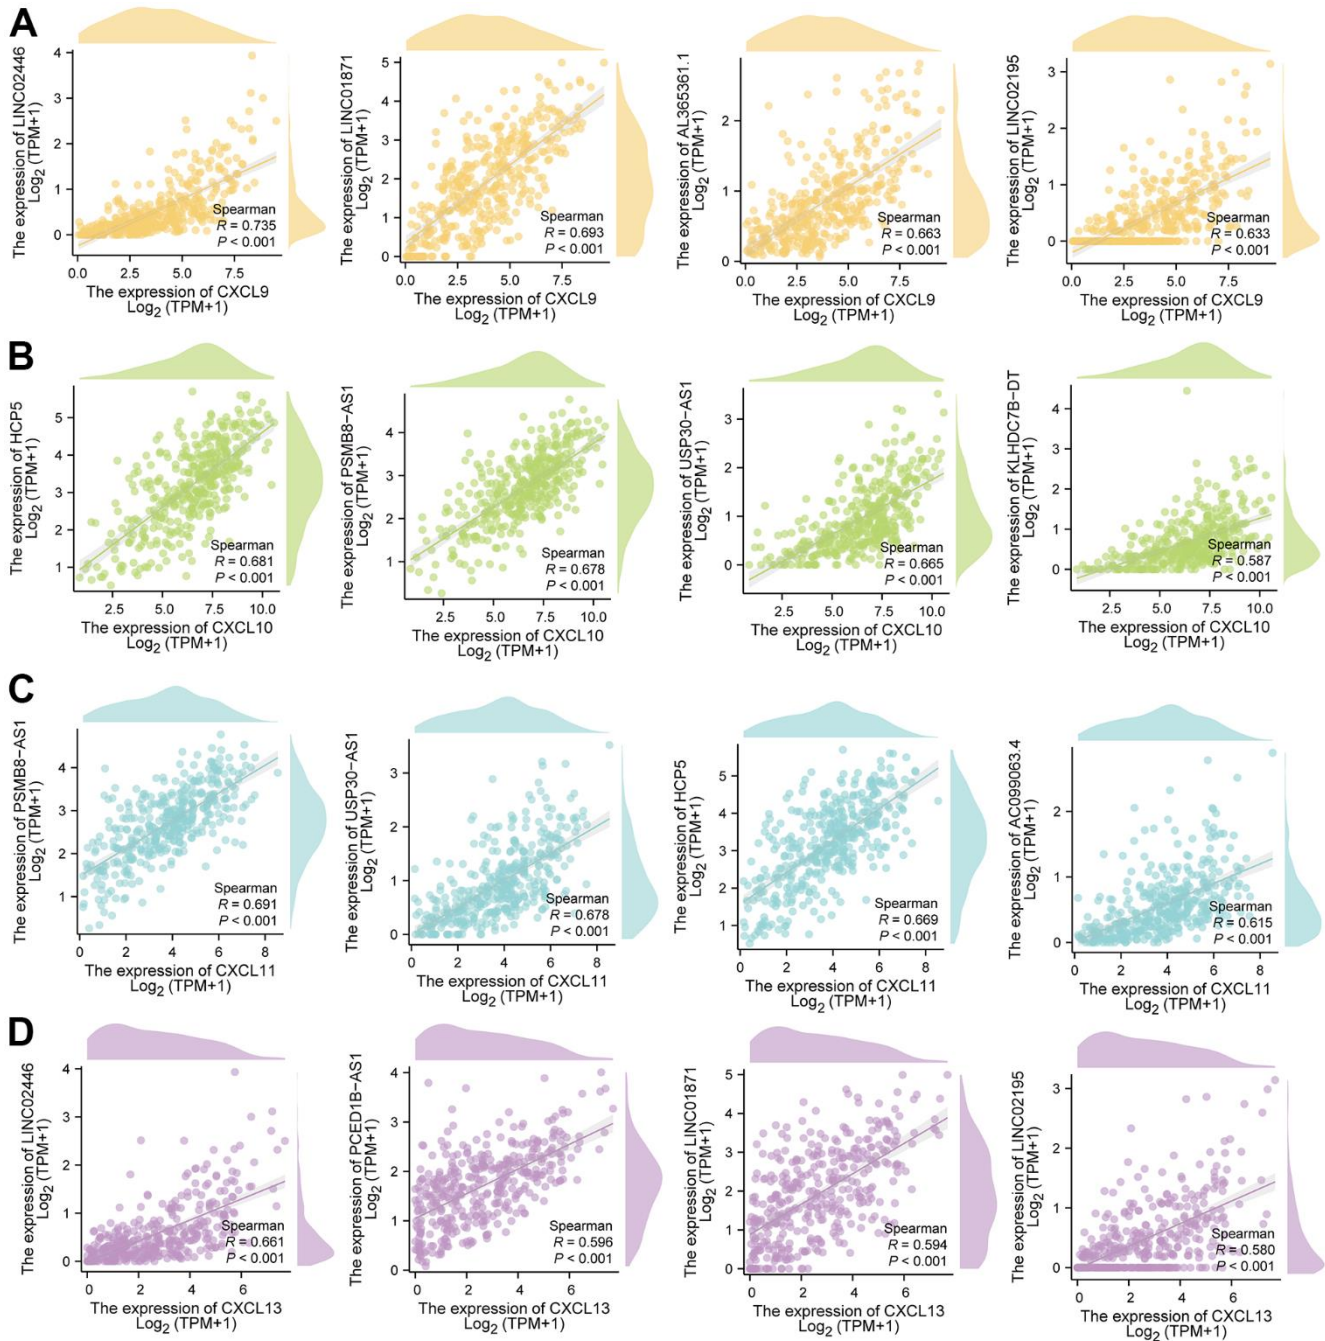

**Supplementary Figure 1. Correlation scatter plots of CXCL9, CXCL10, CXCL11 and CXCL13 with the four lncRNAs with the highest correlation degree, respectively. (A) Correlation scatter plot of CXCL9 and the 4 lncRNAs with the highest correlation degree. (B) Correlation scatter plot of CXCL10 and the 4 lncRNAs with the highest correlation degree. (C) Correlation scatter plot of CXCL11 and the 4 lncRNAs with the highest correlation degree. (D) Correlation scatter plot of CXCL13 and the 4 lncRNAs with the highest correlation degree.**

**A**

|            | pvalue | Hazard ratio       |
|------------|--------|--------------------|
| PSMB8-AS1  | 0.010  | 0.906(0.841-0.976) |
| HCP5       | 0.028  | 0.957(0.920-0.995) |
| DTNB-AS1   | 0.005  | 0.558(0.371-0.838) |
| AC002511.2 | 0.038  | 1.089(1.005-1.181) |
| TRBV11-2   | 0.027  | 0.757(0.592-0.968) |
| AP002954.1 | 0.045  | 0.718(0.519-0.993) |
| AL353699.1 | 0.026  | 1.125(1.014-1.247) |
| USP30-AS1  | 0.032  | 0.739(0.560-0.975) |
| AC012236.1 | 0.004  | 0.733(0.593-0.905) |
| AL365361.1 | 0.016  | 0.671(0.486-0.928) |
| LINC01943  | 0.031  | 0.681(0.480-0.966) |
| AL078582.1 | 0.041  | 1.414(1.014-1.971) |
| MICB-DT    | 0.006  | 0.815(0.704-0.944) |

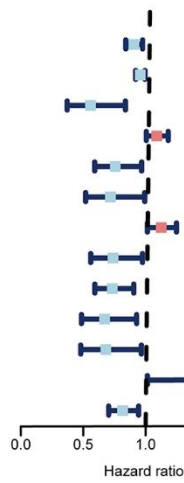

**B**

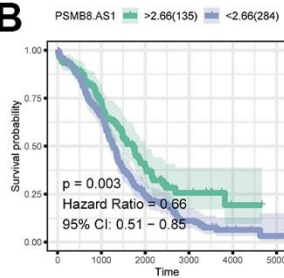

**C**

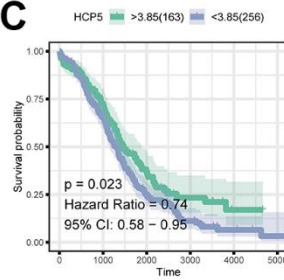

**D**

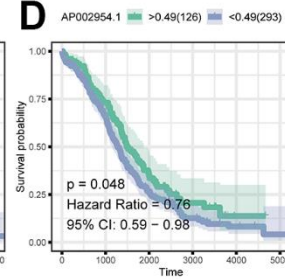

**E**

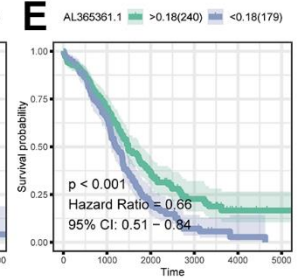

**F**

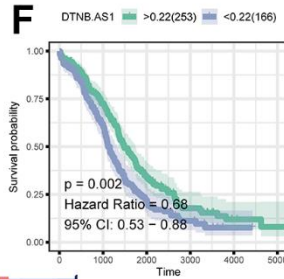

**G**

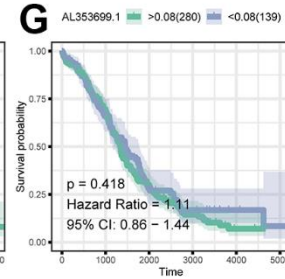

**H**

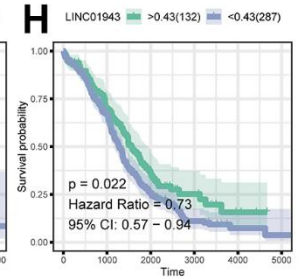

**I**

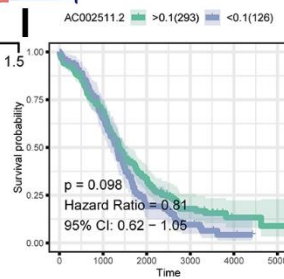

**J**

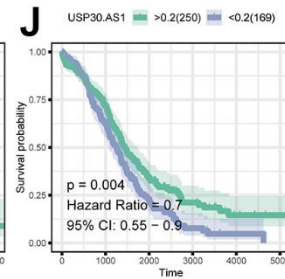

**K**

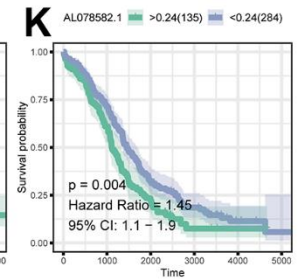

**L**

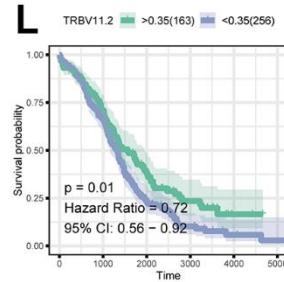

**M**

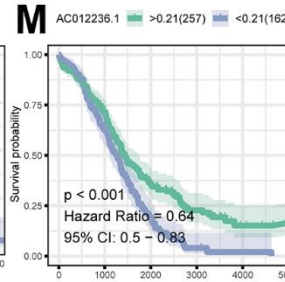

**N**

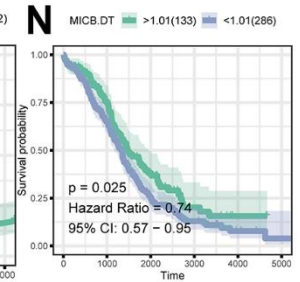

**Supplementary Figure 2. Forest plot and survival curve of 13 lncRNAs.** (A) Forest plot of 13 lncRNAs. (B) Survival curve of PSMB8-AS1. (C) Survival curve of HCP5. (D) Survival curve of AP002954.1. (E) Survival curve of AL365361.1. (F) Survival curve of DTNB-AS1. (G) Survival curve of AL353699.1. (H) Survival curve of LINC01943. (I) Survival curve of AC002511.2. (J) Survival curve of USP30AS1. (K) Survival curve of AL078582.1. (L) Survival curve of TRBV11.2. (M) Survival curve of AC012236.1. (N) Survival curve of MICB.DT.
