# Supplementary material for: Prognostic role of long non-coding RNA USP30-AS1 in ovarian cancer: insights into immune cell infiltration in the tumor microenvironment
Source: publisher site journal article supplement (doi:10.18632/aging.205262), 2023-12-04
Supplement: Supplementary file [file aging-v15i23-205262-supplementary-material-SD2.pdf]

## SUPPLEMENTARY TABLES

**Supplementary Table 1. List of TLS related genes.**

---

CETP  
CCR7  
SELL  
CD79B  
CCL19  
CXCL13  
LAMP3  
CXCL9  
CXCL11  
CCL8  
CCL18  
CCL5  
CXCL10  
RBP5  
CCL21  
SKAP1  
CD1D  
CCL2  
PTGDS  
CCL4  
CCL3

---
