# Supplementary material for: Prognostic role of long non-coding RNA USP30-AS1 in ovarian cancer: insights into immune cell infiltration in the tumor microenvironment
Source: publisher site journal article supplement (doi:10.18632/aging.205262), 2023-12-04
Supplement: Supplementary file [file aging-v15i23-205262-supplementary-material-SD4.pdf]

**Supplementary Table 3. LASSO analysis of the obtained genes and corresponding coefficients.**

| <b>Variable</b> | <b>lambda.min</b> |
|-----------------|-------------------|
| PSMB8-AS1       | -0.024854969      |
| LINC01857       | -0.007698824      |
| DTNB-AS1        | -0.247195127      |
| AC002511.2      | 0.036814435       |
| TRBV11-2        | -0.015803963      |
| LINC01094       | 0.177261565       |
| AP002954.1      | -0.107738165      |
| AL353699.1      | 0.03021951        |
| USP30-AS1       | -0.013455828      |
| AC012236.1      | -0.082114301      |
| AL365361.1      | -0.002645583      |
| AC012181.1      | 0.016359778       |
| LINC01943       | -0.104857848      |
| AL078582.1      | 0.212567266       |
| MICB-DT         | -0.110934382      |
