# Supplementary material for: Prognostic role of long non-coding RNA USP30-AS1 in ovarian cancer: insights into immune cell infiltration in the tumor microenvironment
Source: Aging (Albany NY). 2023 Dec 4;15(23):13776–98. doi: 10.18632/aging.205262 (PMC10756134; doi:10.18632/aging.205262)
Supplement: Supplementary Table 2 [file aging-15-205262-s003.xlsx]

## Sheet: Supplementary File 2
Supplementary Table 2. Analysis results of differentially expressed genes between two clusters.
	logFC	AveExpr	t	P.Value	adj.P.Val	B
PLA2G2D|protein_coding	0.907789	0.553861	11.0796	3.51e-25	6.84e-21	46.0017
CXCL9|protein_coding	2.04535	2.7042	10.2474	3.97e-22	3.87e-18	39.225
SLAMF7|protein_coding	1.07787	1.20706	9.73355	2.6e-20	1.69e-16	35.1958
LAX1|protein_coding	0.480371	0.374263	9.27276	9.89e-19	4.82e-15	31.6923
EOMES|protein_coding	0.35313	0.383627	8.80408	3.56e-17	1.21e-13	28.2429
IRF4|protein_coding	0.5915	0.461164	8.7978	3.73e-17	1.21e-13	28.1975
SLAMF6|protein_coding	0.607977	0.768319	8.59851	1.65e-16	4.59e-13	26.7681
CD79A|protein_coding	1.44937	1.64746	8.57217	2e-16	4.71e-13	26.5809
FCRL5|protein_coding	0.296343	0.167429	8.56112	2.17e-16	4.71e-13	26.5025
IGLL5|protein_coding	0.761245	0.505302	8.45312	4.81e-16	9.36e-13	25.7396
P2RY8|protein_coding	0.38386	0.548143	8.37641	8.41e-16	1.49e-12	25.2019
CCL18|protein_coding	1.22485	1.22873	8.10314	5.99e-15	9.73e-12	23.3145
LY9|protein_coding	0.167177	0.176909	8.06365	7.93e-15	1.18e-11	23.0455
MZB1|protein_coding	1.28855	1.44983	8.05443	8.47e-15	1.18e-11	22.9828
PRDM1|protein_coding	0.564544	1.44997	7.98099	1.42e-14	1.85e-11	22.4855
KCNA3|protein_coding	0.277922	0.278724	7.92875	2.05e-14	2.5e-11	22.1338
P2RX1|protein_coding	0.331655	0.309735	7.90181	2.47e-14	2.83e-11	21.953
CD27|protein_coding	0.634477	1.12893	7.80014	5.01e-14	5.42e-11	21.275
CCR4|protein_coding	0.256789	0.308948	7.74261	7.46e-14	7.54e-11	20.8942
SLAMF1|protein_coding	0.270754	0.309335	7.73704	7.75e-14	7.54e-11	20.8574
CXCL13|protein_coding	1.28234	1.68034	7.69602	1.03e-13	9.52e-11	20.5873
GZMK|protein_coding	0.401987	0.439649	7.68451	1.11e-13	9.83e-11	20.5117
P2RY10|protein_coding	0.355389	0.424528	7.67483	1.19e-13	1e-10	20.4482
AMPD1|protein_coding	0.110552	0.0704668	7.60643	1.89e-13	1.53e-10	20.0012
TNFRSF13B|protein_coding	0.088138	0.0556881	7.48404	4.32e-13	3.37e-10	19.2087
ITK|protein_coding	0.231491	0.280785	7.45647	5.2e-13	3.89e-10	19.0315
SH2D1A|protein_coding	0.308067	0.368211	7.40506	7.32e-13	5.28e-10	18.7025
LYZ|protein_coding	1.52094	3.80888	7.38732	8.24e-13	5.73e-10	18.5893
CXCR6|protein_coding	0.47623	0.690862	7.31364	1.34e-12	9.02e-10	18.1216
CCR2|protein_coding	0.43767	0.482071	7.2696	1.79e-12	1.16e-09	17.8438
BCL11B|protein_coding	0.22258	0.286934	7.19238	2.97e-12	1.87e-09	17.3598
IL21|protein_coding	0.0649375	0.0352406	7.15631	3.76e-12	2.29e-09	17.1351
TMEM200A|protein_coding	0.452726	0.853785	7.15132	3.88e-12	2.29e-09	17.104
IL21R|protein_coding	0.36301	0.461087	7.10417	5.27e-12	3.02e-09	16.8118
ZAP70|protein_coding	0.347669	0.570457	7.08211	6.08e-12	3.38e-09	16.6755
ICAM3|protein_coding	0.20005	0.239679	7.06816	6.65e-12	3.6e-09	16.5896
ISG15|protein_coding	-1.34589	7.05791	-7.05056	7.44e-12	3.92e-09	16.4813
FCRLA|protein_coding	0.175275	0.146166	7.03033	8.47e-12	4.34e-09	16.3571
IFI44|protein_coding	-1.00132	4.43178	-7.02399	8.83e-12	4.41e-09	16.3182
TNFRSF17|protein_coding	0.549498	0.513927	7.01655	9.26e-12	4.51e-09	16.2726
CD3E|protein_coding	0.877531	1.77617	7.00091	1.02e-11	4.86e-09	16.177
CD3G|protein_coding	0.406922	0.60182	6.96203	1.31e-11	6.06e-09	15.9398
CD8A|protein_coding	0.768251	1.46936	6.95884	1.34e-11	6.06e-09	15.9204
POU2AF1|protein_coding	0.53355	0.658768	6.95312	1.39e-11	6.14e-09	15.8856
ABCD2|protein_coding	0.0535715	0.0643229	6.86085	2.49e-11	1.08e-08	15.3275
LCK|protein_coding	0.529427	1.20818	6.85613	2.56e-11	1.08e-08	15.2992
CD2|protein_coding	0.936906	1.98693	6.85055	2.65e-11	1.09e-08	15.2657
JCHAIN|protein_coding	1.86253	3.41104	6.84581	2.73e-11	1.09e-08	15.2372
SIT1|protein_coding	0.647468	1.21298	6.84551	2.74e-11	1.09e-08	15.2354
MS4A1|protein_coding	0.257791	0.169334	6.83779	2.87e-11	1.12e-08	15.189
JAML|protein_coding	0.316099	0.480272	6.82847	3.05e-11	1.16e-08	15.1331
IFI44L|protein_coding	-1.00738	3.11085	-6.72222	5.9e-11	2.21e-08	14.5003
UTS2R|protein_coding	0.129558	0.0840001	6.71556	6.15e-11	2.26e-08	14.4609
CYTIP|protein_coding	0.513836	1.20417	6.69517	6.98e-11	2.52e-08	14.3404
F2R|protein_coding	0.738331	2.85159	6.68371	7.49e-11	2.65e-08	14.2729
CMPK2|protein_coding	-0.828681	2.60917	-6.67327	7.99e-11	2.78e-08	14.2114
IFIT1|protein_coding	-1.12021	3.99403	-6.65552	8.91e-11	3.04e-08	14.107
GPR171|protein_coding	0.378696	0.539256	6.59344	1.3e-10	4.38e-08	13.7438
THEMIS|protein_coding	0.199016	0.238604	6.57582	1.45e-10	4.79e-08	13.6413
CXCR3|protein_coding	0.65982	1.25749	6.5725	1.48e-10	4.81e-08	13.622
CST7|protein_coding	0.944898	2.60297	6.54357	1.77e-10	5.64e-08	13.4541
S1PR4|protein_coding	0.423098	0.891094	6.51802	2.06e-10	6.47e-08	13.3064
CSF2RB|protein_coding	0.516121	1.07581	6.51135	2.15e-10	6.63e-08	13.2679
SLAMF8|protein_coding	0.526596	0.850784	6.47867	2.61e-10	7.93e-08	13.0797
FCRL3|protein_coding	0.0955355	0.104619	6.47654	2.65e-10	7.93e-08	13.0675
MX1|protein_coding	-1.07711	3.99934	-6.47325	2.7e-10	7.97e-08	13.0486
IFNG|protein_coding	0.236514	0.226744	6.468	2.79e-10	8.1e-08	13.0184
CD3D|protein_coding	0.818239	1.62851	6.45488	3.01e-10	8.63e-08	12.9432
ADAM19|protein_coding	0.490871	1.34044	6.45078	3.09e-10	8.72e-08	12.9197
C16orf54|protein_coding	0.363301	0.627034	6.44763	3.15e-10	8.75e-08	12.9017
TIGIT|protein_coding	0.254584	0.370133	6.44421	3.21e-10	8.75e-08	12.8822
TLR8|protein_coding	0.354878	0.54226	6.44314	3.23e-10	8.75e-08	12.876
CD5|protein_coding	0.435634	0.827431	6.42488	3.61e-10	9.63e-08	12.7717
HTRA4|protein_coding	0.144062	0.208007	6.41745	3.77e-10	9.93e-08	12.7293
GFI1|protein_coding	0.185271	0.274244	6.40583	4.04e-10	1.05e-07	12.6631
SIRPG|protein_coding	0.425709	0.663011	6.33307	6.23e-10	1.6e-07	12.2508
CLEC10A|protein_coding	0.484349	0.668501	6.31297	7.01e-10	1.77e-07	12.1376
CD40LG|protein_coding	0.230038	0.313142	6.3027	7.45e-10	1.86e-07	12.0799
CCL19|protein_coding	0.733397	0.893451	6.27632	8.7e-10	2.15e-07	11.9319
SDC1|protein_coding	0.9935	4.0786	6.26642	9.22e-10	2.25e-07	11.8765
RHOH|protein_coding	0.21471	0.377762	6.23968	1.08e-09	2.59e-07	11.7273
WIPF1|protein_coding	0.478609	2.19715	6.21752	1.23e-09	2.92e-07	11.604
IKZF3|protein_coding	0.388249	0.729226	6.18507	1.48e-09	3.48e-07	11.4241
NUGGC|protein_coding	0.205577	0.337434	6.18145	1.51e-09	3.51e-07	11.4041
SAMD9|protein_coding	-0.673202	2.51156	-6.17399	1.58e-09	3.62e-07	11.3629
TRAT1|protein_coding	0.25485	0.326949	6.15932	1.72e-09	3.9e-07	11.2819
IL16|protein_coding	0.285377	0.702258	6.14374	1.88e-09	4.22e-07	11.1961
TMEM176B|protein_coding	0.999707	4.39437	6.13588	1.97e-09	4.36e-07	11.1529
CD96|protein_coding	0.352643	0.739427	6.13018	2.04e-09	4.41e-07	11.1216
GRAP2|protein_coding	0.151802	0.226197	6.13006	2.04e-09	4.41e-07	11.121
CXCL12|protein_coding	1.04008	2.91837	6.11963	2.16e-09	4.63e-07	11.0637
SERPINF1|protein_coding	1.10713	4.34873	6.08196	2.69e-09	5.69e-07	10.8577
OAS1|protein_coding	-0.880162	3.75241	-6.07317	2.83e-09	5.92e-07	10.8098
NT5C3A|protein_coding	-0.456136	3.1687	-6.06893	2.9e-09	6e-07	10.7867
ELL2|protein_coding	0.450074	1.40463	6.02605	3.7e-09	7.58e-07	10.554
CD6|protein_coding	0.414798	0.891912	6.01388	3.96e-09	8.04e-07	10.4881
ATP2A3|protein_coding	0.514762	1.44381	6.00148	4.25e-09	8.54e-07	10.4212
CCR7|protein_coding	0.380778	0.741991	5.98768	4.6e-09	9.12e-07	10.3468
IL7R|protein_coding	0.579195	1.02177	5.98615	4.64e-09	9.12e-07	10.3386
FCRL1|protein_coding	0.0707738	0.0371737	5.98374	4.7e-09	9.16e-07	10.3256
GZMH|protein_coding	0.610216	1.10523	5.97975	4.81e-09	9.27e-07	10.3041
DERL3|protein_coding	0.547433	1.21136	5.94613	5.81e-09	1.11e-06	10.1237
PYHIN1|protein_coding	0.230404	0.346252	5.88046	8.4e-09	1.59e-06	9.77388
BASP1|protein_coding	0.911727	3.74972	5.86809	9e-09	1.69e-06	9.70831
RSAD2|protein_coding	-0.815419	2.82666	-5.8347	1.08e-08	2.01e-06	9.532
TMEM176A|protein_coding	0.933191	3.51156	5.82548	1.14e-08	2.09e-06	9.48346
TIMP3|protein_coding	1.09778	5.0519	5.81259	1.22e-08	2.21e-06	9.41575
HERC5|protein_coding	-0.696024	2.32036	-5.81224	1.23e-08	2.21e-06	9.41387
MARCO|protein_coding	0.766754	1.44655	5.81011	1.24e-08	2.22e-06	9.4027
MSC|protein_coding	0.697892	1.47002	5.80262	1.29e-08	2.29e-06	9.3634
CCL13|protein_coding	0.631739	0.775157	5.79866	1.32e-08	2.32e-06	9.34264
DNAJC5B|protein_coding	0.142518	0.197744	5.79064	1.38e-08	2.39e-06	9.30067
OR2I1P|protein_coding	0.488022	0.586076	5.78975	1.39e-08	2.39e-06	9.29601
ITGAL|protein_coding	0.412443	0.959663	5.75844	1.65e-08	2.82e-06	9.13249
SIGLEC10|protein_coding	0.485919	1.03049	5.74881	1.74e-08	2.95e-06	9.08238
CHST11|protein_coding	0.512055	2.13873	5.74055	1.82e-08	3.03e-06	9.0394
C1QTNF6|protein_coding	0.581647	2.01067	5.74037	1.82e-08	3.03e-06	9.03849
HERC6|protein_coding	-0.642708	2.71133	-5.71022	2.15e-08	3.54e-06	8.8822
RFLNB|protein_coding	0.518806	1.92466	5.69155	2.38e-08	3.89e-06	8.78576
ZNF697|protein_coding	0.261365	0.89255	5.68916	2.41e-08	3.91e-06	8.7734
IFIH1|protein_coding	-0.666862	2.86434	-5.68521	2.46e-08	3.96e-06	8.75305
PPP1R18|protein_coding	0.491665	3.49281	5.68097	2.52e-08	4.02e-06	8.73122
ICOS|protein_coding	0.267573	0.406734	5.66535	2.74e-08	4.33e-06	8.6509
PCOLCE|protein_coding	0.798996	4.00323	5.66439	2.75e-08	4.33e-06	8.64595
PRDM8|protein_coding	0.138825	0.285236	5.65883	2.84e-08	4.42e-06	8.61739
F13A1|protein_coding	0.813409	2.47444	5.64541	3.05e-08	4.71e-06	8.54856
GPR68|protein_coding	0.343467	0.733995	5.64426	3.07e-08	4.71e-06	8.54272
SPN|protein_coding	0.298799	0.695578	5.63465	3.23e-08	4.92e-06	8.49352
DDX58|protein_coding	-0.63982	3.413	-5.61781	3.54e-08	5.35e-06	8.4075
IGLL1|protein_coding	0.286871	0.176256	5.61365	3.62e-08	5.43e-06	8.38627
CD7|protein_coding	0.617206	1.59058	5.60612	3.77e-08	5.61e-06	8.3479
MEI1|protein_coding	0.261138	0.384373	5.60187	3.86e-08	5.69e-06	8.32627
TRAF3IP3|protein_coding	0.172467	0.354214	5.58757	4.16e-08	6.05e-06	8.25363
ZMAT3|protein_coding	0.319913	1.58399	5.58729	4.17e-08	6.05e-06	8.25216
CXCL14|protein_coding	1.29171	2.83951	5.58616	4.2e-08	6.05e-06	8.24643
KLRB1|protein_coding	0.32566	0.571098	5.58127	4.31e-08	6.17e-06	8.22163
IL2RA|protein_coding	0.302665	0.624701	5.55912	4.85e-08	6.89e-06	8.10948
IFI6|protein_coding	-1.13848	9.51216	-5.55498	4.96e-08	7e-06	8.08854
TESPA1|protein_coding	0.147587	0.268632	5.53865	5.41e-08	7.58e-06	8.00617
MOB3A|protein_coding	0.316035	3.75993	5.53666	5.46e-08	7.6e-06	7.99611
FAM78A|protein_coding	0.314281	1.11288	5.53278	5.58e-08	7.71e-06	7.97659
FCRL2|protein_coding	0.077356	0.061678	5.52233	5.9e-08	8.09e-06	7.92401
COPZ2|protein_coding	0.644096	2.22634	5.49923	6.66e-08	9.08e-06	7.80813
ARID3A|protein_coding	0.481792	1.35383	5.49473	6.82e-08	9.23e-06	7.78557
EIF2AK2|protein_coding	-0.383248	3.7983	-5.48775	7.08e-08	9.51e-06	7.75068
GZMA|protein_coding	0.732899	1.91654	5.48025	7.37e-08	9.83e-06	7.7132
PRKCB|protein_coding	0.342545	0.629648	5.47796	7.46e-08	9.88e-06	7.70177
RCSD1|protein_coding	0.287855	0.901796	5.47464	7.59e-08	9.98e-06	7.68517
PTPRC|protein_coding	0.531872	1.53144	5.47258	7.67e-08	1e-05	7.67489
TBX21|protein_coding	0.172072	0.282984	5.44836	8.71e-08	1.13e-05	7.55437
SLA2|protein_coding	0.302954	0.64922	5.44463	8.88e-08	1.15e-05	7.53584
IFIT2|protein_coding	-0.741103	2.92719	-5.44133	9.04e-08	1.16e-05	7.51945
ZEB1|protein_coding	0.357111	1.11376	5.43966	9.12e-08	1.16e-05	7.51118
PDCD1|protein_coding	0.412657	0.822056	5.43731	9.23e-08	1.17e-05	7.49948
TNFRSF9|protein_coding	0.249999	0.483828	5.43587	9.3e-08	1.17e-05	7.49236
FAAH|protein_coding	-0.444249	2.846	-5.4286	9.66e-08	1.21e-05	7.45635
IFFO1|protein_coding	0.333692	1.09927	5.42748	9.72e-08	1.21e-05	7.45078
EVI2B|protein_coding	0.673887	2.512	5.42592	9.8e-08	1.21e-05	7.44308
ZNF831|protein_coding	0.0675668	0.0697007	5.42499	9.85e-08	1.21e-05	7.43847
NTM|protein_coding	0.534991	0.784833	5.41609	1.03e-07	1.26e-05	7.39443
LOXL2|protein_coding	0.592772	2.67242	5.40343	1.1e-07	1.33e-05	7.3319
NKD2|protein_coding	0.756568	1.97284	5.39685	1.14e-07	1.37e-05	7.2995
SHISA2|protein_coding	0.477227	0.77707	5.38897	1.19e-07	1.42e-05	7.26067
GZMM|protein_coding	0.351535	0.703941	5.37876	1.25e-07	1.49e-05	7.21048
DYRK3|protein_coding	-0.318817	1.56013	-5.37583	1.27e-07	1.5e-05	7.19606
VCAN|protein_coding	0.883252	2.28913	5.37018	1.31e-07	1.54e-05	7.16835
KCNJ10|protein_coding	0.198638	0.277848	5.36421	1.35e-07	1.58e-05	7.13905
ACAP1|protein_coding	0.26352	1.10215	5.36055	1.38e-07	1.6e-05	7.12112
PARP12|protein_coding	-0.492038	3.71078	-5.35421	1.42e-07	1.64e-05	7.09006
OASL|protein_coding	-0.780596	2.40796	-5.34231	1.51e-07	1.73e-05	7.03188
TIFAB|protein_coding	0.0953562	0.111443	5.331	1.6e-07	1.83e-05	6.97672
AC135068|protein_coding	0.0949439	0.0824595	5.32523	1.65e-07	1.87e-05	6.9486
POU2F2|protein_coding	0.281949	1.07678	5.32034	1.69e-07	1.91e-05	6.92478
FAP|protein_coding	0.615495	1.02934	5.3166	1.73e-07	1.93e-05	6.90659
RASSF4|protein_coding	0.368106	1.75155	5.31366	1.75e-07	1.94e-05	6.89227
PTPN7|protein_coding	0.358396	0.999044	5.31366	1.75e-07	1.94e-05	6.89226
PRRX1|protein_coding	0.76495	1.61891	5.30817	1.8e-07	1.98e-05	6.86559
DOK2|protein_coding	0.483727	1.72929	5.30307	1.85e-07	2.03e-05	6.84083
CMKLR1|protein_coding	0.419955	1.20364	5.29018	1.98e-07	2.15e-05	6.77833
CTSK|protein_coding	0.871413	2.3374	5.28012	2.08e-07	2.24e-05	6.72964
IGSF6|protein_coding	0.428614	1.51463	5.28006	2.08e-07	2.24e-05	6.72939
MOXD1|protein_coding	0.576062	1.1385	5.27355	2.15e-07	2.3e-05	6.69793
RTP5|protein_coding	0.0432127	0.0306454	5.26088	2.3e-07	2.45e-05	6.6368
CYP2J2|protein_coding	-0.488276	1.43476	-5.24503	2.49e-07	2.63e-05	6.56049
CTLA4|protein_coding	0.283695	0.476411	5.24437	2.5e-07	2.63e-05	6.55734
TGFB1|protein_coding	0.592104	4.25299	5.24081	2.55e-07	2.67e-05	6.54021
IL2RG|protein_coding	0.596343	1.63217	5.23694	2.6e-07	2.7e-05	6.52163
CD247|protein_coding	0.28346	0.607074	5.23126	2.67e-07	2.77e-05	6.49439
SH3PXD2A|protein_coding	0.494473	2.66808	5.2212	2.81e-07	2.9e-05	6.44615
ETS1|protein_coding	0.398071	2.34894	5.21732	2.87e-07	2.94e-05	6.42762
COL5A1|protein_coding	1.09691	4.07421	5.20272	3.09e-07	3.15e-05	6.35782
FN1|protein_coding	1.18462	5.57664	5.18322	3.41e-07	3.46e-05	6.26489
SEL1L|protein_coding	0.323171	3.07038	5.17831	3.49e-07	3.52e-05	6.24156
MARVELD1|protein_coding	0.546482	4.15468	5.17285	3.59e-07	3.6e-05	6.2156
FLI1|protein_coding	0.268021	0.99964	5.16762	3.68e-07	3.68e-05	6.19078
IFI27|protein_coding	-1.07777	6.641	-5.1668	3.7e-07	3.68e-05	6.18691
GPNMB|protein_coding	0.815423	4.06734	5.14348	4.16e-07	4.11e-05	6.07648
IRF8|protein_coding	0.436196	1.39934	5.14147	4.2e-07	4.12e-05	6.067
NKG7|protein_coding	0.848152	2.83261	5.14086	4.21e-07	4.12e-05	6.06409
PIM2|protein_coding	0.508763	3.65418	5.1316	4.41e-07	4.3e-05	6.0204
PDPN|protein_coding	0.747824	2.6685	5.12708	4.51e-07	4.37e-05	5.99911
BTBD8|protein_coding	-0.203111	0.936692	-5.12055	4.66e-07	4.5e-05	5.96834
HSPB11|protein_coding	-0.418568	3.39565	-5.11813	4.72e-07	4.53e-05	5.95696
CFD|protein_coding	0.685688	2.9134	5.10813	4.96e-07	4.72e-05	5.90995
RAI14|protein_coding	0.499445	3.12613	5.10764	4.97e-07	4.72e-05	5.90764
CLEC12A|protein_coding	0.287047	0.477541	5.10674	5e-07	4.72e-05	5.90342
TMEM244|protein_coding	0.0296178	0.0222487	5.09985	5.17e-07	4.83e-05	5.87108
GPR176|protein_coding	0.358685	1.03662	5.0996	5.18e-07	4.83e-05	5.8699
PMP22|protein_coding	0.471491	1.88742	5.09949	5.18e-07	4.83e-05	5.86939
FOLR2|protein_coding	0.623005	2.885	5.07829	5.75e-07	5.34e-05	5.77017
UBASH3A|protein_coding	0.165199	0.314279	5.07355	5.89e-07	5.44e-05	5.74802
PDCD1LG2|protein_coding	0.387842	0.965673	5.07202	5.94e-07	5.45e-05	5.74085
SMIM27|protein_coding	-0.179446	0.664671	-5.06426	6.17e-07	5.64e-05	5.70468
ALG6|protein_coding	-0.258058	2.16784	-5.06247	6.22e-07	5.64e-05	5.69635
TNFRSF10D|protein_coding	0.375287	1.09319	5.0622	6.23e-07	5.64e-05	5.69508
OAS3|protein_coding	-0.751842	4.03468	-5.05486	6.46e-07	5.83e-05	5.66087
SNAI2|protein_coding	0.637558	1.94913	5.046	6.75e-07	6.06e-05	5.61971
DCN|protein_coding	0.932262	3.97958	5.04509	6.78e-07	6.06e-05	5.61547
ANGPTL2|protein_coding	0.59824	2.99107	5.03641	7.08e-07	6.29e-05	5.57519
AEBP1|protein_coding	0.989613	5.47791	5.0355	7.11e-07	6.29e-05	5.57093
AGAP2|protein_coding	0.141762	0.385002	5.03188	7.24e-07	6.38e-05	5.55417
CCL17|protein_coding	0.399817	0.5655	5.03075	7.28e-07	6.38e-05	5.54893
ADAMTS2|protein_coding	0.661142	1.73893	5.02839	7.36e-07	6.43e-05	5.538
OLFML1|protein_coding	0.526226	1.86444	5.0264	7.43e-07	6.46e-05	5.52878
BGN|protein_coding	0.840023	7.13427	5.02377	7.53e-07	6.52e-05	5.5166
MMP19|protein_coding	0.501023	1.66438	5.00528	8.24e-07	7.11e-05	5.43114
RASSF2|protein_coding	0.392977	1.94068	5.00161	8.39e-07	7.2e-05	5.41421
CLMP|protein_coding	0.500937	1.26992	5.00019	8.45e-07	7.22e-05	5.40769
CCL5|protein_coding	0.897617	3.6912	4.99885	8.51e-07	7.24e-05	5.40151
CCL22|protein_coding	0.258387	0.428545	4.98687	9.02e-07	7.64e-05	5.34636
RASAL3|protein_coding	0.353152	1.10506	4.98099	9.28e-07	7.83e-05	5.31933
SPIB|protein_coding	0.147994	0.220483	4.97713	9.46e-07	7.94e-05	5.3016
COL5A2|protein_coding	0.956098	3.4374	4.96959	9.81e-07	8.2e-05	5.26702
CD244|protein_coding	0.131904	0.225859	4.95652	1.05e-06	8.7e-05	5.20718
FYB1|protein_coding	0.438258	1.36904	4.93861	1.14e-06	9.45e-05	5.12542
GM2A|protein_coding	0.306155	4.07613	4.92966	1.19e-06	9.83e-05	5.08461
TENM3|protein_coding	0.438046	0.761787	4.92153	1.24e-06	0.000101814	5.04767
JSRP1|protein_coding	0.476689	0.762271	4.91882	1.26e-06	0.000102727	5.03531
IL2RB|protein_coding	0.59951	1.73029	4.91207	1.3e-06	0.000105536	5.0047
CRISPLD2|protein_coding	0.690523	2.00248	4.91149	1.3e-06	0.000105536	5.00205
PLEK|protein_coding	0.602877	2.50438	4.91053	1.31e-06	0.000105587	4.99768
SEMA4A|protein_coding	0.45202	2.39672	4.90733	1.33e-06	0.000106785	4.98317
MMP14|protein_coding	0.72329	5.3574	4.90131	1.37e-06	0.000109035	4.95592
THBS2|protein_coding	0.965831	2.17475	4.90128	1.37e-06	0.000109035	4.9558
CD79B|protein_coding	0.287135	0.539318	4.89788	1.39e-06	0.000110383	4.9404
COL8A1|protein_coding	0.81515	2.28608	4.89647	1.4e-06	0.000110686	4.93399
CDH11|protein_coding	0.644821	2.183	4.89267	1.42e-06	0.000112209	4.91683
CD37|protein_coding	0.482234	2.22452	4.89194	1.43e-06	0.000112209	4.91351
LUM|protein_coding	1.25949	5.27215	4.88851	1.45e-06	0.000113612	4.89803
COL1A1|protein_coding	1.11109	8.25299	4.87494	1.55e-06	0.000120769	4.8368
ANTXR2|protein_coding	0.344823	1.18872	4.87029	1.59e-06	0.000123	4.81583
COL6A2|protein_coding	0.854866	6.09643	4.86877	1.6e-06	0.000123405	4.809
EFCAB7|protein_coding	-0.210873	1.22172	-4.86576	1.62e-06	0.000124704	4.79543
MEAF6|protein_coding	-0.313424	4.05365	-4.8645	1.63e-06	0.000124959	4.7898
SPARC|protein_coding	0.827452	7.65488	4.8616	1.65e-06	0.00012621	4.77674
FGGY|protein_coding	-0.222616	0.859757	-4.85799	1.68e-06	0.000127904	4.76051
COL10A1|protein_coding	0.98076	2.3328	4.85408	1.71e-06	0.000129809	4.74295
MMP2|protein_coding	0.914446	5.12338	4.85326	1.72e-06	0.000129815	4.73925
TMEM156|protein_coding	0.167366	0.318478	4.84992	1.75e-06	0.000131392	4.72427
DNPEP|protein_coding	-0.242735	3.84313	-4.84046	1.83e-06	0.000136919	4.6819
SEC23A|protein_coding	0.292656	2.63017	4.83947	1.84e-06	0.000137044	4.67744
RCN3|protein_coding	0.68497	4.63362	4.8343	1.88e-06	0.000139921	4.65431
DRAM1|protein_coding	0.397298	2.28172	4.82214	1.99e-06	0.000147685	4.59997
NKX3-2|protein_coding	0.408956	0.605631	4.82033	2.01e-06	0.000147946	4.59188
LRP8|protein_coding	-0.317977	1.11774	-4.82017	2.01e-06	0.000147946	4.59119
CD84|protein_coding	0.386501	1.14841	4.81728	2.04e-06	0.000149428	4.57828
MRC1|protein_coding	0.428599	1.12591	4.81483	2.06e-06	0.000150604	4.56739
TMEM273|protein_coding	0.252633	0.716292	4.81019	2.11e-06	0.000153384	4.54669
KLRK1|protein_coding	0.0372023	0.0456103	4.80745	2.14e-06	0.000154401	4.53452
OSCP1|protein_coding	-0.40439	2.50448	-4.80722	2.14e-06	0.000154401	4.5335
GIMAP7|protein_coding	0.465358	1.89722	4.8013	2.2e-06	0.000158209	4.50713
RAB30|protein_coding	0.180738	0.811407	4.79792	2.24e-06	0.000160165	4.49212
CLIC2|protein_coding	0.339046	1.42327	4.79465	2.27e-06	0.000162065	4.47759
ENOX1|protein_coding	0.260575	0.678422	4.78948	2.33e-06	0.000165466	4.45465
RGS16|protein_coding	0.628856	2.85347	4.78791	2.35e-06	0.000166088	4.4477
CCL11|protein_coding	0.786915	1.62106	4.78496	2.38e-06	0.000167809	4.43461
STBD1|protein_coding	-0.233054	0.743463	-4.77393	2.5e-06	0.000176126	4.38578
COL3A1|protein_coding	1.12777	6.92037	4.7704	2.55e-06	0.000178436	4.37016
AOAH|protein_coding	0.480758	1.39112	4.768	2.58e-06	0.000179252	4.35956
COL6A3|protein_coding	0.839519	3.72928	4.76791	2.58e-06	0.000179252	4.35914
STAT4|protein_coding	0.149337	0.314875	4.76584	2.6e-06	0.000180358	4.35002
ATP6V0A1|protein_coding	0.25797	2.25967	4.76474	2.62e-06	0.000180653	4.34515
STX11|protein_coding	0.241083	0.706598	4.7621	2.65e-06	0.000182262	4.3335
EMILIN1|protein_coding	0.765257	3.71017	4.76037	2.67e-06	0.000183104	4.32586
SMIM3|protein_coding	0.476378	3.15789	4.75759	2.7e-06	0.000184858	4.3136
LILRB2|protein_coding	0.414654	1.35697	4.75605	2.72e-06	0.00018555	4.30681
BIN2|protein_coding	0.376511	1.28793	4.75216	2.77e-06	0.00018778	4.28965
COL6A1|protein_coding	0.837139	6.11564	4.75202	2.78e-06	0.00018778	4.28905
SNX20|protein_coding	0.294866	0.758766	4.74591	2.86e-06	0.000192128	4.26214
CCR5|protein_coding	0.378292	1.01824	4.74566	2.86e-06	0.000192128	4.26106
MMP12|protein_coding	0.712453	1.04825	4.74492	2.87e-06	0.000192133	4.2578
PTGDR|protein_coding	0.0696976	0.140255	4.74133	2.92e-06	0.000194725	4.242
HCLS1|protein_coding	0.510761	2.2932	4.73607	2.99e-06	0.000198897	4.2189
INHBA|protein_coding	0.736894	1.57043	4.73437	3.02e-06	0.000199805	4.21142
PALLD|protein_coding	0.489258	3.11225	4.71513	3.3e-06	0.000217846	4.12711
EMP3|protein_coding	0.514306	3.91938	4.71423	3.31e-06	0.000218022	4.12317
FSTL3|protein_coding	0.512145	2.58695	4.71109	3.36e-06	0.000220444	4.10944
PLSCR1|protein_coding	-0.534198	4.6503	-4.70995	3.38e-06	0.000220444	4.10446
GALNT5|protein_coding	0.243564	0.455542	4.7097	3.38e-06	0.000220444	4.10334
NCF2|protein_coding	0.435771	1.84209	4.70683	3.43e-06	0.000222424	4.09081
CD8B|protein_coding	0.299565	0.422128	4.70634	3.44e-06	0.000222424	4.0887
FBN1|protein_coding	0.596732	1.75389	4.69225	3.67e-06	0.0002367	4.02723
SRPX|protein_coding	0.550462	2.19624	4.6843	3.81e-06	0.000244778	3.99265
COL1A2|protein_coding	0.930701	6.97026	4.67891	3.9e-06	0.000250152	3.96919
NFIB|protein_coding	-0.440019	3.21907	-4.67374	4e-06	0.000255366	3.94677
ANTXR1|protein_coding	0.651201	3.89757	4.67034	4.06e-06	0.000257253	3.93198
CIRBP|protein_coding	0.329515	4.03226	4.66942	4.08e-06	0.000257253	3.928
SFRP5|protein_coding	0.581483	0.842147	4.66916	4.08e-06	0.000257253	3.92687
KIF26B|protein_coding	0.486797	1.21394	4.66892	4.09e-06	0.000257253	3.92586
LILRB3|protein_coding	0.266711	0.92409	4.66864	4.09e-06	0.000257253	3.92461
ZC3H12D|protein_coding	0.104447	0.295212	4.66416	4.18e-06	0.00026103	3.90522
LY6E|protein_coding	-0.655948	8.79602	-4.66409	4.18e-06	0.00026103	3.90492
MKLN1|protein_coding	-0.172071	1.76511	-4.66206	4.22e-06	0.000262654	3.8961
COL11A1|protein_coding	0.979865	1.92728	4.65809	4.3e-06	0.00026666	3.87892
GRAMD1C|protein_coding	-0.350562	1.30689	-4.65719	4.32e-06	0.000266922	3.87502
DDX60|protein_coding	-0.464176	2.19074	-4.6549	4.36e-06	0.0002689	3.86513
AKAP5|protein_coding	0.114	0.385751	4.64673	4.53e-06	0.000278341	3.82982
ECM1|protein_coding	0.678189	2.77341	4.64304	4.61e-06	0.000280855	3.8139
CNN2|protein_coding	0.6265	4.75947	4.64303	4.61e-06	0.000280855	3.81385
MEIS3|protein_coding	0.427846	1.07901	4.64273	4.61e-06	0.000280855	3.81256
LZTS1|protein_coding	0.346885	1.12756	4.6338	4.81e-06	0.000291719	3.77407
ISM1|protein_coding	0.624532	1.77232	4.62635	4.97e-06	0.000300925	3.74203
FRMD6|protein_coding	0.333821	1.27502	4.62338	5.04e-06	0.000304111	3.72926
C3orf80|protein_coding	0.348481	0.739102	4.62164	5.08e-06	0.000304951	3.72176
TGFB3|protein_coding	0.452029	1.58544	4.6212	5.09e-06	0.000304951	3.71988
OLFML2B|protein_coding	0.714203	2.85067	4.62077	5.1e-06	0.000304951	3.71801
COMP|protein_coding	1.10691	2.76266	4.61953	5.13e-06	0.000305745	3.71271
PTGIS|protein_coding	0.769422	2.54973	4.60778	5.42e-06	0.000318517	3.66229
HESX1|protein_coding	-0.22769	0.903321	-4.60773	5.42e-06	0.000318517	3.66207
EVL|protein_coding	0.306419	2.48077	4.60769	5.42e-06	0.000318517	3.66189
PNPT1|protein_coding	-0.284704	2.98558	-4.60747	5.42e-06	0.000318517	3.66097
GLIPR1|protein_coding	0.331683	1.43643	4.60728	5.43e-06	0.000318517	3.66015
NMI|protein_coding	-0.377914	3.85884	-4.60625	5.46e-06	0.000319065	3.65572
RAC2|protein_coding	0.570269	3.2982	4.60535	5.48e-06	0.000319411	3.6519
ADAMTS12|protein_coding	0.528791	1.29289	4.6037	5.52e-06	0.000320875	3.64482
ZEB2|protein_coding	0.223532	0.776236	4.59871	5.65e-06	0.000327288	3.62349
THPO|protein_coding	0.098015	0.150932	4.59736	5.68e-06	0.000328349	3.61767
PLPP6|protein_coding	-0.306048	2.25826	-4.58791	5.93e-06	0.000341789	3.57733
FOXP3|protein_coding	0.301011	1.00819	4.58239	6.08e-06	0.00034878	3.55379
INPP5D|protein_coding	0.433747	1.66475	4.58217	6.09e-06	0.00034878	3.55284
PRKD1|protein_coding	0.297022	1.23156	4.57994	6.15e-06	0.000351302	3.54335
VCAM1|protein_coding	0.615291	1.92105	4.57074	6.41e-06	0.000364649	3.50416
UBE2QL1|protein_coding	0.244734	0.394626	4.57046	6.42e-06	0.000364649	3.50296
ADRA1B|protein_coding	0.584945	1.42839	4.56471	6.59e-06	0.000373199	3.47853
NSUN4|protein_coding	-0.215635	2.39944	-4.56392	6.62e-06	0.000373465	3.47515
ARSB|protein_coding	0.205086	1.14067	4.56142	6.69e-06	0.000376638	3.46452
NUAK1|protein_coding	0.449469	1.74663	4.56061	6.72e-06	0.000376919	3.46112
HSH2D|protein_coding	-0.555854	2.5724	-4.55975	6.74e-06	0.000377312	3.45745
MARCKS|protein_coding	0.449077	5.01875	4.55547	6.87e-06	0.000383603	3.43929
SP100|protein_coding	-0.322979	2.69713	-4.54959	7.06e-06	0.000392823	3.41438
AC007906|protein_coding	-0.714863	2.87349	-4.54511	7.2e-06	0.000399726	3.39541
GAS7|protein_coding	0.37913	1.84889	4.54336	7.26e-06	0.000401756	3.38801
ICA1L|protein_coding	-0.209223	0.815058	-4.5416	7.32e-06	0.000403832	3.38053
CYP26A1|protein_coding	0.164877	0.196421	4.53891	7.41e-06	0.000407602	3.36919
CD52|protein_coding	0.549449	2.30475	4.53713	7.47e-06	0.000409746	3.36164
RAB31|protein_coding	0.491841	3.2664	4.53302	7.61e-06	0.000415489	3.34429
SEMA7A|protein_coding	0.356002	1.75363	4.5328	7.62e-06	0.000415489	3.34336
ERICH2|protein_coding	-0.439098	2.21405	-4.52859	7.76e-06	0.000421352	3.32559
CYB5R3|protein_coding	0.291951	5.034	4.52845	7.77e-06	0.000421352	3.32502
PARP15|protein_coding	0.124389	0.30759	4.52725	7.81e-06	0.000422464	3.31996
PLPPR2|protein_coding	0.42563	3.43886	4.51925	8.1e-06	0.000436766	3.28622
GCLM|protein_coding	-0.327457	2.66103	-4.51858	8.12e-06	0.000436876	3.28339
IL10RA|protein_coding	0.413753	1.48298	4.51787	8.15e-06	0.000437056	3.28043
IFIT5|protein_coding	-0.378585	2.96975	-4.51098	8.4e-06	0.000448489	3.25142
PLAU|protein_coding	0.766069	3.59274	4.51091	8.4e-06	0.000448489	3.25114
ARHGEF6|protein_coding	0.301278	1.41097	4.4928	9.12e-06	0.00048513	3.17514
EXOC3L1|protein_coding	-0.230313	1.22343	-4.48941	9.26e-06	0.000491154	3.16095
LRRC15|protein_coding	0.777938	1.30394	4.48882	9.28e-06	0.000491154	3.15851
PRF1|protein_coding	0.432429	1.2259	4.48776	9.32e-06	0.000492163	3.15405
SIRPB2|protein_coding	0.230573	0.571288	4.48487	9.45e-06	0.000497221	3.14196
ITGA11|protein_coding	0.638934	1.67848	4.4799	9.66e-06	0.000507025	3.12119
LY96|protein_coding	0.556575	2.9612	4.47771	9.75e-06	0.00051062	3.11207
C1QB|protein_coding	0.824546	6.64976	4.4763	9.81e-06	0.000512485	3.10615
DDX60L|protein_coding	-0.296592	1.24004	-4.47528	9.86e-06	0.000513437	3.10191
IFT172|protein_coding	-0.261018	2.12604	-4.4724	9.99e-06	0.000518701	3.08988
DOCK2|protein_coding	0.264015	0.789751	4.46951	1.01e-05	0.00052403	3.07784
ANXA6|protein_coding	0.403436	3.84534	4.46856	1.02e-05	0.00052486	3.07388
SPNS2|protein_coding	0.418907	1.58524	4.46586	1.03e-05	0.000529824	3.06261
ETV1|protein_coding	0.352191	1.06148	4.46327	1.04e-05	0.000532648	3.05185
GFPT2|protein_coding	0.437327	1.44412	4.46314	1.04e-05	0.000532648	3.05129
LAIR1|protein_coding	0.453348	1.83499	4.46289	1.04e-05	0.000532648	3.05025
TDRD7|protein_coding	-0.337139	2.38932	-4.45866	1.06e-05	0.000541341	3.03268
FZD1|protein_coding	0.453557	2.58408	4.45608	1.07e-05	0.000546184	3.02191
FASLG|protein_coding	0.226634	0.417956	4.45474	1.08e-05	0.000548011	3.01635
ACTG2|protein_coding	0.725596	1.95139	4.45044	1.1e-05	0.000556547	2.99851
ANKRD22|protein_coding	0.334471	0.825832	4.45009	1.1e-05	0.000556547	2.99706
KHDRBS2|protein_coding	0.121596	0.0960527	4.44754	1.12e-05	0.000560886	2.98647
KCNE4|protein_coding	0.404116	0.95187	4.44718	1.12e-05	0.000560886	2.98498
PLXNC1|protein_coding	0.25503	1.33208	4.44536	1.13e-05	0.000564001	2.9774
CD48|protein_coding	0.39965	1.19131	4.44477	1.13e-05	0.000564014	2.97498
PDGFRB|protein_coding	0.583664	3.06139	4.44196	1.14e-05	0.00056963	2.96333
SPATA6L|protein_coding	-0.186646	0.512896	-4.43743	1.17e-05	0.000579567	2.94454
MS4A4A|protein_coding	0.466825	1.84648	4.43692	1.17e-05	0.000579567	2.94241
LOX|protein_coding	0.703486	2.53251	4.43501	1.18e-05	0.000582604	2.93454
AC019117|protein_coding	-0.259435	0.419447	-4.43459	1.18e-05	0.000582604	2.93279
SPATA1|protein_coding	-0.0578776	0.187796	-4.43262	1.19e-05	0.000586226	2.92464
ARRDC5|protein_coding	0.106693	0.211972	4.43136	1.2e-05	0.000588027	2.91942
IL9R|protein_coding	0.0474868	0.0770262	4.42672	1.22e-05	0.000597454	2.90022
CCDC30|protein_coding	-0.140028	0.495991	-4.42663	1.22e-05	0.000597454	2.89987
IPP|protein_coding	-0.22379	2.19317	-4.42302	1.24e-05	0.000605552	2.88496
P2RY14|protein_coding	0.120969	0.262631	4.42195	1.25e-05	0.000606918	2.88053
MMP9|protein_coding	0.917494	3.2713	4.42082	1.26e-05	0.000608443	2.87586
SNIP1|protein_coding	-0.217714	2.10785	-4.41656	1.28e-05	0.000618466	2.85828
MAFB|protein_coding	0.50766	4.13115	4.41485	1.29e-05	0.00062161	2.85123
PECAM1|protein_coding	0.390053	2.79924	4.41385	1.3e-05	0.000622814	2.84712
SVEP1|protein_coding	0.348854	0.67363	4.40601	1.34e-05	0.000643135	2.81484
ZCCHC24|protein_coding	0.440532	2.11843	4.40461	1.35e-05	0.000645518	2.80909
PARS2|protein_coding	-0.253153	3.29144	-4.39197	1.43e-05	0.000680789	2.75715
DUSP28|protein_coding	-0.186882	1.20799	-4.3893	1.44e-05	0.000687144	2.74619
DYSF|protein_coding	0.280929	1.49941	4.38499	1.47e-05	0.000697246	2.72854
LIN7A|protein_coding	0.116136	0.252387	4.38487	1.47e-05	0.000697246	2.72802
HEPH|protein_coding	0.351114	1.15488	4.37453	1.54e-05	0.000727826	2.6857
CD300LF|protein_coding	0.290073	0.816001	4.36742	1.59e-05	0.000747763	2.65667
SAMD3|protein_coding	0.0516397	0.1066	4.36725	1.59e-05	0.000747763	2.65597
MXRA8|protein_coding	0.80214	4.48124	4.36268	1.62e-05	0.000761032	2.63731
COLEC12|protein_coding	0.469634	1.57523	4.36004	1.64e-05	0.000767998	2.62657
GATA3|protein_coding	0.390204	1.05171	4.35536	1.67e-05	0.000780616	2.60749
NPL|protein_coding	0.309397	1.58299	4.35521	1.68e-05	0.000780616	2.6069
SCHIP1|protein_coding	0.053293	0.107567	4.35108	1.71e-05	0.000792592	2.59008
AP003419|protein_coding	-0.147291	0.455041	-4.35063	1.71e-05	0.000792592	2.58825
TRPV2|protein_coding	0.294932	1.50041	4.34722	1.73e-05	0.000801028	2.5744
CD226|protein_coding	0.0591347	0.152043	4.34711	1.74e-05	0.000801028	2.57394
GTF2IRD2B|protein_coding	-0.193982	1.18498	-4.34559	1.75e-05	0.000804433	2.56778
NCKAP1L|protein_coding	0.369338	1.32903	4.34286	1.77e-05	0.000812155	2.55667
FCGR3A|protein_coding	0.683244	3.79421	4.33787	1.81e-05	0.000828051	2.5364
PATJ|protein_coding	-0.26056	2.58307	-4.33422	1.84e-05	0.000839298	2.52164
CMTM3|protein_coding	0.359375	3.95633	4.33256	1.85e-05	0.000843399	2.5149
GAB3|protein_coding	0.179249	0.588683	4.33168	1.86e-05	0.000844659	2.51133
CNRIP1|protein_coding	0.319269	1.32586	4.32745	1.89e-05	0.000857101	2.49421
CD248|protein_coding	0.597332	3.07371	4.32722	1.89e-05	0.000857101	2.49326
GPR25|protein_coding	0.253317	0.383775	4.32671	1.9e-05	0.000857101	2.49119
NFIA|protein_coding	-0.266395	1.384	-4.32351	1.92e-05	0.000867067	2.47826
CTHRC1|protein_coding	0.809713	4.57166	4.32262	1.93e-05	0.000867277	2.47465
LPXN|protein_coding	0.321476	2.44174	4.32239	1.93e-05	0.000867277	2.47373
XIRP1|protein_coding	0.122964	0.130909	4.31644	1.98e-05	0.000887884	2.44969
ADAM12|protein_coding	0.600067	1.50899	4.3119	2.02e-05	0.000903467	2.43134
YRDC|protein_coding	-0.288571	3.30208	-4.31053	2.03e-05	0.000906736	2.42584
AL020996|protein_coding	-0.0398641	0.109501	-4.30438	2.09e-05	0.000929072	2.40104
ZNF469|protein_coding	0.447622	1.29132	4.30373	2.1e-05	0.000929571	2.39841
LRRC42|protein_coding	-0.272624	4.51005	-4.30276	2.1e-05	0.000931339	2.39452
TRAPPC3|protein_coding	-0.279973	4.44168	-4.30045	2.13e-05	0.000938552	2.38522
GMNC|protein_coding	-0.797996	1.62709	-4.298	2.15e-05	0.00094642	2.37533
NFAM1|protein_coding	0.315085	1.12903	4.29212	2.2e-05	0.000968551	2.35169
SLC35A3|protein_coding	-0.204595	1.44296	-4.2906	2.22e-05	0.000972688	2.34562
EBI3|protein_coding	0.45758	1.54688	4.28876	2.24e-05	0.000978268	2.3382
CPT2|protein_coding	-0.187404	1.37265	-4.28214	2.3e-05	0.00100415	2.31164
WDR12|protein_coding	-0.206758	2.21823	-4.28165	2.3e-05	0.00100415	2.3097
SERPINE1|protein_coding	0.872233	3.62325	4.27927	2.33e-05	0.00101226	2.30013
MPEG1|protein_coding	0.530481	2.29948	4.27622	2.36e-05	0.0010222	2.28795
FNDC1|protein_coding	0.6756	2.25471	4.27596	2.36e-05	0.0010222	2.28688
MTAP|protein_coding	-0.227276	1.62674	-4.27527	2.37e-05	0.00102293	2.28415
DLL1|protein_coding	0.366686	0.994559	4.27209	2.4e-05	0.00103475	2.27139
ITGA5|protein_coding	0.485507	2.97293	4.27133	2.41e-05	0.00103581	2.26838
LILRB4|protein_coding	0.47564	1.78406	4.27028	2.42e-05	0.0010382	2.26418
ARHGAP9|protein_coding	0.284911	1.01893	4.26231	2.5e-05	0.00106896	2.23233
PLEKHA3|protein_coding	-0.169473	1.73544	-4.26196	2.51e-05	0.00106896	2.2309
IFIT3|protein_coding	-0.680573	4.74061	-4.26186	2.51e-05	0.00106896	2.23051
FNIP2|protein_coding	0.186611	1.07252	4.26144	2.51e-05	0.00106896	2.22883
OAS2|protein_coding	-0.731032	3.9173	-4.25929	2.54e-05	0.00107649	2.22026
PTGER4|protein_coding	0.320805	1.42389	4.25719	2.56e-05	0.00107989	2.2119
TGFBR3|protein_coding	-0.368201	2.10435	-4.25707	2.56e-05	0.00107989	2.2114
CD44|protein_coding	0.475579	2.82305	4.25703	2.56e-05	0.00107989	2.21126
CHIT1|protein_coding	0.303154	0.353499	4.25648	2.57e-05	0.0010801	2.20907
SLC39A9|protein_coding	0.258101	3.42124	4.25388	2.6e-05	0.00108986	2.19869
USP18|protein_coding	-0.537596	3.57127	-4.25143	2.62e-05	0.00109898	2.18893
GOLIM4|protein_coding	0.358207	3.22082	4.25061	2.63e-05	0.00110046	2.18567
CPVL|protein_coding	0.522057	3.14948	4.25002	2.64e-05	0.0011009	2.18331
LIMD2|protein_coding	0.430383	2.78624	4.24942	2.65e-05	0.00110137	2.18092
SP110|protein_coding	-0.32479	2.18991	-4.24736	2.67e-05	0.00110873	2.17274
ITM2A|protein_coding	0.452845	2.04369	4.24606	2.68e-05	0.00111044	2.16756
CPXM2|protein_coding	0.740139	1.82909	4.24601	2.69e-05	0.00111044	2.16734
SEMA3D|protein_coding	0.284622	0.546821	4.24526	2.69e-05	0.00111165	2.16436
TGFBI|protein_coding	0.638497	4.12169	4.24366	2.71e-05	0.00111692	2.15799
DPEP2|protein_coding	0.138808	0.447827	4.24189	2.73e-05	0.00112301	2.15096
IFITM1|protein_coding	-0.692194	7.78371	-4.23858	2.77e-05	0.00113486	2.13781
FCRL4|protein_coding	0.0155494	0.0123973	4.23837	2.77e-05	0.00113486	2.13699
RHOBTB3|protein_coding	0.404405	1.58285	4.23795	2.78e-05	0.00113486	2.13532
TGFBR2|protein_coding	0.37527	3.38313	4.23686	2.79e-05	0.00113779	2.13098
TOE1|protein_coding	-0.259113	2.83691	-4.23434	2.82e-05	0.00114767	2.12098
PPP2R3B|protein_coding	-0.284677	1.67542	-4.23339	2.83e-05	0.00114992	2.11722
IGFL2|protein_coding	0.490863	0.83338	4.22697	2.91e-05	0.00117935	2.09178
GNG2|protein_coding	0.247666	1.02314	4.22631	2.92e-05	0.00118025	2.08913
SASH3|protein_coding	0.47806	2.00912	4.22554	2.93e-05	0.00118165	2.0861
CLC|protein_coding	0.193228	0.179786	4.22336	2.96e-05	0.0011902	2.07747
SGPP1|protein_coding	0.326238	2.01156	4.22182	2.98e-05	0.00119555	2.07138
MRTFA|protein_coding	0.257372	2.80881	4.21795	3.03e-05	0.00121292	2.05605
SCIMP|protein_coding	0.216568	0.706122	4.21654	3.04e-05	0.00121761	2.05048
FGR|protein_coding	0.352704	1.43644	4.21605	3.05e-05	0.00121761	2.04853
FILIP1L|protein_coding	0.486998	2.38134	4.21559	3.06e-05	0.00121761	2.04674
EPYC|protein_coding	0.949915	1.66938	4.2145	3.07e-05	0.00122079	2.04241
CPN2|protein_coding	0.0314683	0.0352618	4.21341	3.09e-05	0.00122396	2.0381
MOV10|protein_coding	-0.305519	3.96912	-4.20739	3.17e-05	0.00125307	2.01435
PHETA2|protein_coding	0.313113	2.70556	4.20194	3.24e-05	0.00127976	1.99287
LRGUK|protein_coding	-0.164887	0.503295	-4.19965	3.27e-05	0.00128963	1.98384
COL4A1|protein_coding	0.4577	3.99106	4.19807	3.29e-05	0.00129569	1.9776
CERK|protein_coding	0.35091	3.59185	4.19291	3.37e-05	0.00132158	1.95733
CD53|protein_coding	0.598886	3.48142	4.18818	3.43e-05	0.00134558	1.93873
RUBCNL|protein_coding	0.114736	0.351329	4.18729	3.45e-05	0.00134797	1.93521
CD4|protein_coding	0.492388	3.67832	4.18484	3.48e-05	0.00135783	1.92562
XCR1|protein_coding	0.099057	0.138645	4.18461	3.49e-05	0.00135783	1.92471
IFNB1|protein_coding	-0.103895	0.133506	-4.18254	3.52e-05	0.00136704	1.91657
ST7L|protein_coding	-0.177912	1.47243	-4.18198	3.52e-05	0.00136755	1.91437
TGFB1I1|protein_coding	0.452416	2.89588	4.17585	3.62e-05	0.00140057	1.89035
SSC5D|protein_coding	0.47552	1.54228	4.1716	3.68e-05	0.00142304	1.87371
NXNL2|protein_coding	-0.660106	2.59637	-4.17076	3.7e-05	0.00142526	1.87042
C1QA|protein_coding	0.702042	6.20041	4.16865	3.73e-05	0.00143517	1.86215
TMC8|protein_coding	0.318076	1.56342	4.16707	3.75e-05	0.00144189	1.85597
TIMP2|protein_coding	0.508724	5.2128	4.16583	3.77e-05	0.0014466	1.85111
MAF|protein_coding	0.438975	2.37338	4.16373	3.81e-05	0.00145653	1.84293
TENT5C|protein_coding	0.414975	1.85448	4.1623	3.83e-05	0.00146245	1.83734
SLC36A1|protein_coding	0.225848	1.36201	4.15623	3.93e-05	0.00149502	1.81362
PSTPIP1|protein_coding	0.248859	0.901704	4.15613	3.93e-05	0.00149502	1.81324
MX2|protein_coding	-0.475846	2.59407	-4.15395	3.97e-05	0.00150579	1.80476
ARMC10|protein_coding	-0.236767	3.88272	-4.15219	4e-05	0.00151402	1.79789
ARHGEF28|protein_coding	-0.230776	1.14104	-4.14943	4.04e-05	0.00152867	1.78714
MARS2|protein_coding	-0.223243	2.65516	-4.14544	4.11e-05	0.00155145	1.7716
SFRP4|protein_coding	0.897036	3.21433	4.14255	4.16e-05	0.00156735	1.76034
ACTN1|protein_coding	0.329426	4.80412	4.13799	4.24e-05	0.00159448	1.74261
MEDAG|protein_coding	0.4979	1.36099	4.13206	4.35e-05	0.00163135	1.71959
ATPAF1|protein_coding	-0.276843	4.19352	-4.12903	4.4e-05	0.00164893	1.70785
BARX1|protein_coding	0.524391	0.839607	4.12749	4.43e-05	0.00165388	1.70188
MPL|protein_coding	-0.138167	0.500275	-4.12739	4.43e-05	0.00165388	1.7015
MAP1LC3B2|protein_coding	-0.17775	0.681989	-4.12689	4.44e-05	0.00165423	1.69953
GZMB|protein_coding	0.555007	1.5519	4.12621	4.45e-05	0.00165577	1.69689
PDGFD|protein_coding	0.406886	1.80176	4.12486	4.48e-05	0.0016619	1.6917
COL4A2|protein_coding	0.430868	4.08978	4.12233	4.53e-05	0.00167639	1.68187
OMA1|protein_coding	-0.241738	2.22201	-4.1166	4.64e-05	0.00171367	1.65969
DCAF5|protein_coding	0.23305	3.10555	4.11104	4.75e-05	0.00174985	1.63823
CCDC183|protein_coding	-0.137289	0.527948	-4.11063	4.75e-05	0.00174985	1.63664
KIF5C|protein_coding	-0.22564	0.649699	-4.11021	4.76e-05	0.00174985	1.63503
MYO1G|protein_coding	0.21637	0.895439	4.10819	4.8e-05	0.00176137	1.6272
KDF1|protein_coding	-0.331526	3.99867	-4.10764	4.81e-05	0.00176202	1.62511
SFRP2|protein_coding	1.31796	3.47303	4.10553	4.86e-05	0.00177423	1.61696
CEACAM21|protein_coding	0.202697	0.480149	4.10445	4.88e-05	0.00177885	1.61281
PTPN22|protein_coding	0.223574	0.710113	4.09948	4.98e-05	0.00181153	1.59362
EIF1|protein_coding	0.207599	6.67805	4.09917	4.99e-05	0.00181153	1.59245
CLEC6A|protein_coding	0.0822816	0.120683	4.09849	5e-05	0.00181329	1.58982
TM2D1|protein_coding	-0.239421	2.81611	-4.09778	5.01e-05	0.0018148	1.5871
ACTA2|protein_coding	0.73849	4.25379	4.09725	5.03e-05	0.0018148	1.58504
C1orf122|protein_coding	-0.354818	4.66248	-4.09695	5.03e-05	0.0018148	1.58388
LEXM|protein_coding	-0.134149	0.358661	-4.09486	5.08e-05	0.00182719	1.57585
P3H4|protein_coding	0.317389	3.37304	4.09342	5.11e-05	0.00183477	1.5703
LSP1|protein_coding	0.421985	2.40016	4.09121	5.15e-05	0.00184825	1.5618
IGFBP4|protein_coding	0.551734	6.42426	4.08425	5.3e-05	0.00189876	1.53508
CDKN1A|protein_coding	0.483916	3.92752	4.08271	5.34e-05	0.00190743	1.52916
CDC37L1|protein_coding	-0.240013	2.24066	-4.0821	5.35e-05	0.00190877	1.5268
FGL2|protein_coding	0.450059	1.82594	4.08125	5.37e-05	0.00191197	1.52355
CYB5RL|protein_coding	-0.159009	1.0219	-4.07958	5.41e-05	0.00191913	1.51715
FERMT3|protein_coding	0.445187	2.67028	4.07947	5.41e-05	0.00191913	1.51671
LCP1|protein_coding	0.543341	3.79864	4.07522	5.51e-05	0.00194953	1.50044
KIAA0513|protein_coding	0.168085	0.648416	4.07398	5.53e-05	0.00195597	1.4957
ITGBL1|protein_coding	0.232722	0.377451	4.07292	5.56e-05	0.00195958	1.49164
MTX2|protein_coding	-0.257978	4.82596	-4.07266	5.56e-05	0.00195958	1.49063
LATS2|protein_coding	0.276396	2.2018	4.07148	5.59e-05	0.00196562	1.48611
CDKL1|protein_coding	-0.209333	0.864876	-4.07035	5.62e-05	0.00197123	1.48179
GRIN3A|protein_coding	0.0414093	0.100594	4.06929	5.64e-05	0.00197455	1.47772
EIF2B3|protein_coding	-0.214233	2.765	-4.06886	5.65e-05	0.00197455	1.47609
FCER2|protein_coding	0.0988983	0.0779993	4.06864	5.66e-05	0.00197455	1.47523
CLTRN|protein_coding	-0.219614	0.673084	-4.06428	5.76e-05	0.00200426	1.45857
CCDC80|protein_coding	0.624204	2.57869	4.06415	5.76e-05	0.00200426	1.45807
SMKR1|protein_coding	-0.483959	2.77665	-4.06265	5.8e-05	0.00201307	1.45235
GLT8D2|protein_coding	0.470064	1.89045	4.05494	5.99e-05	0.00207173	1.42291
C1QTNF1|protein_coding	0.507079	2.61059	4.05481	5.99e-05	0.00207173	1.42243
UNC93B1|protein_coding	-0.376271	5.0623	-4.05354	6.02e-05	0.00207888	1.41759
CHRD|protein_coding	0.214315	0.578646	4.05121	6.08e-05	0.00209518	1.40871
LHFPL6|protein_coding	0.377961	1.92179	4.05012	6.11e-05	0.00209973	1.40454
ARSI|protein_coding	0.280606	0.664922	4.04983	6.11e-05	0.00209973	1.40343
KCNK7|protein_coding	-0.141016	0.455374	-4.04483	6.24e-05	0.00213947	1.38442
SPOCD1|protein_coding	0.119644	0.258113	4.04028	6.36e-05	0.00217605	1.36708
GPR174|protein_coding	0.192877	0.29946	4.0391	6.39e-05	0.00218277	1.3626
FERMT2|protein_coding	0.28022	2.72359	4.03416	6.52e-05	0.00222346	1.34386
GTF3C3|protein_coding	-0.209599	3.02607	-4.03082	6.61e-05	0.00225016	1.33119
KLHL6|protein_coding	0.178102	0.553711	4.02853	6.67e-05	0.00226197	1.32252
RCL1|protein_coding	-0.253385	2.38866	-4.02847	6.67e-05	0.00226197	1.32228
SMOC2|protein_coding	0.541669	2.79054	4.02826	6.68e-05	0.00226197	1.32149
ITGB2|protein_coding	0.5806	3.25899	4.02769	6.69e-05	0.0022626	1.31931
TMEM158|protein_coding	0.723171	2.75273	4.02735	6.7e-05	0.0022626	1.31802
TMEM119|protein_coding	0.580844	2.123	4.02354	6.81e-05	0.00229412	1.3036
ISLR|protein_coding	0.737675	5.09313	4.02274	6.83e-05	0.00229769	1.30056
EVI2A|protein_coding	0.345087	1.32558	4.02013	6.9e-05	0.00231646	1.29068
BMF|protein_coding	0.42126	2.68973	4.01966	6.92e-05	0.00231646	1.28891
CERCAM|protein_coding	0.444799	3.72605	4.01948	6.92e-05	0.00231646	1.28824
BICC1|protein_coding	0.366099	1.23261	4.01732	6.98e-05	0.00232925	1.28007
HIC1|protein_coding	0.312217	1.18303	4.01729	6.98e-05	0.00232925	1.27997
GPR1|protein_coding	0.261259	0.597146	4.01574	7.03e-05	0.00234007	1.27409
MS4A6A|protein_coding	0.499107	2.31517	4.01402	7.08e-05	0.00235252	1.2676
LOXL1|protein_coding	0.508052	3.81509	4.01175	7.14e-05	0.00237042	1.259
CCL4|protein_coding	0.52047	2.41025	4.01076	7.17e-05	0.00237595	1.25527
HLA-DQA2|protein_coding	0.921283	2.79779	4.00916	7.22e-05	0.00238741	1.24924
TRMT44|protein_coding	-0.190173	1.41291	-4.00384	7.38e-05	0.00243558	1.22918
HOXD3|protein_coding	-0.75377	2.50593	-4.00142	7.45e-05	0.00245557	1.22004
POSTN|protein_coding	1.02142	2.77041	3.99998	7.49e-05	0.00246577	1.21464
YY2|protein_coding	-0.108697	0.456753	-3.99883	7.53e-05	0.00247321	1.21029
IKZF1|protein_coding	0.243127	0.838311	3.99771	7.56e-05	0.00247878	1.2061
SELPLG|protein_coding	0.469669	2.63758	3.99745	7.57e-05	0.00247878	1.20509
WDR77|protein_coding	-0.325841	3.97321	-3.99645	7.6e-05	0.00248469	1.20133
AP002748|protein_coding	-0.105596	0.382664	-3.9952	7.64e-05	0.00248926	1.19665
PODN|protein_coding	0.536983	1.79848	3.99517	7.64e-05	0.00248926	1.19653
GJB2|protein_coding	0.785882	2.77295	3.99251	7.73e-05	0.002511	1.18653
SLFN12L|protein_coding	0.0282874	0.0593782	3.99221	7.74e-05	0.002511	1.18539
GIMAP5|protein_coding	0.0452624	0.0894385	3.98888	7.84e-05	0.00254091	1.17289
AXL|protein_coding	0.396063	3.1126	3.98506	7.96e-05	0.00257638	1.15853
SERPINH1|protein_coding	0.349418	5.86627	3.98293	8.03e-05	0.00259443	1.15053
ZNF800|protein_coding	-0.175374	2.40909	-3.97642	8.25e-05	0.00265936	1.12613
AOC3|protein_coding	0.402622	1.22566	3.97478	8.3e-05	0.00266883	1.11999
C11orf87|protein_coding	0.0496145	0.0423284	3.97442	8.31e-05	0.00266883	1.11866
CTSZ|protein_coding	0.35869	6.19428	3.97431	8.32e-05	0.00266883	1.11826
FBXL13|protein_coding	-0.143926	0.572828	-3.97367	8.34e-05	0.00267143	1.11584
LCP2|protein_coding	0.379967	1.78206	3.97191	8.4e-05	0.00268014	1.10927
PPP3CC|protein_coding	0.209237	1.65223	3.97187	8.4e-05	0.00268014	1.10913
HCK|protein_coding	0.444537	2.21181	3.97164	8.41e-05	0.00268014	1.10827
CABP4|protein_coding	-0.207768	0.604047	-3.97091	8.43e-05	0.00268376	1.10551
PHTF1|protein_coding	-0.206177	1.74192	-3.96853	8.51e-05	0.0027053	1.09661
SMCO4|protein_coding	0.397068	3.36817	3.96809	8.53e-05	0.00270565	1.09498
HOXD1|protein_coding	-0.621959	1.72808	-3.96649	8.58e-05	0.00271883	1.08898
MYH10|protein_coding	0.404663	3.98396	3.96224	8.73e-05	0.00276139	1.07311
SLC2A3|protein_coding	0.477563	2.3773	3.95789	8.89e-05	0.00280565	1.05691
CD164L2|protein_coding	-0.407456	1.12088	-3.956	8.96e-05	0.00282259	1.04985
IL32|protein_coding	0.609064	4.0476	3.95366	9.04e-05	0.00284469	1.04114
FDCSP|protein_coding	0.385913	0.487871	3.95156	9.12e-05	0.00286424	1.03332
CYBB|protein_coding	0.620986	3.26766	3.9502	9.17e-05	0.00287538	1.02824
CYP27B1|protein_coding	0.166529	0.490969	3.94882	9.22e-05	0.00288669	1.02312
DOCK7|protein_coding	-0.158226	1.29296	-3.94755	9.27e-05	0.00289637	1.01836
MAB21L2|protein_coding	0.157127	0.149956	3.94719	9.28e-05	0.00289637	1.01706
RFX8|protein_coding	0.141239	0.254044	3.93997	9.55e-05	0.00297692	0.990223
TNC|protein_coding	0.582224	2.19943	3.93853	9.61e-05	0.00298947	0.984856
SULF2|protein_coding	0.532185	2.80106	3.93755	9.65e-05	0.00299546	0.98122
MRPL37|protein_coding	-0.237319	5.63187	-3.93724	9.66e-05	0.00299546	0.98006
GREB1|protein_coding	-0.554055	1.94952	-3.93622	9.7e-05	0.00300292	0.976289
LILRB1|protein_coding	0.31391	1.20538	3.9356	9.72e-05	0.00300568	0.973972
RTP4|protein_coding	-0.589833	3.74376	-3.9331	9.82e-05	0.00303111	0.964722
CD28|protein_coding	0.118154	0.394562	3.93149	9.88e-05	0.00304593	0.958751
ZNF726|protein_coding	-0.211002	0.808762	-3.93075	9.91e-05	0.00304689	0.956003
CYP7B1|protein_coding	0.256204	0.876163	3.93062	9.92e-05	0.00304689	0.955538
AC009336|protein_coding	-0.233821	0.513237	-3.92996	9.94e-05	0.00305024	0.953067
HYAL3|protein_coding	-0.342685	2.22336	-3.92931	9.97e-05	0.00305331	0.950685
CXCR5|protein_coding	0.0112089	0.0148293	3.92637	0.000100885	0.00308469	0.939786
ATP6V1D|protein_coding	0.203657	3.33745	3.92498	0.000101448	0.00309556	0.934649
PARP10|protein_coding	-0.468241	4.33382	-3.92443	0.000101673	0.00309556	0.932605
LIMA1|protein_coding	0.285392	2.76922	3.92432	0.000101718	0.00309556	0.932196
XYLT1|protein_coding	0.213211	0.53229	3.92126	0.00010297	0.00312878	0.92089
ZC3HAV1|protein_coding	-0.215957	3.1402	-3.92011	0.000103448	0.0031384	0.916614
PANX2|protein_coding	-0.420622	1.63317	-3.91964	0.000103641	0.00313938	0.914887
BCL2A1|protein_coding	0.450314	1.88193	3.91755	0.000104513	0.00315716	0.907155
MTF1|protein_coding	-0.225519	1.9489	-3.91745	0.000104552	0.00315716	0.906804
KCNQ4|protein_coding	-0.349877	1.24498	-3.91391	0.000106042	0.00319718	0.893736
BHLHE22|protein_coding	0.117542	0.210814	3.91268	0.000106567	0.00320803	0.889178
PDLIM3|protein_coding	0.467113	1.56249	3.91153	0.000107055	0.00321776	0.884957
VSIG10|protein_coding	-0.237542	2.11016	-3.90907	0.000108113	0.00324457	0.875868
MEGF10|protein_coding	0.193688	0.276066	3.90641	0.000109267	0.00327415	0.866064
TMEM128|protein_coding	-0.281258	3.87394	-3.90166	0.000111357	0.00332821	0.848571
SLCO2B1|protein_coding	0.474034	1.91421	3.90153	0.000111413	0.00332821	0.848106
RGS22|protein_coding	-0.203258	0.404171	-3.90002	0.000112086	0.00333624	0.842548
DLX5|protein_coding	0.545605	1.10184	3.89982	0.000112175	0.00333624	0.841812
TTC22|protein_coding	-0.341895	2.43127	-3.89977	0.000112196	0.00333624	0.841643
CDC14A|protein_coding	-0.199468	1.33957	-3.89799	0.000112996	0.00335286	0.835079
MINDY4|protein_coding	-0.069267	0.233773	-3.89776	0.000113099	0.00335286	0.834238
C2CD4D|protein_coding	-0.260424	1.19458	-3.89592	0.000113932	0.00337243	0.827462
CORIN|protein_coding	0.122024	0.212877	3.89412	0.000114749	0.00339147	0.820864
EFEMP1|protein_coding	0.638324	2.72028	3.8937	0.000114943	0.00339203	0.819308
MYB|protein_coding	-0.371434	1.50478	-3.89153	0.000115937	0.00341618	0.811362
CSGALNACT2|protein_coding	0.222714	2.74254	3.89	0.000116647	0.00343192	0.805725
SNX10|protein_coding	0.35238	2.34042	3.88728	0.000117912	0.00346391	0.795768
CFAP69|protein_coding	-0.170653	0.70539	-3.88591	0.000118558	0.00347379	0.790727
FMC1|protein_coding	-0.369201	1.72343	-3.88581	0.000118605	0.00347379	0.790359
EDIL3|protein_coding	0.427668	1.43576	3.88375	0.00011958	0.0034949	0.782801
EDA2R|protein_coding	0.203051	0.602611	3.88346	0.000119714	0.0034949	0.781767
MSRB3|protein_coding	0.336172	1.46161	3.88296	0.000119955	0.0034949	0.779911
MTHFD2L|protein_coding	-0.218572	1.18408	-3.88277	0.000120044	0.0034949	0.77923
CREB3L1|protein_coding	0.559602	2.93075	3.88153	0.000120639	0.00350699	0.774665
DYDC2|protein_coding	-0.387504	1.35264	-3.88028	0.000121238	0.00351916	0.770092
CASP8|protein_coding	-0.241145	3.01699	-3.8798	0.000121468	0.0035206	0.768341
MMP11|protein_coding	1.00996	4.13525	3.87511	0.000123749	0.00358138	0.751173
BCL2L14|protein_coding	-0.22058	0.655065	-3.86929	0.000126632	0.00365937	0.729926
GIMAP6|protein_coding	0.327098	1.71974	3.86783	0.000127368	0.00367422	0.724583
ACYP2|protein_coding	-0.276384	2.06593	-3.86752	0.000127523	0.00367422	0.723456
DPT|protein_coding	0.266433	0.411615	3.86626	0.000128163	0.00368719	0.718842
PPM1J|protein_coding	-0.299819	1.34227	-3.86472	0.000128943	0.00370002	0.713247
PLXDC1|protein_coding	0.247334	0.995738	3.86463	0.000128989	0.00370002	0.712917
CTPS1|protein_coding	-0.267287	2.10526	-3.86309	0.000129778	0.00371717	0.707292
SPCS3|protein_coding	0.251149	3.89289	3.86128	0.000130708	0.00373832	0.700705
POLA2|protein_coding	-0.189872	1.05318	-3.86024	0.000131247	0.00374824	0.696905
GTPBP10|protein_coding	-0.143813	1.61473	-3.85523	0.000133867	0.0038119	0.678678
CYP4B1|protein_coding	-0.90468	3.41	-3.85523	0.000133868	0.0038119	0.678673
FMNL1|protein_coding	0.275126	2.28521	3.84998	0.00013667	0.00388602	0.659567
MICAL1|protein_coding	0.27899	1.81411	3.84772	0.000137894	0.00391511	0.651344
PIK3R5|protein_coding	0.215926	0.86369	3.84342	0.000140245	0.00397606	0.635757
DNAJC1|protein_coding	0.263249	3.11331	3.84206	0.000141002	0.0039917	0.630797
POMGNT1|protein_coding	-0.212773	4.00237	-3.8404	0.000141925	0.00401201	0.624778
RAB8B|protein_coding	0.210487	2.01583	3.83955	0.000142398	0.00401954	0.621715
AC007240|protein_coding	-0.174884	0.633153	-3.83777	0.000143402	0.00404203	0.615235
FGF1|protein_coding	0.254114	0.627874	3.83543	0.000144727	0.00407348	0.606759
OLFML2A|protein_coding	0.493488	2.26777	3.83273	0.00014627	0.00411097	0.596983
CAVIN1|protein_coding	0.483682	5.06995	3.83172	0.000146851	0.00412136	0.593327
FOXF1|protein_coding	0.174996	0.486235	3.83079	0.000147388	0.00413048	0.589963
BSDC1|protein_coding	-0.200681	3.94391	-3.83035	0.00014764	0.00413159	0.58839
CORO1C|protein_coding	0.243303	3.48918	3.82927	0.000148265	0.00414313	0.584496
WIPI1|protein_coding	0.252749	2.21878	3.8214	0.000152915	0.00426694	0.55604
HSPA2|protein_coding	0.391682	2.15901	3.81984	0.000153849	0.00428687	0.550428
AIF1|protein_coding	0.521876	3.72265	3.81655	0.000155848	0.00433636	0.538534
CCDC171|protein_coding	-0.117599	0.475516	-3.81459	0.000157045	0.00435728	0.531489
WDFY4|protein_coding	0.1678	0.51214	3.81459	0.000157048	0.00435728	0.531471
CD1B|protein_coding	0.142994	0.160913	3.81036	0.000159665	0.0044215	0.516245
SAMD13|protein_coding	-0.170638	0.531756	-3.81012	0.000159816	0.0044215	0.515375
VGLL3|protein_coding	0.231603	0.541793	3.80954	0.000160177	0.00442487	0.513295
ENTPD7|protein_coding	0.200077	1.38291	3.8092	0.000160392	0.00442487	0.512059
ANXA5|protein_coding	0.310704	6.40912	3.80618	0.000162295	0.00447103	0.501197
AIFM1|protein_coding	-0.292247	2.89224	-3.80045	0.00016596	0.00456554	0.480629
PLA2G2C|protein_coding	-0.166102	0.381674	-3.79972	0.000166436	0.00457219	0.477989
HELZ2|protein_coding	-0.421191	3.10465	-3.79895	0.000166934	0.00457939	0.475243
COL16A1|protein_coding	0.437563	2.07025	3.79808	0.000167506	0.00458862	0.472093
HLA-DQB2|protein_coding	0.628859	2.14271	3.79708	0.00016816	0.00460008	0.468501
KRTCAP3|protein_coding	-0.423025	4.95554	-3.79571	0.000169055	0.00461807	0.463616
FKBP11|protein_coding	0.261367	2.51673	3.795	0.000169524	0.00462227	0.461064
THBS1|protein_coding	0.588056	3.99269	3.79476	0.000169683	0.00462227	0.4602
P2RX7|protein_coding	0.17455	0.759776	3.79274	0.000171026	0.00465233	0.452944
ZDHHC21|protein_coding	-0.202933	1.70681	-3.78969	0.000173066	0.00470128	0.442023
FCGR2A|protein_coding	0.442163	2.61009	3.78826	0.00017403	0.00472086	0.436913
BEAN1|protein_coding	0.101675	0.284645	3.78373	0.000177126	0.00479814	0.42068
MGAT1|protein_coding	0.238544	3.82424	3.78337	0.000177371	0.00479814	0.419406
LY75|protein_coding	-0.27227	1.4552	-3.78222	0.000178167	0.00481297	0.415287
PMEPA1|protein_coding	0.546439	3.19127	3.78044	0.000179405	0.00483971	0.408912
PIK3AP1|protein_coding	0.314814	1.83762	3.77976	0.000179875	0.00484567	0.406506
DCBLD1|protein_coding	0.223846	1.71188	3.77885	0.000180511	0.00485609	0.403257
TYW3|protein_coding	-0.211512	2.47615	-3.77815	0.000181007	0.0048624	0.400732
WFDC2|protein_coding	-0.620861	9.7189	-3.77781	0.000181245	0.0048624	0.399522
BANP|protein_coding	-0.144284	1.64395	-3.77582	0.000182645	0.00489323	0.392439
ARHGAP30|protein_coding	0.299096	2.04887	3.77286	0.000184754	0.00494294	0.381873
TUBB4A|protein_coding	0.631029	1.94513	3.76655	0.000189329	0.00505837	0.35937
NKX2-3|protein_coding	0.0821765	0.0946768	3.76618	0.000189596	0.00505857	0.358073
IFNL1|protein_coding	-0.22352	0.365157	-3.76348	0.000191592	0.00510484	0.348437
DIO2|protein_coding	0.324119	0.519633	3.76285	0.000192054	0.00511015	0.346221
MMP25|protein_coding	0.104008	0.445842	3.75967	0.000194434	0.00516643	0.334891
APTX|protein_coding	-0.152038	1.26536	-3.75776	0.000195875	0.00519763	0.328098
PDGFRA|protein_coding	0.418561	1.54895	3.75674	0.000196645	0.00520889	0.324492
GDF9|protein_coding	-0.147455	0.542703	-3.75649	0.000196834	0.00520889	0.323605
CHRNA1|protein_coding	0.32082	0.579881	3.75491	0.000198044	0.0052338	0.317968
DOK3|protein_coding	0.252572	1.51049	3.75371	0.000198961	0.00525091	0.31372
GKAP1|protein_coding	-0.22762	1.54546	-3.75299	0.000199516	0.00525841	0.311162
RTN1|protein_coding	0.274019	0.94548	3.74838	0.000203097	0.00533984	0.2948
WAS|protein_coding	0.381173	2.4456	3.7483	0.000203154	0.00533984	0.294545
ADGRG5|protein_coding	0.175998	0.386564	3.74731	0.00020393	0.00535303	0.291036
ZMYM6|protein_coding	-0.134406	1.166	-3.74645	0.000204614	0.00536376	0.287957
TSPAN18|protein_coding	0.418223	1.79899	3.74377	0.000206736	0.0054121	0.278469
FGD3|protein_coding	0.198814	1.34543	3.74307	0.000207294	0.00541942	0.275992
FLRT2|protein_coding	0.162813	0.40336	3.74261	0.000207662	0.00542176	0.274362
CENPC|protein_coding	-0.14609	1.39433	-3.74126	0.00020874	0.0054426	0.269603
ADAMDEC1|protein_coding	0.538252	1.32088	3.73779	0.000211547	0.00550843	0.257321
SUGCT|protein_coding	0.352462	1.30507	3.73692	0.00021226	0.00551962	0.254227
PTPN1|protein_coding	0.214701	3.917	3.73432	0.000214393	0.00556763	0.245039
SLC7A7|protein_coding	0.378575	2.06118	3.73288	0.000215578	0.00558873	0.23997
SCP2|protein_coding	-0.236611	3.86882	-3.73264	0.000215779	0.00558873	0.239114
PLA2G7|protein_coding	0.379877	1.62726	3.73089	0.000217231	0.00561886	0.232952
HSPE1|protein_coding	-0.347658	4.898	-3.72878	0.000219002	0.00565715	0.225489
HOPX|protein_coding	0.385148	1.70236	3.72709	0.000220424	0.00568635	0.21954
AGBL3|protein_coding	-0.119599	0.548792	-3.72593	0.000221406	0.00570413	0.215455
PRPF38A|protein_coding	-0.181085	3.60063	-3.72311	0.000223818	0.00575865	0.205498
PUM3|protein_coding	-0.268019	3.57513	-3.7199	0.000226591	0.00582231	0.194184
ARHGAP24|protein_coding	0.133559	0.47398	3.71559	0.000230362	0.00591142	0.179018
SULF1|protein_coding	0.741307	3.37647	3.71499	0.000230885	0.00591704	0.176935
PPM1M|protein_coding	0.235291	2.54196	3.71437	0.000231432	0.00592327	0.17476
ERMN|protein_coding	0.0729069	0.114202	3.71328	0.000232406	0.00594039	0.170902
SEMA6A|protein_coding	0.331334	1.00642	3.71153	0.000233968	0.00597247	0.16475
VAT1|protein_coding	0.303899	5.28343	3.70843	0.000236757	0.0060357	0.153866
PPP1R9B|protein_coding	0.300299	4.16547	3.70803	0.000237118	0.0060357	0.152464
ZBTB8OS|protein_coding	-0.248136	2.83213	-3.70774	0.000237374	0.0060357	0.151473
GFRA1|protein_coding	0.358971	0.536543	3.70415	0.000240651	0.00611104	0.138881
ZYG11B|protein_coding	-0.181316	2.52993	-3.70142	0.000243176	0.00615465	0.129296
GNB2|protein_coding	-0.212898	6.83158	-3.70134	0.000243247	0.00615465	0.12903
ANKRD1|protein_coding	0.268567	0.454099	3.70127	0.000243317	0.00615465	0.128766
SPOCK1|protein_coding	0.424884	1.05317	3.69833	0.00024606	0.0062116	0.118471
SELENOM|protein_coding	0.613274	4.00393	3.69817	0.000246206	0.0062116	0.117925
GPD2|protein_coding	-0.301327	3.58265	-3.69539	0.000248835	0.0062698	0.108174
KDELR3|protein_coding	0.437238	4.11489	3.695	0.000249198	0.00627083	0.106836
TEX29|protein_coding	0.0982412	0.275653	3.69167	0.000252379	0.00633905	0.0951878
FAM155A|protein_coding	0.102692	0.260578	3.69149	0.00025256	0.00633905	0.0945328
SCGB3A1|protein_coding	-0.761949	2.01529	-3.69012	0.000253874	0.0063588	0.0897656
PIK3R3|protein_coding	-0.385652	2.74076	-3.68999	0.000253999	0.0063588	0.0893138
EPHX4|protein_coding	-0.443223	2.25007	-3.68893	0.000255027	0.00637565	0.0856066
NETO1|protein_coding	0.0852656	0.102876	3.68798	0.000255951	0.00637565	0.0822892
GBP5|protein_coding	0.413707	1.33075	3.68772	0.000256204	0.00637565	0.081382
PSMB2|protein_coding	-0.228819	5.46339	-3.68763	0.000256294	0.00637565	0.0810567
HAND2|protein_coding	0.234958	0.536416	3.68738	0.000256535	0.00637565	0.0801967
DHRS7|protein_coding	0.297595	2.7242	3.68728	0.000256636	0.00637565	0.079833
TNN|protein_coding	0.0715407	0.133404	3.68676	0.000257145	0.00638015	0.078014
GSDMA|protein_coding	0.167453	0.375921	3.68642	0.000257478	0.00638028	0.0768276
P4HA3|protein_coding	0.17594	0.571451	3.68493	0.000258938	0.0064083	0.0716383
ASPA|protein_coding	0.0490819	0.0844536	3.68382	0.00026003	0.00642481	0.0677757
PPARGC1A|protein_coding	0.14669	0.205556	3.68359	0.000260265	0.00642481	0.0669467
DOCK8|protein_coding	0.232781	1.05353	3.68257	0.000261268	0.00644141	0.0634153
NBL1|protein_coding	0.532836	4.58205	3.68131	0.00026252	0.00646411	0.0590265
SCARF2|protein_coding	0.447777	3.11878	3.68007	0.000263759	0.0064864	0.0547076
RASA3|protein_coding	0.323221	2.10599	3.67432	0.000269587	0.00661406	0.0346513
MAPRE2|protein_coding	0.253114	2.24644	3.67427	0.000269629	0.00661406	0.0345076
TMEM204|protein_coding	0.271248	2.16763	3.67351	0.000270408	0.00662483	0.03186
GRK5|protein_coding	0.15849	0.73635	3.67162	0.00027236	0.00665327	0.0252609
SLC16A9|protein_coding	-0.504709	2.33614	-3.67147	0.00027251	0.00665327	0.0247562
NQO1|protein_coding	-0.541741	3.91648	-3.67139	0.000272594	0.00665327	0.0244729
PCNX1|protein_coding	0.16508	1.65712	3.66922	0.000274842	0.00668806	0.0169382
RIMBP3|protein_coding	0.0179457	0.0384089	3.6692	0.000274869	0.00668806	0.0168474
SH3GL1|protein_coding	0.198286	4.62781	3.66902	0.000275049	0.00668806	0.0162457
ADGRA2|protein_coding	0.399978	2.02575	3.66835	0.000275752	0.0066968	0.0139037
GPT|protein_coding	-0.479981	1.89771	-3.66734	0.000276811	0.00671414	0.0103883
TSC22D3|protein_coding	0.405834	3.65985	3.66622	0.000277982	0.00673415	0.00651639
CYREN|protein_coding	-0.168625	2.25299	-3.66392	0.000280412	0.00678457	-0.00146704
GMPR|protein_coding	-0.539724	4.62492	-3.66291	0.000281485	0.00680208	-0.00496979
OSBPL8|protein_coding	0.184715	2.45251	3.66257	0.000281852	0.00680252	-0.00616636
ADAMTS16|protein_coding	0.332064	0.603809	3.65956	0.000285081	0.00687194	-0.016616
PPIH|protein_coding	-0.267457	2.88301	-3.65891	0.000285775	0.00687983	-0.0188435
TTC26|protein_coding	-0.213307	1.96746	-3.6586	0.000286115	0.00687983	-0.0199348
TCTEX1D4|protein_coding	-0.281323	0.876001	-3.65763	0.000287164	0.00689035	-0.023291
TCF4|protein_coding	0.202568	1.32728	3.65754	0.00028726	0.00689035	-0.0235987
SLA|protein_coding	0.271015	1.14506	3.65624	0.000288677	0.00691583	-0.0281121
TAGAP|protein_coding	0.240531	0.954183	3.6548	0.00029025	0.00694444	-0.0330935
AC010319|protein_coding	-0.191959	0.747123	-3.65449	0.000290585	0.00694444	-0.0341522
ANOS1|protein_coding	0.383378	1.49796	3.65356	0.000291614	0.0069605	-0.037395
KTI12|protein_coding	-0.199618	1.63249	-3.65065	0.00029483	0.00702865	-0.047452
NDUFS5|protein_coding	-0.313746	8.22514	-3.64938	0.000296242	0.00705368	-0.0518332
SSU72|protein_coding	-0.232536	4.75283	-3.64758	0.000298266	0.00709319	-0.0580745
STYXL1|protein_coding	-0.248444	4.45683	-3.64649	0.000299488	0.00711357	-0.0618235
GALC|protein_coding	0.215034	2.34898	3.64299	0.000303471	0.0071994	-0.0739363
MYO1F|protein_coding	0.279586	1.47638	3.63877	0.000308325	0.0073025	-0.0884822
ZNHIT2|protein_coding	-0.26345	3.45322	-3.63847	0.000308676	0.0073025	-0.0895245
TPRG1|protein_coding	-0.34137	0.923693	-3.63824	0.000308942	0.0073025	-0.090314
SYT12|protein_coding	-0.319732	0.981068	-3.63745	0.000309859	0.00731531	-0.0930312
TCEANC2|protein_coding	-0.12439	1.10123	-3.63234	0.000315865	0.00744806	-0.110624
CRISPLD1|protein_coding	0.411843	1.45445	3.63106	0.000317389	0.00747495	-0.115036
C1orf109|protein_coding	-0.254948	2.87623	-3.62952	0.000319235	0.00750936	-0.120351
LIPA|protein_coding	0.313097	3.82767	3.62899	0.000319865	0.00751164	-0.122158
NEGR1|protein_coding	0.119344	0.206289	3.62879	0.000320104	0.00751164	-0.12284
HOXD4|protein_coding	-0.774803	3.58326	-3.6261	0.00032335	0.00757868	-0.132085
DGKA|protein_coding	0.229167	1.51546	3.62245	0.000327816	0.00767412	-0.144652
SCMH1|protein_coding	-0.244293	3.50017	-3.62187	0.00032853	0.0076816	-0.146645
DNAH5|protein_coding	-0.131364	0.341539	-3.62083	0.000329813	0.00769825	-0.150217
XKRX|protein_coding	-0.117614	0.304469	-3.62065	0.000330032	0.00769825	-0.150826
COTL1|protein_coding	0.330708	3.75178	3.61787	0.000333487	0.00775492	-0.160365
NBPF15|protein_coding	0.233015	1.17818	3.6178	0.000333576	0.00775492	-0.160611
TUBA8|protein_coding	-0.0723338	0.201007	-3.61773	0.000333656	0.00775492	-0.16083
RAD50|protein_coding	-0.0586244	0.317758	-3.6162	0.00033557	0.00778305	-0.16607
PTCHD4|protein_coding	0.0864497	0.130745	3.61613	0.000335666	0.00778305	-0.16633
OSTM1|protein_coding	0.213382	2.09045	3.61505	0.000337023	0.00780523	-0.170026
LCA5L|protein_coding	-0.146084	0.621689	-3.61396	0.000338398	0.00782776	-0.173754
EPB41L3|protein_coding	0.2188	0.896352	3.6107	0.000342549	0.00791439	-0.184922
DRP2|protein_coding	0.0591571	0.183706	3.60977	0.000343748	0.00792772	-0.188122
NCF1|protein_coding	0.268272	0.958805	3.60962	0.00034394	0.00792772	-0.188633
ECHDC2|protein_coding	-0.276043	2.40592	-3.60709	0.000347208	0.00798598	-0.197294
STK32A|protein_coding	-0.167842	0.499406	-3.60677	0.000347622	0.00798598	-0.198382
FAM47E|protein_coding	-0.103751	0.307802	-3.60671	0.000347698	0.00798598	-0.198584
GRB2|protein_coding	0.191135	4.78765	3.60438	0.00035074	0.00804637	-0.206561
LYAR|protein_coding	-0.243654	3.5923	-3.60151	0.000354515	0.00811426	-0.216361
NR1I2|protein_coding	-0.108032	0.266672	-3.60149	0.000354533	0.00811426	-0.216408
PAX5|protein_coding	0.0722997	0.0791533	3.60039	0.000355992	0.00813672	-0.220168
ABHD2|protein_coding	0.268836	2.62329	3.60012	0.00035635	0.00813672	-0.221087
NUP35|protein_coding	-0.204042	2.52843	-3.59976	0.000356833	0.00813822	-0.222329
CACHD1|protein_coding	-0.306022	2.54412	-3.59933	0.000357411	0.00814186	-0.223809
LAMP3|protein_coding	-0.529874	2.62341	-3.59813	0.000359008	0.0081687	-0.227892
CEACAM4|protein_coding	0.095596	0.175749	3.59768	0.000359615	0.00816931	-0.229437
KIAA0319|protein_coding	-0.176844	0.328516	-3.59741	0.000359969	0.00816931	-0.230339
RSPH1|protein_coding	-0.408035	1.69261	-3.59717	0.000360294	0.00816931	-0.231164
SPON2|protein_coding	0.396753	2.43146	3.59666	0.000360984	0.00817546	-0.232917
ARID3B|protein_coding	0.222784	1.31521	3.59093	0.000368768	0.00834203	-0.252442
BST2|protein_coding	-0.674862	8.29543	-3.59008	0.000369933	0.00835765	-0.255332
TRAF1|protein_coding	0.214685	1.43231	3.5898	0.000370316	0.00835765	-0.256278
ACTG1|protein_coding	0.323228	10.3616	3.58918	0.00037117	0.00836597	-0.258386
C1S|protein_coding	0.566187	4.791	3.58891	0.000371544	0.00836597	-0.259307
APLNR|protein_coding	0.357825	1.60527	3.58832	0.000372367	0.00837483	-0.261333
CYTH4|protein_coding	0.306356	1.47031	3.58767	0.000373262	0.00838296	-0.263528
KLRC4|protein_coding	0.0322579	0.0441485	3.58743	0.00037359	0.00838296	-0.264332
PEX6|protein_coding	-0.366903	3.92538	-3.58377	0.000378712	0.00848009	-0.276793
BMP1|protein_coding	0.319308	3.08432	3.58372	0.000378789	0.00848009	-0.276981
ACTA1|protein_coding	0.252235	0.396291	3.58327	0.000379416	0.00848438	-0.278494
PSPH|protein_coding	-0.279319	3.16802	-3.58209	0.000381083	0.00851187	-0.282504
SSX2IP|protein_coding	-0.209474	2.19463	-3.58137	0.000382104	0.0085249	-0.284952
CCDC149|protein_coding	-0.158063	1.36169	-3.5809	0.000382774	0.00853007	-0.286554
GAMT|protein_coding	0.446081	2.25226	3.57528	0.00039084	0.00869988	-0.305634
KIF9|protein_coding	-0.265535	1.61222	-3.57455	0.000391898	0.00871346	-0.308106
DHX58|protein_coding	-0.301574	2.2397	-3.5733	0.000393718	0.00874396	-0.312345
C2orf73|protein_coding	-0.165818	0.303845	-3.56959	0.000399166	0.00884941	-0.324915
DCDC2B|protein_coding	-0.16575	0.536947	-3.56945	0.000399375	0.00884941	-0.325394
RTL3|protein_coding	0.0590652	0.106044	3.568	0.000401522	0.00888686	-0.330296
UBXN10|protein_coding	-0.3738	2.12876	-3.56722	0.000402676	0.00889483	-0.332922
EVA1C|protein_coding	-0.469883	2.97866	-3.56714	0.000402795	0.00889483	-0.333192
APBB1IP|protein_coding	0.384235	1.8982	3.56528	0.000405579	0.00894616	-0.339491
ZP3|protein_coding	-0.373905	2.49904	-3.56437	0.000406955	0.00895126	-0.342588
SRGN|protein_coding	0.502509	5.58233	3.56423	0.000407158	0.00895126	-0.343045
ATP8B2|protein_coding	0.300401	2.20974	3.56421	0.000407196	0.00895126	-0.343129
CAPN6|protein_coding	0.588916	1.3126	3.56374	0.000407898	0.00895126	-0.344704
USP53|protein_coding	-0.479412	2.42976	-3.5636	0.000408108	0.00895126	-0.345175
EBNA1BP2|protein_coding	-0.221222	4.76446	-3.56288	0.000409196	0.00896502	-0.347609
GMFG|protein_coding	0.358181	2.48925	3.56165	0.000411059	0.00897965	-0.351763
SLC24A4|protein_coding	0.0126851	0.0304292	3.56129	0.000411608	0.00897965	-0.352983
AC008481|protein_coding	-0.181566	0.817151	-3.56106	0.000411962	0.00897965	-0.35377
PJVK|protein_coding	-0.140086	0.592893	-3.56099	0.000412071	0.00897965	-0.354011
LRP1|protein_coding	0.413931	3.71165	3.56092	0.000412169	0.00897965	-0.354228
AGO3|protein_coding	-0.153823	1.2338	-3.55987	0.000413777	0.00900461	-0.357789
BHLHA15|protein_coding	0.276863	1.00718	3.55769	0.000417129	0.00906744	-0.365166
HERPUD1|protein_coding	0.264973	4.32919	3.55735	0.000417649	0.00906862	-0.366305
TNFSF4|protein_coding	0.318905	1.1746	3.55611	0.000419569	0.00910016	-0.370498
CD209|protein_coding	0.2138	0.631037	3.55552	0.000420477	0.00910179	-0.372474
MFNG|protein_coding	0.280417	1.6067	3.55545	0.000420579	0.00910179	-0.372696
GREM1|protein_coding	0.27887	0.515929	3.55206	0.000425881	0.00920403	-0.384149
PSIP1|protein_coding	-0.312262	3.91518	-3.55182	0.000426248	0.00920403	-0.384936
LAPTM5|protein_coding	0.598356	4.84767	3.54948	0.000429943	0.00927353	-0.392826
PRR33|protein_coding	0.0778471	0.205043	3.54566	0.000436047	0.00939478	-0.405709
TUBG2|protein_coding	0.223646	2.50291	3.54117	0.000443306	0.00953422	-0.420796
ADAM15|protein_coding	-0.272691	4.61395	-3.54105	0.000443498	0.00953422	-0.421192
HSD17B13|protein_coding	-0.0811516	0.190673	-3.54015	0.000444971	0.00955534	-0.424223
BMP2|protein_coding	0.210999	0.507335	3.53651	0.000450975	0.00966664	-0.43647
TANK|protein_coding	-0.243627	3.43145	-3.5364	0.000451147	0.00966664	-0.436816
NDST1|protein_coding	0.316218	3.57248	3.5357	0.000452309	0.0096809	-0.439167
WEE2|protein_coding	-0.0309716	0.084822	-3.53523	0.000453099	0.00968717	-0.440762
RHCE|protein_coding	-0.257265	0.7904	-3.53428	0.000454672	0.00970443	-0.443928
SSTR4|protein_coding	0.0357065	0.0156516	3.53415	0.000454903	0.00970443	-0.444392
FHL3|protein_coding	0.301169	4.19728	3.53362	0.000455774	0.00971238	-0.44614
LBHD2|protein_coding	-0.496997	1.13726	-3.53161	0.00045915	0.00977362	-0.452881
SPATA12|protein_coding	-0.178231	0.635155	-3.52989	0.000462067	0.00982499	-0.458667
XAF1|protein_coding	-0.337951	1.64812	-3.52882	0.00046389	0.00984592	-0.462262
ATR|protein_coding	-0.109044	0.973146	-3.52871	0.000464063	0.00984592	-0.462603
ITGA4|protein_coding	0.184101	0.765315	3.52544	0.000469675	0.00994453	-0.473581
SYT8|protein_coding	0.401359	0.75667	3.5254	0.000469732	0.00994453	-0.473692
ZNF721|protein_coding	-0.198729	1.81353	-3.52429	0.000471659	0.00997448	-0.477431
CREB3L3|protein_coding	0.0280957	0.0239139	3.52388	0.000472359	0.00997845	-0.478786
TPP1|protein_coding	0.253766	4.3433	3.52087	0.000477598	0.0100782	-0.488858
USP1|protein_coding	-0.258414	4.10967	-3.52044	0.000478342	0.010083	-0.49028
FCER1G|protein_coding	0.523124	5.86363	3.51976	0.000479546	0.0100974	-0.492575
METTL11B|protein_coding	0.117432	0.194963	3.51905	0.000480796	0.0101128	-0.494952
HTR1B|protein_coding	0.0366317	0.0672815	3.51745	0.000483614	0.010159	-0.500288
IFI16|protein_coding	-0.445818	4.581	-3.51721	0.000484035	0.010159	-0.501084
PPIE|protein_coding	-0.214045	2.45733	-3.51222	0.000492954	0.010325	-0.517753
POR|protein_coding	-0.23945	4.63085	-3.51219	0.000493007	0.010325	-0.51785
RSBN1L|protein_coding	-0.202488	2.73931	-3.51168	0.000493918	0.0103289	-0.519536
RABGEF1|protein_coding	-0.160631	1.06798	-3.5115	0.000494249	0.0103289	-0.520148
OLFM2|protein_coding	0.601793	3.12332	3.51091	0.000495309	0.0103399	-0.522103
GAS1|protein_coding	0.555289	4.4558	3.50977	0.000497387	0.0103722	-0.525925
MKRN1|protein_coding	-0.184525	4.35482	-3.50836	0.000499939	0.0104142	-0.530596
TMPRSS3|protein_coding	-0.485824	4.02828	-3.50712	0.000502207	0.0104404	-0.534727
ROM1|protein_coding	-0.231909	1.30085	-3.50709	0.000502267	0.0104404	-0.534837
SPHK1|protein_coding	0.346833	1.54041	3.50663	0.000503109	0.0104467	-0.536365
LITAF|protein_coding	0.333781	4.61176	3.50603	0.000504225	0.0104588	-0.538387
TRIM14|protein_coding	-0.328567	3.1998	-3.50347	0.000508955	0.0105457	-0.54691
OVGP1|protein_coding	-0.925005	1.98195	-3.5029	0.000510012	0.0105504	-0.548802
AC010531|protein_coding	-0.118897	0.322169	-3.50276	0.000510269	0.0105504	-0.549263
TMEM150B|protein_coding	0.215144	0.813578	3.50165	0.00051234	0.010582	-0.552958
DNTTIP2|protein_coding	-0.156593	2.93164	-3.50133	0.000512936	0.0105831	-0.554019
BCL10|protein_coding	-0.194571	2.81474	-3.50086	0.000513806	0.0105898	-0.555566
STK10|protein_coding	0.210942	1.89424	3.50044	0.000514593	0.0105949	-0.556964
NEU4|protein_coding	-0.257505	0.696181	-3.49999	0.00051544	0.0106011	-0.558463
PARP9|protein_coding	-0.342864	3.54362	-3.49725	0.000520619	0.0106928	-0.567586
DACT1|protein_coding	0.26794	1.00278	3.497	0.000521088	0.0106928	-0.568408
EPHB6|protein_coding	-0.40105	3.04716	-3.49676	0.000521544	0.0106928	-0.569206
ZNF443|protein_coding	-0.310507	1.756	-3.49576	0.000523453	0.0107159	-0.572539
MPP2|protein_coding	0.214814	0.824647	3.49556	0.000523827	0.0107159	-0.573191
C11orf49|protein_coding	-0.205583	3.16162	-3.49509	0.000524722	0.0107159	-0.574749
PILRA|protein_coding	0.321523	2.68781	3.49501	0.000524871	0.0107159	-0.575008
LAMB1|protein_coding	0.330626	1.85113	3.49292	0.000528887	0.0107865	-0.581962
ARFGAP3|protein_coding	0.220492	3.28824	3.49209	0.000530473	0.0108076	-0.584694
SLC37A1|protein_coding	-0.266105	2.19232	-3.49168	0.000531276	0.0108126	-0.586073
RABGAP1L|protein_coding	-0.172211	1.57755	-3.48883	0.000536798	0.0109136	-0.595505
C5AR1|protein_coding	0.388135	2.56574	3.48593	0.00054248	0.0110105	-0.605109
ADAMTS7|protein_coding	0.316383	1.2995	3.48583	0.000542696	0.0110105	-0.605472
AC105052|protein_coding	-0.177136	0.617541	-3.48487	0.000544582	0.0110373	-0.608637
GLMN|protein_coding	-0.199779	1.9212	-3.48258	0.00054913	0.0110978	-0.616222
DPYS|protein_coding	0.0988613	0.108102	3.48256	0.000549163	0.0110978	-0.616277
C1QC|protein_coding	0.626935	6.8287	3.48251	0.000549275	0.0110978	-0.616463
TRIT1|protein_coding	-0.228753	2.45156	-3.482	0.000550288	0.011105	-0.618143
GPR75|protein_coding	-0.157859	0.765816	-3.48175	0.000550776	0.011105	-0.618952
THBD|protein_coding	0.333828	1.72755	3.48135	0.000551588	0.0111099	-0.620295
MN1|protein_coding	0.341111	1.15361	3.47944	0.000555411	0.0111753	-0.626593
BTK|protein_coding	0.231357	0.953991	3.47849	0.000557334	0.0111974	-0.629745
GNL2|protein_coding	-0.239094	3.68235	-3.47833	0.000557656	0.0111974	-0.630272
CBFA2T3|protein_coding	0.181573	0.463786	3.47687	0.000560606	0.011245	-0.635082
FPGT|protein_coding	-0.189806	2.04555	-3.47585	0.000562698	0.0112754	-0.638478
PLCH2|protein_coding	0.182902	0.343388	3.47362	0.000567255	0.011355	-0.645832
AGL|protein_coding	-0.177792	1.89484	-3.4731	0.000568332	0.0113649	-0.647562
TCTEX1D2|protein_coding	-0.301917	1.48969	-3.47278	0.000568986	0.0113663	-0.64861
ZFHX4|protein_coding	0.181303	0.413904	3.4703	0.000574116	0.011457	-0.656793
RBM15|protein_coding	-0.130006	1.71274	-3.46836	0.000578147	0.0115257	-0.66317
ADAMTS10|protein_coding	0.271412	1.12963	3.46799	0.000578921	0.0115293	-0.664389
CD38|protein_coding	0.289016	0.858618	3.46675	0.00058153	0.0115694	-0.668489
SLC22A5|protein_coding	-0.165207	1.15512	-3.46613	0.000582839	0.0115836	-0.670537
GYPC|protein_coding	0.386346	2.71274	3.46357	0.000588243	0.0116791	-0.678949
PIK3R6|protein_coding	0.136547	0.619173	3.46205	0.000591496	0.0117317	-0.683975
ITGAX|protein_coding	0.303259	1.58393	3.46074	0.000594302	0.0117754	-0.688289
MAIP1|protein_coding	-0.180614	3.45753	-3.45696	0.000602455	0.0119248	-0.700704
TCL1A|protein_coding	0.155046	0.156871	3.45625	0.000604001	0.0119433	-0.70304
CD1D|protein_coding	0.103741	0.414693	3.45279	0.000611569	0.0120807	-0.714384
TMEM59|protein_coding	-0.255431	5.16485	-3.45248	0.000612267	0.0120822	-0.715423
ACSL1|protein_coding	0.30775	2.46415	3.45141	0.000614618	0.0121163	-0.718915
SAMD9L|protein_coding	-0.384072	2.28733	-3.45087	0.00061582	0.0121179	-0.720695
SLC5A3|protein_coding	-0.296697	2.46778	-3.45066	0.000616277	0.0121179	-0.721371
C11orf91|protein_coding	-0.0641185	0.167672	-3.45054	0.000616564	0.0121179	-0.721795
GIMAP4|protein_coding	0.386812	2.92216	3.44947	0.000618932	0.0121522	-0.725286
ADRA2A|protein_coding	0.490262	1.85782	3.44867	0.000620728	0.0121751	-0.727926
CD72|protein_coding	0.211034	1.14933	3.44721	0.000623989	0.012212	-0.732698
ODF2L|protein_coding	-0.171852	1.70532	-3.44718	0.000624055	0.012212	-0.732795
TTC39A|protein_coding	-0.354244	1.48619	-3.44699	0.000624487	0.012212	-0.733425
ARHGAP31|protein_coding	0.22872	1.29314	3.44592	0.000626882	0.0122465	-0.736912
ATP6V1B2|protein_coding	0.21436	3.14284	3.44424	0.000630692	0.0123039	-0.742431
BRAF|protein_coding	-0.115456	1.30537	-3.44399	0.000631254	0.0123039	-0.743242
SEMA3C|protein_coding	0.386282	2.93238	3.44356	0.000632233	0.0123039	-0.744653
UBA7|protein_coding	-0.357426	3.91963	-3.44351	0.000632348	0.0123039	-0.744818
APOL4|protein_coding	0.434737	2.00121	3.44098	0.000638112	0.0124037	-0.753082
HTR7|protein_coding	0.059559	0.148196	3.43959	0.000641319	0.0124536	-0.757647
INO80D|protein_coding	-0.129675	1.25597	-3.43911	0.000642428	0.0124627	-0.759221
CBWD3|protein_coding	-0.0317632	0.141495	-3.43562	0.000650534	0.0126074	-0.770638
GEM|protein_coding	0.338213	1.39554	3.43485	0.000652317	0.0126178	-0.773129
CBWD1|protein_coding	-0.166416	0.976624	-3.43461	0.00065289	0.0126178	-0.773929
MUTYH|protein_coding	-0.0555226	0.278669	-3.43436	0.000653459	0.0126178	-0.774722
DBT|protein_coding	-0.159385	1.91909	-3.43428	0.000653664	0.0126178	-0.775007
CCDC69|protein_coding	0.278387	1.63425	3.43267	0.000657448	0.0126783	-0.780263
BAZ2B|protein_coding	-0.18901	1.392	-3.43103	0.00066131	0.0127402	-0.785595
LIMD1|protein_coding	-0.125533	1.24484	-3.42688	0.000671236	0.0129186	-0.799156
DAB2|protein_coding	0.321041	2.53859	3.42617	0.00067293	0.0129196	-0.80145
FOXO1|protein_coding	0.288568	2.64672	3.42604	0.000673243	0.0129196	-0.801874
RAB40B|protein_coding	-0.270033	2.22204	-3.42603	0.000673275	0.0129196	-0.801917
PLEKHG3|protein_coding	0.238279	2.67019	3.42568	0.000674106	0.0129228	-0.80304
FSTL1|protein_coding	0.437767	3.93611	3.42499	0.00067578	0.0129421	-0.805296
PTCH2|protein_coding	-0.244577	0.833573	-3.42332	0.000679821	0.0130068	-0.810723
HLA-DQA1|protein_coding	0.648569	3.59383	3.4226	0.000681585	0.0130277	-0.813082
RRP1|protein_coding	-0.212607	3.26105	-3.42207	0.00068289	0.0130398	-0.814821
CLEC4E|protein_coding	0.305166	0.861914	3.42159	0.000684044	0.0130491	-0.816359
MDH1B|protein_coding	-0.265506	1.4057	-3.42122	0.00068496	0.0130528	-0.817576
FKBP14|protein_coding	0.204933	1.63976	3.42077	0.000686061	0.0130528	-0.819038
SMPDL3A|protein_coding	0.259394	1.44413	3.4206	0.000686483	0.0130528	-0.819598
ATP6V1C2|protein_coding	-0.35242	1.27009	-3.42035	0.000687089	0.0130528	-0.8204
TMEM31|protein_coding	-0.159351	0.28037	-3.41997	0.00068803	0.0130528	-0.821646
HRH2|protein_coding	0.200889	0.765216	3.41988	0.000688259	0.0130528	-0.821949
AC131097|protein_coding	-0.176995	0.639257	-3.41862	0.000691361	0.0130989	-0.826041
FBLIM1|protein_coding	0.372384	3.7628	3.41588	0.000698156	0.0132148	-0.83494
LRRC8B|protein_coding	-0.17357	1.79196	-3.41447	0.000701683	0.0132686	-0.839525
TMEM234|protein_coding	-0.210827	1.94484	-3.40856	0.000716628	0.0135266	-0.858697
MAP4K4|protein_coding	0.258055	3.02044	3.40853	0.000716715	0.0135266	-0.858807
FAM200B|protein_coding	-0.196759	1.67441	-3.40813	0.000717738	0.0135328	-0.860104
UBL3|protein_coding	0.238634	3.32199	3.40751	0.000719311	0.0135493	-0.862095
PPP1R16A|protein_coding	-0.305114	4.15184	-3.40712	0.000720312	0.0135551	-0.86336
SYNPR|protein_coding	0.0644235	0.0633191	3.40678	0.0007212	0.0135587	-0.86448
CFAP53|protein_coding	-0.287314	1.31194	-3.40629	0.000722443	0.013569	-0.866048
TYW5|protein_coding	-0.104047	1.05881	-3.40569	0.000723997	0.0135851	-0.868001
EFCAB14|protein_coding	-0.218169	3.4305	-3.40491	0.000726	0.0136095	-0.870514
GLOD5|protein_coding	-0.346724	1.45789	-3.40437	0.000727418	0.013623	-0.872289
ASPN|protein_coding	0.506738	1.32873	3.40346	0.000729763	0.0136538	-0.875215
NAP1L3|protein_coding	0.24883	0.996541	3.40173	0.00073429	0.0137253	-0.88084
DUSP19|protein_coding	-0.173562	0.997228	-3.40083	0.000736637	0.0137533	-0.883742
CFAP298|protein_coding	-0.226786	1.66835	-3.40061	0.000737199	0.0137533	-0.884435
BABAM1|protein_coding	-0.286804	3.39824	-3.4002	0.000738284	0.0137603	-0.885773
VAMP5|protein_coding	0.352053	3.93559	3.39748	0.000745465	0.0138736	-0.894574
RABGGTB|protein_coding	-0.221652	2.98013	-3.39719	0.000746229	0.0138736	-0.895505
STAT5B|protein_coding	0.189903	2.65577	3.39709	0.000746499	0.0138736	-0.895835
MYCBP|protein_coding	-0.26681	3.25994	-3.39582	0.000749869	0.013923	-0.899929
URGCP|protein_coding	-0.162554	2.46634	-3.39403	0.000754651	0.0139973	-0.905709
MMACHC|protein_coding	-0.184091	2.18655	-3.39379	0.000755309	0.0139973	-0.906501
CCDC148|protein_coding	-0.119955	0.526611	-3.39162	0.000761157	0.0140882	-0.913512
UFSP1|protein_coding	-0.276474	2.14702	-3.39127	0.000762102	0.0140882	-0.91464
LILRA6|protein_coding	0.197449	0.754391	3.39116	0.000762383	0.0140882	-0.914975
TSHZ3|protein_coding	0.250276	1.06434	3.3906	0.000763908	0.014103	-0.916793
IL18BP|protein_coding	0.269554	2.08453	3.3899	0.000765809	0.0141247	-0.919051
METAP1D|protein_coding	-0.200651	1.53693	-3.38849	0.000769639	0.0141819	-0.923585
PSEN1|protein_coding	0.1576	3.01794	3.38801	0.000770956	0.0141927	-0.92514
PPCS|protein_coding	-0.233246	4.26282	-3.38748	0.000772402	0.0142059	-0.926843
SYNE3|protein_coding	0.109564	0.363904	3.38679	0.000774308	0.0142222	-0.929083
IQSEC1|protein_coding	0.233462	2.6641	3.38628	0.000775693	0.0142222	-0.930707
PIEZO2|protein_coding	0.141487	0.31713	3.38621	0.000775897	0.0142222	-0.930946
TBC1D2B|protein_coding	0.230412	1.9512	3.3861	0.000776205	0.0142222	-0.931307
FOXN3|protein_coding	0.198982	2.13224	3.38234	0.000786616	0.0143994	-0.943415
CHST15|protein_coding	0.384488	2.81679	3.38205	0.00078742	0.0144005	-0.944344
C3AR1|protein_coding	0.404002	2.2251	3.38024	0.000792498	0.0144798	-0.950185
RBMXL1|protein_coding	-0.214443	3.10782	-3.37913	0.000795608	0.0145215	-0.953744
ATP5IF1|protein_coding	-0.27177	5.87273	-3.37877	0.000796611	0.0145215	-0.954888
MAGEH1|protein_coding	0.339084	3.72455	3.37847	0.000797477	0.0145215	-0.955875
MGAT4B|protein_coding	-0.25512	5.22719	-3.37836	0.000797764	0.0145215	-0.956203
GJD3|protein_coding	0.103491	0.45394	3.37733	0.000800703	0.0145614	-0.959544
P3H1|protein_coding	0.270502	2.97848	3.37678	0.000802259	0.0145761	-0.961308
BATF|protein_coding	0.372559	1.60202	3.37585	0.000804884	0.0146102	-0.964275
IKBIP|protein_coding	0.206689	2.26717	3.37473	0.000808076	0.0146545	-0.967871
ARHGAP15|protein_coding	0.148606	0.571133	3.37379	0.000810765	0.0146896	-0.970889
UBXN11|protein_coding	-0.29258	3.29499	-3.37137	0.000817729	0.014802	-0.978659
ACE2|protein_coding	-0.0301487	0.0564945	-3.37071	0.000819657	0.0148231	-0.980798
TLR3|protein_coding	-0.259037	1.54933	-3.3698	0.00082229	0.0148459	-0.983711
IQCJ-SCHIP1|protein_coding	0.137824	0.59275	3.36975	0.000822445	0.0148459	-0.983882
HBD|protein_coding	0.0430607	0.0558118	3.36824	0.000826844	0.0149115	-0.988727
LRP5L|protein_coding	-0.16964	0.825633	-3.36742	0.000829237	0.0149408	-0.991352
ST6GALNAC6|protein_coding	-0.0341319	0.106076	-3.36667	0.000831418	0.0149663	-0.993737
MRPS18C|protein_coding	-0.163223	1.29423	-3.36614	0.000832982	0.0149754	-0.995444
HSPB7|protein_coding	0.317058	1.00619	3.36598	0.000833463	0.0149754	-0.995969
ADAMTSL5|protein_coding	0.17717	0.460283	3.36409	0.000839032	0.0150616	-1.00202
GDF6|protein_coding	0.136297	0.308775	3.3613	0.000847334	0.0151878	-1.01096
FTL|protein_coding	0.320461	11.5549	3.3612	0.000847621	0.0151878	-1.01126
CCDC194|protein_coding	-0.305809	0.836027	-3.36053	0.000849614	0.0152095	-1.0134
GTF2IRD2|protein_coding	-0.117113	0.593702	-3.35986	0.00085163	0.0152316	-1.01555
IQCC|protein_coding	-0.200234	1.69808	-3.35914	0.000853782	0.0152561	-1.01784
TMEM106A|protein_coding	0.173683	1.46212	3.35845	0.000855872	0.0152794	-1.02006
AL096870|protein_coding	-0.0308771	0.120729	-3.35759	0.000858477	0.0153111	-1.02282
SH3RF3|protein_coding	0.264788	1.19767	3.35734	0.000859222	0.0153111	-1.02361
CXorf38|protein_coding	-0.230429	2.55156	-3.35385	0.000869851	0.0154864	-1.03477
KIF27|protein_coding	-0.158412	1.07434	-3.35358	0.000870679	0.015487	-1.03563
RFLNA|protein_coding	0.381563	1.36996	3.3531	0.000872137	0.0154879	-1.03715
MORN1|protein_coding	-0.151276	1.02069	-3.35304	0.000872324	0.0154879	-1.03735
ZCCHC2|protein_coding	-0.181945	1.53434	-3.35275	0.000873227	0.0154898	-1.03828
EOGT|protein_coding	0.163807	1.43484	3.35058	0.000879895	0.0155939	-1.04519
PRDX1|protein_coding	-0.217367	6.89582	-3.35008	0.00088146	0.0156074	-1.0468
SYBU|protein_coding	-0.430159	1.82746	-3.34981	0.000882297	0.0156081	-1.04766
CYP4Z1|protein_coding	-0.259719	0.678828	-3.34934	0.00088374	0.0156194	-1.04915
FAM185A|protein_coding	-0.138066	1.54464	-3.34856	0.000886178	0.0156483	-1.05165
COL5A3|protein_coding	0.435725	1.578	3.34781	0.000888511	0.0156753	-1.05403
CTSW|protein_coding	0.426527	1.75835	3.34565	0.000895279	0.015767	-1.06092
DLX6|protein_coding	0.348792	0.549886	3.34563	0.000895326	0.015767	-1.06097
FAAH2|protein_coding	-0.283678	2.48933	-3.34509	0.000897044	0.0157829	-1.06271
TTLL10|protein_coding	-0.222639	0.630141	-3.34477	0.000898033	0.0157861	-1.06371
MALSU1|protein_coding	-0.243964	3.12426	-3.3432	0.000903007	0.0158592	-1.06872
ANKEF1|protein_coding	-0.185543	1.96842	-3.3409	0.000910331	0.0159734	-1.07605
SDHB|protein_coding	-0.216233	5.35648	-3.33936	0.000915241	0.0160451	-1.08093
PIP4K2A|protein_coding	0.237579	2.68889	3.33892	0.000916667	0.0160557	-1.08234
SPTLC3|protein_coding	-0.227587	1.5867	-3.33806	0.000919446	0.0160899	-1.08509
LRRC39|protein_coding	-0.107451	0.471107	-3.33636	0.000924912	0.0161708	-1.09047
SALL4|protein_coding	0.316068	1.04495	3.33611	0.000925731	0.0161708	-1.09127
NCDN|protein_coding	-0.233948	3.53599	-3.33483	0.000929879	0.0162287	-1.09532
AKAP13|protein_coding	0.189352	2.05468	3.33406	0.000932398	0.0162441	-1.09778
MAGEA4|protein_coding	0.64101	1.01606	3.33405	0.000932428	0.0162441	-1.09781
AC079447|protein_coding	-0.084548	0.405819	-3.33129	0.000941494	0.0163874	-1.10658
OMD|protein_coding	0.382072	0.780694	3.33029	0.000944784	0.01643	-1.10975
RPAP2|protein_coding	-0.135465	1.37927	-3.32923	0.000948284	0.0164761	-1.1131
SH2D3C|protein_coding	0.170483	1.47496	3.32841	0.000951021	0.016507	-1.11571
SLC12A8|protein_coding	0.316805	2.48448	3.32819	0.000951759	0.016507	-1.11642
RHBDD2|protein_coding	-0.278195	6.30302	-3.32669	0.000956764	0.0165737	-1.12117
FGF10|protein_coding	0.0939142	0.0769919	3.32653	0.000957302	0.0165737	-1.12168
RAPGEF6|protein_coding	-0.10613	0.833646	-3.326	0.000959053	0.0165801	-1.12334
PAK6|protein_coding	-0.234012	1.83087	-3.32591	0.000959375	0.0165801	-1.12365
TWIST2|protein_coding	0.43743	1.49107	3.3251	0.000962069	0.0166119	-1.12619
TMEM50A|protein_coding	-0.207976	5.5742	-3.32398	0.000965845	0.016646	-1.12974
GIMAP8|protein_coding	0.199083	0.984641	3.32395	0.000965939	0.016646	-1.12983
FDXACB1|protein_coding	-0.164501	0.950383	-3.32376	0.00096661	0.016646	-1.13046
SPI1|protein_coding	0.441247	3.95441	3.32321	0.000968444	0.0166629	-1.13218
CD163|protein_coding	0.451681	2.38216	3.32236	0.000971322	0.0166787	-1.13487
HHIP|protein_coding	0.0639386	0.132448	3.32236	0.000971336	0.0166787	-1.13488
FAM13A|protein_coding	-0.18115	1.299	-3.32218	0.000971934	0.0166787	-1.13544
MAK|protein_coding	-0.190558	0.810855	-3.31899	0.000982835	0.0168458	-1.14555
RNF4|protein_coding	-0.206317	3.7237	-3.31869	0.000983855	0.0168458	-1.14649
R3HDM4|protein_coding	0.213295	4.44386	3.31857	0.000984265	0.0168458	-1.14687
AC002310|protein_coding	-0.109013	0.676936	-3.31752	0.00098788	0.0168928	-1.15019
TRAM2|protein_coding	0.226219	2.85697	3.31694	0.000989886	0.0169123	-1.15203
ATXN7L1|protein_coding	-0.147004	1.32397	-3.31654	0.000991242	0.0169206	-1.15327
HDAC9|protein_coding	-0.237583	1.22082	-3.31516	0.000996016	0.0169872	-1.15763
PAPSS2|protein_coding	0.302125	1.89135	3.31294	0.00100378	0.0171047	-1.16467
TP53AIP1|protein_coding	-0.189563	0.367785	-3.31128	0.00100957	0.0171876	-1.16988
HAUS3|protein_coding	-0.125845	1.10768	-3.31104	0.00101041	0.0171876	-1.17064
KLF2|protein_coding	0.410324	2.88085	3.30979	0.00101484	0.0172406	-1.1746
RIF1|protein_coding	-0.148018	1.9561	-3.30966	0.0010153	0.0172406	-1.175
MOB3C|protein_coding	-0.232129	2.26642	-3.30876	0.00101846	0.0172793	-1.17782
LRP2BP|protein_coding	-0.139332	0.54336	-3.30667	0.0010259	0.0173894	-1.18442
CSN3|protein_coding	0.0218877	0.00755674	3.30644	0.00102674	0.0173894	-1.18516
ZBTB42|protein_coding	-0.320933	3.32174	-3.30546	0.00103024	0.0174335	-1.18824
DPH2|protein_coding	-0.216919	3.75069	-3.30442	0.00103396	0.0174778	-1.19151
C11orf65|protein_coding	-0.0784855	0.317639	-3.30423	0.00103465	0.0174778	-1.19211
CD14|protein_coding	0.510268	5.45298	3.30275	0.00103998	0.0175526	-1.19677
CCDC158|protein_coding	-0.04934	0.120911	-3.30243	0.00104113	0.0175567	-1.19777
ADRA1A|protein_coding	0.0209179	0.0185623	3.30111	0.00104593	0.0176224	-1.20193
CYP4X1|protein_coding	-0.524483	2.86284	-3.30065	0.00104761	0.0176354	-1.20339
ADORA2A|protein_coding	0.0134156	0.0326725	3.29995	0.00105013	0.0176628	-1.20557
KCNC4|protein_coding	-0.166603	0.820351	-3.29746	0.00105927	0.0178011	-1.21342
NSG1|protein_coding	-0.568655	3.46125	-3.29662	0.00106234	0.0178286	-1.21603
FCGR1A|protein_coding	0.293898	1.38745	3.29651	0.00106274	0.0178286	-1.21638
PROM1|protein_coding	-0.504303	1.31281	-3.29591	0.00106496	0.0178504	-1.21827
GPC6|protein_coding	0.345905	1.28023	3.29531	0.0010672	0.0178727	-1.22018
M1AP|protein_coding	-0.375612	2.0452	-3.29495	0.00106853	0.0178796	-1.2213
AP002495|protein_coding	-0.0996141	0.624134	-3.29469	0.00106949	0.0178802	-1.22211
MTTP|protein_coding	-0.0551918	0.121714	-3.29413	0.00107157	0.0178943	-1.22387
MAP3K11|protein_coding	-0.183739	3.76721	-3.29397	0.00107217	0.0178943	-1.22438
TMEM217|protein_coding	-0.109876	0.514862	-3.29311	0.00107534	0.0179301	-1.22706
SASH1|protein_coding	0.225049	1.83012	3.29274	0.00107672	0.0179301	-1.22822
TRMT13|protein_coding	-0.178266	1.93027	-3.29265	0.00107708	0.0179301	-1.22851
NAPEPLD|protein_coding	-0.215775	2.35615	-3.29151	0.00108135	0.0179858	-1.2321
ZNF560|protein_coding	-0.341178	0.643814	-3.29111	0.00108282	0.017995	-1.23333
PSORS1C1|protein_coding	-0.232224	0.969359	-3.29078	0.00108407	0.0180004	-1.23438
LTBP2|protein_coding	0.42104	4.04666	3.29003	0.00108688	0.0180316	-1.23672
HEG1|protein_coding	0.382642	2.70658	3.28943	0.00108914	0.0180517	-1.2386
ZNF644|protein_coding	-0.171998	2.91273	-3.28922	0.00108994	0.0180517	-1.23927
CTSH|protein_coding	0.285774	2.67377	3.28536	0.00110462	0.0182792	-1.25138
NSUN7|protein_coding	-0.188211	1.36246	-3.28416	0.0011092	0.0183395	-1.25513
FASTKD2|protein_coding	-0.150547	2.48484	-3.28321	0.00111285	0.0183842	-1.2581
CALD1|protein_coding	0.373506	4.34054	3.28273	0.00111468	0.0183989	-1.25959
CMYA5|protein_coding	-0.14437	0.43749	-3.28237	0.00111607	0.0184062	-1.26072
FAT1|protein_coding	0.353402	2.31934	3.28062	0.00112283	0.0184909	-1.26618
PEX10|protein_coding	-0.207561	2.92206	-3.28055	0.00112311	0.0184909	-1.2664
PKN2|protein_coding	-0.170345	2.9471	-3.27979	0.00112609	0.0185243	-1.2688
C1QTNF3|protein_coding	0.377102	1.46013	3.27953	0.00112707	0.0185249	-1.2696
PRRG4|protein_coding	-0.32855	2.5062	-3.27797	0.00113316	0.018585	-1.27447
OR4C6|protein_coding	0.0248031	0.0177691	3.27791	0.00113343	0.018585	-1.27469
EYA2|protein_coding	-0.643076	4.56838	-3.27778	0.0011339	0.018585	-1.27507
TWIST1|protein_coding	0.473116	2.0271	3.27762	0.00113455	0.018585	-1.27558
GLIS2|protein_coding	0.331154	3.59058	3.27656	0.00113871	0.0186376	-1.2789
ID4|protein_coding	-0.58148	5.31518	-3.27526	0.00114383	0.0187056	-1.28295
PRKAR1A|protein_coding	0.187299	4.3977	3.27461	0.00114638	0.0187228	-1.28497
GPR157|protein_coding	-0.306461	2.03069	-3.27451	0.0011468	0.0187228	-1.2853
ELAC1|protein_coding	-0.157262	1.26417	-3.27422	0.00114793	0.0187255	-1.28619
ANXA2|protein_coding	0.293431	5.7119	3.27393	0.00114909	0.0187287	-1.2871
HAVCR2|protein_coding	0.367793	2.26808	3.27351	0.00115076	0.0187382	-1.28842
CALHM6|protein_coding	0.340903	1.25483	3.2733	0.00115159	0.0187382	-1.28907
ARHGDIB|protein_coding	0.388705	5.07529	3.27276	0.00115374	0.0187574	-1.29076
GPBP1L1|protein_coding	-0.175142	4.1299	-3.27174	0.00115778	0.0188075	-1.29393
IL1RL2|protein_coding	-0.231599	1.0653	-3.27088	0.00116124	0.0188479	-1.29662
KLRD1|protein_coding	0.0679365	0.168394	3.27058	0.00116243	0.0188515	-1.29755
ZNF493|protein_coding	-0.181464	1.20703	-3.26947	0.00116689	0.0189082	-1.30102
TCP10L|protein_coding	-0.0126856	0.0383624	-3.26888	0.00116928	0.0189311	-1.30287
C2orf69|protein_coding	-0.184004	2.53647	-3.26787	0.00117336	0.0189813	-1.30601
ZBTB7C|protein_coding	-0.405943	3.29035	-3.26735	0.00117545	0.0189993	-1.30763
LTB|protein_coding	0.578637	2.49112	3.26686	0.00117741	0.0190153	-1.30914
FMO1|protein_coding	0.312639	0.957124	3.26644	0.00117913	0.0190272	-1.31045
CFAP70|protein_coding	-0.158511	0.546652	-3.26585	0.00118152	0.0190443	-1.31229
PLEKHO1|protein_coding	0.269061	3.02516	3.2657	0.00118214	0.0190443	-1.31276
PHACTR3|protein_coding	0.104897	0.226767	3.26453	0.00118691	0.0191053	-1.3164
LMOD1|protein_coding	0.327857	1.4785	3.26337	0.00119167	0.0191661	-1.32003
SP140|protein_coding	0.14596	0.508879	3.26193	0.00119758	0.0192452	-1.3245
TMED10|protein_coding	0.226272	6.13887	3.26155	0.00119915	0.0192547	-1.32569
PLD3|protein_coding	0.358009	6.0343	3.25718	0.00121727	0.0195179	-1.33925
FGF7|protein_coding	0.241846	0.569374	3.25706	0.00121777	0.0195179	-1.33962
FAM183A|protein_coding	-0.590688	1.85154	-3.25688	0.00121855	0.0195179	-1.3402
CRYZ|protein_coding	-0.266647	3.12662	-3.2564	0.00122056	0.0195339	-1.34169
PON2|protein_coding	-0.236707	4.35691	-3.25499	0.00122647	0.0196125	-1.34606
VSIG4|protein_coding	0.510983	3.46613	3.25329	0.00123363	0.0196949	-1.35132
ZNF736|protein_coding	-0.15391	1.46041	-3.25313	0.00123433	0.0196949	-1.35183
KCTD10|protein_coding	0.152272	2.79795	3.25305	0.00123466	0.0196949	-1.35207
DNAH7|protein_coding	-0.0852009	0.25849	-3.25068	0.00124475	0.0198395	-1.35943
NBEAL1|protein_coding	-0.0751043	0.477359	-3.25015	0.00124699	0.0198591	-1.36106
LIPT2|protein_coding	-0.250043	1.81684	-3.24991	0.00124804	0.0198595	-1.36182
CENPS|protein_coding	-0.178382	1.04995	-3.24856	0.0012538	0.0199349	-1.36598
ACOT11|protein_coding	-0.20266	1.12598	-3.2462	0.00126399	0.0200806	-1.3733
CHSY1|protein_coding	0.237084	3.02928	3.24572	0.00126609	0.0200976	-1.3748
LARGE2|protein_coding	-0.409574	4.33449	-3.24343	0.00127607	0.0202251	-1.3819
TTC39B|protein_coding	-0.198307	1.21412	-3.24339	0.00127621	0.0202251	-1.382
SNRNP40|protein_coding	-0.195589	3.64021	-3.24313	0.00127734	0.0202267	-1.3828
SCAMP5|protein_coding	0.285369	2.51232	3.24195	0.00128251	0.020292	-1.38645
TMEM62|protein_coding	-0.198798	1.6727	-3.24116	0.00128598	0.0203304	-1.38889
CIDEC|protein_coding	0.245343	0.322099	3.24053	0.00128879	0.0203582	-1.39086
NUP205|protein_coding	-0.200678	3.58664	-3.24009	0.00129073	0.0203724	-1.39222
C9orf135|protein_coding	-0.357022	0.830067	-3.23927	0.00129432	0.0203995	-1.39473
PLVAP|protein_coding	0.535681	3.75932	3.23922	0.00129454	0.0203995	-1.39489
P4HTM|protein_coding	-0.231733	3.27111	-3.23805	0.00129977	0.0204653	-1.39853
PARP14|protein_coding	-0.349683	3.60701	-3.23731	0.00130306	0.0205005	-1.40081
AGFG2|protein_coding	-0.281023	3.06503	-3.23707	0.00130413	0.0205008	-1.40155
PAG1|protein_coding	0.157374	0.923918	3.23566	0.0013104	0.0205828	-1.40589
PDGFB|protein_coding	0.28231	2.89479	3.23514	0.00131272	0.0205887	-1.40749
S100B|protein_coding	0.31135	0.850835	3.2351	0.00131289	0.0205887	-1.40761
LILRB5|protein_coding	0.128482	0.37089	3.23334	0.00132081	0.0206962	-1.41304
RBCK1|protein_coding	-0.221465	4.93861	-3.23299	0.0013224	0.0207044	-1.41412
TMEM231|protein_coding	-0.255453	2.11445	-3.23168	0.00132832	0.0207804	-1.41816
ILDR1|protein_coding	-0.244822	2.81093	-3.22907	0.00134022	0.0209276	-1.42622
BTG1|protein_coding	0.208982	4.09869	3.22899	0.00134059	0.0209276	-1.42646
PSMG4|protein_coding	-0.191896	1.34037	-3.22873	0.00134178	0.0209276	-1.42727
CAMTA1|protein_coding	-0.232769	2.7908	-3.2285	0.0013428	0.0209276	-1.42796
FPR3|protein_coding	0.462346	2.65434	3.22844	0.0013431	0.0209276	-1.42816
SSR3|protein_coding	0.191394	5.18825	3.2281	0.00134465	0.020935	-1.4292
KPNA6|protein_coding	-0.187222	3.91437	-3.22731	0.00134829	0.0209749	-1.43164
ARCN1|protein_coding	0.220628	5.53903	3.2263	0.00135291	0.0210301	-1.43473
PPP1R35|protein_coding	-0.252202	4.12823	-3.22577	0.00135538	0.0210484	-1.43637
ZMYM4|protein_coding	-0.18203	3.64419	-3.22558	0.00135625	0.0210484	-1.43696
ADAMTS4|protein_coding	0.238567	0.919069	3.22497	0.00135909	0.0210634	-1.43884
POP7|protein_coding	-0.200222	5.30323	-3.2249	0.00135938	0.0210634	-1.43904
MRGPRF|protein_coding	0.275018	1.47949	3.22318	0.00136741	0.0211675	-1.44436
ZNF114|protein_coding	0.184417	0.453131	3.22299	0.00136828	0.0211675	-1.44493
DHCR24|protein_coding	-0.415504	6.4349	-3.22214	0.00137224	0.021212	-1.44754
STARD8|protein_coding	0.153185	0.919251	3.21936	0.00138528	0.0213965	-1.45608
CLEC4C|protein_coding	0.0323871	0.054178	3.21905	0.00138674	0.0214022	-1.45703
KANK1|protein_coding	-0.256607	2.08164	-3.21874	0.00138821	0.0214079	-1.45799
EXPH5|protein_coding	-0.185677	1.13782	-3.21811	0.00139118	0.0214367	-1.45992
TAP2|protein_coding	-0.32108	2.44822	-3.21657	0.0013985	0.0215324	-1.46465
ANKMY1|protein_coding	-0.172765	1.15365	-3.21566	0.00140285	0.0215823	-1.46746
SHOX2|protein_coding	0.164458	0.288014	3.21523	0.00140486	0.0215963	-1.46875
CCDC189|protein_coding	-0.103099	0.496666	-3.2147	0.0014074	0.0216182	-1.47038
PDZRN3|protein_coding	0.310754	1.83829	3.21404	0.00141058	0.0216335	-1.47242
BCS1L|protein_coding	-0.180392	3.2616	-3.21403	0.00141061	0.0216335	-1.47244
THAP9|protein_coding	-0.129618	1.06291	-3.21294	0.00141586	0.0216969	-1.47579
TXN|protein_coding	-0.266639	7.05715	-3.21262	0.00141741	0.0217036	-1.47678
ZFYVE1|protein_coding	0.159069	2.37383	3.2122	0.00141939	0.0217167	-1.47804
CNOT4|protein_coding	-0.141627	2.63132	-3.21177	0.00142151	0.0217321	-1.47939
GET4|protein_coding	-0.117595	0.702152	-3.21151	0.00142275	0.021734	-1.48017
ALG14|protein_coding	-0.138848	1.08875	-3.21072	0.00142658	0.0217754	-1.4826
INPP5F|protein_coding	0.16813	1.81608	3.20995	0.00143028	0.0218148	-1.48494
EFNB2|protein_coding	0.399803	3.08826	3.20951	0.00143244	0.0218287	-1.4863
WDR4|protein_coding	-0.197286	2.37631	-3.20931	0.00143343	0.0218287	-1.48693
XPNPEP2|protein_coding	0.166793	0.178766	3.20895	0.00143515	0.0218379	-1.48801
VGLL2|protein_coding	0.0324388	0.0283439	3.20667	0.00144633	0.0219907	-1.49501
SLC7A11|protein_coding	-0.307866	1.26711	-3.20597	0.00144973	0.0220252	-1.49713
BTBD11|protein_coding	0.193671	0.50794	3.20402	0.00145934	0.0221377	-1.5031
TSHZ1|protein_coding	-0.252351	2.70055	-3.20383	0.0014603	0.0221377	-1.50368
CDK14|protein_coding	0.286644	2.24577	3.20372	0.00146083	0.0221377	-1.50401
TAPT1|protein_coding	-0.164482	1.78849	-3.20355	0.00146168	0.0221377	-1.50454
NUDT6|protein_coding	-0.094608	0.523972	-3.20315	0.00146365	0.0221503	-1.50575
SLC6A9|protein_coding	-0.315471	2.80328	-3.20067	0.001476	0.0223169	-1.51334
LSAMP|protein_coding	0.172049	0.426193	3.20048	0.00147695	0.0223169	-1.51391
IGF2|protein_coding	1.07615	2.90502	3.19953	0.00148171	0.0223714	-1.51682
DAPK3|protein_coding	0.187506	3.24184	3.19878	0.00148549	0.0224112	-1.51912
SPDEF|protein_coding	-0.697266	3.13916	-3.19831	0.00148785	0.022418	-1.52055
NAGA|protein_coding	0.203025	3.62427	3.19823	0.00148824	0.022418	-1.52079
LAMA4|protein_coding	0.297998	1.87088	3.19711	0.00149391	0.0224791	-1.52422
KIF26A|protein_coding	0.228261	0.54913	3.19697	0.00149461	0.0224791	-1.52464
MAN1A1|protein_coding	0.408262	2.50227	3.19534	0.00150287	0.0225802	-1.52961
RNF220|protein_coding	-0.146602	2.83215	-3.19519	0.00150365	0.0225802	-1.53008
ZADH2|protein_coding	-0.200947	2.34654	-3.19477	0.00150578	0.0225885	-1.53135
MFSD10|protein_coding	-0.249562	5.17205	-3.19462	0.00150652	0.0225885	-1.5318
AC126283|protein_coding	-0.12761	0.325469	-3.19427	0.00150834	0.0225984	-1.53289
FCGR2B|protein_coding	0.294118	1.23504	3.19238	0.00151797	0.0227252	-1.53863
ABCD3|protein_coding	-0.172455	2.49694	-3.19055	0.00152737	0.0228484	-1.54419
FBLN2|protein_coding	0.546427	2.83778	3.19021	0.00152915	0.0228575	-1.54525
FBXO36|protein_coding	-0.199448	1.3967	-3.18831	0.00153897	0.0229636	-1.55101
COL26A1|protein_coding	0.582559	1.90853	3.18826	0.00153927	0.0229636	-1.55119
ZNF483|protein_coding	-0.114757	0.54356	-3.18816	0.00153979	0.0229636	-1.5515
SF3A2|protein_coding	0.201944	5.4347	3.1872	0.00154475	0.02302	-1.5544
LIX1L|protein_coding	0.240608	2.54216	3.18611	0.00155047	0.0230875	-1.55773
ZNF771|protein_coding	-0.21398	2.12643	-3.1854	0.00155416	0.0231248	-1.55987
FGFRL1|protein_coding	-0.462431	5.48957	-3.18472	0.00155773	0.0231464	-1.56194
FADS1|protein_coding	0.328021	2.1088	3.18467	0.00155799	0.0231464	-1.56209
CILP|protein_coding	0.473501	1.86897	3.1814	0.00157526	0.0233852	-1.57203
ARL6|protein_coding	-0.175487	1.5264	-3.18092	0.00157783	0.0234055	-1.5735
AQP1|protein_coding	0.338004	2.99512	3.17954	0.00158519	0.0234795	-1.5777
IL1RL1|protein_coding	0.0657036	0.10086	3.17935	0.00158621	0.0234795	-1.57827
TBC1D10C|protein_coding	0.22861	1.35109	3.1793	0.00158644	0.0234795	-1.57841
CCR10|protein_coding	0.116317	0.405423	3.17863	0.00159002	0.0235049	-1.58044
ACR|protein_coding	-0.122039	0.359251	-3.17853	0.00159056	0.0235049	-1.58075
DAPL1|protein_coding	-0.849102	4.75998	-3.17751	0.00159605	0.023568	-1.58385
PKD2|protein_coding	0.205106	2.28974	3.17674	0.00160016	0.0236109	-1.58617
DUS4L|protein_coding	-0.127406	0.935249	-3.17383	0.00161592	0.0238253	-1.595
AL358075|protein_coding	-0.117081	0.354301	-3.17235	0.00162397	0.0239259	-1.59948
KIAA0319L|protein_coding	-0.206291	3.22431	-3.17153	0.00162848	0.0239742	-1.60198
SIRPA|protein_coding	0.357648	3.39241	3.17113	0.00163064	0.0239854	-1.60317
TNFAIP6|protein_coding	0.367928	1.62897	3.17094	0.0016317	0.0239854	-1.60376
SDC2|protein_coding	0.440431	3.26538	3.16977	0.00163812	0.0240616	-1.6073
CLU|protein_coding	-0.654216	8.08538	-3.16876	0.00164369	0.0241252	-1.61035
DDX31|protein_coding	-0.136517	1.94638	-3.16742	0.0016511	0.0242151	-1.61441
ESR1|protein_coding	-0.402058	3.07236	-3.16721	0.0016523	0.0242151	-1.61506
TSSK3|protein_coding	-0.112255	0.447152	-3.16544	0.00166214	0.0243409	-1.62041
DMAP1|protein_coding	-0.161592	3.14647	-3.1625	0.00167859	0.0245634	-1.62928
UNC5B|protein_coding	0.403232	3.57918	3.16224	0.00168008	0.0245668	-1.63008
RPF1|protein_coding	-0.176607	4.10808	-3.16165	0.00168338	0.0245876	-1.63185
DCST2|protein_coding	-0.175978	0.723834	-3.16154	0.00168403	0.0245876	-1.6322
MYMK|protein_coding	0.10217	0.148281	3.15832	0.00170231	0.0248358	-1.64192
CCDC7|protein_coding	-0.0654789	0.320972	-3.15735	0.0017078	0.0248864	-1.64482
BBS5|protein_coding	-0.175733	1.8386	-3.15726	0.00170833	0.0248864	-1.6451
HACD4|protein_coding	-0.193906	1.6233	-3.15645	0.00171294	0.0249345	-1.64753
TRIM38|protein_coding	-0.210103	2.79624	-3.15624	0.00171419	0.0249345	-1.64818
LRRC25|protein_coding	0.319212	2.06619	3.15543	0.00171881	0.0249831	-1.65061
CLCC1|protein_coding	-0.133189	1.74725	-3.1545	0.00172419	0.0249885	-1.65342
WIPF3|protein_coding	-0.26383	1.336	-3.15436	0.00172501	0.0249885	-1.65385
COG6|protein_coding	0.178345	1.94384	3.1543	0.00172536	0.0249885	-1.65403
DEPDC7|protein_coding	0.119045	0.54448	3.15428	0.00172546	0.0249885	-1.65408
NRP1|protein_coding	0.276415	2.23825	3.15426	0.0017256	0.0249885	-1.65416
HAUS6|protein_coding	-0.206121	2.08769	-3.15386	0.00172791	0.0250033	-1.65536
POLD2|protein_coding	-0.223639	5.25019	-3.1532	0.00173168	0.0250393	-1.65732
PHLDB1|protein_coding	0.227185	2.0272	3.1523	0.0017369	0.0250961	-1.66003
MTMR6|protein_coding	0.181819	2.29167	3.14656	0.00177057	0.0255228	-1.67732
SOD1|protein_coding	-0.221072	6.40912	-3.14641	0.00177146	0.0255228	-1.67777
CPNE5|protein_coding	0.246109	0.897461	3.14624	0.00177248	0.0255228	-1.67829
AGBL2|protein_coding	-0.163767	0.643839	-3.1459	0.00177448	0.0255228	-1.6793
LRFN4|protein_coding	-0.233765	3.5606	-3.14587	0.00177467	0.0255228	-1.6794
TNNC1|protein_coding	0.599918	2.15455	3.14561	0.00177617	0.0255228	-1.68016
PGLS|protein_coding	-0.273988	5.27047	-3.1455	0.00177682	0.0255228	-1.68049
SEMA5A|protein_coding	0.268876	1.15768	3.14549	0.00177691	0.0255228	-1.68054
WDSUB1|protein_coding	-0.19367	2.95634	-3.14512	0.00177908	0.025535	-1.68163
MRPS17|protein_coding	-0.157816	2.36507	-3.1442	0.0017846	0.0255755	-1.68442
FIGNL2|protein_coding	0.190042	0.546766	3.14415	0.00178487	0.0255755	-1.68456
GOLGA6L9|protein_coding	-0.204574	1.04462	-3.14399	0.00178583	0.0255755	-1.68504
MLYCD|protein_coding	-0.105741	0.825137	-3.14361	0.00178811	0.0255893	-1.68619
ERO1B|protein_coding	0.192771	1.14972	3.14269	0.00179359	0.0256489	-1.68894
TTC32|protein_coding	-0.244455	2.29555	-3.14069	0.00180561	0.0258018	-1.69495
SEMA4D|protein_coding	0.167419	1.98443	3.13937	0.00181355	0.0258963	-1.6989
ALDOC|protein_coding	0.411925	2.20245	3.13768	0.00182381	0.0260237	-1.70398
FAIM|protein_coding	-0.194855	2.2999	-3.13641	0.00183153	0.0261148	-1.70778
RAB37|protein_coding	0.0823514	0.2684	3.13577	0.00183546	0.0261516	-1.7097
TAGLN|protein_coding	0.515519	3.82378	3.13534	0.00183808	0.0261699	-1.71099
NOSTRIN|protein_coding	-0.122502	0.705481	-3.13509	0.00183961	0.0261724	-1.71174
CALHM5|protein_coding	0.120655	0.395793	3.13441	0.00184375	0.0262122	-1.71376
DCHS1|protein_coding	0.309807	1.42639	3.13346	0.00184961	0.0262727	-1.71662
NMUR1|protein_coding	0.120028	0.290689	3.13328	0.0018507	0.0262727	-1.71715
PPAT|protein_coding	-0.188031	2.4357	-3.13233	0.00185657	0.0263368	-1.71999
SSBP1|protein_coding	-0.230582	4.12933	-3.13177	0.00186001	0.026364	-1.72166
ZBTB1|protein_coding	0.145304	2.63716	3.13158	0.00186119	0.026364	-1.72223
IQGAP2|protein_coding	0.253347	1.41792	3.13056	0.00186755	0.0264348	-1.7253
SIMC1|protein_coding	-0.181002	2.5323	-3.12977	0.00187247	0.0264852	-1.72767
RNF183|protein_coding	-0.330622	1.39045	-3.12881	0.00187846	0.0265506	-1.73054
EHD2|protein_coding	0.417529	4.26999	3.12829	0.00188167	0.0265767	-1.73207
ARID5A|protein_coding	0.226187	2.89109	3.12568	0.00189809	0.0267891	-1.73988
CT62|protein_coding	-0.0784822	0.190838	-3.12459	0.00190493	0.0268663	-1.74312
NCKAP5|protein_coding	-0.107197	0.396059	-3.1243	0.00190676	0.0268676	-1.74399
DUSP3|protein_coding	0.195177	3.44369	3.12414	0.00190778	0.0268676	-1.74447
SYNE1|protein_coding	0.087611	0.439538	3.12292	0.00191555	0.0269574	-1.74812
KLHL15|protein_coding	-0.149669	1.52712	-3.12231	0.00191941	0.0269923	-1.74993
SNX32|protein_coding	-0.184541	0.802336	-3.12113	0.00192697	0.0270791	-1.75346
IL12RB1|protein_coding	0.181793	0.703427	3.1204	0.00193165	0.0271253	-1.75565
ZSCAN1|protein_coding	-0.272497	1.26546	-3.11937	0.00193825	0.0271984	-1.75871
HK3|protein_coding	0.226059	0.985727	3.11849	0.00194389	0.0272464	-1.76132
TCEA3|protein_coding	-0.375616	3.80835	-3.1184	0.00194448	0.0272464	-1.7616
AL033529|protein_coding	-0.00885588	0.0165789	-3.11816	0.00194604	0.0272488	-1.76232
C2orf50|protein_coding	-0.223082	0.740305	-3.11627	0.00195825	0.0274	-1.76794
SPAG16|protein_coding	-0.189927	1.50507	-3.11595	0.00196035	0.0274097	-1.7689
RBM28|protein_coding	-0.132022	1.70499	-3.11509	0.00196589	0.0274675	-1.77144
TRPV6|protein_coding	-0.130303	0.52168	-3.11478	0.00196797	0.0274768	-1.77239
ZDHHC13|protein_coding	-0.19698	2.49418	-3.11351	0.00197624	0.0275725	-1.77616
DDI2|protein_coding	-0.156178	1.87384	-3.11311	0.00197886	0.0275755	-1.77735
SELENBP1|protein_coding	-0.393732	5.13027	-3.11304	0.00197929	0.0275755	-1.77754
AC239799|protein_coding	-0.0245143	0.0734656	-3.11188	0.00198692	0.0276453	-1.78101
C2CD4B|protein_coding	-0.506748	1.75121	-3.11185	0.00198714	0.0276453	-1.7811
GABRQ|protein_coding	0.165919	0.250771	3.10967	0.00200153	0.0278087	-1.78759
CHST1|protein_coding	-0.462228	2.57694	-3.10964	0.00200174	0.0278087	-1.78768
CCZ1|protein_coding	-0.136221	1.13708	-3.10646	0.00202283	0.0280774	-1.7971
TNFRSF10C|protein_coding	0.125798	0.361916	3.1063	0.00202396	0.0280774	-1.7976
GRPEL1|protein_coding	-0.204345	3.09281	-3.10539	0.00203005	0.0281419	-1.8003
WIPI2|protein_coding	-0.178561	3.6321	-3.10508	0.00203214	0.0281508	-1.80122
KRIT1|protein_coding	-0.118254	1.13643	-3.10478	0.00203414	0.0281584	-1.80211
AC136428|protein_coding	0.0674597	0.0752209	3.10333	0.0020439	0.0282735	-1.80641
CSF2RA|protein_coding	0.263859	1.28106	3.10286	0.00204705	0.028297	-1.80779
PHOSPHO2|protein_coding	-0.175587	1.52502	-3.10241	0.00205009	0.0283189	-1.80913
GALNT1|protein_coding	0.261323	3.69573	3.10179	0.00205432	0.0283572	-1.81098
SRPX2|protein_coding	0.246868	1.23867	3.10123	0.00205811	0.0283893	-1.81263
KLHL23|protein_coding	-0.266425	2.34172	-3.10074	0.00206146	0.0284154	-1.81409
PPEF1|protein_coding	0.109853	0.224063	3.10006	0.00206607	0.0284478	-1.8161
PET117|protein_coding	-0.191446	0.915576	-3.09996	0.00206673	0.0284478	-1.81639
IFITM3|protein_coding	-0.329665	10.22	-3.09915	0.00207229	0.0285019	-1.8188
OSBPL9|protein_coding	-0.159001	3.28519	-3.09896	0.00207358	0.0285019	-1.81936
SLC15A2|protein_coding	-0.380969	1.95039	-3.0985	0.00207673	0.0285251	-1.82072
THY1|protein_coding	0.486607	4.12253	3.09715	0.00208597	0.0286175	-1.82471
GSTP1|protein_coding	-0.228403	8.64327	-3.09709	0.0020864	0.0286175	-1.82489
C1orf52|protein_coding	-0.165101	2.58892	-3.09657	0.00209	0.0286267	-1.82645
SUSD3|protein_coding	-0.479697	4.77498	-3.09657	0.00209001	0.0286267	-1.82645
HMGCL|protein_coding	-0.204332	2.8745	-3.0955	0.00209739	0.0286578	-1.82961
FOCAD|protein_coding	-0.204897	2.0632	-3.09521	0.00209939	0.0286578	-1.83047
NRROS|protein_coding	0.215593	1.69329	3.09509	0.00210018	0.0286578	-1.83081
SLC30A1|protein_coding	-0.208278	3.28067	-3.09508	0.00210027	0.0286578	-1.83085
C1orf105|protein_coding	0.0688363	0.0916387	3.09496	0.00210109	0.0286578	-1.8312
SHISAL1|protein_coding	0.194292	0.41216	3.09496	0.00210111	0.0286578	-1.8312
CD70|protein_coding	0.241133	0.540766	3.09463	0.00210339	0.0286688	-1.83218
CLEC2B|protein_coding	0.313269	1.71656	3.09401	0.00210769	0.0287073	-1.83401
ZBTB21|protein_coding	-0.1356	1.66552	-3.0933	0.00211264	0.028751	-1.83612
ACKR3|protein_coding	0.441481	3.58838	3.09312	0.00211385	0.028751	-1.83663
ZFAT|protein_coding	-0.170054	1.74649	-3.09283	0.00211587	0.0287584	-1.83749
UPP2|protein_coding	-0.0812195	0.234774	-3.09229	0.00211969	0.0287902	-1.83911
CFAP300|protein_coding	-0.3283	1.56925	-3.09191	0.00212233	0.0288059	-1.84023
EFHC2|protein_coding	-0.272879	1.23439	-3.09164	0.00212422	0.0288116	-1.84103
IL18|protein_coding	0.369933	2.63563	3.09077	0.00213026	0.0288734	-1.84358
GPX4|protein_coding	0.231198	7.187	3.09051	0.0021321	0.0288783	-1.84435
SCG2|protein_coding	0.346854	1.0011	3.08908	0.00214213	0.028994	-1.84857
RIMS2|protein_coding	-0.147941	0.276186	-3.08778	0.00215136	0.0290986	-1.85242
TACSTD2|protein_coding	-0.565765	7.0961	-3.08684	0.00215804	0.0291687	-1.85521
MTHFD2|protein_coding	-0.270174	3.09558	-3.08652	0.00216029	0.0291788	-1.85614
PLXND1|protein_coding	0.318106	3.53671	3.08606	0.00216354	0.0292025	-1.85749
AL451007|protein_coding	-0.10685	0.493168	-3.0857	0.00216611	0.0292049	-1.85856
PTGIR|protein_coding	0.172819	0.753729	3.08562	0.00216671	0.0292049	-1.85881
ST7|protein_coding	-0.17784	2.44373	-3.085	0.0021711	0.0292438	-1.86062
MATN3|protein_coding	0.239348	0.868071	3.08375	0.00218002	0.0293436	-1.8643
FGF18|protein_coding	0.539214	3.79532	3.08311	0.00218466	0.0293858	-1.86621
ZSCAN20|protein_coding	-0.104516	0.789346	-3.08211	0.00219178	0.0294612	-1.86913
FAM227B|protein_coding	-0.109658	0.649365	-3.07957	0.00221016	0.0296811	-1.87663
RASSF9|protein_coding	-0.288347	2.61878	-3.07943	0.00221119	0.0296811	-1.87704
TLR4|protein_coding	0.156814	0.702068	3.0783	0.00221939	0.0297707	-1.88036
GAS8|protein_coding	-0.155578	1.44157	-3.07777	0.00222328	0.0297925	-1.88194
UAP1L1|protein_coding	0.252492	1.87491	3.07761	0.0022244	0.0297925	-1.88239
SAMSN1|protein_coding	0.223134	1.07819	3.07745	0.0022256	0.0297925	-1.88287
SH3PXD2B|protein_coding	0.284657	3.03496	3.07529	0.00224144	0.0299838	-1.88923
MTPAP|protein_coding	-0.128268	2.04903	-3.0742	0.00224939	0.0300696	-1.89241
P2RY13|protein_coding	0.261513	0.984476	3.0724	0.00226273	0.0302271	-1.89772
CTPS2|protein_coding	-0.207818	2.85687	-3.07173	0.00226766	0.0302723	-1.89967
CFB|protein_coding	-0.410135	2.37089	-3.06936	0.00228535	0.0304829	-1.90664
TEC|protein_coding	-0.233556	1.70422	-3.0692	0.00228657	0.0304829	-1.90712
CTSS|protein_coding	0.426118	3.86467	3.06855	0.00229144	0.0305119	-1.90903
RALB|protein_coding	0.17986	4.43564	3.06849	0.00229188	0.0305119	-1.9092
CD180|protein_coding	0.1961	0.906573	3.06805	0.00229521	0.0305354	-1.9105
TEX44|protein_coding	-0.0249076	0.0386656	-3.06707	0.00230254	0.030612	-1.91336
HIC2|protein_coding	0.173345	1.15979	3.06619	0.0023092	0.0306797	-1.91595
DDA1|protein_coding	-0.221693	4.19758	-3.06458	0.00232134	0.0308199	-1.92066
PIM1|protein_coding	0.331246	3.98321	3.0641	0.00232501	0.0308476	-1.92207
CNR2|protein_coding	0.0211542	0.0348993	3.06282	0.00233475	0.0309557	-1.92582
ACCS|protein_coding	-0.217525	1.73748	-3.06207	0.00234053	0.0309866	-1.92803
TXNDC12|protein_coding	-0.15812	1.88807	-3.06203	0.00234079	0.0309866	-1.92814
PDGFC|protein_coding	0.260412	3.00369	3.0613	0.00234638	0.0309866	-1.93028
DNAJC3|protein_coding	0.1925	3.09784	3.06129	0.00234648	0.0309866	-1.93031
GPATCH3|protein_coding	-0.157718	2.42331	-3.06128	0.00234654	0.0309866	-1.93034
GLRX|protein_coding	0.232192	1.57834	3.06127	0.00234663	0.0309866	-1.93037
NLRP1|protein_coding	0.155914	0.595647	3.06064	0.00235147	0.0310264	-1.93222
AK2|protein_coding	-0.204097	4.20723	-3.06046	0.00235282	0.0310264	-1.93273
VPS13A|protein_coding	-0.103495	1.00342	-3.06007	0.0023558	0.0310446	-1.93387
ID3|protein_coding	0.391453	4.16295	3.05972	0.00235853	0.0310595	-1.9349
TNFRSF13C|protein_coding	0.185097	0.738303	3.05921	0.00236245	0.0310869	-1.93639
NDP|protein_coding	-0.483041	1.56157	-3.05904	0.0023638	0.0310869	-1.9369
MYL4|protein_coding	0.146921	0.242787	3.05862	0.00236704	0.0311085	-1.93813
FAM221A|protein_coding	-0.175455	1.2301	-3.05761	0.00237482	0.0311897	-1.94107
CHSY3|protein_coding	0.161505	0.557806	3.057	0.00237953	0.0312169	-1.94285
FAM3B|protein_coding	-0.444716	1.85017	-3.05693	0.00238009	0.0312169	-1.94306
MAGOH|protein_coding	-0.223623	4.97945	-3.05542	0.00239183	0.0313497	-1.94747
PIGG|protein_coding	-0.161564	1.98077	-3.05505	0.00239473	0.0313541	-1.94856
FMN2|protein_coding	0.0795786	0.121672	3.05497	0.00239539	0.0313541	-1.9488
CCDC188|protein_coding	-0.180392	0.578116	-3.05391	0.00240363	0.0314409	-1.95188
BCAP29|protein_coding	-0.039369	0.163697	-3.05367	0.00240549	0.0314441	-1.95258
HCAR3|protein_coding	0.0600959	0.118034	3.05285	0.00241192	0.0315071	-1.95497
BTC|protein_coding	-0.394998	2.26729	-3.05158	0.00242196	0.031617	-1.95869
LGALS1|protein_coding	0.396931	7.76427	3.05054	0.00243018	0.031703	-1.96173
VIM|protein_coding	0.37525	6.32439	3.0502	0.00243286	0.0317168	-1.96272
DPEP1|protein_coding	0.289813	0.637446	3.04986	0.00243554	0.0317271	-1.96371
TCF23|protein_coding	-0.211654	0.665541	-3.0495	0.00243839	0.0317271	-1.96475
MRPS15|protein_coding	-0.250862	5.04298	-3.04949	0.00243854	0.0317271	-1.96481
MFAP4|protein_coding	0.688517	3.81745	3.0491	0.00244162	0.0317459	-1.96594
LRRIQ3|protein_coding	-0.0726615	0.247231	-3.04821	0.00244868	0.0318165	-1.96852
ABCB4|protein_coding	0.0408501	0.125935	3.04794	0.00245081	0.0318229	-1.9693
TMEM167A|protein_coding	0.166891	3.85581	3.04773	0.00245251	0.0318238	-1.96993
PNP|protein_coding	0.302948	2.86838	3.04693	0.00245893	0.0318859	-1.97227
CCL21|protein_coding	0.666542	1.74939	3.04563	0.00246936	0.0319998	-1.97606
DKK2|protein_coding	0.21861	0.816008	3.045	0.00247438	0.0320293	-1.97788
CDS1|protein_coding	-0.26175	2.93696	-3.04493	0.00247493	0.0320293	-1.97808
AC098484|protein_coding	-0.0495739	0.239744	-3.04459	0.00247767	0.0320435	-1.97907
IRF7|protein_coding	-0.403338	4.17249	-3.04332	0.00248794	0.032155	-1.98277
ITM2C|protein_coding	0.582301	5.96712	3.04305	0.00249014	0.0321621	-1.98357
YES1|protein_coding	-0.202657	3.56841	-3.04025	0.00251284	0.0324338	-1.9917
COL8A2|protein_coding	0.404445	2.51046	3.03897	0.00252336	0.032548	-1.99544
ABCG2|protein_coding	-0.120189	0.550891	-3.03856	0.00252669	0.0325693	-1.99662
RASEF|protein_coding	-0.253519	1.70184	-3.03565	0.00255068	0.0328569	-2.00508
BMP4|protein_coding	0.406967	1.91195	3.03522	0.00255422	0.0328808	-2.00632
IFT74|protein_coding	-0.185244	1.60543	-3.03391	0.00256508	0.0329987	-2.01012
CABP7|protein_coding	-0.291102	0.577353	-3.03153	0.002585	0.033233	-2.01705
LST1|protein_coding	0.352794	2.13416	3.0307	0.0025919	0.0332998	-2.01944
AC027644|protein_coding	-0.0970194	0.505797	-3.02983	0.00259927	0.0333646	-2.02198
RLN1|protein_coding	-0.16752	0.442098	-3.0297	0.00260037	0.0333646	-2.02236
PTCD1|protein_coding	-0.104478	0.737133	-3.0294	0.00260285	0.0333685	-2.02321
CYP39A1|protein_coding	-0.210689	1.36658	-3.02925	0.0026041	0.0333685	-2.02364
SRGAP3|protein_coding	-0.227598	1.96462	-3.02881	0.00260783	0.0333745	-2.02492
RNF13|protein_coding	0.175491	3.56348	3.02879	0.002608	0.0333745	-2.02498
INPP5A|protein_coding	0.211618	2.68874	3.02758	0.00261823	0.0334834	-2.02848
ZCCHC17|protein_coding	-0.187864	4.12162	-3.02649	0.00262749	0.0335797	-2.03164
EED|protein_coding	-0.16994	2.1188	-3.02625	0.0026295	0.0335835	-2.03233
CASZ1|protein_coding	-0.188344	1.50392	-3.02464	0.00264326	0.0337371	-2.037
STPG1|protein_coding	-0.136175	1.32726	-3.02319	0.00265567	0.0338544	-2.04119
TTC27|protein_coding	-0.149729	2.73652	-3.02302	0.00265713	0.0338544	-2.04168
LSM4|protein_coding	-0.233637	5.94694	-3.02288	0.00265833	0.0338544	-2.04209
ERI3|protein_coding	-0.167605	5.37196	-3.02276	0.00265941	0.0338544	-2.04245
LHFPL2|protein_coding	0.227825	2.40729	3.0213	0.00267197	0.0339922	-2.04667
TTC4|protein_coding	-0.0589157	0.394637	-3.02067	0.00267739	0.0340378	-2.04848
ZNF394|protein_coding	-0.118261	1.94341	-3.02048	0.00267906	0.0340378	-2.04904
EIF3I|protein_coding	-0.186739	4.37252	-3.02023	0.00268118	0.0340426	-2.04975
KRCC1|protein_coding	-0.25859	4.30575	-3.01949	0.00268767	0.0341002	-2.05191
PEBP1|protein_coding	-0.207938	7.41502	-3.01931	0.00268922	0.0341002	-2.05243
GPSM3|protein_coding	0.359876	3.65023	3.01878	0.00269378	0.0341358	-2.05394
TIGD5|protein_coding	-0.247384	2.78441	-3.01745	0.00270539	0.0342606	-2.05779
MOCOS|protein_coding	-0.219877	1.13494	-3.01709	0.00270857	0.0342725	-2.05884
FCN1|protein_coding	0.211914	0.623537	3.01672	0.00271179	0.0342725	-2.05991
TEKT2|protein_coding	-0.415414	2.04987	-3.01663	0.00271258	0.0342725	-2.06017
PIP5KL1|protein_coding	-0.182317	1.22324	-3.01654	0.00271336	0.0342725	-2.06042
CORO2A|protein_coding	-0.267697	2.80839	-3.01594	0.00271864	0.0343	-2.06216
AC010132|protein_coding	-0.0129422	0.0443112	-3.01589	0.00271907	0.0343	-2.0623
ZNF630|protein_coding	-0.148109	0.951603	-3.01468	0.00272967	0.0344115	-2.06578
PDLIM7|protein_coding	0.293293	4.6521	3.0136	0.00273924	0.0344908	-2.06891
NLRC3|protein_coding	0.120084	0.655736	3.01357	0.0027395	0.0344908	-2.069
KCNMB2|protein_coding	-0.205628	0.61203	-3.01277	0.00274653	0.0345569	-2.07129
AC034102|protein_coding	-0.0509124	0.342324	-3.01248	0.00274907	0.0345579	-2.07212
ARPC1A|protein_coding	-0.242626	3.4157	-3.01236	0.00275015	0.0345579	-2.07247
MT1F|protein_coding	-0.501256	4.27749	-3.01164	0.0027566	0.0346166	-2.07457
RAVER2|protein_coding	-0.198819	2.05952	-3.01138	0.00275889	0.034623	-2.07531
RCE1|protein_coding	-0.166591	3.60235	-3.01061	0.00276573	0.0346864	-2.07752
MED26|protein_coding	-0.159925	1.67759	-3.01026	0.0027689	0.0347039	-2.07855
DIP2C|protein_coding	0.2074	1.71975	3.00993	0.0027718	0.0347179	-2.07948
HAPLN3|protein_coding	0.368069	3.12953	3.00936	0.00277692	0.0347596	-2.08113
OBP2A|protein_coding	-0.80249	2.4728	-3.00887	0.00278125	0.0347892	-2.08253
ARHGAP45|protein_coding	0.26036	2.05893	3.00869	0.00278285	0.0347892	-2.08304
PLPP1|protein_coding	0.219528	2.89821	3.00651	0.00280249	0.0350086	-2.08933
ERLEC1|protein_coding	0.153431	4.64766	3.00634	0.00280399	0.0350086	-2.08981
ATAD3B|protein_coding	-0.213067	1.97874	-3.00564	0.00281035	0.0350458	-2.09183
DOCK11|protein_coding	0.231617	1.1713	3.00561	0.00281058	0.0350458	-2.09191
AC106886|protein_coding	-0.0298085	0.102483	-3.00524	0.00281397	0.0350658	-2.09299
HTATIP2|protein_coding	-0.313105	3.18022	-3.005	0.00281613	0.0350701	-2.09367
GNAS|protein_coding	0.233013	6.99484	3.00436	0.00282193	0.0351007	-2.09551
GARNL3|protein_coding	-0.11179	0.668526	-3.00433	0.00282219	0.0351007	-2.09559
ANKRD23|protein_coding	-0.0625157	0.273097	-3.00373	0.00282767	0.0351465	-2.09733
GHRH|protein_coding	0.0689405	0.0526963	3.00328	0.00283179	0.0351753	-2.09863
AP1S2|protein_coding	0.271589	2.76866	3.00266	0.00283744	0.035223	-2.10041
RASGRF2|protein_coding	0.127217	0.565573	3.00189	0.00284444	0.0352873	-2.10262
RORC|protein_coding	-0.345532	1.90363	-3.00082	0.00285423	0.0353862	-2.10569
PAK3|protein_coding	0.111842	0.21273	2.9997	0.00286456	0.0354917	-2.10892
C2CD2|protein_coding	-0.181971	1.98173	-2.99908	0.00287024	0.0355396	-2.11069
PSTPIP2|protein_coding	0.292104	1.72054	2.99755	0.00288439	0.035692	-2.11508
FTCDNL1|protein_coding	-0.249715	1.8111	-2.99716	0.00288801	0.0357141	-2.1162
AC104389|protein_coding	-0.00708269	0.0205865	-2.99661	0.00289305	0.0357535	-2.11776
ZNF486|protein_coding	-0.435085	1.87978	-2.99642	0.00289486	0.0357535	-2.11832
TAF11L11|protein_coding	0.0355751	0.0132812	2.99383	0.00291899	0.0360286	-2.12574
ZSCAN31|protein_coding	-0.243987	2.08791	-2.99359	0.00292124	0.0360336	-2.12643
QRFPR|protein_coding	0.0594075	0.0313321	2.99255	0.00293105	0.0361316	-2.12942
ABR|protein_coding	0.252511	1.93377	2.99219	0.00293441	0.0361502	-2.13045
BRINP1|protein_coding	0.183765	0.349269	2.99142	0.00294171	0.0362172	-2.13267
TLR10|protein_coding	0.0884966	0.247368	2.99119	0.00294385	0.0362207	-2.13332
MMD|protein_coding	0.348818	2.79545	2.99006	0.00295447	0.0363285	-2.13654
SMAP2|protein_coding	0.214467	3.56258	2.98958	0.00295903	0.0363615	-2.13791
NXPE3|protein_coding	0.135359	0.886445	2.9893	0.00296175	0.036372	-2.13874
DNAH10|protein_coding	-0.0772328	0.199714	-2.98854	0.00296894	0.0364373	-2.1409
VEGFC|protein_coding	0.298704	1.83781	2.98772	0.00297677	0.0365104	-2.14325
KLHDC10|protein_coding	-0.1934	3.25094	-2.98567	0.00299638	0.0367153	-2.14912
HSPB9|protein_coding	-0.137756	0.463387	-2.98558	0.00299724	0.0367153	-2.14938
KRTAP19-1|protein_coding	0.021579	0.00813497	2.98474	0.00300529	0.0367907	-2.15177
MTCP1|protein_coding	-0.0932042	0.423908	-2.98235	0.00302829	0.0370306	-2.15858
GNB5|protein_coding	-0.13136	1.05827	-2.98231	0.00302869	0.0370306	-2.1587
ZNF763|protein_coding	-0.153891	0.794387	-2.98178	0.00303387	0.0370706	-2.16023
KIAA1841|protein_coding	-0.128301	0.987154	-2.98038	0.00304747	0.0372136	-2.16422
DOK6|protein_coding	0.0606887	0.171698	2.97994	0.00305175	0.0372425	-2.16548
PKIA|protein_coding	0.312678	1.10077	2.97956	0.00305547	0.0372645	-2.16656
AC092329|protein_coding	-0.0523933	0.270016	-2.97915	0.0030595	0.0372903	-2.16774
HDAC1|protein_coding	-0.203722	5.0531	-2.97776	0.00307306	0.0374321	-2.17169
UTP11|protein_coding	-0.178138	3.62053	-2.97716	0.00307892	0.0374801	-2.17339
KDM4A|protein_coding	-0.166724	2.55251	-2.97652	0.00308522	0.0375126	-2.17522
RP1|protein_coding	-0.112392	0.340073	-2.97645	0.00308595	0.0375126	-2.17543
FAM117B|protein_coding	-0.221551	2.50727	-2.97631	0.00308737	0.0375126	-2.17584
HGFAC|protein_coding	-0.227927	0.760908	-2.97597	0.00309072	0.0375299	-2.1768
METTL5|protein_coding	-0.175599	3.6727	-2.97525	0.00309776	0.0375919	-2.17884
MDH2|protein_coding	-0.183016	6.59393	-2.97305	0.00311959	0.0378332	-2.1851
CLEC1B|protein_coding	0.0276662	0.0472176	2.97259	0.00312416	0.0378651	-2.18641
MISP|protein_coding	0.399863	3.84684	2.97235	0.00312658	0.0378709	-2.1871
RFX3|protein_coding	-0.181448	1.36439	-2.97169	0.00313315	0.0379269	-2.18898
LGALS9C|protein_coding	-0.0355049	0.0832051	-2.97065	0.00314362	0.03803	-2.19195
CCRL2|protein_coding	0.149531	0.777817	2.97042	0.00314589	0.0380338	-2.1926
STIL|protein_coding	-0.20061	2.0015	-2.96998	0.00315032	0.0380638	-2.19386
VTN|protein_coding	0.183802	0.403546	2.96964	0.00315374	0.0380815	-2.19482
PASK|protein_coding	-0.165054	1.34765	-2.9694	0.00315614	0.0380869	-2.1955
SMYD1|protein_coding	0.0441475	0.0195956	2.9687	0.00316321	0.0381485	-2.1975
PLOD1|protein_coding	0.245674	4.91179	2.96833	0.00316696	0.0381701	-2.19856
NATD1|protein_coding	0.217461	2.09674	2.96665	0.00318387	0.0383502	-2.20331
GRK4|protein_coding	-0.120041	1.01048	-2.96613	0.00318921	0.0383907	-2.2048
NUMB|protein_coding	0.145858	2.88163	2.96516	0.00319908	0.0384858	-2.20756
RP1L1|protein_coding	-0.0290682	0.0541716	-2.96407	0.00321013	0.0385775	-2.21064
MYO1B|protein_coding	0.260628	2.04263	2.96393	0.00321159	0.0385775	-2.21105
TEX46|protein_coding	-0.0725859	0.196564	-2.96383	0.00321265	0.0385775	-2.21134
MRAS|protein_coding	0.264604	2.31995	2.96254	0.00322586	0.0386968	-2.215
CPSF4|protein_coding	-0.152805	2.85859	-2.96247	0.00322656	0.0386968	-2.21519
SLC22A4|protein_coding	-0.180358	0.889647	-2.96157	0.00323578	0.0387835	-2.21774
OXT|protein_coding	0.16089	0.505587	2.96122	0.00323934	0.0388023	-2.21872
SWSAP1|protein_coding	-0.2237	1.84759	-2.96086	0.00324308	0.0388233	-2.21975
IDUA|protein_coding	-0.274382	3.2974	-2.96066	0.00324516	0.0388243	-2.22032
SGCD|protein_coding	0.222175	0.937041	2.95978	0.00325419	0.0389085	-2.2228
HCN2|protein_coding	0.133482	0.484546	2.95872	0.00326525	0.0389983	-2.22583
CATSPER3|protein_coding	-0.0841245	0.342485	-2.95867	0.00326571	0.0389983	-2.22596
ADAMTS14|protein_coding	0.310389	1.38964	2.95784	0.00327437	0.0390777	-2.22832
MROH7|protein_coding	-0.0692909	0.174601	-2.95718	0.00328124	0.0391358	-2.23019
PRG2|protein_coding	-0.0141509	0.0205294	-2.95671	0.00328616	0.0391704	-2.23152
ZC3HAV1L|protein_coding	-0.214174	2.6222	-2.95534	0.00330046	0.0393168	-2.2354
PLPPR4|protein_coding	0.197009	0.640244	2.95447	0.0033096	0.0393777	-2.23786
TSPAN4|protein_coding	0.232844	2.99965	2.95447	0.00330961	0.0393777	-2.23787
CSF2|protein_coding	0.0710438	0.104258	2.95385	0.00331606	0.0394304	-2.2396
CPLANE2|protein_coding	-0.185987	1.91688	-2.95359	0.00331884	0.0394393	-2.24035
TMEM132A|protein_coding	0.325441	3.56131	2.95197	0.00333592	0.0396181	-2.24493
ADIPOQ|protein_coding	0.210669	0.231136	2.9512	0.0033441	0.0396686	-2.24711
RNF103|protein_coding	-0.137102	2.28501	-2.95119	0.00334425	0.0396686	-2.24715
AC092017|protein_coding	-0.161722	0.601697	-2.95001	0.00335673	0.0397757	-2.25047
CALB2|protein_coding	0.496089	1.75701	2.94995	0.00335735	0.0397757	-2.25064
CHPF|protein_coding	0.302635	5.77168	2.94919	0.00336544	0.0398473	-2.25278
WFDC8|protein_coding	-0.13446	0.294629	-2.94845	0.00337331	0.0399162	-2.25487
SF3A3|protein_coding	-0.170837	4.73016	-2.94821	0.00337589	0.0399224	-2.25555
CDHR1|protein_coding	-0.33163	1.07334	-2.94611	0.0033985	0.0401654	-2.2615
LARS2|protein_coding	-0.130974	1.66744	-2.94558	0.00340414	0.0402077	-2.26298
PCDHGC3|protein_coding	0.2699	1.59134	2.94517	0.0034086	0.040236	-2.26414
STXBP3|protein_coding	-0.150405	3.0235	-2.94453	0.00341554	0.0402935	-2.26596
TMEM69|protein_coding	-0.163065	5.12294	-2.94359	0.00342569	0.0403761	-2.2686
JMJD4|protein_coding	-0.143386	1.48933	-2.94349	0.00342678	0.0403761	-2.26888
NID1|protein_coding	0.332106	2.8287	2.9433	0.00342877	0.0403761	-2.2694
AL590764|protein_coding	0.0567212	0.187025	2.94147	0.00344877	0.0405871	-2.27459
KIFC3|protein_coding	0.203102	1.44413	2.94083	0.0034557	0.040636	-2.27638
COLEC10|protein_coding	-0.0610774	0.149212	-2.9407	0.0034571	0.040636	-2.27674
TUBA3D|protein_coding	-0.241898	0.768116	-2.93992	0.00346565	0.0406979	-2.27894
HEATR9|protein_coding	0.0210643	0.0602487	2.93978	0.00346724	0.0406979	-2.27935
HTRA3|protein_coding	0.436506	2.56027	2.93955	0.00346975	0.0406979	-2.27999
ZNF208|protein_coding	-0.177931	0.509929	-2.93945	0.00347085	0.0406979	-2.28027
ARRB2|protein_coding	0.179531	3.63286	2.93927	0.00347281	0.0406979	-2.28078
PLK2|protein_coding	0.360667	2.81658	2.93884	0.00347747	0.040728	-2.28197
FLNA|protein_coding	0.363883	6.69679	2.93851	0.00348114	0.0407465	-2.28291
NR2C2AP|protein_coding	-0.253381	3.80233	-2.93765	0.00349064	0.0408332	-2.28534
AUTS2|protein_coding	-0.18068	1.89582	-2.93637	0.00350471	0.040958	-2.28893
STOM|protein_coding	0.271446	4.46907	2.9363	0.00350551	0.040958	-2.28913
WDR49|protein_coding	-0.173929	0.411996	-2.93565	0.00351275	0.0410179	-2.29097
PSMA5|protein_coding	-0.190831	4.13452	-2.93474	0.00352288	0.0410798	-2.29353
SLC52A3|protein_coding	-0.199885	1.80401	-2.93464	0.00352396	0.0410798	-2.29381
SMIM4|protein_coding	-0.276439	2.59814	-2.9346	0.00352438	0.0410798	-2.29391
GCSH|protein_coding	-0.149584	0.670069	-2.93415	0.00352934	0.0410873	-2.29517
USP33|protein_coding	-0.155288	3.15706	-2.93396	0.00353153	0.0410873	-2.29572
RBBP7|protein_coding	-0.228485	4.38557	-2.93394	0.0035317	0.0410873	-2.29576
FKBP10|protein_coding	0.316316	5.34535	2.93379	0.00353346	0.0410873	-2.29621
ZBTB49|protein_coding	-0.128177	1.53983	-2.93277	0.00354475	0.041194	-2.29905
PCGF5|protein_coding	-0.180292	3.04103	-2.93199	0.00355358	0.0412136	-2.30126
CFAP57|protein_coding	-0.208235	0.558537	-2.93191	0.00355444	0.0412136	-2.30148
SAMD4A|protein_coding	0.142823	1.02395	2.93187	0.00355487	0.0412136	-2.30159
PRSS33|protein_coding	-0.687368	1.64725	-2.93187	0.0035549	0.0412136	-2.30159
PROX2|protein_coding	0.0269132	0.0828479	2.92979	0.00357826	0.0414597	-2.30743
SHISA5|protein_coding	-0.201947	5.80398	-2.92906	0.00358653	0.0415308	-2.30948
ERV3-1|protein_coding	-0.329047	2.46992	-2.92885	0.00358888	0.0415333	-2.31007
UROD|protein_coding	-0.184679	3.83031	-2.92773	0.00360154	0.0416319	-2.3132
DVL3|protein_coding	0.20786	5.27737	2.92763	0.00360274	0.0416319	-2.3135
GPR183|protein_coding	0.39433	2.41542	2.92753	0.00360381	0.0416319	-2.31376
KANSL1L|protein_coding	-0.126646	1.37046	-2.92683	0.00361182	0.0416997	-2.31574
WT1|protein_coding	-0.377524	4.67102	-2.92588	0.00362258	0.0417992	-2.31839
RAB5C|protein_coding	0.156668	4.10566	2.92551	0.00362679	0.041823	-2.31943
NOP16|protein_coding	-0.227559	3.05942	-2.92512	0.00363126	0.0418497	-2.32052
SYK|protein_coding	-0.285587	3.91707	-2.92399	0.00364424	0.0419745	-2.3237
VPS36|protein_coding	0.157865	2.41805	2.92158	0.00367196	0.0422535	-2.33045
NPHP1|protein_coding	-0.109674	0.685768	-2.92151	0.0036728	0.0422535	-2.33065
MDFIC|protein_coding	0.294671	1.93688	2.91926	0.00369881	0.0425276	-2.33693
AGTR1|protein_coding	0.123646	0.259608	2.91761	0.00371812	0.0427139	-2.34157
CYP26B1|protein_coding	0.249178	0.694195	2.9175	0.0037194	0.0427139	-2.34188
ABCB9|protein_coding	-0.148508	1.09239	-2.91708	0.00372427	0.0427446	-2.34304
SNAPC3|protein_coding	-0.175231	2.61854	-2.91405	0.00375991	0.0431282	-2.35152
ZNF408|protein_coding	-0.152957	2.88869	-2.91354	0.00376585	0.043171	-2.35292
RGL4|protein_coding	0.0265961	0.0855815	2.9118	0.00378652	0.0433824	-2.35779
MCRIP2|protein_coding	-0.258077	3.19923	-2.91129	0.00379254	0.0434258	-2.35921
RPEL1|protein_coding	-0.0215221	0.0890454	-2.91093	0.00379689	0.0434413	-2.36023
EAF2|protein_coding	0.175722	1.23919	2.9108	0.00379835	0.0434413	-2.36057
PDE4D|protein_coding	0.126279	0.625503	2.91026	0.00380479	0.0434834	-2.36208
ALG1L2|protein_coding	-0.1938	1.13133	-2.91012	0.0038065	0.0434834	-2.36248
ARHGAP18|protein_coding	0.199057	2.35905	2.90979	0.00381039	0.0434959	-2.36338
METTL21A|protein_coding	-0.182967	1.92467	-2.9095	0.00381387	0.0434959	-2.3642
CSTF3|protein_coding	-0.156045	2.91063	-2.90947	0.0038143	0.0434959	-2.3643
GAK|protein_coding	-0.178772	2.9101	-2.90924	0.00381707	0.0435021	-2.36494
C1orf210|protein_coding	-0.275564	4.10381	-2.90807	0.00383104	0.0436358	-2.36819
FPGS|protein_coding	-0.209676	4.60414	-2.90661	0.00384866	0.043798	-2.37228
SPRED1|protein_coding	0.194657	2.51228	2.90651	0.00384978	0.043798	-2.37254
PTGES2|protein_coding	-0.191963	3.41251	-2.90527	0.00386476	0.0439159	-2.37599
TMEM17|protein_coding	-0.14395	1.10905	-2.90518	0.00386593	0.0439159	-2.37626
OLFML3|protein_coding	0.390793	4.04212	2.90509	0.00386691	0.0439159	-2.37648
ZNF117|protein_coding	-0.235735	1.64967	-2.90383	0.00388222	0.044064	-2.38
RELCH|protein_coding	-0.153957	1.61056	-2.90355	0.00388562	0.0440648	-2.38078
SFXN3|protein_coding	0.231404	3.03396	2.90345	0.00388681	0.0440648	-2.38105
SLC35D3|protein_coding	0.149812	0.278169	2.90237	0.00390003	0.0441682	-2.38407
FKTN|protein_coding	-0.101156	1.09156	-2.90233	0.00390047	0.0441682	-2.38417
MYC|protein_coding	-0.390168	4.61439	-2.90211	0.00390321	0.0441737	-2.3848
CLDN4|protein_coding	-0.292922	6.67931	-2.90153	0.00391029	0.0441855	-2.38641
RAD9A|protein_coding	-0.178486	2.73415	-2.90141	0.00391175	0.0441855	-2.38674
PLCB2|protein_coding	0.232741	1.42712	2.9013	0.0039131	0.0441855	-2.38705
SPATA5L1|protein_coding	-0.159529	2.07906	-2.90128	0.00391333	0.0441855	-2.3871
APCDD1|protein_coding	0.355421	3.16388	2.9004	0.00392417	0.0442822	-2.38956
DLST|protein_coding	0.20233	4.22633	2.8988	0.00394385	0.0444785	-2.39401
AC008537|protein_coding	-0.0872422	0.444883	-2.89759	0.00395877	0.0446209	-2.39736
SMIM12|protein_coding	-0.165478	2.2502	-2.89724	0.00396303	0.0446332	-2.39832
SPICE1|protein_coding	-0.110178	0.732348	-2.89713	0.00396444	0.0446332	-2.39864
TANC2|protein_coding	0.180756	1.35236	2.89684	0.00396807	0.0446482	-2.39945
MRPS6|protein_coding	-0.23238	3.41502	-2.89535	0.00398658	0.0448306	-2.40359
ATG16L1|protein_coding	-0.136859	2.5205	-2.89482	0.00399313	0.0448784	-2.40505
GYPE|protein_coding	0.0341054	0.0785853	2.89448	0.00399742	0.0448923	-2.406
BUD23|protein_coding	-0.176021	3.66835	-2.89435	0.00399898	0.0448923	-2.40635
PIR|protein_coding	-0.30489	2.2137	-2.89411	0.00400197	0.0449	-2.40701
PKHD1L1|protein_coding	-0.38683	0.870972	-2.89391	0.00400446	0.0449021	-2.40757
DRC1|protein_coding	-0.300501	0.79083	-2.89222	0.00402563	0.0451135	-2.41225
GDF11|protein_coding	0.353326	2.4057	2.89188	0.0040299	0.0451354	-2.4132
CCHCR1|protein_coding	-0.221541	2.73986	-2.89045	0.004048	0.045312	-2.41718
COA7|protein_coding	-0.162065	2.85787	-2.88924	0.00406326	0.0454567	-2.42053
CATSPERE|protein_coding	-0.0774701	0.398151	-2.88806	0.00407816	0.0455854	-2.42378
SLC9A9|protein_coding	0.180257	1.03521	2.88796	0.00407945	0.0455854	-2.42406
SIPA1L2|protein_coding	0.230814	1.77292	2.88774	0.0040823	0.0455911	-2.42468
GSDMC|protein_coding	-0.293901	0.869185	-2.88698	0.00409198	0.0456693	-2.42678
C16orf71|protein_coding	-0.151259	0.653396	-2.88682	0.00409399	0.0456693	-2.42722
TNFSF10|protein_coding	-0.522091	4.96116	-2.886	0.00410451	0.0457315	-2.4295
USP43|protein_coding	-0.143327	1.31503	-2.88586	0.00410628	0.0457315	-2.42989
DNAJB9|protein_coding	0.201985	3.54249	2.88583	0.00410661	0.0457315	-2.42996
RIBC1|protein_coding	-0.259601	1.36399	-2.88539	0.00411228	0.0457685	-2.43118
INO80B|protein_coding	-0.081762	0.428002	-2.88514	0.00411544	0.0457775	-2.43186
SLC22A3|protein_coding	0.157151	0.350779	2.88414	0.00412829	0.0458942	-2.43463
SOX17|protein_coding	-0.337517	6.50251	-2.88168	0.00416008	0.0462213	-2.44145
AAMP|protein_coding	-0.14388	5.32917	-2.88016	0.00417977	0.0464043	-2.44564
EEF2|protein_coding	0.25266	8.97797	2.88004	0.00418131	0.0464043	-2.44597
LGI2|protein_coding	0.185284	0.654398	2.87909	0.00419363	0.0465144	-2.44859
FANCC|protein_coding	-0.114676	1.10446	-2.87869	0.00419886	0.0465459	-2.44969
TMEM60|protein_coding	-0.186711	4.66882	-2.87828	0.00420425	0.0465792	-2.45083
KBTBD3|protein_coding	-0.15421	1.17774	-2.87779	0.00421067	0.0466237	-2.45219
GJB1|protein_coding	-0.45681	2.61344	-2.87701	0.00422082	0.0466876	-2.45433
PIGV|protein_coding	-0.169776	2.06046	-2.87698	0.00422122	0.0466876	-2.45441
DUSP4|protein_coding	0.307528	1.35896	2.87645	0.00422826	0.0467317	-2.45589
HADH|protein_coding	-0.208647	2.63839	-2.87631	0.00423001	0.0467317	-2.45626
LILRA4|protein_coding	0.0635544	0.142427	2.87547	0.00424115	0.0468061	-2.45859
TTC21A|protein_coding	-0.166633	0.965944	-2.87543	0.00424155	0.0468061	-2.45868
CYP4F11|protein_coding	-0.357154	1.72812	-2.87471	0.00425115	0.0468854	-2.46068
DIS3L|protein_coding	-0.185331	2.83001	-2.8726	0.00427908	0.0471379	-2.4665
NAT8|protein_coding	-0.0386762	0.0927404	-2.87244	0.00428113	0.0471379	-2.46693
MORF4L1|protein_coding	0.173937	4.90531	2.87243	0.00428131	0.0471379	-2.46696
HPD|protein_coding	-0.279743	0.852127	-2.87194	0.00428775	0.0471517	-2.4683
SMTNL1|protein_coding	-0.251707	0.962627	-2.87188	0.00428859	0.0471517	-2.46847
PRELID3A|protein_coding	-0.190729	1.18846	-2.87179	0.00428982	0.0471517	-2.46873
FZD2|protein_coding	0.403735	2.94643	2.87145	0.00429438	0.0471752	-2.46967
NCF4|protein_coding	0.247065	1.65087	2.87027	0.00431006	0.0473208	-2.47291
EFCAB12|protein_coding	-0.189685	0.603012	-2.86992	0.00431477	0.0473458	-2.47388
NRDC|protein_coding	-0.146121	3.97204	-2.86958	0.0043193	0.0473565	-2.47481
CLDN11|protein_coding	0.321707	1.64251	2.86948	0.00432061	0.0473565	-2.47508
LUC7L2|protein_coding	-0.136927	2.8124	-2.86896	0.00432757	0.0474061	-2.47651
TMEM236|protein_coding	0.032343	0.0650599	2.86875	0.00433039	0.0474103	-2.47708
RSU1|protein_coding	0.199833	4.09369	2.86709	0.00435281	0.047629	-2.48167
ADI1|protein_coding	-0.191443	4.19956	-2.86662	0.00435905	0.0476387	-2.48294
GREM2|protein_coding	0.0834498	0.194533	2.8666	0.00435942	0.0476387	-2.48301
IMPDH1|protein_coding	-0.212044	3.83699	-2.86645	0.00436146	0.0476387	-2.48343
TSGA10|protein_coding	-0.131598	1.06047	-2.86629	0.0043635	0.0476387	-2.48385
SIX2|protein_coding	0.383709	1.07024	2.86612	0.00436592	0.0476387	-2.48434
AARD|protein_coding	-0.346545	1.39747	-2.86496	0.00438159	0.0477528	-2.48752
TBRG4|protein_coding	-0.160473	3.72526	-2.86488	0.00438272	0.0477528	-2.48775
SLC26A8|protein_coding	-0.0244782	0.0880883	-2.8648	0.00438373	0.0477528	-2.48795
HAUS8|protein_coding	-0.191042	1.75002	-2.86431	0.00439042	0.0477989	-2.4893
KLRC4-KLRK1|protein_coding	0.0108513	0.0168221	2.86333	0.00440369	0.0479165	-2.49198
SMOX|protein_coding	0.228079	2.40293	2.86235	0.00441716	0.0480364	-2.49469
ARHGEF1|protein_coding	0.204408	3.24776	2.86207	0.00442094	0.0480506	-2.49545
C9orf131|protein_coding	-0.0280168	0.0827083	-2.86134	0.00443093	0.0481323	-2.49746
CCDC96|protein_coding	-0.218873	0.960644	-2.85995	0.00444995	0.0482981	-2.50126
TRIM34|protein_coding	-0.0164119	0.0466159	-2.85982	0.00445179	0.0482981	-2.50162
ADAMTSL1|protein_coding	0.139884	0.427406	2.85969	0.00445363	0.0482981	-2.50199
TOMM34|protein_coding	-0.221107	5.56269	-2.85891	0.00446436	0.0483875	-2.50413
MAOB|protein_coding	-0.426571	2.54945	-2.85774	0.00448044	0.0485348	-2.50732
NPEPL1|protein_coding	-0.164058	1.35588	-2.85743	0.00448476	0.0485546	-2.50817
RASGEF1B|protein_coding	-0.222029	1.8123	-2.85315	0.00454448	0.0491738	-2.51991
CD1E|protein_coding	0.207467	0.4048	2.85254	0.00455297	0.0492126	-2.52156
TAF15|protein_coding	0.197272	3.73873	2.85253	0.00455312	0.0492126	-2.52159
NUP54|protein_coding	-0.186618	3.35503	-2.85133	0.00457001	0.0493677	-2.52487
GGT5|protein_coding	0.265323	1.69263	2.85086	0.00457672	0.0494128	-2.52618
IL5|protein_coding	-0.0178131	0.0471969	-2.84931	0.00459867	0.0496088	-2.53042
ARMC4|protein_coding	-0.147259	0.392017	-2.84921	0.00459996	0.0496088	-2.53067
ZFPL1|protein_coding	-0.133811	1.73868	-2.84897	0.00460336	0.049618	-2.53132
P3H3|protein_coding	0.344936	2.26083	2.84768	0.00462173	0.0497437	-2.53486
LAIR2|protein_coding	0.0690062	0.160721	2.84763	0.00462253	0.0497437	-2.53501
LTA|protein_coding	0.136178	0.500811	2.84761	0.00462269	0.0497437	-2.53504
ZNF683|protein_coding	0.275394	0.893627	2.84562	0.00465111	0.0499993	-2.54047
SEC16B|protein_coding	-0.0126294	0.0458914	-2.84559	0.00465158	0.0499993	-2.54056
CD86|protein_coding	0.296757	1.88069	2.84454	0.00466667	0.0501339	-2.54343
GABRA5|protein_coding	0.072593	0.125271	2.84427	0.00467048	0.0501472	-2.54416
R3HCC1|protein_coding	0.205942	3.14584	2.84404	0.00467383	0.0501555	-2.54479
HOXD8|protein_coding	-0.41403	2.6064	-2.84362	0.00467993	0.0501932	-2.54595
ELK3|protein_coding	0.225159	3.04501	2.8429	0.0046903	0.0502769	-2.54791
RORB|protein_coding	0.0493685	0.0928549	2.84272	0.00469291	0.0502771	-2.54841
CTIF|protein_coding	0.204697	2.09725	2.84187	0.00470524	0.0503815	-2.55073
CCND3|protein_coding	-0.229044	4.04513	-2.8413	0.00471347	0.0504419	-2.55228
ANKDD1B|protein_coding	-0.0710962	0.183761	-2.84095	0.00471847	0.0504677	-2.55322
IL36B|protein_coding	0.0145739	0.0165184	2.84043	0.004726	0.0505205	-2.55463
LEAP2|protein_coding	-0.13267	0.592791	-2.83969	0.00473682	0.0506084	-2.55666
CBLN4|protein_coding	0.0842416	0.204064	2.83931	0.00474234	0.0506316	-2.55769
TMEM215|protein_coding	0.144961	0.266666	2.83918	0.00474419	0.0506316	-2.55804
SNCG|protein_coding	-0.686929	5.38702	-2.83856	0.00475326	0.0507006	-2.55973
S100PBP|protein_coding	-0.139297	2.04942	-2.8383	0.00475705	0.0507132	-2.56044
SLC25A27|protein_coding	-0.248858	1.47869	-2.83741	0.00477016	0.0508252	-2.56288
TDO2|protein_coding	0.32341	1.09319	2.8363	0.0047864	0.0509309	-2.56589
MS4A7|protein_coding	0.284443	1.93835	2.83621	0.00478769	0.0509309	-2.56613
LAMTOR5|protein_coding	-0.21757	4.8292	-2.8362	0.00478793	0.0509309	-2.56617
KCNC3|protein_coding	0.339846	2.54755	2.836	0.00479076	0.0509332	-2.5667
RHBDL2|protein_coding	-0.219379	1.25815	-2.83564	0.00479618	0.050963	-2.5677
PMS1|protein_coding	-0.151865	2.2275	-2.8349	0.00480702	0.0510504	-2.5697
SOX5|protein_coding	-0.211407	1.09503	-2.83437	0.00481489	0.0510756	-2.57115
ECM2|protein_coding	0.231802	1.09946	2.83436	0.00481494	0.0510756	-2.57116
HEMK1|protein_coding	-0.12698	1.14578	-2.83421	0.00481727	0.0510756	-2.57159
RNF19B|protein_coding	-0.243619	4.22089	-2.83308	0.00483393	0.0512217	-2.57464
TTYH3|protein_coding	0.310666	4.70818	2.83292	0.0048363	0.0512217	-2.57508
ARPC5L|protein_coding	-0.19082	3.8284	-2.83217	0.00484751	0.0513124	-2.57713
CCDC78|protein_coding	-0.293888	1.23467	-2.83179	0.00485312	0.0513439	-2.57815
ZNF91|protein_coding	-0.17935	2.05072	-2.82929	0.00489047	0.051711	-2.58495
RELA|protein_coding	-0.141914	4.9754	-2.8274	0.00491885	0.0519828	-2.59007
FUNDC1|protein_coding	-0.214536	3.66709	-2.8271	0.00492334	0.0519896	-2.59088
PSAP|protein_coding	0.268367	8.66205	2.82701	0.00492482	0.0519896	-2.59115
GCC1|protein_coding	-0.131378	2.42159	-2.82657	0.00493135	0.0520303	-2.59232
ABI3|protein_coding	0.300289	2.31165	2.82637	0.00493443	0.0520346	-2.59287
ITGB3BP|protein_coding	-0.178033	1.96147	-2.82615	0.00493774	0.0520413	-2.59347
C4orf33|protein_coding	-0.163725	1.23535	-2.82536	0.00494974	0.0521396	-2.59562
GHR|protein_coding	0.150647	0.532196	2.82501	0.00495496	0.0521664	-2.59655
AVL9|protein_coding	-0.139413	2.16688	-2.82479	0.00495841	0.0521745	-2.59717
HPDL|protein_coding	-0.304189	2.40798	-2.82408	0.00496916	0.0522593	-2.59908
ARSH|protein_coding	-0.123684	0.332003	-2.82264	0.00499104	0.0524612	-2.60297
UCP1|protein_coding	-0.0843346	0.17704	-2.82209	0.00499948	0.0525215	-2.60447
B3GALNT2|protein_coding	-0.118931	1.54002	-2.82136	0.0050106	0.05261	-2.60644
HELZ|protein_coding	0.131842	2.02762	2.82094	0.00501711	0.0526472	-2.60759
APIP|protein_coding	-0.157959	2.16329	-2.82078	0.00501955	0.0526472	-2.60802
SAMD12|protein_coding	-0.179329	1.58447	-2.82042	0.00502507	0.0526767	-2.60899
MEF2D|protein_coding	0.158576	3.7973	2.8202	0.00502843	0.0526836	-2.60958
ZMYM1|protein_coding	-0.150331	1.6861	-2.81988	0.00503339	0.0527	-2.61045
DLG4|protein_coding	0.19397	1.55085	2.81975	0.00503541	0.0527	-2.61081
NEXN|protein_coding	0.242994	1.35591	2.81939	0.00504099	0.0527281	-2.61179
TCN2|protein_coding	0.339753	3.17717	2.81922	0.00504351	0.0527281	-2.61223
TMEM134|protein_coding	-0.200631	3.36941	-2.81895	0.00504776	0.0527442	-2.61298
TMC1|protein_coding	-0.098431	0.246732	-2.81868	0.00505183	0.0527584	-2.61369
NDUFB2|protein_coding	-0.25546	3.56792	-2.81732	0.00507291	0.0529502	-2.61738
APOE|protein_coding	0.420424	6.97675	2.81603	0.00509289	0.0531302	-2.62086
ITGAE|protein_coding	0.16649	1.44099	2.81533	0.00510387	0.0532163	-2.62277
CLDN6|protein_coding	0.905661	4.57409	2.8125	0.00514807	0.0536484	-2.6304
ST13|protein_coding	0.166557	5.97617	2.81207	0.00515489	0.0536622	-2.63157
BCL2L15|protein_coding	-0.166872	0.399435	-2.81207	0.0051549	0.0536622	-2.63157
MIGA1|protein_coding	-0.118349	1.59404	-2.81178	0.00515941	0.0536628	-2.63234
ZMYND12|protein_coding	-0.270631	2.10983	-2.81171	0.00516047	0.0536628	-2.63252
GGCT|protein_coding	-0.230293	3.81205	-2.81099	0.00517192	0.0537532	-2.63449
PIK3CG|protein_coding	0.152858	0.743174	2.8101	0.00518598	0.0538706	-2.63689
ADCK2|protein_coding	-0.200982	3.60274	-2.80984	0.00518999	0.0538805	-2.63757
CSF1R|protein_coding	0.430373	3.45051	2.80964	0.00519318	0.0538805	-2.63812
GRSF1|protein_coding	-0.171669	3.76503	-2.80951	0.00519523	0.0538805	-2.63847
ADCY2|protein_coding	0.0756073	0.105781	2.80927	0.00519899	0.0538907	-2.6391
EIF2B4|protein_coding	-0.125545	2.84058	-2.80903	0.00520293	0.0539029	-2.63978
QDPR|protein_coding	-0.194844	3.35451	-2.80795	0.00521999	0.0540509	-2.64267
PEX16|protein_coding	-0.176454	3.27623	-2.80727	0.00523084	0.0541058	-2.64451
COL25A1|protein_coding	0.203457	0.417663	2.80727	0.00523085	0.0541058	-2.64451
CARF|protein_coding	-0.100163	0.914845	-2.80684	0.00523764	0.0541473	-2.64566
ABI2|protein_coding	-0.148186	2.06982	-2.8063	0.00524626	0.0542077	-2.64711
CYP1B1|protein_coding	0.373584	2.04613	2.80606	0.00525017	0.0542193	-2.64777
SUMO1|protein_coding	-0.148644	5.82438	-2.80561	0.0052573	0.0542381	-2.64897
CDR2|protein_coding	0.148884	2.2974	2.8056	0.00525756	0.0542381	-2.64902
DNAAF4|protein_coding	-0.122968	0.584499	-2.80504	0.00526654	0.054284	-2.65053
PLA2G2A|protein_coding	0.48666	1.23503	2.80497	0.00526759	0.054284	-2.6507
CCSER1|protein_coding	-0.0752453	0.313815	-2.80447	0.00527555	0.0543373	-2.65204
ARFGAP2|protein_coding	-0.140776	3.69158	-2.80425	0.00527917	0.0543459	-2.65265
MED30|protein_coding	-0.216478	4.02346	-2.80374	0.00528739	0.0544017	-2.65402
GFAP|protein_coding	0.227181	0.276431	2.8035	0.00529119	0.054412	-2.65466
DNHD1|protein_coding	-0.135959	0.70625	-2.803	0.0052992	0.0544657	-2.65599
NSG2|protein_coding	0.0363699	0.0261786	2.8027	0.00530409	0.0544853	-2.65681
ENTPD4|protein_coding	0.149439	2.29346	2.8025	0.00530733	0.0544853	-2.65735
TSPAN17|protein_coding	-0.170707	3.54762	-2.80232	0.00531022	0.0544853	-2.65783
MRC2|protein_coding	0.339068	3.85566	2.80202	0.00531502	0.0544853	-2.65863
TNFSF12|protein_coding	0.218024	2.67109	2.80202	0.00531509	0.0544853	-2.65864
AC025287|protein_coding	-0.0627558	0.254621	-2.8009	0.00533328	0.0546256	-2.66166
PPY|protein_coding	0.0549697	0.03375	2.80072	0.00533614	0.0546256	-2.66214
KCTD17|protein_coding	0.214623	2.45435	2.80066	0.00533719	0.0546256	-2.66231
ADAMTS9|protein_coding	0.301308	1.47504	2.80036	0.00534204	0.054646	-2.66312
ANKAR|protein_coding	-0.0829013	0.586809	-2.80019	0.0053448	0.054646	-2.66357
PTPMT1|protein_coding	-0.137418	1.31379	-2.79988	0.00534973	0.0546475	-2.66439
PCBD2|protein_coding	-0.140618	1.45184	-2.79983	0.00535055	0.0546475	-2.66452
HEXB|protein_coding	0.179948	3.68778	2.79955	0.00535524	0.0546666	-2.6653
TNIP2|protein_coding	-0.176164	3.68334	-2.79935	0.00535836	0.0546699	-2.66581
MAL|protein_coding	0.751207	4.86222	2.79912	0.00536221	0.0546805	-2.66645
SH2B3|protein_coding	0.224515	2.44823	2.7983	0.0053756	0.0547884	-2.66865
LRTM1|protein_coding	0.0593262	0.0340595	2.79775	0.00538461	0.0548515	-2.67013
ETFBKMT|protein_coding	-0.101218	0.797897	-2.79742	0.00538995	0.0548771	-2.67101
KCTD20|protein_coding	0.18695	3.21459	2.79708	0.00539549	0.0549049	-2.67192
FAM53A|protein_coding	-0.118366	0.703957	-2.79627	0.00540871	0.0550107	-2.67408
TMEM53|protein_coding	-0.186061	2.1678	-2.79547	0.00542195	0.0550995	-2.67624
GNA13|protein_coding	0.162458	3.56491	2.7954	0.0054231	0.0550995	-2.67643
TYROBP|protein_coding	0.411272	6.34916	2.79484	0.00543228	0.0551265	-2.67793
C7orf61|protein_coding	-0.167481	0.613664	-2.79482	0.00543263	0.0551265	-2.67798
FAM184B|protein_coding	-0.0210093	0.0873146	-2.79472	0.00543425	0.0551265	-2.67825
HS3ST1|protein_coding	-0.185363	1.08668	-2.79428	0.00544163	0.0551726	-2.67945
IAH1|protein_coding	-0.196397	2.66995	-2.79383	0.00544907	0.0552193	-2.68065
PALM|protein_coding	0.384438	3.44805	2.7933	0.00545777	0.0552787	-2.68206
SCML4|protein_coding	0.066022	0.105714	2.79267	0.00546815	0.0553392	-2.68374
MAPRE1|protein_coding	0.163845	5.7834	2.7926	0.00546943	0.0553392	-2.68395
OBP2B|protein_coding	-0.508116	1.38398	-2.79194	0.00548029	0.0554204	-2.6857
EFHB|protein_coding	-0.165878	0.471362	-2.79173	0.00548376	0.0554267	-2.68626
AP2M1|protein_coding	0.190227	6.88747	2.79145	0.00548846	0.0554454	-2.68702
CDC42SE1|protein_coding	0.176095	4.55819	2.79025	0.00550843	0.0556183	-2.69023
CPA3|protein_coding	0.19487	0.438003	2.78989	0.00551452	0.0556193	-2.69121
DLG3|protein_coding	-0.154724	2.7109	-2.78987	0.0055149	0.0556193	-2.69127
ZNF665|protein_coding	-0.0869883	0.673875	-2.78973	0.00551709	0.0556193	-2.69162
IRF6|protein_coding	-0.223752	3.68348	-2.78951	0.00552081	0.0556279	-2.69221
ATG2A|protein_coding	-0.174729	3.14596	-2.78763	0.00555235	0.0558903	-2.69725
LIPT1|protein_coding	-0.154507	1.90652	-2.78762	0.00555258	0.0558903	-2.69729
DSE|protein_coding	0.131243	0.996121	2.78715	0.00556043	0.0559403	-2.69853
LGMN|protein_coding	0.233598	4.77715	2.78648	0.00557179	0.0560257	-2.70034
ENPP1|protein_coding	0.218062	0.973732	2.78527	0.00559227	0.0562027	-2.70358
TFF2|protein_coding	-0.363938	0.806711	-2.7849	0.00559853	0.0562063	-2.70457
POLE4|protein_coding	-0.229832	3.77234	-2.78487	0.00559902	0.0562063	-2.70464
ENTPD1|protein_coding	0.0998732	1.08023	2.78473	0.0056013	0.0562063	-2.705
NSF|protein_coding	0.160325	2.94352	2.78416	0.00561109	0.0562756	-2.70655
UBQLNL|protein_coding	-0.101766	0.360561	-2.78198	0.00564808	0.0566174	-2.71235
PLEKHN1|protein_coding	-0.219341	1.14779	-2.78159	0.00565483	0.0566559	-2.71341
DNAH11|protein_coding	-0.0752022	0.201676	-2.78099	0.00566512	0.0567299	-2.71501
C9orf43|protein_coding	-0.104513	0.58377	-2.78046	0.00567418	0.0567745	-2.71642
WDR92|protein_coding	-0.120977	1.37121	-2.78039	0.00567541	0.0567745	-2.71662
IFI35|protein_coding	-0.32651	4.03667	-2.77782	0.00571956	0.0571868	-2.72346
PALMD|protein_coding	-0.290374	1.87388	-2.77732	0.00572823	0.057218	-2.7248
GIMAP1|protein_coding	0.124756	0.648235	2.7773	0.00572856	0.057218	-2.72485
MIGA2|protein_coding	-0.162902	2.25518	-2.77712	0.00573167	0.0572198	-2.72533
TIGD4|protein_coding	-0.109781	0.624807	-2.77547	0.00576042	0.0574715	-2.72975
USP22|protein_coding	0.243214	4.25007	2.77533	0.00576279	0.0574715	-2.73011
B3GLCT|protein_coding	0.15557	1.5501	2.77455	0.0057763	0.0575768	-2.73218
SNX13|protein_coding	-0.122974	1.53373	-2.77422	0.00578204	0.0576045	-2.73305
PLSCR4|protein_coding	-0.314142	2.66139	-2.77387	0.0057882	0.0576099	-2.73399
SYPL1|protein_coding	-0.180921	5.58042	-2.77376	0.00579013	0.0576099	-2.73429
SLC26A1|protein_coding	-0.178667	0.987131	-2.77369	0.00579145	0.0576099	-2.73449
RPP40|protein_coding	-0.19675	2.33797	-2.77291	0.00580497	0.0577148	-2.73655
DXO|protein_coding	-0.20423	3.32423	-2.77272	0.00580828	0.0577165	-2.73705
PDE3B|protein_coding	0.086788	0.235998	2.77256	0.00581106	0.0577165	-2.73748
NUDC|protein_coding	-0.16234	5.40407	-2.77236	0.00581457	0.0577219	-2.73801
LRRC8D|protein_coding	-0.172736	3.46548	-2.77168	0.00582664	0.0577913	-2.73984
FBP2|protein_coding	0.0542479	0.108417	2.77146	0.00583037	0.0577913	-2.7404
CDK11A|protein_coding	-0.0495235	0.270319	-2.7712	0.00583498	0.0577913	-2.7411
HLA-DPB1|protein_coding	0.461736	4.77001	2.77117	0.00583558	0.0577913	-2.74119
STK33|protein_coding	-0.16518	0.975845	-2.77112	0.00583639	0.0577913	-2.74131
MYL5|protein_coding	-0.20024	1.50174	-2.7699	0.00585784	0.0579742	-2.74455
DAPK1|protein_coding	0.236355	2.28175	2.7694	0.00586671	0.0580067	-2.74589
SLC26A11|protein_coding	0.183671	2.42002	2.76914	0.00587134	0.0580067	-2.74658
PEAK3|protein_coding	0.0761394	0.345822	2.76911	0.00587181	0.0580067	-2.74666
ZNF487|protein_coding	-0.136733	1.14062	-2.76896	0.00587449	0.0580067	-2.74706
KRTAP5-10|protein_coding	-0.139231	0.464188	-2.76888	0.00587602	0.0580067	-2.74729
AC006254|protein_coding	-0.0309454	0.12129	-2.76843	0.00588396	0.0580557	-2.74848
RAMP2|protein_coding	0.311162	3.64553	2.76791	0.00589323	0.058098	-2.74987
COL15A1|protein_coding	0.277708	2.26634	2.76785	0.00589421	0.058098	-2.75002
NSUN3|protein_coding	-0.105597	1.61131	-2.76759	0.00589877	0.0581134	-2.7507
CYGB|protein_coding	0.223786	1.5707	2.76731	0.00590377	0.0581334	-2.75145
C7orf25|protein_coding	-0.0485888	0.287805	-2.76632	0.00592146	0.0582581	-2.75409
PTPRE|protein_coding	0.130905	1.1563	2.76626	0.00592243	0.0582581	-2.75423
PRR15|protein_coding	-0.380083	3.53119	-2.76546	0.00593673	0.058343	-2.75636
NAIP|protein_coding	0.0292077	0.128106	2.76538	0.00593829	0.058343	-2.75659
JAM3|protein_coding	0.194644	0.986378	2.76528	0.00594004	0.058343	-2.75685
GABRA3|protein_coding	0.270203	0.583475	2.76368	0.00596872	0.0585952	-2.7611
ZNF610|protein_coding	-0.174658	1.80861	-2.76288	0.00598305	0.0587063	-2.76322
PTGS1|protein_coding	-0.390231	5.52021	-2.76214	0.00599639	0.0588075	-2.76518
ITGA8|protein_coding	0.10247	0.381025	2.7617	0.00600425	0.0588549	-2.76634
ITGA1|protein_coding	0.138056	1.18334	2.75999	0.00603529	0.0591295	-2.77089
TRNAU1AP|protein_coding	-0.16699	2.3429	-2.75959	0.00604245	0.0591582	-2.77193
TRIM29|protein_coding	0.499613	2.97814	2.75949	0.0060443	0.0591582	-2.7722
GPR89A|protein_coding	-0.112725	1.03323	-2.75868	0.00605907	0.0592625	-2.77436
DOCK10|protein_coding	0.132783	0.763447	2.75857	0.00606105	0.0592625	-2.77464
SUFU|protein_coding	0.157726	2.54831	2.7576	0.00607877	0.0594061	-2.77722
MEIG1|protein_coding	-0.17936	0.757501	-2.75739	0.00608262	0.0594138	-2.77778
MICAL2|protein_coding	0.252574	1.77868	2.75702	0.00608926	0.0594226	-2.77874
WBP1L|protein_coding	0.177358	3.29436	2.757	0.00608962	0.0594226	-2.77879
CCDC192|protein_coding	-0.0795097	0.344975	-2.75567	0.00611412	0.0596135	-2.78233
DHRS7C|protein_coding	0.0133842	0.00605263	2.7556	0.00611531	0.0596135	-2.78251
[truncated: 17,479 more rows]
