# Supplementary material for: Prognostic role of long non-coding RNA USP30-AS1 in ovarian cancer: insights into immune cell infiltration in the tumor microenvironment
Source: Aging (Albany NY). 2023 Dec 4;15(23):13776–98. doi: 10.18632/aging.205262 (PMC10756134; doi:10.18632/aging.205262)
Supplement: Supplementary Table 4 [file aging-15-205262-s005.xlsx]

## Sheet: Supplementary File 4
Supplementary Table 4. Prediction results by nomogram model.
event	time	Age	Stage	Grade	Risk	Nomogram
0	338	38	Stage III-IV	G1	-0.209808	-0.560667
1	1720	45	Stage III-IV	G2	-0.167742	11.0602
1	1380	49	Stage III-IV	G2	-0.116874	11.2578
1	2561	52	Stage III-IV	G2	-0.0319361	11.5048
1	2400	39	Stage III-IV	G2	-0.23323	10.7866
1	1032	43	Stage III-IV	G2	-0.100028	11.1581
0	1053	45	Stage III-IV	G2	0.00586682	11.4267
0	374	47	Stage III-IV	G2	-0.501021	10.4018
1	555	47	Stage III-IV	G2	0.0565508	11.5788
1	1470	51	Stage III-IV	G2	-0.207348	11.112
0	122	53	Stage III-IV	G2	0.0845847	11.7734
1	951	54	Stage III-IV	G2	-0.343283	10.8927
0	741	54	Stage III-IV	G2	-0.17862	11.2403
1	1875	54	Stage III-IV	G2	-0.102976	11.4
1	1688	55	Stage III-IV	G2	-0.013981	11.6104
1	1815	56	Stage III-IV	G2	-0.119947	11.4093
1	871	57	Stage III-IV	G2	-0.246458	11.1648
1	1161	58	Stage III-IV	G2	-0.221345	11.2403
0	1977	60	Stage III-IV	G2	-0.159502	11.416
1	2749	60	Stage III-IV	G2	-0.0950058	11.5522
1	914	61	Stage III-IV	G2	-0.135066	11.4901
0	1993	62	Stage III-IV	G2	-0.0941295	11.5991
1	1229	62	Stage III-IV	G2	0.0797147	11.9661
1	2490	65	Stage III-IV	G2	-0.310075	11.2109
1	1448	66	Stage III-IV	G2	-0.147087	11.5776
1	2553	70	Stage III-IV	G2	-0.156687	11.6475
1	1266	73	Stage III-IV	G2	-0.094109	11.8473
1	1199	74	Stage III-IV	G2	-0.0664045	11.9284
1	2621	75	Stage III-IV	G2	-0.218758	11.6293
1	2648	76	Stage III-IV	G2	-0.638071	10.7667
0	571	76	Stage III-IV	G2	-0.350835	11.373
1	61	78	Stage III-IV	G2	-0.14754	11.8473
0	932	40	Stage I-II	G2	-0.141882	10.7105
0	783	43	Stage I-II	G2	-0.134059	10.7947
0	2032	43	Stage I-II	G2	-0.0704223	10.9291
0	2338	53	Stage I-II	G2	-0.495055	10.2582
1	1329	53	Stage I-II	G2	-0.20044	10.8802
0	1882	61	Stage I-II	G2	-0.53907	10.3458
0	1844	71	Stage I-II	G2	-0.0743692	11.5524
0	932	81	Stage I-II	G2	-0.525879	10.8248
1	629	48	Stage III-IV	G2	-0.242889	10.9693
0	67	49	Stage III-IV	G2	-0.208498	11.0644
1	1662	49	Stage III-IV	G2	-0.0368154	11.4268
1	1069	50	Stage III-IV	G2	-0.212465	11.0786
1	1877	52	Stage III-IV	G2	-0.423679	10.6779
1	2634	59	Stage III-IV	G2	-0.276345	11.1468
1	1114	61	Stage III-IV	G2	-0.145121	11.4689
1	186	65	Stage III-IV	G2	-0.31035	11.2104
0	165	40	Stage III-IV	G3	0.00658589	11.3929
1	1947	50	Stage III-IV	G3	-0.322651	10.9234
0	928	54	Stage III-IV	G3	-0.559202	10.5143
1	1364	54	Stage III-IV	G3	-0.0657126	11.5561
0	547	57	Stage III-IV	G3	0.0654224	11.9006
1	1483	44	Stage III-IV	G3	-0.62918	10.141
0	1207	48	Stage III-IV	G3	-0.113265	11.3203
0	176	51	Stage III-IV	G3	-0.232064	11.1372
1	1767	53	Stage III-IV	G3	-0.264739	11.1134
1	2742	53	Stage III-IV	G3	-0.180585	11.291
1	695	53	Stage III-IV	G3	-0.0868503	11.4889
0	105	54	Stage III-IV	G3	-0.530313	10.5753
1	524	54	Stage III-IV	G3	-0.0418777	11.6064
0	989	57	Stage III-IV	G3	-0.465349	10.7801
1	1721	58	Stage III-IV	G3	-0.563965	10.5945
0	1342	60	Stage III-IV	G3	-1.05466	9.60376
1	1024	76	Stage III-IV	G3	-0.183845	11.803
0	260	83	Stage III-IV	G3	-0.358281	11.5927
0	2329	87	Stage III-IV	G3	-0.304309	11.7968
0	918	30	Stage III-IV	G3	-0.0828214	10.9785
1	1442	36	Stage III-IV	G3	-0.218934	10.8266
1	2009	38	Stage III-IV	G3	-0.0103349	11.312
1	883	38	Stage III-IV	G3	0.0217355	11.3797
1	3260	39	Stage III-IV	G3	-0.313652	10.6943
0	699	40	Stage III-IV	G3	-0.363822	10.6109
0	956	40	Stage III-IV	G3	-0.0751967	11.2202
1	629	40	Stage III-IV	G3	0.0950749	11.5797
0	589	41	Stage III-IV	G3	-0.136034	11.1144
0	1919	42	Stage III-IV	G3	-0.424873	10.5272
0	116	42	Stage III-IV	G3	-0.25569	10.8843
1	1725	42	Stage III-IV	G3	-0.0787769	11.2578
1	2028	42	Stage III-IV	G3	-0.0755771	11.2645
0	1658	42	Stage III-IV	G3	-0.0563468	11.3051
0	1503	43	Stage III-IV	G3	-0.297322	10.819
0	61	43	Stage III-IV	G3	-0.121135	11.1909
0	163	43	Stage III-IV	G3	0.00561583	11.4585
0	2535	44	Stage III-IV	G3	-1.08048	9.18831
1	377	44	Stage III-IV	G3	-0.296039	10.8443
1	608	44	Stage III-IV	G3	-0.2401	10.9623
1	1000	44	Stage III-IV	G3	-0.205866	11.0346
1	1579	44	Stage III-IV	G3	-0.050096	11.3634
0	181	45	Stage III-IV	G3	-0.402777	10.6415
1	1039	45	Stage III-IV	G3	-0.372374	10.7057
0	816	45	Stage III-IV	G3	-0.333429	10.7879
0	2616	45	Stage III-IV	G3	-0.290026	10.8795
0	133	45	Stage III-IV	G3	-0.213663	11.0407
1	1484	45	Stage III-IV	G3	0.0139755	11.5213
0	3525	45	Stage III-IV	G3	0.173029	11.857
0	508	45	Stage III-IV	G3	0.17784	11.8672
0	268	46	Stage III-IV	G3	-0.364809	10.7442
0	148	46	Stage III-IV	G3	-0.220269	11.0493
0	547	46	Stage III-IV	G3	-0.198814	11.0946
1	1399	46	Stage III-IV	G3	-0.102082	11.2988
1	1946	46	Stage III-IV	G3	-0.0986587	11.306
1	1955	46	Stage III-IV	G3	-0.0154469	11.4817
0	643	47	Stage III-IV	G3	-0.70184	10.0553
0	3871	47	Stage III-IV	G3	-0.47154	10.5415
1	637	47	Stage III-IV	G3	-0.157663	11.204
0	1386	47	Stage III-IV	G3	-0.089628	11.3477
1	1355	48	Stage III-IV	G3	-0.322031	10.8796
1	2345	48	Stage III-IV	G3	-0.296281	10.934
0	2469	48	Stage III-IV	G3	-0.288772	10.9498
1	1319	48	Stage III-IV	G3	-0.217164	11.101
0	686	48	Stage III-IV	G3	-0.141948	11.2598
1	976	48	Stage III-IV	G3	-0.132395	11.2799
0	24	48	Stage III-IV	G3	-0.0829915	11.3842
0	168	48	Stage III-IV	G3	0.0275426	11.6176
0	1785	49	Stage III-IV	G3	-0.486538	10.5549
0	655	49	Stage III-IV	G3	-0.268851	11.0144
0	2121	49	Stage III-IV	G3	-0.17377	11.2152
0	442	49	Stage III-IV	G3	-0.141164	11.284
0	253	49	Stage III-IV	G3	-0.106568	11.357
1	1213	49	Stage III-IV	G3	-0.0868579	11.3986
1	1249	49	Stage III-IV	G3	-0.0449471	11.4871
1	1646	50	Stage III-IV	G3	-0.227562	11.1242
0	529	50	Stage III-IV	G3	-0.191065	11.2012
1	1389	50	Stage III-IV	G3	-0.170279	11.2451
0	3619	50	Stage III-IV	G3	-0.16699	11.252
1	204	50	Stage III-IV	G3	-0.161487	11.2636
1	2692	50	Stage III-IV	G3	-0.129172	11.3319
1	1583	50	Stage III-IV	G3	-0.100888	11.3916
1	731	50	Stage III-IV	G3	-0.00196985	11.6004
0	3746	51	Stage III-IV	G3	-0.71576	10.1161
0	3532	51	Stage III-IV	G3	-0.603797	10.3525
0	145	51	Stage III-IV	G3	-0.309854	10.973
0	2534	51	Stage III-IV	G3	-0.186272	11.2339
0	192	51	Stage III-IV	G3	-0.185321	11.2359
1	3224	51	Stage III-IV	G3	-0.151648	11.307
1	36	51	Stage III-IV	G3	-0.151135	11.3081
1	304	51	Stage III-IV	G3	-0.146431	11.318
1	690	51	Stage III-IV	G3	-0.117449	11.3792
0	581	51	Stage III-IV	G3	-0.0290563	11.5658
0	204	52	Stage III-IV	G3	-0.256431	11.1083
0	875	52	Stage III-IV	G3	-0.200738	11.2259
0	2661	52	Stage III-IV	G3	-0.119491	11.3974
0	885	52	Stage III-IV	G3	-0.0781398	11.4847
0	2571	52	Stage III-IV	G3	-0.0539776	11.5357
1	1484	52	Stage III-IV	G3	0.0376121	11.7291
1	1102	53	Stage III-IV	G3	-0.569912	10.4691
1	1579	53	Stage III-IV	G3	-0.320524	10.9956
1	2467	53	Stage III-IV	G3	-0.237541	11.1708
0	2078	53	Stage III-IV	G3	-0.182131	11.2877
0	3325	53	Stage III-IV	G3	-0.142797	11.3708
1	1189	53	Stage III-IV	G3	-0.038969	11.59
1	2182	54	Stage III-IV	G3	-0.372016	10.9095
1	1064	54	Stage III-IV	G3	-0.0101044	11.6735
0	163	55	Stage III-IV	G3	-0.360489	10.9564
1	962	55	Stage III-IV	G3	-0.243027	11.2043
1	1104	55	Stage III-IV	G3	-0.13385	11.4348
1	2089	55	Stage III-IV	G3	-0.122339	11.4591
1	1620	55	Stage III-IV	G3	-0.0112716	11.6935
1	1279	55	Stage III-IV	G3	0.125949	11.9832
1	1757	55	Stage III-IV	G3	0.394474	12.5501
0	3500	56	Stage III-IV	G3	-0.847124	9.95163
0	4424	56	Stage III-IV	G3	-0.179908	11.3601
1	1699	56	Stage III-IV	G3	-0.16446	11.3927
0	763	56	Stage III-IV	G3	-0.134068	11.4569
1	1163	56	Stage III-IV	G3	-0.0972551	11.5346
1	1102	56	Stage III-IV	G3	-0.057588	11.6183
1	1082	56	Stage III-IV	G3	-0.0393465	11.6568
1	515	56	Stage III-IV	G3	0.063873	11.8747
1	11	57	Stage III-IV	G3	-0.473558	10.7628
0	1684	57	Stage III-IV	G3	-0.446252	10.8204
1	1106	57	Stage III-IV	G3	-0.235928	11.2644
1	1324	57	Stage III-IV	G3	-0.183086	11.376
0	1752	57	Stage III-IV	G3	-0.137843	11.4715
1	53	57	Stage III-IV	G3	-0.12534	11.4979
1	1492	57	Stage III-IV	G3	-0.117131	11.5152
1	346	57	Stage III-IV	G3	-0.10627	11.5381
1	493	57	Stage III-IV	G3	-0.0753826	11.6033
1	260	57	Stage III-IV	G3	-0.0438137	11.67
1	676	57	Stage III-IV	G3	0.0232622	11.8116
0	1573	57	Stage III-IV	G3	0.0642506	11.8981
0	1372	58	Stage III-IV	G3	-0.567529	10.587
1	1366	58	Stage III-IV	G3	-0.482233	10.767
1	663	58	Stage III-IV	G3	-0.159364	11.4486
0	684	58	Stage III-IV	G3	-0.156727	11.4542
0	147	58	Stage III-IV	G3	-0.108682	11.5556
1	637	58	Stage III-IV	G3	-0.0452258	11.6895
0	220	58	Stage III-IV	G3	-0.042224	11.6959
1	1103	58	Stage III-IV	G3	0.0614414	11.9147
1	1680	59	Stage III-IV	G3	-0.243206	11.2942
0	4077	59	Stage III-IV	G3	-0.169302	11.4502
0	5481	59	Stage III-IV	G3	-0.135391	11.5218
1	568	59	Stage III-IV	G3	0.326626	12.4971
1	455	59	Stage III-IV	G3	0.447881	12.753
1	1018	59	Stage III-IV	G3	0.476097	12.8126
0	130	60	Stage III-IV	G3	-0.414943	10.9542
0	1900	60	Stage III-IV	G3	-0.270837	11.2584
1	2012	60	Stage III-IV	G3	-0.0740467	11.6738
1	396	60	Stage III-IV	G3	-0.0392509	11.7473
0	36	60	Stage III-IV	G3	0.0537046	11.9435
1	1089	60	Stage III-IV	G3	0.460204	12.8016
0	190	61	Stage III-IV	G3	-0.351012	11.1117
1	701	61	Stage III-IV	G3	-0.191195	11.4491
1	75	61	Stage III-IV	G3	-0.172347	11.4889
1	2097	61	Stage III-IV	G3	-0.140105	11.5569
1	1024	61	Stage III-IV	G3	-0.0150349	11.821
1	895	61	Stage III-IV	G3	0.0464697	11.9508
1	1249	61	Stage III-IV	G3	0.0682856	11.9968
1	1359	62	Stage III-IV	G3	-0.284108	11.2755
1	949	62	Stage III-IV	G3	-0.279758	11.2847
1	1562	62	Stage III-IV	G3	-0.18028	11.4947
0	379	62	Stage III-IV	G3	-0.108562	11.6461
0	239	62	Stage III-IV	G3	-0.0660157	11.7359
0	2182	63	Stage III-IV	G3	-1.29251	9.16935
0	952	63	Stage III-IV	G3	-0.281369	11.3038
0	1998	63	Stage III-IV	G3	-0.213554	11.447
1	1046	63	Stage III-IV	G3	-0.209532	11.4555
0	98	63	Stage III-IV	G3	-0.191802	11.4929
1	354	63	Stage III-IV	G3	-0.107895	11.67
1	138	63	Stage III-IV	G3	-0.085978	11.7163
0	360	63	Stage III-IV	G3	-0.0572697	11.7769
1	788	63	Stage III-IV	G3	-0.0524949	11.787
0	3953	64	Stage III-IV	G3	-0.34049	11.2016
0	886	64	Stage III-IV	G3	-0.186663	11.5263
0	113	64	Stage III-IV	G3	-0.0400461	11.8358
1	1891	64	Stage III-IV	G3	0.00728347	11.9357
1	90	64	Stage III-IV	G3	0.205145	12.3534
0	772	65	Stage III-IV	G3	-0.702805	10.4593
0	3400	65	Stage III-IV	G3	-0.574602	10.73
1	919	65	Stage III-IV	G3	-0.531729	10.8205
1	1484	65	Stage III-IV	G3	-0.352633	11.1985
0	1233	65	Stage III-IV	G3	-0.29871	11.3124
1	857	65	Stage III-IV	G3	-0.0913575	11.7501
1	1155	65	Stage III-IV	G3	-0.0667085	11.8021
0	1212	65	Stage III-IV	G3	-0.0567341	11.8232
1	518	65	Stage III-IV	G3	-0.00183606	11.9391
1	1033	65	Stage III-IV	G3	0.00904678	11.962
0	1722	65	Stage III-IV	G3	0.0267724	11.9994
1	129	65	Stage III-IV	G3	1.32309	14.736
1	3819	66	Stage III-IV	G3	-0.424364	11.0697
1	61	66	Stage III-IV	G3	-0.307808	11.3157
1	2688	66	Stage III-IV	G3	-0.305966	11.3196
0	2661	66	Stage III-IV	G3	-0.305264	11.3211
1	1088	66	Stage III-IV	G3	-0.171931	11.6025
0	106	66	Stage III-IV	G3	-0.170058	11.6065
1	840	66	Stage III-IV	G3	-0.15538	11.6375
0	679	66	Stage III-IV	G3	-0.144367	11.6607
1	1451	66	Stage III-IV	G3	-0.138193	11.6738
1	1736	66	Stage III-IV	G3	-0.101343	11.7516
1	619	66	Stage III-IV	G3	0.0895561	12.1545
0	2143	67	Stage III-IV	G3	-0.405885	11.1312
0	4665	67	Stage III-IV	G3	-0.342218	11.2656
1	1384	67	Stage III-IV	G3	-0.315901	11.3212
0	441	67	Stage III-IV	G3	-0.211353	11.5419
1	547	67	Stage III-IV	G3	-0.114638	11.746
1	627	67	Stage III-IV	G3	-0.0995529	11.7779
1	4624	67	Stage III-IV	G3	-0.0868507	11.8047
0	183	67	Stage III-IV	G3	-0.0819523	11.815
1	1511	67	Stage III-IV	G3	-0.0244597	11.9364
1	567	67	Stage III-IV	G3	0.148105	12.3007
1	787	67	Stage III-IV	G3	0.44652	12.9306
1	3622	68	Stage III-IV	G3	-0.455798	11.0484
0	243	68	Stage III-IV	G3	-0.0471335	11.9111
1	863	68	Stage III-IV	G3	-0.044885	11.9159
0	255	69	Stage III-IV	G3	-1.16507	9.57373
1	1746	69	Stage III-IV	G3	-0.618984	10.7265
1	1123	69	Stage III-IV	G3	-0.405102	11.178
1	25	70	Stage III-IV	G3	-0.511151	10.9767
0	3388	70	Stage III-IV	G3	-0.452321	11.1009
1	2218	70	Stage III-IV	G3	-0.329154	11.3609
1	760	70	Stage III-IV	G3	-0.303998	11.414
1	1247	70	Stage III-IV	G3	-0.134921	11.7709
1	379	70	Stage III-IV	G3	-0.0203068	12.0129
1	74	71	Stage III-IV	G3	-0.536211	10.9463
0	277	71	Stage III-IV	G3	-0.243808	11.5636
1	563	71	Stage III-IV	G3	-0.208134	11.6389
1	92	71	Stage III-IV	G3	-0.208101	11.639
1	542	71	Stage III-IV	G3	-0.1501	11.7614
1	1369	71	Stage III-IV	G3	-0.0501264	11.9725
1	462	71	Stage III-IV	G3	-0.0276958	12.0198
1	820	71	Stage III-IV	G3	0.0148022	12.1095
0	967	71	Stage III-IV	G3	0.0645002	12.2144
1	1583	71	Stage III-IV	G3	0.085066	12.2579
0	1209	72	Stage III-IV	G3	-0.415051	11.2247
1	304	72	Stage III-IV	G3	-0.1601	11.7629
1	1769	72	Stage III-IV	G3	-0.146214	11.7922
1	395	72	Stage III-IV	G3	-0.143819	11.7972
0	168	72	Stage III-IV	G3	-0.0957849	11.8986
0	3096	72	Stage III-IV	G3	-0.000682273	12.0994
1	2012	73	Stage III-IV	G3	-0.507229	11.0526
1	1784	73	Stage III-IV	G3	-0.366595	11.3495
1	1162	73	Stage III-IV	G3	-0.131362	11.8461
1	1977	73	Stage III-IV	G3	-0.126982	11.8553
1	9	73	Stage III-IV	G3	-0.109396	11.8925
1	1742	73	Stage III-IV	G3	-0.0770251	11.9608
1	394	73	Stage III-IV	G3	-0.0619054	11.9927
1	594	73	Stage III-IV	G3	-0.0155649	12.0905
1	1073	73	Stage III-IV	G3	0.0296037	12.1859
1	1035	74	Stage III-IV	G3	-0.409515	11.2815
0	2143	74	Stage III-IV	G3	-0.321768	11.4667
1	197	74	Stage III-IV	G3	-0.00558568	12.1342
0	2547	74	Stage III-IV	G3	-0.00335662	12.1389
1	1058	74	Stage III-IV	G3	0.0405923	12.2316
1	312	74	Stage III-IV	G3	0.190606	12.5483
0	89	75	Stage III-IV	G3	-0.229346	11.6844
1	1169	75	Stage III-IV	G3	-0.0801201	11.9994
1	1091	75	Stage III-IV	G3	-0.0318489	12.1013
0	915	76	Stage III-IV	G3	-0.179158	11.8129
1	1278	76	Stage III-IV	G3	-0.128184	11.9205
1	457	76	Stage III-IV	G3	-0.0574682	12.0698
1	24	76	Stage III-IV	G3	0.012536	12.2175
1	446	77	Stage III-IV	G3	-0.458419	11.2459
1	1993	77	Stage III-IV	G3	-0.41046	11.3472
0	454	77	Stage III-IV	G3	-0.358594	11.4566
1	679	77	Stage III-IV	G3	-0.181082	11.8314
1	336	77	Stage III-IV	G3	-0.175955	11.8422
1	1259	77	Stage III-IV	G3	-0.0640065	12.0785
1	286	78	Stage III-IV	G3	-0.287257	11.6298
1	1336	78	Stage III-IV	G3	-0.210936	11.7909
0	1418	78	Stage III-IV	G3	-0.195528	11.8234
0	232	78	Stage III-IV	G3	-0.168459	11.8806
1	2811	78	Stage III-IV	G3	-0.0568245	12.1162
0	260	79	Stage III-IV	G3	-0.0565122	12.1395
1	608	79	Stage III-IV	G3	-0.0410296	12.1721
1	1059	79	Stage III-IV	G3	0.0165444	12.2937
1	636	80	Stage III-IV	G3	-0.286573	11.6764
0	176	80	Stage III-IV	G3	-0.214401	11.8287
1	608	80	Stage III-IV	G3	-0.153287	11.9577
1	528	80	Stage III-IV	G3	0.020021	12.3236
1	730	81	Stage III-IV	G3	-0.48687	11.2761
1	1157	81	Stage III-IV	G3	-0.0304834	12.2395
1	531	81	Stage III-IV	G3	0.00365597	12.3116
1	737	82	Stage III-IV	G3	-0.0313877	12.2602
0	527	82	Stage III-IV	G3	-0.030912	12.2612
1	23	82	Stage III-IV	G3	0.339141	13.0424
1	592	83	Stage III-IV	G3	-0.034907	12.2753
1	728	84	Stage III-IV	G3	0.0428084	12.4619
1	562	87	Stage III-IV	G3	0.0659981	12.5785
1	624	55	Stage I-II	G3	-0.199154	11.0054
0	1293	55	Stage I-II	G3	-0.395801	10.5903
0	1357	68	Stage I-II	G3	-0.682771	10.2778
0	576	78	Stage I-II	G3	-0.00657725	11.9308
1	2148	50	Stage I-II	G3	-0.603651	10.0388
0	420	55	Stage I-II	G3	-0.320217	10.7499
1	1446	58	Stage I-II	G3	-0.46435	10.5133
0	186	77	Stage I-II	G3	-0.135482	11.6361
0	797	78	Stage I-II	G3	-1.35221	9.09021
1	676	53	Stage I-II	G3	-0.321042	10.703
0	1127	56	Stage I-II	G3	-0.0297413	11.3856
1	1348	59	Stage I-II	G3	0.0318486	11.5833
1	1499	62	Stage I-II	G3	-0.0225172	11.5362
0	751	63	Stage I-II	G3	-1.2797	8.90488
0	16	63	Stage I-II	G3	-0.0628504	11.4736
1	887	80	Stage I-II	G3	-0.0906953	11.7984
0	194	34	Stage III-IV	G3	0.0739538	11.3997
1	1004	42	Stage III-IV	G3	-0.164256	11.0773
0	1364	42	Stage III-IV	G3	-0.0428908	11.3335
1	679	44	Stage III-IV	G3	-0.0864527	11.2867
0	343	45	Stage III-IV	G3	-0.333746	10.7872
0	2614	45	Stage III-IV	G3	-0.303136	10.8518
1	1516	45	Stage III-IV	G3	-0.105124	11.2698
1	1446	45	Stage III-IV	G3	-0.0687803	11.3466
1	479	45	Stage III-IV	G3	-0.0408577	11.4055
0	81	46	Stage III-IV	G3	-0.0609799	11.3856
1	949	48	Stage III-IV	G3	-0.0405202	11.4739
1	868	49	Stage III-IV	G3	-0.173386	11.216
1	2342	49	Stage III-IV	G3	-0.124476	11.3192
1	1314	50	Stage III-IV	G3	-0.136613	11.3162
1	952	50	Stage III-IV	G3	-0.0981184	11.3974
0	92	50	Stage III-IV	G3	0.133084	11.8855
0	2369	51	Stage III-IV	G3	-0.330076	10.9303
1	3337	51	Stage III-IV	G3	-0.204876	11.1946
1	1650	52	Stage III-IV	G3	-0.221943	11.1811
0	468	52	Stage III-IV	G3	-0.0248932	11.5971
1	1264	53	Stage III-IV	G3	-0.134949	11.3873
0	238	54	Stage III-IV	G3	-0.433347	10.78
1	1355	55	Stage III-IV	G3	-0.152932	11.3945
1	189	55	Stage III-IV	G3	-0.118675	11.4668
1	1933	56	Stage III-IV	G3	-0.142796	11.4385
1	65	58	Stage III-IV	G3	-0.222907	11.3145
1	2717	58	Stage III-IV	G3	-0.204569	11.3532
1	1843	58	Stage III-IV	G3	-0.170703	11.4247
1	2154	59	Stage III-IV	G3	-0.452879	10.8516
1	365	59	Stage III-IV	G3	-0.105724	11.5844
1	9	59	Stage III-IV	G3	-0.0704105	11.6589
0	848	59	Stage III-IV	G3	-0.0444925	11.7137
1	885	60	Stage III-IV	G3	-0.177185	11.4561
0	3825	61	Stage III-IV	G3	-0.21862	11.3912
1	91	62	Stage III-IV	G3	-0.144052	11.5712
1	820	62	Stage III-IV	G3	0.00343474	11.8825
1	351	63	Stage III-IV	G3	-0.275723	11.3158
0	847	63	Stage III-IV	G3	-0.151005	11.579
0	2438	64	Stage III-IV	G3	-0.294064	11.2996
1	8	64	Stage III-IV	G3	-0.0407318	11.8344
1	1158	68	Stage III-IV	G3	0.0170113	12.0465
1	1799	68	Stage III-IV	G3	0.0279238	12.0696
1	2049	68	Stage III-IV	G3	0.113806	12.2508
1	31	69	Stage III-IV	G3	-0.0825395	11.8589
1	565	71	Stage III-IV	G3	-0.440565	11.1483
1	821	71	Stage III-IV	G3	-0.191958	11.6731
1	361	72	Stage III-IV	G3	-0.187488	11.7051
1	83	72	Stage III-IV	G3	0.171934	12.4638
1	3128	73	Stage III-IV	G3	-0.322329	11.443
1	84	73	Stage III-IV	G3	-0.133653	11.8413
1	31	75	Stage III-IV	G3	0.29968	12.8011
0	1919	81	Stage III-IV	G3	-0.158534	11.9692
