# Supplementary material for: Prognostic role of long non-coding RNA USP30-AS1 in ovarian cancer: insights into immune cell infiltration in the tumor microenvironment
Source: Aging (Albany NY). 2023 Dec 4;15(23):13776–98. doi: 10.18632/aging.205262 (PMC10756134; doi:10.18632/aging.205262)
Supplement: Supplementary Table 5 [file aging-15-205262-s006.xlsx]

## Sheet: Supplementary File 5
Supplementary Table 5. Drug sensitivity analysis results.
	Camptothecin_1003	Vinblastine_1004	Cisplatin_1005	Cytarabine_1006	Docetaxel_1007	Gefitinib_1010	Navitoclax_1011	Vorinostat_1012	Nilotinib_1013	Olaparib_1017	Axitinib_1021	AZD7762_1022	SB216763_1025	KU-55933_1030	Afatinib_1032	Staurosporine_1034	PLX-4720_1036	NU7441_1038	Doramapimod_1042	Wee1 Inhibitor_1046	Nutlin-3a (-)_1047	Mirin_1048	PD173074_1049	ZM447439_1050	Alisertib_1051	RO-3306_1052	MK-2206_1053	Palbociclib_1054	Dactolisib_1057	Pictilisib_1058	AZD8055_1059	PD0325901_1060	Obatoclax Mesylate_1068	5-Fluorouracil_1073	Dasatinib_1079	Paclitaxel_1080	Crizotinib_1083	Rapamycin_1084	Sorafenib_1085	BI-2536_1086	Irinotecan_1088	Oxaliplatin_1089	BMS-536924_1091	GSK1904529A_1093	Tozasertib_1096	PF-4708671_1129	PRIMA-1MET_1131	Erlotinib_1168	Niraparib_1177
TCGA-29-1766	0.125323	0.00910798	12.2861	6.12422	0.00749786	40.501	35.5764	5.43228	36.1666	72.9406	27.5362	1.37381	163.337	61.6948	8.38592	0.0182912	89.4771	11.4114	99.1461	9.81844	144.139	104.245	52.8355	25.5707	5.64023	17.4924	23.2221	24.6042	0.144925	4.32739	0.675893	1.85106	2.11516	38.3001	1.13397	0.0324484	33.6259	0.0936852	27.1284	0.877805	13.2187	39.5118	7.31304	89.8728	17.0474	72.4295	71.5933	17.6061	55.6781
TCGA-09-2051	0.0511725	0.0173466	15.3154	12.6981	0.0123994	23.9	23.9762	7.39151	60.1731	54.0409	22.8929	1.36681	207.752	61.1607	6.80534	0.0506665	74.6551	14.692	102.123	7.48881	441.551	208.735	89.4811	11.3458	9.84627	16.265	34.8515	69.1884	0.313108	7.44684	0.92225	2.65913	3.61775	45.2971	14.7105	0.0472537	17.1211	0.0949037	21.994	1.84636	7.57931	36.4907	15.2445	52.812	20.665	41.9202	236.55	12.0303	66.6631
TCGA-24-1427	0.117509	0.0363495	50.9965	12.7137	0.0150943	42.8839	6.47258	3.33286	41.8557	91.37	40.4375	1.09664	225.562	113.916	9.27279	0.0281838	110.215	17.1664	82.6835	8.47246	62.658	149.519	56.5216	28.328	8.03045	25.2899	22.9592	48.6401	0.353853	4.69034	0.960003	2.21369	3.77634	259.443	3.26091	0.132952	34.3077	0.347867	14.246	2.39152	21.2593	66.3402	4.42728	123.122	42.9337	66.7209	97.487	17.8301	116.336
TCGA-04-1365	0.0346396	0.0113376	10.797	1.2075	0.00603097	27.9322	2.83768	2.8359	35.319	51.1381	24.7358	0.307671	266.073	72.5637	3.68074	0.0423393	85.2135	15.3854	117.184	3.55218	183.455	81.4385	77.5742	16.4936	3.89604	19.357	19.1404	24.0587	0.304481	4.1734	0.91741	1.50386	3.64997	46.552	4.93332	0.0382368	14.1874	0.160562	12.7714	1.67521	5.14056	29.6984	10.2407	49.4521	15.1463	41.9334	113.996	10.4456	41.2414
TCGA-13-0923	0.0543137	0.0262198	7.08878	14.3438	0.00950658	32.0103	12.0418	6.99107	56.7094	135.911	28.6777	1.49648	348.693	89.8721	10.457	0.137598	141.259	18.8542	171.03	12.1544	292.541	97.9375	92.09	31.1597	9.19478	23.2585	19.5974	48.0643	0.108127	1.52707	0.715465	3.10759	3.3682	37.859	3.54323	0.0710167	26.9838	0.0935499	24.8648	3.98913	6.04617	45.7747	8.26398	153.374	19.1651	36.8872	113.733	27.5001	106.125
TCGA-61-1733	0.189421	0.0699295	74.6133	19.9773	0.0348652	45.5347	14.0411	6.03828	147.466	152.129	36.5287	1.76087	298.349	111.776	16.6673	0.0606777	117.928	16.9082	121.807	11.5066	360.058	346.172	90.7337	20.7431	37.0928	15.4038	22.8675	80.5883	0.293571	5.56132	0.850086	2.25658	4.13491	163.252	4.10168	0.399029	81.3775	0.138534	42.1515	1.01627	27.6229	235.208	7.00002	157.325	17.2229	81.9668	203.096	17.698	185.733
TCGA-29-1688	0.0603243	0.0474413	19.3292	5.08058	0.0100939	25.2318	0.337279	2.09396	7.07832	63.6827	20.8561	0.232384	105.544	60.4355	5.38589	0.0543565	79.6383	12.6267	93.4694	3.02277	84.3828	92.0605	26.8157	19.1576	7.06286	17.1985	11.8157	47.8838	0.214652	3.2367	0.783495	1.59131	6.81183	68.7176	6.15648	0.0751736	11.0286	0.0730623	6.0325	1.47943	7.99931	30.5543	9.30124	57.2177	24.6269	41.1739	33.4132	15.1398	53.2678
TCGA-61-2104	0.126317	0.0667186	58.8871	8.33912	0.011754	6.90898	3.51893	5.9084	40.1153	79.5251	21.5121	0.948258	120.932	54.2731	2.10732	0.0456766	81.0061	12.5672	78.7534	10.1397	251.353	121.098	46.6423	9.16524	4.4322	15.478	26.8851	95.7485	0.44783	4.61731	0.989725	0.844084	3.32599	163.139	5.14014	0.0793217	14.7322	0.0854605	13.0022	2.92478	27.6699	82.4962	8.48043	40.8058	21.1329	33.9182	66.9963	5.27696	94.682
TCGA-25-1320	0.0513568	0.0202864	10.4506	2.64557	0.0117987	20.3816	5.8162	4.30182	32.7191	45.8371	28.7166	0.893823	185.538	82.5298	4.80063	0.0211926	65.2614	14.0255	82.1988	7.44273	43.929	152.011	25.231	17.0584	2.81712	24.2113	16.2096	28.7991	0.128113	3.18921	0.915776	0.929688	3.71868	63.3737	3.96185	0.0366366	14.4085	0.0804142	15.9261	1.56065	10.7834	30.8851	6.8048	65.1763	18.9398	83.3455	54.573	13.4083	31.0896
TCGA-13-0913	0.0814636	0.0810401	50.8503	12.4896	0.0258923	37.0406	34.9366	5.02043	54.5731	152.97	23.5823	1.78428	429.779	147.964	14.9213	0.203601	129.719	20.8118	132.9	11.9247	216.968	150.963	197.073	44.4483	24.8278	19.7487	41.1046	34.9184	0.242412	5.82394	0.731485	2.21885	4.18387	180.404	15.1848	0.354226	77.952	0.0505749	16.3708	1.68079	10.8308	52.5502	6.94017	115.431	22.5608	60.7704	128.077	23.3711	115.999
TCGA-24-2023	0.0795512	0.0157359	26.3127	10.3834	0.0067682	28.967	18.8594	9.02601	34.6445	145.123	13.608	1.35248	165.951	57.6165	7.99934	0.0561738	60.9522	10.0876	104.19	6.33626	182.62	139.791	105.001	14.8617	12.6504	11.0001	22.802	28.9434	0.112658	4.7395	0.768576	0.934742	4.06666	70.1892	10.9789	0.0213222	18.7568	0.0699944	18.0304	1.194	10.6512	40.5434	10.1004	64.5119	15.7158	44.4697	134.41	16.2693	87.586
TCGA-36-1580	0.0866189	0.0158558	25.0872	5.49644	0.0125322	30.7338	30.0041	6.04574	46.5057	80.4987	24.2155	1.78147	161.738	61.8832	7.20368	0.0362857	72.5562	10.2908	90.8639	10.9666	35.702	152.757	71.0412	22.2012	10.273	13.4635	26.6431	16.2009	0.136611	5.96132	0.755358	1.27024	2.72264	63.7807	3.20965	0.0716603	38.5494	0.0686988	23.3146	1.388	15.5331	37.2611	7.59358	106.706	18.7737	53.8213	130.899	12.8327	75.4106
TCGA-23-1029	0.0651304	0.0306179	18.3524	5.43183	0.0170688	26.2267	5.50529	6.33315	49.1344	58.6573	30.2199	2.25577	226.515	107.737	5.66429	0.0567842	64.8627	16.5324	106.71	11.3157	103.019	98.4766	47.5567	19.2508	5.98561	21.0119	34.3527	65.1019	0.348642	6.74654	1.1129	3.04068	2.88202	248.884	5.48044	0.089143	32.6712	0.123535	14.6525	0.912266	11.6245	38.7534	12.5852	62.7809	23.8434	67.5412	141.649	12.5313	55.0237
TCGA-13-0725	0.136864	0.0521852	39.989	12.5309	0.0112311	34.7045	5.23999	4.81591	33.3332	122.689	23.2858	0.618123	248.022	74.3591	7.26357	0.0531822	193.98	14.1827	126.636	14.6008	300.625	96.0564	109.973	22.0189	12.492	17.7495	15.004	53.7173	0.27475	2.68919	0.689004	3.65562	6.11576	99.419	2.93941	0.138987	34.0782	0.101014	21.7225	1.69	17.0309	59.8899	9.32774	79.2229	18.5281	37.6472	129.416	16.7046	130.89
TCGA-24-1419	0.146661	0.0175038	34.3965	9.37262	0.0137613	48.6485	8.39395	5.7149	63.2814	83.9547	41.5546	4.30799	337.208	145.095	6.52724	0.0771727	135.048	16.454	93.9758	16.1904	282.89	169.924	97.2979	24.968	5.41003	20.927	48.6167	102.942	0.323939	7.3915	0.982324	2.85802	4.06265	431.446	15.665	0.101028	30.2557	0.190438	19.7203	0.933879	21.4804	74.2106	13.5321	66.543	28.0234	76.4656	382.218	14.7705	93.6479
TCGA-25-1626	0.0423264	0.0117689	15.8178	3.47796	0.00674262	24.8895	7.90501	4.1554	29.0089	35.6594	26.0607	0.892924	94.8633	35.7545	7.82291	0.00823383	41.505	6.23433	59.5459	8.52182	24.2709	115.544	16.7736	13.1839	2.70992	11.6021	18.7435	40.6622	0.125678	2.93125	0.775607	0.885772	2.81134	94.0007	0.563434	0.0403465	24.0259	0.0912193	16.9167	1.6887	8.79162	40.4924	3.99379	97.0969	20.1355	58.5588	73.8912	14.377	43.7705
TCGA-23-1123	0.0893738	0.00704321	21.6794	4.12199	0.0083785	30.1142	0.757175	3.18086	14.6195	32.855	19.5096	0.781355	207.091	88.103	8.58855	0.0955312	34.674	20.7925	90.0891	4.33876	183.259	107.498	15.1662	13.2306	9.12488	34.4776	25.5175	67.8149	0.349586	6.58375	0.979814	1.2416	4.47106	94.3268	15.5721	0.0306223	32.8489	0.0902248	8.43495	3.00158	13.5025	45.9683	7.20397	28.3115	14.8551	47.5158	41.7135	15.5074	33.8926
TCGA-13-1483	0.172949	0.0334028	37.4338	6.7345	0.0115042	28.3315	19.8582	5.14901	37.0057	80.1215	25.8194	0.802269	176.358	105.7	4.89448	0.039377	109.446	16.5219	133.179	10.0509	106.24	158.377	72.6022	27.8181	6.5774	19.5612	31.2758	28.3226	0.489762	6.12377	0.845584	1.75612	7.12342	67.9457	7.1952	0.0566102	15.4773	0.110523	11.572	1.58446	25.0248	53.7942	10.9499	59.3857	26.7394	40.6926	114.702	15.5597	82.4813
TCGA-24-0968	0.0738729	0.0264823	14.8025	4.50971	0.00872299	21.6759	2.60626	2.25761	27.1266	78.772	25.6862	0.522031	128.716	71.4246	5.52213	0.0460196	73.9786	12.8588	99.3559	4.53803	66.444	105.343	58.4728	21.9811	3.65751	16.7225	13.8491	46.0991	0.164211	3.57289	0.739166	1.17966	4.00345	105.064	5.52869	0.0468999	14.6924	0.126409	10.361	1.83352	10.4711	38.2648	9.92898	81.3338	21.914	46.339	79.4157	11.3587	58.1263
TCGA-31-1953	0.0435226	0.00886041	8.594	4.39794	0.00567295	15.01	3.23391	5.39105	16.2913	43.8368	19.2784	0.523111	89.2196	38.0636	6.0937	0.0246148	43.4327	8.60838	73.1784	4.49187	50.5734	96.5283	23.8822	10.8451	2.56306	13.5058	16.2637	34.6758	0.102361	3.62137	0.729226	0.90559	3.93293	33.2334	3.11711	0.0172458	13.0052	0.0770253	9.18326	2.59694	6.7815	27.5403	5.14359	54.9044	20.326	35.8468	50.8447	7.7018	39.6831
TCGA-13-1495	0.0716977	0.018251	21.5228	4.39815	0.0124682	30.099	22.5215	4.557	80.5844	147.039	19.1695	0.697054	189.764	112.761	4.09854	0.0483279	142.569	15.3927	133.534	6.03433	161.804	78.5604	113.473	22.1711	2.91371	12.1776	33.211	45.2705	0.316846	5.92141	0.814155	1.78357	3.72352	75.4485	7.08947	0.100683	15.7191	0.133277	19.1804	0.800482	10.2049	35.0481	12.1318	98.6836	13.5499	52.173	81.0368	16.0159	57.6556
TCGA-13-1511	0.083033	0.0309079	23.5322	12.3209	0.0171339	14.1403	9.79568	9.14534	45.3906	59.9059	16.5539	2.57523	135.883	40.8994	3.41858	0.0502612	52.653	9.03418	75.8235	18.4862	150.396	169.407	30.0962	10.9094	7.48267	11.4506	11.6274	39.21	0.140736	4.69444	0.84831	2.80636	4.86658	184.54	8.66889	0.0775198	20.9616	0.0778412	23.2931	1.60591	16.9638	47.4224	12.3763	40.2638	16.627	38.3068	115.751	11.0045	54.1466
TCGA-59-2352	0.147737	0.0274451	51.7482	10.1122	0.0257936	47.4296	14.7194	6.43156	62.1162	58.3605	31.2001	3.43139	300.743	108.105	15.5405	0.0613251	50.6995	16.7936	88.5108	10.7831	52.1352	132.143	34.2262	21.7653	8.68756	27.1029	35.1957	48.2994	0.483371	6.43619	1.00908	3.36735	3.25777	348.317	4.32977	0.231609	54.0142	0.216302	18.2519	1.7858	23.7623	56.1935	7.00303	91.7481	18.4149	62.0648	171.098	22.6934	99.351
TCGA-24-1556	0.0332743	0.0260098	10.0626	2.25465	0.00976609	13.6447	1.59856	3.21221	13.0575	32.1002	20.0113	0.730584	145.361	71.356	7.31138	0.0512309	59.6481	13.8227	115.154	3.16556	100.365	120.766	20.7524	10.8482	2.16209	12.3818	25.4754	50.7016	0.19464	6.33449	0.962469	2.21066	4.20097	53.4224	13.2776	0.0590102	10.0731	0.100763	7.59911	1.06415	5.56439	23.3878	7.62248	26.6838	13.7396	42.0755	91.6142	7.13068	35.3087
TCGA-61-1910	0.0417717	0.00831167	14.2837	1.55166	0.0053483	24.4236	4.55376	3.31572	19.2402	55.4831	17.2632	0.649673	170.165	133.286	7.30211	0.057633	62.0939	14.8193	95.9156	2.90542	23.0445	74.8946	53.0739	18.6253	1.56662	15.4112	25.3647	12.5154	0.175139	5.12949	0.94303	0.39088	4.69443	129.527	17.5325	0.0189857	11.9807	0.053642	7.46658	0.699682	5.87206	17.2728	6.60128	53.5486	15.0645	42.1985	56.228	16.7765	31.0894
TCGA-23-1116	0.0630515	0.0162207	16.0055	4.70093	0.0073395	36.7265	3.28118	3.23348	26.0424	66.945	30.8177	1.24191	130.395	57.0396	6.64743	0.0170071	93.2657	10.2445	100.091	11.8393	73.5744	78.3865	86.144	24.9579	4.75904	16.8847	27.0518	45.286	0.184759	2.60942	0.710767	0.458129	3.19747	54.7691	0.337474	0.0653744	18.1977	0.156176	15.0288	1.15169	9.14273	28.8489	7.11282	131.486	29.0538	41.2106	77.9208	18.5363	92.8982
TCGA-25-1631	0.109344	0.121796	61.5419	10.8747	0.0279886	26.5675	10.1831	7.60355	78.9418	123.085	30.4404	2.26373	191.099	104.269	6.96401	0.114194	172.223	15.1317	96.1016	14.1042	214.555	168.755	146.499	26.7983	26.7833	17.7463	27.3849	100.458	0.165691	4.54891	0.937355	3.29629	4.80248	305.934	7.81518	0.246277	47.9745	0.103128	22.3506	1.25933	22.4095	58.0251	11.8361	143.99	29.0234	73.0536	165.158	18.1236	141.98
TCGA-13-0804	0.0759074	0.0127536	14.7961	8.44188	0.00649622	38.3715	10.2557	4.59385	37.4362	108.644	17.6509	0.741519	193.892	83.8547	5.62631	0.0404931	103.603	14.858	142.553	10.8695	225.346	71.8903	118.644	23.7913	2.92263	15.8923	15.7449	17.8724	0.157844	2.86148	0.712406	1.59187	2.94935	63.5299	5.9164	0.0317711	16.0521	0.153672	18.5906	1.36772	8.00072	32.6361	8.43125	96.0653	14.2773	37.5549	143.74	19.9805	50.0389
TCGA-13-1512	0.236821	0.0840065	34.1618	10.8137	0.0169493	29.9023	11.1391	2.48755	32.5892	123.748	27.3344	1.39452	271.149	86.6317	9.51173	0.0604664	211.425	18.7255	112.703	12.737	247.028	407.25	83.0547	28.7913	30.2132	24.6334	39.3025	34.7611	0.583135	12.6815	0.924463	1.93586	5.90189	196.703	11.2151	0.244483	40.8804	0.14146	23.8663	2.05041	28.9351	65.9323	10.4936	113.205	26.4957	56.2731	217.872	12.9599	148.296
TCGA-24-1604	0.304409	0.158291	102.391	20.4176	0.0350751	32.0523	5.17194	7.0423	53.0085	106.027	28.3999	2.25313	204.354	105.2	12.1893	0.11935	102.797	15.9969	92.4785	11.1802	258.521	222.074	75.7052	22.4999	19.1382	19.3011	29.6223	87.2462	0.499142	8.77952	1.05698	1.74339	4.07243	540.158	13.1879	0.145292	41.3018	0.202252	23.7742	1.61002	44.7242	117.515	9.29786	58.4341	26.9792	65.8134	112.866	17.5376	110.373
TCGA-04-1331	0.049501	0.0378078	19.5691	3.34455	0.0191278	21.7707	0.988485	3.31272	44.1555	49.0137	26.0585	0.540227	255.901	185.612	4.28082	0.0720288	131.184	19.7694	85.6007	6.51425	97.5407	115.711	50.2662	15.6716	5.33955	22.0406	22.5438	71.9497	0.215006	3.77057	0.931853	2.53711	8.38271	104.024	11.1522	0.0961765	20.8227	0.0962963	13.6673	0.888599	5.98575	47.4137	15.6911	86.0431	18.57	55.924	34.959	12.1957	38.4127
TCGA-24-1923	0.0784513	0.0379739	31.8797	5.31042	0.0133142	35.1301	3.66967	2.43674	22.9929	71.6571	29.1507	0.907219	151.036	136.039	8.24062	0.0397849	103.643	16.3188	99.8521	9.35363	63.9032	113.643	49.8855	31.8334	4.43849	22.9694	19.3832	53.8098	0.14794	2.80188	0.927083	1.60019	4.93079	265.621	4.82764	0.102124	18.445	0.149829	10.1875	1.07662	10.9759	33.0767	7.18684	76.8384	31.4734	80.2564	50.5623	20.4543	79.4199
TCGA-13-0911	0.0601203	0.0162232	6.94845	12.7083	0.00748623	51.989	16.4574	5.64566	52.3451	111.248	30.1472	0.749308	276.677	55.6618	9.69449	0.0215373	79.8591	12.0798	122.936	20.6056	298.599	94.5274	96.3365	24.2453	11.0976	27.4806	21.7775	22.4213	0.179219	2.5526	0.616389	1.14422	2.60719	18.9143	0.777527	0.0481408	28.2554	0.199197	35.0901	3.83058	7.68708	42.0552	7.53491	130.137	30.5243	43.3575	98.0796	25.24	74.535
TCGA-30-1855	0.117364	0.0257524	34.9005	5.22548	0.0143014	21.5707	12.7188	4.11413	75.2814	55.9744	26.4669	0.980877	188.887	73.4291	4.90839	0.0331694	94.293	13.9096	106.669	8.83863	101.967	153.635	66.0538	20.4617	9.15086	19.9504	41.6576	25.2937	0.200387	6.17086	0.865292	1.61644	5.25105	100.897	2.98263	0.0878512	31.8146	0.163047	17.4115	1.96737	13.5953	37.0047	7.92337	63.4029	21.0622	40.9511	122.669	10.9215	68.7657
TCGA-25-1319	0.215575	0.0257558	53.18	6.5637	0.0177322	28.6265	8.3006	4.76676	33.0371	53.8393	13.5239	1.70324	152.744	64.5893	3.83293	0.0715413	61.7737	13.8544	89.2089	6.95571	160.147	168.416	41.9572	13.9219	4.06847	15.3578	19.8486	28.2051	0.312414	7.49602	0.891385	3.84466	4.72328	88.0995	3.83229	0.0955678	27.7673	0.190865	13.272	1.17476	20.7662	56.743	14.3521	74.7339	7.69524	49.3663	72.8676	15.2036	76.7003
TCGA-29-1696	0.0756302	0.0440388	23.1489	5.29647	0.0130573	35.3528	18.5043	6.90276	47.0196	88.7421	36.3132	1.78322	135.901	114.933	4.85648	0.0786368	180.303	18.4879	102.165	13.7827	191.419	146.569	194.671	46.4179	17.3643	20.1567	41.8568	30.9564	0.186002	6.6858	0.712628	2.12018	3.27617	92.1478	8.29584	0.108604	32.5207	0.097868	26.0911	1.40573	8.92387	57.3842	15.7342	86.8782	46.8239	73.0683	116.051	13.4387	59.0723
TCGA-23-1024	0.0301122	0.0082686	15.8496	1.76316	0.00393217	22.7849	12.192	1.63178	23.7205	35.8867	19.0045	0.935792	306.234	156.355	5.68754	0.0317255	20.9833	22.237	140.011	3.32566	83.4986	71.8416	54.2684	25.5368	2.43448	24.7681	10.9952	18.2811	0.0816285	2.62704	0.875806	0.981886	2.7002	182.851	9.43306	0.0152464	20.7503	0.0356925	4.78715	1.11767	3.93014	13.8961	5.22585	28.6812	20.204	57.5405	59.6336	20.9253	75.4353
TCGA-61-2111	0.141026	0.0179904	25.466	4.84741	0.0128754	10.6308	3.14122	3.00119	63.4453	58.1688	24.861	1.89241	183.985	113.624	5.12396	0.0977036	97.7015	16.8203	81.6543	5.43019	68.0707	292.102	37.9718	21.6087	27.5304	19.4053	14.4276	105.315	0.214069	3.97724	1.09274	4.91478	8.03121	220.047	5.89617	0.117662	43.3894	0.210704	11.1805	1.80922	21.6689	32.9064	10.4803	84.8315	20.0253	43.2872	202.647	6.14829	100.37
TCGA-13-0885	0.0667338	0.0221879	30.9247	4.56677	0.00802885	27.8819	1.42991	2.13575	18.7275	85.4584	19.4069	0.360217	130.186	91.7139	7.51113	0.0431287	114.237	13.7201	117.474	4.65502	143.863	78.3309	63.1258	20.7601	5.42226	13.2632	20.2851	69.1927	0.297746	6.10799	0.785723	1.12103	4.06354	235.924	4.11749	0.0482799	15.8874	0.175227	8.67858	1.86566	8.82081	43.1318	8.69609	99.7619	20.7481	38.7189	51.4734	16.0309	82.0208
TCGA-24-2297	0.0852354	0.0885543	40.806	5.89156	0.0359192	14.7198	2.35699	4.98678	42.3373	65.1707	26.3035	1.42477	206.078	101.676	3.63341	0.0850058	108.678	15.4068	83.8531	8.14215	157.923	179.226	75.6671	17.0154	8.97897	15.2115	32.2129	64.7183	0.373777	6.12879	0.940756	1.54408	5.42319	241.127	10.0079	0.259697	30.9591	0.0941816	16.1039	1.43734	14.3277	37.1827	12.6742	62.2965	22.9566	42.5828	90.6498	11.5854	70.2587
TCGA-23-2081	0.233197	0.0320417	124.671	25.7887	0.0178771	16.0786	21.8931	11.806	98.37	139.106	28.6283	3.14713	183.913	86.6172	4.25383	0.122438	177.012	14.0928	84.2129	21.1791	233.119	216.783	163.652	16.2101	17.2312	17.2723	62.5447	67.7626	0.605172	10.1214	0.992378	2.40307	5.70298	337.777	15.0783	0.157201	42.6825	0.331132	36.3408	1.63571	56.0824	125.9	13.6178	82.1037	25.6268	53.7177	393.079	6.64288	194.97
TCGA-24-1435	0.036203	0.0220586	19.1614	4.39712	0.0120069	32.9348	8.48171	6.52588	39.2298	52.1046	13.2253	1.36979	178.794	38.553	7.00404	0.0334106	85.0787	8.39641	71.0268	7.46518	27.1671	108.898	48.8605	12.2204	7.68327	16.467	31.6088	32.3983	0.357191	7.99656	0.810777	2.7101	4.01696	64.249	5.42816	0.101541	22.7644	0.152065	12.8251	1.30352	7.14101	42.0414	12.7001	68.9778	9.93155	52.9766	160.884	16.0367	47.7077
TCGA-57-1582	0.384999	0.0478356	67.733	10.4509	0.0272129	31.8457	8.2302	2.99907	25.7302	117.582	44.4982	1.5841	275.786	125.744	7.11435	0.102232	146.5	20.4912	94.6287	11.7034	200.479	435.709	38.569	37.7023	22.1844	28.5547	18.3991	38.8851	0.456902	7.03851	0.925963	3.58919	8.42273	206.372	11.3006	0.0911523	43.4561	0.141021	11.4129	1.19702	66.3089	83.4792	10.5714	58.2384	45.7234	75.2157	249.175	15.7422	190.899
TCGA-61-2097	0.0603651	0.0239796	22.9024	4.46911	0.0107286	26.7676	3.23415	4.94182	34.2029	68.1171	20.3032	2.52198	133.884	60.8647	7.60243	0.0453711	32.8026	9.32007	63.4459	9.2685	38.8503	98.7627	59.77	12.2447	7.71363	14.2632	23.0382	39.6972	0.212826	3.67484	0.875945	0.791577	6.28003	108.002	9.66576	0.0538481	26.1484	0.148594	12.1538	1.54563	9.38478	35.9939	10.3563	79.2357	20.8785	43.6324	116.959	15.1359	61.0476
TCGA-13-1507	0.113447	0.00750768	9.75023	8.89736	0.0048202	17.2705	13.3686	5.72554	33.9446	72.1293	23.2931	0.62123	112.346	36.8138	5.82419	0.0118798	153.676	7.67191	116.386	11.2361	224.182	88.4119	43.5307	18.3267	8.75797	14.1337	16.4904	34.7175	0.0862996	1.122	0.552361	1.6802	1.92791	14.6529	0.16745	0.0177159	17.5498	0.0719393	20.3267	1.30527	14.0556	35.1331	6.47775	100.222	18.0983	38.1545	123.595	9.8234	57.1855
TCGA-61-2016	0.0767855	0.023386	44.8642	4.79918	0.00836033	18.5993	5.91046	6.97225	67.4781	71.1891	22.0175	1.29811	141.517	70.1051	4.05728	0.062036	83.8874	12.4173	105.192	9.24886	172.761	94.3368	88.2106	16.8328	12.4949	14.2322	19.2294	72.4387	0.175978	4.69921	0.911722	1.12023	5.34847	160.672	6.96519	0.0761199	29.5288	0.14208	20.062	1.66168	15.7267	61.8865	8.48406	55.2433	23.5184	52.1406	172.76	10.3171	86.9346
TCGA-24-1563	0.0590282	0.0328966	20.8893	11.1844	0.0175228	33.1533	14.0846	7.23525	43.7634	56.0206	25.2535	2.93844	149.245	53.6571	9.92113	0.0285864	122.96	10.4183	88.7042	19.8914	156.763	147.838	63.0882	19.6878	5.3844	17.129	50.3418	49.7866	0.229335	7.91188	0.848364	1.21838	2.7122	169.591	5.38689	0.151184	23.4717	0.127212	20.9606	1.54032	12.3246	42.4506	9.09229	76.1524	25.5376	69.6957	129.504	14.5437	56.8174
TCGA-30-1862	0.116021	0.00839358	46.565	4.0759	0.00566479	14.2314	17.4895	4.08755	30.4891	75.2689	17.554	1.36871	117.394	69.2864	4.87979	0.0346932	83.0635	10.5763	82.5412	8.76827	153.574	157.039	34.2205	14.6972	3.48583	12.037	23.738	31.2824	0.167304	3.7602	0.832451	0.68481	4.22054	101.03	2.66256	0.0239177	13.2994	0.0945592	15.2162	1.25794	14.9913	46.3581	5.90241	69.6164	16.1297	46.7092	77.853	11.4554	80.4103
TCGA-10-0934	0.0353764	0.00461903	10.4534	0.0430605	0.00158513	2.81179	6.86088	1.59466	4.76539	31.5113	18.437	7.51529	139.631	46.2842	0.276018	0.0216543	13.9573	10.8907	124.243	7.75929	5.55421	23.4196	27.7365	33.524	13.4011	13.6823	0.287878	0.427099	0.0128541	0.317018	0.596992	0.0260417	6.06412	3.23331	1.27446	0.00462723	6.89362	0.0262888	4.21486	1.43006	9.2915	4.7459	13.2007	30.661	21.3988	17.7004	31.8777	2.36129	16.3905
TCGA-23-1111	0.107421	0.0253638	62.6662	15.1874	0.00969976	15.0274	6.47597	5.21492	38.8485	77.8458	23.9757	3.63236	177.154	89.4249	0.888206	0.0582637	63.4935	16.1388	113.727	19.4816	230.622	125.215	78.9138	23.8533	9.29957	18.1921	19.1102	57.8346	0.0671607	2.52332	0.786059	3.55002	6.14854	359.066	6.22133	0.0351221	45.3127	0.0579112	16.1768	1.36307	24.5505	95.6419	12.8887	68.7828	23.8044	61.686	154.289	14.8206	92.2018
TCGA-57-1585	0.0672643	0.00720807	15.193	2.45257	0.00587819	17.039	28.4687	5.17075	37.9662	32.8499	19.0488	0.641346	131.122	41.8766	3.36851	0.00988798	38.7108	7.21414	74.1092	9.62218	72.1787	108.537	21.1657	11.1851	3.07133	13.2711	11.8815	18.2466	0.104825	2.62947	0.784672	0.89259	2.8406	66.0522	0.969427	0.0261039	16.1707	0.0741173	18.2109	1.16451	10.7683	27.7681	4.53336	61.4229	17.9442	37.2439	87.7045	10.4433	36.7891
TCGA-24-1552	0.14934	0.0802947	46.8514	23.5161	0.0268871	37.4881	7.80907	3.41739	57.3435	170.683	32.8809	3.8497	194.489	108.496	7.39222	0.116186	227.359	20.9241	116.816	18.4855	221.88	367.257	193.61	23.0094	18.4058	26.9914	32.2618	120.093	0.484378	5.10206	0.815071	2.40122	5.65303	177.032	7.43603	0.286714	46.9304	0.168207	18.9265	0.90305	40.9385	71.6817	11.2192	135.441	28.2698	69.2177	126.691	15.7602	286.831
TCGA-13-0916	0.0267885	0.0336085	11.78	6.37273	0.021438	35.7327	8.10909	12.1061	30.7397	35.4465	22.65	1.74812	303.525	104.892	13.5637	0.197935	29.399	19.6807	104.665	7.07536	56.3514	118.06	45.9125	20.3095	4.55121	30.1985	49.6268	39.9807	0.243956	13.6846	0.881445	2.23601	4.42642	46.3413	22.7237	0.129406	19.6758	0.112191	9.87312	2.88057	5.44428	14.0105	15.2741	20.7313	15.3121	43.5456	230.36	12.7327	49.2965
TCGA-25-2396	0.0925808	0.028543	28.6264	2.41013	0.00724203	17.8864	1.29495	1.54943	13.3441	101.194	28.3872	0.319946	137.143	100.076	5.13117	0.0496478	50.933	17.6255	103.036	2.05209	95.589	63.6363	45.2187	32.2472	3.95484	22.1982	7.28176	30.6404	0.227494	1.87655	0.819483	1.62032	4.10938	79.3711	1.58037	0.061867	19.1414	0.154319	6.61658	1.86569	10.8743	31.9099	5.28687	63.3558	18.7681	65.3575	20.9571	11.3224	127.477
TCGA-23-1118	0.0303811	0.0112578	7.61977	1.47551	0.00434479	21.7714	3.51088	2.65937	18.216	66.6454	26.5866	0.556741	209.168	123.087	4.79645	0.0497715	98.1352	18.8663	137.963	3.73951	51.6965	72.768	63.5282	34.8607	4.28317	17.9534	21.5667	18.5248	0.157578	3.65077	0.836647	1.59649	4.65399	48.7392	5.18751	0.020113	17.1926	0.0697203	9.33249	1.03351	3.10069	24.4597	8.42732	73.4381	21.5479	53.9144	69.5284	13.1704	60.7177
TCGA-25-1315	0.154152	0.0149891	49.741	6.38491	0.0169945	47.6329	11.5262	5.39533	92.1109	57.2964	14.8739	1.21139	292.655	111.825	9.16025	0.0612975	82.2424	16.8061	104.083	6.72599	219.665	162.753	85.8053	16.2287	14.3637	14.593	53.262	54.8723	0.275431	11.6745	0.935834	4.79517	4.16165	174.08	12.1146	0.0845738	51.874	0.159197	22.0378	0.671954	19.7223	44.4025	15.7869	64.9815	8.07421	54.5184	182.933	12.832	116.667
TCGA-25-1312	0.172906	0.0773164	44.1102	11.5252	0.0270643	38.5401	2.4848	5.27159	63.8263	167.461	24.1579	5.14608	227.557	90.2022	5.74136	0.0665091	63.4754	14.8214	99.7588	14.8681	213.594	269.797	66.2529	17.9761	19.1016	17.5922	14.6686	99.2043	0.287911	2.32807	0.902647	1.86058	5.05073	273.757	3.76661	0.0778799	44.0014	0.114151	11.763	1.0716	25.6419	62.1225	11.7196	66.1553	16.8924	52.6997	75.8695	17.2077	172.951
TCGA-61-2113	0.0570664	0.00859788	14.1054	6.70943	0.00590825	19.4169	2.10741	5.13156	31.9451	41.0174	22.9466	0.752024	147.566	49.8467	4.40078	0.035383	46.1737	9.58273	85.5756	7.5777	145.614	133.521	38.016	11.0979	1.99239	16.0736	39.3898	59.4381	0.218289	5.9785	0.922669	0.983398	3.73109	64.2745	3.01372	0.0238288	14.0072	0.106816	19.3098	1.42106	12.1078	31.2699	8.8867	56.2083	17.4443	41.323	104.792	10.3343	50.2353
TCGA-24-1846	0.010235	0.00569564	4.29648	0.468802	0.00227221	9.24528	1.28683	2.42216	11.7433	25.4313	22.6938	0.48466	109.28	78.8771	3.9442	0.0274932	68.4348	13.1861	130.966	2.21559	15.0018	44.0303	39.5797	26.6381	0.927823	14.5798	19.6092	13.1262	0.146168	2.75073	0.901907	0.694659	2.7893	34.3213	4.37091	0.0101202	15.6063	0.078141	5.39643	1.18577	1.68636	10.2548	4.47201	47.876	23.6368	45.0366	83.7848	7.12673	28.7418
TCGA-13-0765	0.0624425	0.0190748	13.0735	18.0014	0.00672499	18.1177	32.1918	5.16933	49.4984	91.3553	25.114	1.29618	201.222	80.6225	4.31326	0.0393436	81.9997	17.5238	160.332	17.7878	250.772	75.8824	152.162	36.86	6.55095	28.7068	30.019	21.619	0.194117	2.72575	0.776863	1.91648	3.84842	50.6972	4.60296	0.0523177	23.7516	0.149649	22.3703	2.77554	6.61633	40.9894	9.48058	80.6709	37.681	47.7998	104.826	7.67321	82.3051
TCGA-24-0975	0.183608	0.0658725	53.5521	19.66	0.0225621	14.6315	5.85164	4.2419	76.7766	160.072	46.8435	0.909852	237.254	119.72	3.44115	0.0382694	148.005	16.0048	121.511	16.3993	67.9092	152.056	101.199	39.2816	13.0758	22.22	18.5336	31.6846	0.20201	2.66433	0.820994	1.42951	5.78294	164.561	0.659864	0.449653	36.291	0.222558	29.9742	1.99579	31.9653	91.1119	5.28447	302.283	41.8279	61.8808	84.5017	9.37427	145.465
TCGA-61-2095	0.0195494	0.0054938	12.8378	0.347691	0.00493934	24.3388	13.113	5.48367	41.7458	37.1316	13.5444	0.808056	98.7264	59.6384	2.47545	0.012422	20.3989	9.38464	75.1309	5.95726	14.2606	74.8716	39.99	14.2621	1.02759	11.399	14.4172	10.0875	0.0517398	1.83913	0.898226	0.148784	3.34412	40.8833	1.02044	0.0245257	13.2457	0.0767327	13.3237	1.17389	3.99232	11.2676	3.57234	68.3994	12.4728	37.5325	74.308	17.4709	22.8254
TCGA-24-1616	0.399435	0.171704	98.472	25.1317	0.0487995	55.155	4.20497	9.51747	70.6981	136.594	9.28047	3.27451	299.05	38.7012	13.7802	0.247494	112.649	9.89743	95.1936	19.8703	160.321	146.662	72.2641	10.5115	32.3019	9.86541	17.0586	89.6381	0.91728	10.2442	0.811812	7.14316	5.41858	585.728	13.3934	0.577609	53.4885	0.26871	16.2544	1.52806	47.1701	121.487	12.4514	142.6	4.56692	43.5866	198.949	22.5805	202.094
TCGA-25-2392	0.334604	0.157615	236.901	17.513	0.0427241	39.3334	0.733742	2.14027	25.2559	192.034	32.1709	1.22687	143.072	98.8381	12.5131	0.312293	226.492	16.4743	56.798	6.60316	127.087	208.093	72.4805	26.4586	18.9563	21.7747	41.2578	138.574	1.37861	12.5998	0.883655	2.93441	8.57285	345.015	17.5352	1.01391	40.4452	0.344755	8.67566	2.47117	58.1101	157.271	14.1653	102.912	59.1307	41.6935	134.422	13.0618	214.492
TCGA-29-1690	0.0675603	0.0313694	25.2849	2.349	0.0152537	42.9419	46.2038	6.72379	104.739	93.2278	24.5722	1.64829	98.0882	76.115	5.30222	0.0377337	110.522	13.5134	93.0322	18.3726	50.837	137.381	239.629	31.4833	8.13933	24.9793	36.5387	18.9763	0.0843716	2.65139	0.784071	0.349282	5.09092	121.273	6.57328	0.204301	31.8016	0.245439	27.8918	2.26497	12.7598	33.9421	5.61264	183.193	34.6867	56.7667	220.104	14.9311	66.8163
TCGA-13-0897	0.173723	0.153321	43.6461	24.363	0.0242131	24.8553	23.6825	6.52146	100.712	161.665	33.6988	1.50128	265.73	89.0926	5.90685	0.0757927	267.811	19.9243	156.455	27.8146	325.349	296.578	196.115	28.0573	28.2805	29.5217	75.0075	51.8232	0.516419	9.51334	0.786236	1.44957	11.5286	68.774	4.70225	0.290288	37.6504	0.29686	41.7522	3.33647	23.7844	129.533	10.2134	223.837	41.165	41.6177	423.225	11.348	157.208
TCGA-36-1569	0.0927295	0.0348518	38.6257	12.1886	0.0199102	25.1845	32.0522	6.14595	64.243	84.5438	26.2478	1.85429	140.662	87.4868	7.18611	0.0392874	83.8775	12.688	77.6307	9.56283	44.6348	193.47	54.6902	21.8084	6.92695	16.849	13.9444	28.1979	0.159897	3.77176	0.845962	1.50534	2.68816	198.504	6.82883	0.113132	31.1748	0.120885	14.3248	1.94667	18.7135	53.1092	5.21021	114.176	25.0987	54.8711	100.94	16.2824	81.6415
TCGA-24-1105	0.490949	0.171489	214.096	12.6266	0.0302766	24.4372	1.22459	2.9125	32.3761	153.165	37.0345	0.736313	208.254	134.222	4.9172	0.0787063	219.344	20.5414	102.736	9.34759	101.667	204.994	70.7723	29.9675	20.412	23.5253	16.9548	59.2117	0.455741	4.94636	0.981767	2.70051	8.50971	250.844	5.5822	0.445672	39.9068	0.246618	14.2359	1.4207	61.4026	125.999	7.93417	87.4907	36.4393	67.1785	61.0504	10.387	186.706
TCGA-25-1328	0.0313898	0.0123525	21.5763	1.51173	0.00786199	23.3294	21.9096	4.40244	49.8356	40.5759	18.421	1.33309	107.292	71.5444	4.44915	0.0152906	29.1423	10.1853	89.1727	8.08896	6.37532	83.6327	39.9787	21.3235	1.76034	13.1217	16.7862	13.0949	0.0708041	2.21524	0.882706	0.671675	2.93697	107.789	1.70265	0.0627343	18.8128	0.108243	12.8015	0.720417	5.93377	14.8481	3.2072	64.5133	16.6329	55.354	61.304	14.4696	35.8009
TCGA-09-1659	0.0554534	0.0121741	9.63718	8.95354	0.00703991	24.0111	78.0369	6.11806	67.9869	99.0319	19.5312	0.589292	185.869	94.219	4.70432	0.0217114	93.5961	14.1465	156.929	6.97974	120.731	73.4227	195.629	30.0131	3.50432	20.4336	17.75	8.62143	0.0639295	1.56233	0.658498	1.40876	1.87877	21.7458	1.95575	0.026037	28.6298	0.0491941	22.6563	1.42403	6.18832	19.8311	7.61202	115.279	16.8222	42.9185	80.1259	20.7051	33.7863
TCGA-24-2033	0.172429	0.0284848	60.736	8.71015	0.0107574	26.6625	7.45435	2.4209	24.6028	142.59	20.8237	0.734383	209.977	87.665	5.67158	0.0214692	91.5768	12.0069	98.011	6.19878	127.075	75.6946	48.8252	22.7702	3.83668	13.2907	8.50425	30.0456	0.127391	1.65656	0.831288	1.03225	2.58951	173.727	0.945384	0.0487258	17.376	0.106337	11.4109	0.701278	25.7569	49.4215	4.79827	71.9305	14.0526	62.9082	48.3092	17.2512	116.754
TCGA-24-2298	0.288162	0.0747823	113.362	24.7803	0.0247568	35.2162	1.44431	3.22512	45.2194	139.8	41.4357	1.34014	150.906	82.3537	9.58918	0.0920953	130.115	15.0488	103.84	9.14084	145.301	227.399	57.5249	21.7537	11.389	21.3591	49.4699	97.4745	0.956602	10.2466	0.910124	2.21719	9.61494	749.621	6.96894	0.354747	30.5418	0.393278	25.986	1.66316	49.0918	137.24	14.774	121.163	47.3302	61.2349	119.054	19.5171	157.381
TCGA-36-1575	0.0138201	0.00181436	7.35127	0.507304	0.00248572	6.91367	0.471618	1.05264	18.4201	19.245	20.4188	0.401783	154.168	159.795	1.07045	0.0155041	20.6582	14.9179	88.0519	1.34636	38.7231	40.5	15.2625	12.5603	0.32481	10.1474	8.03368	14.9779	0.0651294	1.46565	0.908609	0.823765	1.61726	31.6495	2.28412	0.0059848	8.25763	0.0407406	4.28355	0.359808	1.99976	13.4386	4.48291	22.2562	8.73111	56.2773	18.7585	6.69531	17.1539
TCGA-59-A5PD	0.140801	0.00600561	16.9041	1.79274	0.00517351	14.0388	6.80992	2.133	39.135	51.8034	20.9696	0.510352	312.847	91.9224	2.68242	0.0236611	56.1385	14.0321	98.4606	4.00924	149.935	120.116	44.8389	14.2545	8.08532	14.6078	25.3165	23.6345	0.299429	7.56129	1.09673	0.387347	5.59696	104.157	9.21724	0.010645	10.7818	0.0948118	10.5224	0.348005	14.2658	26.4347	6.48596	72.6586	15.5362	50.3852	128.249	7.0291	52.7282
TCGA-10-0938	0.0257706	0.00502675	11.5479	1.39256	0.00355735	22.5422	5.18545	2.05648	17.8419	38.5751	15.4079	0.85361	422.684	116.871	4.7642	0.0402004	23.1089	15.1747	97.5683	1.71122	183.548	54.482	86.0952	15.7053	2.58978	13.9767	14.6736	7.29098	0.0713237	3.72418	0.821028	1.47072	1.24667	46.7897	7.48371	0.00906599	23.2188	0.0653127	7.17794	0.414551	2.52512	14.3005	6.2207	23.2743	7.09884	59.9309	78.819	14.45	25.3874
TCGA-29-1693	0.195902	0.0470894	24.7024	30.305	0.021332	36.2498	45.5727	17.1734	108.869	129.052	29.8561	5.44587	156.58	87.0033	13.1265	0.0563663	337.812	14.9588	130.962	64.9493	249.721	285.656	119.588	31.1397	23.4526	15.77	54.4372	97.9816	0.458662	8.40406	0.702706	4.67622	3.86801	183.677	4.75316	0.235046	44.4428	0.0658064	31.1075	1.19981	29.4958	192.836	16.21	165.55	22.9718	49.8623	469.229	18.9778	104.356
TCGA-13-0920	0.0881185	0.00746101	12.4747	2.24545	0.00551903	18.254	19.6665	2.12348	26.0678	50.887	20.2895	0.727648	196.329	125.008	4.39983	0.029683	95.7901	15.8803	132.689	3.34509	168.627	105.213	45.8745	30.1263	5.70366	13.5276	17.8411	22.9813	0.134282	4.61774	0.781157	1.96819	3.10829	78.1834	5.37957	0.0157773	31.3312	0.0541619	8.50729	0.418236	8.39384	22.126	7.2946	71.7372	11.3082	52.9994	129.459	10.4931	66.2843
TCGA-09-0364	0.0128233	0.00562291	3.55383	0.203392	0.00572063	13.7438	4.68959	1.97561	31.9474	22.342	25.2205	0.79919	411.014	282.739	6.00197	0.0425179	29.5215	21.9655	109.719	2.01224	5.17806	38.573	22.3834	23.7809	0.684331	22.1362	18.6533	14.4777	0.113251	3.38884	1.15912	0.579807	2.36503	67.3417	7.85137	0.0281009	7.64659	0.0740508	4.19096	0.294723	2.5451	4.77999	6.10759	38.4978	11.7292	69.0437	103.286	9.84842	20.0494
TCGA-13-1489	0.048284	0.0132704	5.51298	6.43185	0.00783188	17.171	96.0541	4.12521	54.0772	97.9327	11.4679	2.11119	185.693	92.7947	5.39576	0.0632583	110.69	12.4741	129.942	11.882	220.545	208.007	168.487	21.8149	12.2685	9.70552	44.218	16.5256	0.187264	8.45629	0.719646	1.12564	5.85804	72.7998	17.8637	0.0227371	45.6808	0.0559248	21.1099	0.411959	5.30531	31.5485	9.7255	86.673	8.83085	42.3535	180.696	15.5602	70.6292
TCGA-57-1583	0.067741	0.0402179	43.3142	2.25939	0.0104782	20.8803	0.747794	1.56262	8.61522	68.2276	24.5297	0.527121	296.651	127.043	8.5044	0.0760054	44.3673	17.2345	115.962	3.18456	92.3063	78.2754	42.8422	31.7976	4.38484	21.1634	15.025	33.8985	0.284507	3.47052	0.992969	0.98771	4.13556	294.597	7.413	0.185296	26.8411	0.112814	6.32709	0.899527	10.6713	32.6873	5.22447	46.0623	16.6193	76.5382	31.7197	9.70258	75.7919
TCGA-61-1738	0.0884051	0.0649971	16.0352	12.0937	0.0136933	24.9072	23.643	8.06749	113.918	133.241	38.0711	1.61509	238.771	94.8258	4.35421	0.0977538	203.498	21.6834	146.456	22.7026	435.226	139.947	163.932	29.6363	14.8337	40.3533	36.1073	77.3817	0.204837	3.04769	0.841349	3.62849	5.04908	36.4683	8.50786	0.129885	19.2776	0.0448751	27.6491	4.09587	16.4921	48.8712	21.182	92.9564	36.0755	43.3104	370.806	13.1182	82.5199
TCGA-25-1321	0.374031	0.146615	265.161	15.359	0.0270607	31.8377	2.00297	3.30391	44.2548	163.753	42.7298	2.20284	281.139	156.339	7.0449	0.216352	122.635	22.4673	91.3708	7.99903	138.548	186.049	68.0687	33.6219	25.4132	23.8097	19.0359	103.112	0.633821	7.1395	1.12009	2.32484	8.00052	1242.71	18.2354	0.290188	61.5035	0.209995	15.3502	2.3675	68.7927	206.946	9.70502	65.3741	38.2247	80.3658	104.723	13.6375	180.647
TCGA-29-1776	0.0951392	0.0389053	48.9503	10.5676	0.0175111	26.9812	41.414	8.8263	86.3255	65.3717	29.0076	2.57901	250.838	114.8	6.00208	0.0385939	125.749	15.0602	108.76	24.496	129.619	135.911	105.636	24.3832	13.8307	21.6807	42.3955	31.2269	0.243635	6.88728	0.899411	1.68345	2.73085	219.884	4.89586	0.0955054	65.0139	0.163453	27.9137	1.09071	17.9976	50.0284	6.62886	76.0362	24.6305	59.4065	206.132	15.1623	92.453
TCGA-61-2102	0.0523293	0.00408865	2.92674	0.355899	0.00315259	21.1671	7.34686	4.5013	32.842	16.3645	11.6399	0.513947	142.438	54.8026	11.0499	0.0163817	22.2351	7.16824	69.0397	3.42342	6.88623	68.2784	9.23518	8.67065	0.603987	7.64378	24.229	21.2246	0.0711349	3.18204	0.723332	0.935776	2.64153	29.5817	1.05365	0.00819828	11.8395	0.0389364	10.4645	0.345623	5.61959	29.3264	2.95475	40.9885	2.96317	44.4792	62.3994	11.5939	29.3946
TCGA-13-0888	0.18607	0.0228826	38.8383	5.55462	0.00812841	34.9765	2.68383	2.91208	48.4094	90.3757	28.0398	1.17119	188.704	136.926	6.83527	0.06255	134.617	14.242	103.368	8.65281	81.3573	98.0839	54.2812	21.248	4.19181	11.306	12.742	56.0499	0.249613	2.80154	0.773189	3.07079	5.36938	132.025	1.29795	0.0457858	28.268	0.160506	19.7175	0.408847	17.1006	94.5665	6.43136	160.744	11.3401	42.9206	78.2478	16.082	59.9304
TCGA-61-2110	0.0563473	0.076067	30.3407	2.99562	0.0119771	28.5066	5.35306	3.08799	35.555	121.379	10.5134	0.812811	284.703	64.2724	5.6987	0.040128	71.8572	11.2331	132.926	5.03185	62.1641	82.3669	74.0662	20.8146	3.45218	8.24371	12.9836	28.0881	0.107438	2.31822	0.89667	0.726745	3.49063	235.373	4.47958	0.108773	20.4288	0.101358	8.1218	0.569136	8.82942	17.4638	5.81572	81.3808	5.46636	62.5028	55.9348	16.9901	93.3705
TCGA-25-1623	0.247522	0.0157865	38.4984	8.18432	0.0089181	25.6263	4.61454	2.88175	24.4643	64.8833	23.2664	0.749455	98.8006	50.7299	11.4805	0.0182704	63.1216	10.9445	80.7728	5.75295	63.4078	170.436	24.7029	16.4621	13.7745	20.3812	15.6715	72.7475	0.166639	3.22006	0.828532	1.69457	3.83486	82.5051	1.39251	0.0414136	28.1586	0.113508	11.9655	2.10441	45.6691	69.0468	4.97867	108.015	23.8787	60.771	82.4627	14.474	153.92
TCGA-25-1317	0.0759372	0.0263793	24.1778	3.39952	0.0107744	25.5408	3.30843	2.80851	28.938	62.2413	33.3289	0.923275	236.514	173.087	5.19349	0.0341589	109.117	17.3033	95.9216	6.71454	43.7528	104.875	32.6794	29.9536	8.11243	23.6797	8.33566	33.1751	0.078441	1.79445	1.02294	1.05022	5.03541	167.086	3.36642	0.0433206	28.7972	0.066624	12.6506	0.950762	9.75728	37.2211	5.21359	106.971	29.4029	80.791	37.1873	19.7241	55.9424
TCGA-13-0762	0.391957	0.0406686	55.2807	7.73272	0.0115034	26.1014	5.05193	3.88995	49.6973	114.093	11.9559	0.484992	212.618	92.7001	5.73034	0.0586854	95.7472	12.5026	100.256	5.06211	121.571	87.4897	56.8387	15.7037	18.7409	11.8156	12.8731	36.056	0.19478	3.03699	0.810346	2.9606	4.16378	172.663	6.41447	0.0706692	52.8491	0.138689	18.9049	0.839987	22.9342	53.4116	7.92075	64.7297	9.46129	43.891	90.2818	13.6669	67.8472
TCGA-24-1436	0.232718	0.122949	77.2261	18.0805	0.0251323	20.7035	1.01503	4.20222	28.0347	108.987	35.7985	0.691911	176.536	72.2793	9.10554	0.0833521	102.095	15.8667	98.2609	8.39592	223.526	167.33	42.0608	19.1498	12.9536	27.1577	34.46	139.288	0.679732	6.56279	0.985531	1.44332	5.09762	301.645	4.40256	0.200159	26.7009	0.141533	19.8788	2.30617	44.371	118.415	12.4889	71.8195	46.0331	62.9139	87.6469	11.0524	123.959
TCGA-23-1109	0.0715421	0.0337388	39.8755	3.97856	0.0115679	27.5041	2.82549	2.30202	28.2753	111.452	30.0237	0.664842	307.782	121.028	4.76395	0.0274733	104.126	15.486	117.316	5.21896	125.811	49.6238	61.7728	20.7364	5.58605	20.0832	25.161	25.1998	0.147166	2.57254	0.825039	0.768459	4.02432	68.2379	0.732705	0.0616934	15.9027	0.141661	12.1827	0.993718	10.8376	52.7553	6.34349	107.581	15.8468	50.9252	42.6306	15.6763	87.6195
TCGA-09-2044	0.116009	0.0188709	4.86815	6.29988	0.0134799	43.8442	65.5484	7.41461	21.7287	116.079	15.2368	0.563924	347.041	45.3291	18.8554	0.048747	175.037	11.5909	167.093	6.92231	677.311	156.527	49.1818	18.4276	6.55934	15.7438	28.0376	25.505	0.171186	7.58749	0.703285	1.62422	2.81985	19.9406	3.68565	0.0273724	24.2446	0.0941014	16.4039	1.1773	16.886	30.5802	17.2583	70.576	8.48302	43.6536	183.015	24.8476	87.4344
TCGA-13-1404	0.202299	0.0474809	62.7029	10.4438	0.00855423	24.1753	5.32389	3.06082	31.9319	92.095	20.644	0.608834	181.752	103.473	4.25655	0.0401721	163.066	14.6817	132.17	7.03645	124.177	93.9782	77.7284	24.0377	3.64746	11.9825	24.479	39.9723	0.480299	4.12888	0.765173	2.61663	7.1722	228.755	6.18106	0.0912673	23.1835	0.177025	12.6282	0.661196	22.7634	52.2166	6.55545	91.7995	13.7452	41.3431	165.856	11.7093	136.201
TCGA-61-1914	0.409659	0.0834503	60.5979	31.1435	0.0391898	44.1338	21.3613	10.7662	52.1073	284.92	26.7053	5.18185	171.93	64.0014	7.85976	0.138733	316.37	11.4066	108.651	66.3972	404.485	234.065	204.733	30.5167	39.4716	14.0099	32.5309	129.846	0.458071	8.31441	0.658345	3.52958	4.05303	181.719	3.29503	0.269472	60.353	0.0928915	30.5692	1.24301	54.9346	107.178	34.4988	110.713	23.2632	35.6412	344.752	17.1912	192.308
TCGA-13-0884	0.119093	0.0362694	49.7429	7.88243	0.010291	50.1106	1.36614	1.57615	21.0898	112.629	31.4805	0.533589	169.123	127.695	8.36655	0.0432769	81.3457	17.6546	123.018	4.43547	93.8968	67.0273	49.7321	36.5151	7.26782	20.07	14.897	36.7601	0.198386	2.99127	0.820661	1.91317	3.76863	223.742	4.49503	0.0842544	22.9651	0.203241	10.1229	1.12304	12.4009	60.829	6.56387	92.774	30.5972	69.7308	29.1815	28.1788	98.7209
TCGA-24-1557	0.203159	0.150402	49.1591	20.4476	0.0244737	23.7477	3.54956	7.05498	43.3469	86.2469	30.5684	2.09978	326.62	103.669	4.6622	0.116448	114.503	18.0289	83.2782	16.4726	183.291	257.093	49.0111	20.7237	11.6495	24.5043	19.0884	59.3381	0.360389	6.98291	0.934336	2.42659	8.81057	261.195	13.8888	0.158358	32.7929	0.140691	20.6977	2.83452	31.3797	79.9242	14.609	52.6738	29.6052	49.205	98.6576	13.5535	96.8248
TCGA-09-1662	0.0784099	0.0462685	26.244	4.25183	0.0106564	17.2373	2.83463	3.71447	49.6326	78.4897	24.6501	0.708078	223.567	102.388	3.90161	0.0563083	89.968	14.8255	103.151	6.09509	47.565	92.1166	59.7409	20.3	5.18005	18.8307	18.6792	19.0212	0.197144	3.15403	0.983974	0.961539	3.84386	186.731	5.04886	0.0913604	23.7211	0.155716	11.4165	1.32649	13.7056	35.9143	5.20872	102.338	21.553	49.1488	74.143	9.90914	85.2729
TCGA-13-1492	0.220899	0.0910821	27.4641	50.7525	0.0229687	73.0922	0.531249	6.8815	64.8617	69.5899	17.928	2.8791	931.289	70.8768	15.8933	0.0921665	92.126	14.5379	91.8835	26.7749	1939.04	215.951	45.2628	17.3892	7.38005	20.6849	32.8681	176.665	1.03917	10.2943	1.02343	5.23935	7.64311	1173.93	43.7676	0.149733	22.4564	0.199614	28.3284	1.3507	30.4309	150.365	16.5661	54.2206	11.2882	42.4323	309.336	35.8309	141.99
TCGA-29-1701	0.121599	0.0121268	9.90087	2.77019	0.00949118	73.4693	14.4817	4.07303	21.0907	129.044	45.8661	0.74935	242.255	85.2583	11.4593	0.026548	237.535	12.8733	140.091	10.5285	324.887	108.735	123.267	38.1625	11.7283	19.64	21.493	54.5713	0.15222	2.48974	0.657273	1.95949	2.19574	31.6606	0.466461	0.0388967	19.6103	0.0812733	18.5642	0.722335	14.5797	30.7286	10.1122	85.6969	27.1814	56.8562	89.9624	29.6253	94.5836
TCGA-29-1768	0.0305304	0.0070641	3.61121	1.51892	0.00373602	14.3269	50.7133	3.79972	18.9828	29.1185	21.9794	0.612752	93.9175	38.1908	2.99235	0.00970218	31.1216	6.8728	87.5721	8.65646	13.6551	46.6059	26.8761	21.9058	1.31994	13.6879	13.6142	8.63677	0.066132	2.61819	0.619963	0.902967	1.60239	25.0104	0.222954	0.0153402	14.0468	0.0600242	13.9696	1.05689	3.86828	10.2916	5.08945	74.1788	17.757	45.5821	77.7001	8.10788	25.9301
TCGA-31-1944	0.116913	0.0245083	67.7722	7.2074	0.018492	33.135	14.0899	6.87639	47.3579	167.689	19.7138	1.22546	232.893	77.5156	12.0346	0.0801042	85.5419	12.3752	83.8109	8.75052	201.397	189.119	149.174	16.7973	14.0567	15.0168	45.6935	51.6519	0.458913	9.79241	0.979347	0.793613	4.55549	100.064	13.8379	0.0877849	32.8196	0.283314	22.3306	1.3109	22.8802	70.8759	9.92852	81.9943	18.9432	57.5176	140.055	19.0302	145.752
TCGA-61-2002	0.0441649	0.00590752	13.4754	0.932028	0.00408929	15.1194	45.4283	2.94544	30.7208	49.5037	23.1232	0.569849	133.666	47.9325	3.53631	0.0170894	34.3577	10.5069	108.292	6.96003	37.8532	58.6815	38.7274	21.5629	2.00452	14.9059	12.1818	5.05362	0.0630722	2.56492	0.828027	0.406051	2.53354	33.8393	0.842983	0.0194404	21.6164	0.083296	13.1626	2.06912	6.59173	21.4055	5.37341	50.1363	20.7377	36.2615	115.642	10.0907	50.7315
TCGA-04-1364	0.0632443	0.0129381	27.9836	3.18864	0.00537122	14.8575	3.59643	2.0248	19.1192	82.0409	17.8843	0.318589	278.18	103.87	4.2585	0.048464	70.2123	14.0773	88.9265	2.51477	207.792	90.674	37.6943	15.4849	16.508	15.4172	9.05292	30.6986	0.0787599	2.98226	0.759176	2.56227	3.28544	81.8166	7.54289	0.0191042	46.5135	0.0432005	8.14707	0.594528	10.9579	55.0053	8.629	44.0906	10.2225	61.8234	36.6753	11.2954	80.367
TCGA-VG-A8LO	0.0979659	0.0239621	46.189	1.42786	0.00925615	25.069	1.56781	3.49077	28.9744	80.4534	23.4857	0.863776	175.561	125.085	4.01883	0.0655072	95.3118	19.9573	100.186	4.42489	121.787	189.897	79.7071	20.86	9.12329	18.4836	25.4536	44.2996	0.369079	4.87417	1.13315	1.28853	7.7198	189.783	8.75212	0.046522	24.4333	0.195367	11.2965	0.782428	12.1234	38.2247	6.39962	85.4529	21.7623	65.9731	123.266	12.3242	100.328
TCGA-61-1907	0.0723963	0.0301805	16.5627	11.2131	0.0146502	54.6754	16.5747	6.60953	47.0198	70.7516	22.2489	2.24272	166.566	44.9576	18.8813	0.0870259	131.923	10.978	109.706	16.8739	384.709	79.1478	101.243	21.6563	6.96981	15.625	94.8806	42.7591	0.94084	13.9874	0.753117	1.3759	2.56852	69.4186	10.5908	0.102552	35.4398	0.229619	20.3844	2.04357	8.26628	32.9214	19.5581	44.0893	17.7076	33.6786	239.648	16.1259	57.4235
TCGA-29-2427	0.0374311	0.0193502	8.76654	4.10183	0.00694944	18.5344	3.34613	6.54498	25.7295	37.683	19.1321	0.753114	73.3787	31.8285	4.30455	0.0541002	49.8374	8.77592	78.5826	9.80639	45.0426	96.1425	50.2741	14.2786	4.4052	14.9187	11.1357	34.6219	0.114154	3.05278	0.603799	1.61339	2.96207	23.7143	5.15688	0.0255842	17.9865	0.0684494	10.5581	5.43638	5.36074	18.1309	7.91198	38.0561	25.8086	20.4513	89.6772	8.62692	25.0056
TCGA-25-1625	0.266541	0.0831245	143.501	31.2585	0.0159937	16.0819	20.4022	17.9543	59.1557	93.178	25.8826	1.11358	123.214	45.5003	4.27979	0.0631784	93.4941	11.1875	92.588	18.1291	217.391	269.604	117.334	16.4663	14.3769	17.8943	18.8836	100.41	0.207827	2.7354	0.783085	1.47642	9.12011	341.956	9.48326	0.157371	35.679	0.163625	22.9064	4.12412	65.2269	59.6331	6.0431	82.748	45.7716	33.1228	274.951	11.7138	147.451
TCGA-04-1356	0.115234	0.0180585	47.8403	1.65023	0.0127657	26.8466	7.50754	2.61579	40.3671	103.458	22.9912	0.495563	251.707	157.642	4.30536	0.0621798	189.048	20.1335	116.894	4.4121	106.487	141.154	91.1712	27.4003	10.5062	19.8009	40.6061	21.4414	0.613748	7.63763	0.918923	1.27588	6.05784	96.9653	5.26749	0.119583	24.4527	0.11224	12.1326	1.2328	12.9368	61.7178	10.0775	153.956	17.4415	41.7983	57.581	12.1588	81.1206
TCGA-13-1505	0.0927415	0.00536439	29.2081	3.71463	0.00500279	24.2038	5.63753	2.40792	23.0473	40.3856	19.7999	0.745473	156.421	77.6821	8.31345	0.0263467	53.9261	11.383	78.224	4.30564	54.944	71.0002	25.0605	14.1193	2.11577	13.3654	14.8349	22.4082	0.182925	3.85838	0.819754	2.0842	2.90667	118.112	4.80606	0.0308492	18.577	0.135049	10.1703	0.717812	11.2534	33.5663	5.21203	51.6354	12.2504	54.4926	111.362	11.5951	67.6731
TCGA-24-1413	0.0808282	0.0621142	22.5367	10.202	0.0221788	30.7836	14.9749	6.81718	72.613	69.4526	19.6245	1.60571	166.696	103.465	7.70372	0.11429	92.4688	17.695	93.575	7.53104	68.9843	146.706	78.9948	18.0986	11.6009	19.0822	41.2191	42.1084	0.262856	8.93779	0.974524	1.41697	4.19105	145.048	21.4248	0.0938211	30.6635	0.147162	21.3459	1.55009	13.0647	40.2534	12.2092	80.497	20.5873	63.7312	90.4539	16.5659	44.2788
TCGA-24-1431	0.116613	0.0277199	29.1825	7.85619	0.00916459	17.3285	11.5947	2.84825	32.7188	131.624	16.4878	1.55182	187.699	86.3025	3.26394	0.0265205	126.268	13.5443	119.668	7.48319	202.811	160.231	52.9533	21.5471	7.36355	14.7826	11.7292	33.666	0.174625	1.67527	0.775111	0.876148	4.61873	162.128	4.04059	0.0292695	20.6237	0.0994414	8.6246	0.93168	15.7725	47.1694	5.85277	87.2579	18.8473	42.0254	117.157	12.8616	108.274
TCGA-13-1485	0.0936079	0.0377653	58.8805	4.57874	0.0125037	40.6072	3.97898	3.59305	36.8159	68.2156	24.3716	1.45062	146.013	89.7982	8.95551	0.0337212	77.6257	13.0903	93.6687	14.2608	3.28686	125.852	64.8457	24.8848	8.93048	16.9646	25.0782	47.8512	0.17002	4.53682	0.832867	1.2349	4.59414	254.396	3.47196	0.292987	28.3009	0.143511	15.7328	1.26836	13.5011	52.9968	6.62145	124.43	28.4076	69.8854	51.1677	18.5971	74.6449
TCGA-24-1464	0.119585	0.0150493	40.8776	2.1216	0.00612961	42.3152	1.75556	1.63733	18.3347	123.853	32.6159	0.79588	164.184	205.539	9.56731	0.0713298	144.192	21.1234	132.413	3.97175	102.298	101.859	92	52.3317	7.83123	17.3418	25.0671	22.2725	0.276409	6.02637	0.791147	2.72189	3.71957	171.245	4.76376	0.0338411	24.2751	0.107048	8.78487	0.948775	10.7767	73.2508	9.25098	87.4382	32.1665	57.2016	65.5002	18.7031	76.4053
TCGA-13-1501	0.311334	0.099902	56.3924	15.5044	0.0273131	39.4641	6.42541	4.53333	20.3979	136.246	33.1392	1.66382	288.793	85.5107	7.49535	0.0472833	123.191	13.3124	101.154	14.4165	145.584	146.34	79.5762	32.885	19.1341	18.6142	22.9149	51.2751	0.413578	5.83759	0.778903	2.09856	4.89764	226.395	2.15657	0.352118	46.0936	0.268882	22.9222	1.1891	53.9008	96.0275	10.7834	104.412	26.7028	59.854	203.766	18.1595	132.51
TCGA-29-1710	0.0882589	0.00890987	15.8538	2.97121	0.00584706	5.7426	14.809	7.92653	44.766	45.1765	21.3961	0.633658	74.5586	36.7054	3.01378	0.0176185	68.1589	8.4662	70.4949	6.51812	102.51	119.58	34.7373	11.3847	3.45374	15.3413	13.6149	42.7335	0.121568	2.6746	0.767299	0.440694	3.07523	55.633	1.96498	0.0243923	20.3652	0.0693916	17.5602	4.44441	14.6615	60.4524	4.62346	66.6462	27.3261	30.9884	75.107	3.72537	43.6202
TCGA-04-1530	0.0318558	0.00690458	12.1782	1.01181	0.00682287	25.4974	7.44845	2.94931	32.0708	44.4647	18.2776	0.513688	188.152	62.2002	5.77642	0.0176004	63.7166	11.016	92.3357	4.85102	71.52	69.2622	39.6507	15.3324	1.38112	16.1884	20.1449	22.6935	0.163898	5.15534	0.906745	0.610992	2.93151	42.8414	2.23278	0.0234062	10.4313	0.137945	16.6895	0.749919	3.92115	24.5346	7.43904	64.2605	10.8527	51.5649	65.4162	14.2348	25.6328
TCGA-61-1998	0.0583604	0.0194448	11.1514	2.24427	0.00900763	24.3019	6.51899	3.77087	56.9451	65.3084	27.2173	1.11412	228.249	83.3419	4.79524	0.029445	79.6998	13.0167	87.6159	10.1663	52.1671	106.251	56.5938	19.4639	5.57777	21.9819	16.7803	26.7136	0.167953	2.40845	0.845203	0.728999	5.72806	68.265	2.06758	0.0379353	27.3562	0.121918	19.8191	0.936947	8.82929	39.3272	5.38038	122.081	19.8149	53.2505	106.1	11.0376	51.1787
TCGA-24-1417	0.0267895	0.0197478	4.08025	5.13101	0.00648839	13.6008	3.94324	4.37931	23.9382	40.0343	27.3535	0.809938	120.449	56.7336	8.23782	0.0387457	55.4379	11.5932	94.0386	4.54871	52.7469	99.7711	20.4621	15.4051	4.01733	16.6756	23.6739	46.133	0.143434	4.86257	0.87134	1.98548	3.19926	62.9389	3.78174	0.0196507	15.9282	0.0683735	10.5171	1.93587	5.29241	20.8692	7.8575	65.7562	28.1963	50.9007	68.6024	9.24546	53.1464
TCGA-31-1950	0.26424	0.0899386	114.235	14.5391	0.0550438	32.4378	1.49916	6.30819	73.6332	113.37	34.1297	1.45809	193.414	89.9677	9.02029	0.217489	97.6986	20.1152	95.5288	12.5488	627.54	197.204	71.1442	15.4103	15.5782	22.9195	31.722	190.395	0.848891	10.0728	1.03748	3.11207	4.04773	266.425	15.058	0.394391	28.5337	0.264998	22.8872	3.2098	40.4208	140.696	13.9288	61.5633	26.6615	49.419	92.4016	16.8098	108.797
TCGA-29-1770	0.124911	0.0606441	16.0653	10.8777	0.0165326	40.4232	40.4866	7.67823	35.9825	70.9996	26.6792	0.960944	184.101	58.418	6.70838	0.0204436	90.3724	10.7523	95.879	9.78925	125.761	187.287	44.1424	22.5109	11.4759	20.641	14.7067	21.1643	0.0955009	2.94881	0.68554	1.3733	2.80113	52.3932	2.15664	0.0798822	22.0635	0.107645	16.584	1.35291	19.5117	32.9676	9.83493	63.7526	25.8782	57.659	79.2537	14.7144	69.7279
TCGA-13-0883	0.0331732	0.0159309	14.6787	2.23361	0.00960763	18.4252	17.0091	5.03871	46.083	41.4562	20.8988	1.6449	113.796	80.4482	5.0741	0.0213324	56.7197	10.6301	91.8618	10.89	7.44636	157.845	45.3531	20.6655	4.47148	15.905	19.9484	20.1251	0.0740681	3.19659	0.906882	0.847901	3.71869	84.9725	1.55726	0.0738945	34.3223	0.0818604	18.0696	0.640547	7.75511	18.6056	4.81092	75.3693	17.9088	75.4334	67.9893	12.9946	44.9191
TCGA-29-1762	0.0917252	0.156746	17.9728	6.77326	0.0374477	62.007	4.62669	8.56041	45.6219	116.103	1.60942	1.01836	1383.12	6.93782	17.8119	0.0546391	225.998	2.6231	81.2498	11.5104	439.494	212.262	224.79	3.1379	29.3556	5.67539	21.3597	80.7906	0.511932	4.37506	0.763446	3.30554	5.77917	108.729	15.3077	0.191296	61.7825	0.236869	18.3283	0.0783818	10.8359	48.9747	9.88331	92.9154	0.201594	47.5937	420.714	28.4886	100.177
TCGA-24-1555	0.136538	0.0384955	64.2856	7.37342	0.00951144	22.5055	5.27481	3.34499	27.6675	71.941	24.3762	1.53332	162.304	111.225	4.71227	0.0757232	74.4814	17.2129	119.341	7.18458	132.069	82.0232	40.2195	33.5718	3.94025	17.9572	14.8151	37.9446	0.276598	4.49853	0.901487	2.8775	3.79128	598.301	14.5385	0.0691952	30.1636	0.160236	8.29477	0.823478	22.3401	48.7415	5.66782	38.8723	24.3935	66.9292	58.0178	12.5083	121.201
TCGA-36-1576	0.0648101	0.0112355	12.2013	4.40657	0.00777113	23.2256	4.79621	3.30254	33.557	43.4571	21.6974	1.00397	146.212	44.3304	6.62654	0.0130703	55.2548	7.93182	75.4697	8.60467	40.004	141.896	18.661	13.6795	5.99632	16.0138	16.2905	34.0294	0.130946	3.65796	0.766519	1.16491	4.23999	71.7753	1.42416	0.0414088	28.2844	0.0851124	13.0823	1.28794	10.564	35.7548	4.9266	69.2499	16.8429	50.2937	103.559	11.1325	56.728
TCGA-24-1430	0.2028	0.0494251	63.3866	8.12746	0.0193095	18.3219	1.27082	3.51359	41.2797	82.7762	24.4991	1.6365	226.573	128.544	3.92929	0.0648155	77.8713	14.9215	86.4403	8.46422	248.587	214.73	35.1973	16.593	7.15941	13.8362	11.854	49.7599	0.196713	3.27282	0.950526	2.57792	4.25125	628.616	9.98156	0.214303	28.9891	0.136945	15.2558	0.574353	32.9132	97.0368	8.58884	53.1611	13.561	63.9331	63.3103	10.0991	92.7529
TCGA-13-0919	0.105373	0.0266963	25.9556	8.61747	0.0117764	28.4331	6.83576	2.91269	39.1384	90.167	29.5567	1.00576	245.564	89.5851	6.2742	0.0401183	101.011	16.619	126.286	18.5677	62.9703	114.758	88.0809	33.5003	12.6514	26.6621	23.7053	21.4382	0.363495	4.06026	0.818351	1.08856	6.9128	65.746	3.42951	0.192511	38.4365	0.217158	18.787	2.95556	13.0239	56.3474	5.60686	106.81	40.966	45.4258	141.854	13.4585	96.3241
TCGA-30-1857	0.141255	0.0369812	33.7952	8.15694	0.0117503	31.8116	6.268	5.7191	41.6152	163.556	20.4495	0.649113	158.143	52.4154	4.90495	0.0265451	110.877	10.4138	99.1577	14.3297	261.909	117.888	132.073	17.782	11.4862	19.0379	20.2717	56.6769	0.31965	3.81327	0.73369	1.32843	4.98337	108.345	2.05109	0.153248	26.0098	0.195998	32.1498	2.43947	23.4498	81.3441	8.74941	107.702	25.4959	45.2248	91.7352	12.4423	84.3857
TCGA-09-1673	0.4252	0.0287669	163.409	5.60782	0.0175261	90.5067	14.261	5.03943	46.2626	93.6128	17.9628	1.98942	152.146	97.6976	30.7722	0.133261	129.093	11.9125	91.7181	4.83487	426.793	197.852	79.151	26.5701	8.64331	8.2795	70.1124	98.4082	0.522093	16.665	0.900216	3.65747	4.02982	1465.71	21.0489	0.172496	35.1159	0.249472	17.4848	0.35279	52.6465	189.009	10.203	60.6588	11.7756	73.7428	53.3162	27.1353	94.7193
TCGA-29-1783	0.0976931	0.0218806	36.6936	2.75623	0.00914527	17.1147	4.04972	3.29883	27.6293	75.5117	17.347	0.747446	181.416	72.0909	4.38568	0.0255235	46.4254	12.3512	77.8039	5.7352	55.9991	96.964	29.1737	15.3517	8.2269	16.5463	10.4529	30.2267	0.196436	2.41508	0.847392	0.878467	3.42657	94.3067	2.12334	0.038351	25.031	0.133541	9.16689	1.50561	11.9744	42.2066	4.40204	70.3588	14.1738	45.7037	83.274	11.3172	77.0188
TCGA-25-1628	0.060269	0.0131499	22.1087	3.56249	0.00934483	21.0785	2.23603	3.97398	35.5335	34.84	31.7384	0.83824	143.268	64.3928	4.93655	0.0143627	45.2427	10.4477	75.3461	8.11916	41.1511	110.924	17.9375	14.1473	2.7487	18.5835	15.3024	40.0101	0.105701	3.48795	0.89577	1.31895	3.31383	82.3134	1.22963	0.0429375	25.6185	0.0755638	16.0402	1.02394	11.8222	39.2549	5.12894	59.0196	15.8963	74.1025	62.5769	10.918	50.8912
TCGA-23-1113	0.0556079	0.025233	24.1372	2.8501	0.00545976	22.8524	3.78844	1.97662	27.1847	119.416	20.8376	0.222302	294.397	89.6967	4.34633	0.0276645	98.5627	14.973	114.803	3.31086	115.304	56.5601	83.201	30.4739	5.04518	19.4597	9.4724	20.5026	0.136254	1.31298	0.767737	0.910673	4.36196	80.449	2.99388	0.0315013	20.293	0.163336	9.06835	0.960444	6.55368	21.5395	5.36725	135.735	17.8024	58.7386	49.1989	15.1754	121.991
TCGA-29-1777	0.069172	0.0110316	6.06127	6.28488	0.00441151	32.3389	72.0609	6.67696	32.1177	125.912	17.4554	0.391914	145.701	52.1646	7.68545	0.0131686	119.276	7.6102	144.955	6.92315	238.415	45.4274	154.751	24.4834	4.10142	9.54159	16.5118	24.0768	0.0547871	1.95964	0.566689	0.993259	1.73897	34.4535	0.607026	0.0100154	18.0671	0.0479031	24.3444	0.718681	5.91807	18.7172	12.1356	115.078	15.217	38.9067	113.517	21.5756	58.3363
TCGA-61-2101	0.380014	0.0984491	97.1562	15.9654	0.0261294	21.7102	14.303	5.6378	71.5516	146.606	20.2824	2.31627	181.406	73.9866	5.2981	0.067772	146.991	11.1792	80.373	27.6886	166.078	333.368	94.7004	18.7389	22.235	14.9003	13.5272	54.5431	0.186737	2.84276	0.831417	2.3506	4.62255	606.451	5.96376	0.225098	60.9414	0.0981331	28.1626	1.38226	49.4336	147.987	7.77251	122.513	19.574	53.1725	208.309	14.3499	132.868
TCGA-24-1930	0.0776873	0.0334762	21.6979	4.355	0.0101423	19.6555	5.78095	5.79518	38.5433	80.091	20.9716	0.639697	97.2336	50.1688	7.36937	0.0479968	77.0598	9.59283	70.7604	5.37125	25.059	108.146	46.5225	18.4743	7.64373	15.1436	9.54768	31.5112	0.128245	2.49943	0.730664	0.927756	4.95409	60.2917	5.36112	0.0363317	27.5832	0.0712765	10.743	3.11692	12.0744	23.031	6.58109	96.6796	23.6194	35.5959	90.215	13.4872	79.0171
TCGA-30-1853	0.874593	0.072611	190.17	24.1486	0.0130276	38.8049	13.6428	2.95842	33.4698	153.569	24.759	0.738315	241.17	127.076	7.49484	0.0426772	127.661	14.9345	103.292	6.86163	120.411	102.16	92.2122	36.4055	8.58157	18.002	7.67535	24.7698	0.120576	1.36905	0.843963	2.01875	3.5788	555.006	7.53277	0.0929896	30.2239	0.137634	11.4606	0.561714	69.2314	72.481	4.44987	78.6464	20.5641	79.1516	71.6284	18.4904	167.595
TCGA-09-1674	0.032417	0.0115612	9.3364	2.60811	0.00981711	21.927	2.22281	2.59777	73.4562	24.368	22.5488	1.07726	430.996	160.694	4.42954	0.0486142	105.689	18.1028	99.8504	3.13454	112.48	116.273	51.0307	13.8543	1.75861	13.808	20.4828	134.335	0.17473	5.52505	1.06304	3.28628	3.02785	144.772	16.3176	0.0760575	29.0326	0.112063	11.9374	0.277865	5.62343	32.0146	8.72812	43.7336	7.8879	84.6647	135.688	7.65957	53.4367
TCGA-04-1536	0.781223	0.521157	78.8392	36.4212	0.046782	24.0663	4.7541	7.29717	42.1853	238.96	19.6289	1.63156	369.03	89.6277	6.98341	0.224851	199.936	14.4902	110.589	18.2023	247.245	374.116	151.886	22.0767	28.8755	21.1922	30.216	166.618	1.02949	9.11047	0.894058	4.8742	11.5384	802.637	15.8175	1.02112	36.7291	0.354811	22.879	1.64439	108.848	145.617	23.2123	119.279	23.7718	63.5406	187.176	8.49019	232.686
TCGA-25-1633	0.0412245	0.0197576	14.3639	5.31331	0.0109645	23.1556	16.5716	4.77173	61.2952	45.198	35.5451	2.24373	185.606	82.2817	6.75766	0.0133475	64.3522	12.0827	84.4834	10.2386	23.4419	190.88	20.4134	20.0527	7.32838	20.2688	21.0458	37.5355	0.100546	3.72963	0.961144	0.829805	3.93309	160.468	0.623955	0.0657825	39.9933	0.155849	22.0149	1.58285	7.76751	43.3257	4.38887	83.1841	27.7454	83.6965	141.21	14.2956	62.2205
TCGA-13-1506	0.0578741	0.0249522	8.11426	5.49241	0.0128951	28.7448	24.0808	6.48073	49.6887	90.1552	20.9868	0.812691	315.63	88.8637	7.80034	0.0801698	53.231	17.117	139.141	4.90867	203.457	78.8126	99.4723	21.6218	6.13923	23.3433	35.3122	25.7897	0.184528	5.82278	0.824758	3.35762	2.4893	33.2922	8.27528	0.0486387	24.4211	0.103998	14.1508	1.02308	13.538	19.5765	13.1178	51.0031	12.117	80.2197	108.883	13.2776	112.234
TCGA-13-0905	0.0582666	0.380918	11.6364	24.7364	0.0281536	23.2967	2.30059	8.55545	39.229	83.9819	20.5787	1.38844	231.159	66.4048	9.17975	0.0757219	156.567	12.2883	125.161	23.13	160.333	135.732	66.9184	20.0273	15.9917	19.5064	18.1405	133.208	0.151755	2.61962	0.858996	7.53088	5.13348	115.826	4.82411	0.318788	38.0956	0.13759	27.703	2.12978	8.01071	71.5661	12.3605	95.7026	14.1657	60.3177	118.414	14.2902	96.6888
TCGA-25-2404	0.138653	0.0353759	38.0923	17.3787	0.0165273	31.5149	14.0818	6.43954	79.8553	79.9382	44.0801	3.65518	178.446	66.2155	6.95709	0.0563324	147.199	13.8792	89.6214	27.0674	130.415	203.6	143.104	21.6123	8.60619	26.3114	28.3065	63.282	0.247194	3.84508	0.848015	2.17812	5.20824	120.949	3.413	0.0964503	46.0827	0.164232	27.7214	2.22168	31.4432	58.9961	7.94457	103.376	50.4186	54.0931	136.882	13.4916	114.73
TCGA-24-2262	0.100715	0.0210001	26.0841	15.4572	0.00622246	18.2489	7.44997	8.00508	38.8606	115.085	21.1962	2.80273	168.8	58.6633	3.91256	0.0654655	153.094	9.7228	90.3895	18.2347	80.7163	102.575	76.3886	12.8296	7.59452	11.1537	11.5898	69.1454	0.186124	2.50691	0.823896	2.62321	8.71303	38.0037	4.75002	0.0371585	18.34	0.0950692	21.9947	1.50127	12.619	81.8412	14.0642	100.874	19.0844	39.9742	56.7447	8.61907	128.451
TCGA-29-1694	0.0607713	0.0246735	46.9434	8.53111	0.00939472	20.681	20.3833	7.89447	89.8427	114.967	23.5355	1.31584	180.67	67.6325	2.52785	0.0732935	104.065	14.7788	97.9481	13.6852	60.2139	112.504	149.601	21.3465	6.10122	18.5851	36.4091	31.3396	0.234007	3.45811	0.842254	0.637639	5.47652	99.7916	7.00655	0.0952387	26.0046	0.16292	27.012	2.45909	15.6004	53.4028	7.05613	94.3563	24.418	37.97	231.46	11.2476	97.4502
TCGA-24-1847	0.137671	0.0794487	47.7282	14.085	0.0492755	32.0393	6.51094	9.1004	79.101	129.889	27.5757	1.22405	159.805	49.5842	10.4746	0.0697399	88.6819	10.7856	76.203	16.0807	235.971	250.798	136.752	15.1783	26.6595	19.7975	31.8924	91.8115	0.384251	6.4642	0.840178	1.77021	6.85945	184.997	9.87129	0.381243	43.6039	0.286659	26.3814	3.07718	27.4573	77.672	8.40037	111.351	31.3662	44.602	239.798	11.223	157.607
TCGA-24-2290	0.118274	0.0277271	20.857	7.47504	0.0117479	15.2547	2.7387	3.30952	23.3635	72.3541	20.724	1.22327	179.336	66.6188	3.04752	0.080146	89.2549	13.4251	88.7177	6.54002	117.516	154.717	47.5602	14.722	7.4346	19.8297	28.8477	78.821	0.396518	5.59729	0.98036	0.982307	7.55379	177.448	10.3038	0.0528251	21.0599	0.149277	7.09192	1.74071	25.477	35.7422	9.43209	57.8448	23.9601	42.5523	100.456	8.06208	97.4112
TCGA-29-1763	0.0738038	0.0246961	25.6101	8.783	0.0139203	18.064	9.52746	6.33249	73.3332	59.9735	24.7926	2.40164	205.736	91.9466	9.15223	0.0816191	86.686	14.6863	95.3355	11.712	61.7293	146.003	50.2233	17.7622	6.02662	14.1692	31.5459	52.0199	0.119098	6.30814	0.881352	3.81442	3.03631	216.039	10.7388	0.092828	32.3613	0.103302	16.4849	1.54692	9.62355	50.0955	7.54301	67.0116	17.1329	50.78	115.286	15.5651	47.7363
TCGA-24-1544	0.158527	0.0369885	63.0778	11.5371	0.0128281	58.9006	2.14064	4.06687	75.8804	122.374	29.4783	2.1913	235.189	115.506	13.825	0.0954388	237.208	14.6509	95.3902	19.7695	179.318	208.142	40.1725	27.3611	13.3217	15.5844	15.2267	92.8882	0.149716	2.85375	0.807147	2.71812	5.2811	169.699	7.38483	0.0929252	60.9844	0.157495	29.4037	0.643569	30.4179	57.8614	5.21696	101.295	15.7713	62.5037	262.5	34.5525	124.589
TCGA-24-2026	0.208821	0.0280304	38.919	11.777	0.0110478	8.9981	9.96383	4.27464	52.8147	69.2648	28.989	1.50541	147.095	52.2894	3.55454	0.0513113	96.6058	11.6974	84.769	7.47659	258.413	113.444	35.5884	13.9817	5.41776	16.2464	16.4416	74.5444	0.321564	3.83339	0.747035	3.20374	4.19314	261.906	7.47505	0.0843936	22.7825	0.163794	19.5007	2.14807	21.4537	112.575	7.65482	58.2275	16.9887	45.309	138.481	6.1826	124.569
TCGA-23-1119	0.449663	0.0379326	65.2243	10.6344	0.0198039	54.4397	3.86715	2.50628	27.0055	196.808	22.8029	1.1701	113.34	88.318	15.0642	0.0743457	237.819	12.7365	100.267	6.9988	226.853	133.079	124.7	32.0646	22.2598	10.4586	53.1304	58.7633	0.611034	10.9764	0.643049	2.62223	5.42893	398.457	9.28426	0.220236	38.925	0.238741	10.4073	0.926269	38.812	89.6157	15.9996	221.315	20.3713	40.6826	114.163	19.9701	176.922
TCGA-61-2003	0.0985603	0.0160574	19.7404	5.11108	0.00909511	18.9253	4.89078	5.91718	43.1139	54.6902	18.248	1.27463	118.378	49.1125	6.42513	0.0234635	67.7185	8.25042	75.2763	10.4117	56.7149	199.124	31.7996	10.719	7.78425	12.4494	18.7866	46.0414	0.0940551	3.50956	0.804988	1.37236	3.65357	83.8983	2.774	0.0404761	30.068	0.0764875	18.431	1.94663	14.2634	56.6209	6.58347	88.4137	17.777	45.9506	69.7533	10.7087	45.057
TCGA-24-0982	0.156442	0.0140136	56.1839	3.18888	0.00586866	17.7392	3.03464	1.81316	11.6645	78.4085	16.7996	0.238335	121.789	110.985	5.60707	0.0314756	70.1622	14.418	98.9549	1.59243	70.2084	69.1676	35.142	22.9051	3.95649	14.9555	11.5625	19.0183	0.159366	3.39542	0.790257	1.29921	3.35638	68.9554	3.37709	0.0234378	14.0134	0.102023	7.06685	0.527297	14.1194	27.313	5.21278	78.5702	9.33038	65.0951	18.0507	13.3459	53.9723
TCGA-61-2088	0.0710122	0.00578619	59.9419	0.991576	0.00615779	21.7267	0.537907	3.73264	23.6424	24.5696	15.8325	2.07055	353.979	148.612	6.27288	0.0838719	36.5686	18.5435	66.9377	3.90091	85.8016	65.2097	38.2624	12.5954	1.83009	15.9117	18.491	40.1005	0.125607	2.56776	1.10929	1.39795	2.97532	83.7453	18.914	0.015441	19.4416	0.103565	8.90484	0.971359	7.02561	56.1229	8.08258	17.7887	11.0737	41.2573	69.5992	16.6894	20.7166
TCGA-61-1724	0.284727	0.0170408	103.066	17.4476	0.0112562	39.0047	23.3714	8.94717	41.5673	101.154	27.3479	2.3013	168.731	61.4628	16.5674	0.136427	114.326	11.7467	57.3932	9.72951	309.564	130.243	49.4597	15.7871	42.9298	20.5267	19.9434	102.947	0.600109	8.16035	0.860161	8.96642	6.21831	357.306	23.4203	0.0734508	59.9244	0.217595	35.1423	1.43534	51.6304	175.233	15.2473	49.0016	32.4525	75.2934	146.833	19.041	206.839
TCGA-20-0987	0.0485512	0.0215789	6.33434	6.86777	0.00429264	12.0076	10.0436	7.84357	34.6914	80.8379	14.5316	0.498427	121.115	29.3261	4.28143	0.0239146	50.5481	9.43378	91.4952	14.8594	134.862	107.234	52.4953	9.74628	6.27774	23.6644	10.5615	24.232	0.207623	1.92482	0.567458	0.88791	3.79497	14.2882	2.13255	0.0323228	19.5905	0.0797456	23.4377	8.28949	7.27947	34.1588	5.04436	81.2436	19.4437	18.7915	159.58	8.15226	59.232
TCGA-09-1667	0.0246159	0.00537486	7.15446	1.72771	0.00462308	16.4561	13.7966	5.19262	21.1297	44.7274	16.296	0.812198	115.191	66.5297	5.2815	0.0270115	63.1004	13.4531	103.473	3.37404	99.218	77.5687	33.1995	18.1385	2.27053	14.6663	23.4292	30.7756	0.1828	5.02922	0.802448	1.1301	2.08974	29.497	3.63799	0.0209163	12.3111	0.0617146	10.3084	1.29439	3.44431	30.6652	9.09838	45.1872	12.1151	42.0526	90.0002	9.2731	30.7774
TCGA-61-2000	0.0561245	0.0277668	40.8176	4.5951	0.0163984	21.9645	10.6689	5.11254	42.5479	96.8963	5.57103	0.922283	192.561	22.0733	5.22294	0.0738374	110.647	6.22346	85.0048	5.18657	177.332	107.581	147.166	8.29281	4.71159	10.9167	21.3668	20.0551	0.541548	4.61347	0.80507	0.988843	2.5775	54.3798	10.5934	0.110198	16.2733	0.107846	13.1344	0.570958	9.2669	30.3101	10.7471	99.0528	1.85025	41.4668	95.911	11.4969	69.5968
TCGA-25-2401	0.0822721	0.0287088	19.1271	8.15444	0.0155622	34.968	12.9158	7.5714	40.7033	77.8229	18.7385	1.01305	137.724	42.6559	10.1493	0.0230326	53.3556	8.36683	89.969	12.6646	79.8174	147.039	66.308	13.7876	4.37526	14.829	31.4818	38.2009	0.188579	6.56128	0.733741	0.823127	3.07752	73.1704	2.35451	0.0949573	25.0367	0.10527	17.2739	1.85212	13.5294	42.2479	8.79999	82.3599	16.0339	33.9882	108.33	15.9163	69.3345
TCGA-29-2425	0.150484	0.00843386	43.1776	1.6242	0.00579221	21.7793	37.4115	3.65886	25.3456	49.6941	20.9975	1.03027	176.274	119.84	4.24317	0.0308503	73.0561	14.6054	97.1634	3.72695	147.27	60.8778	37.8862	29.6964	2.4045	16.5809	8.02075	15.0027	0.105942	1.66995	0.820919	0.846113	1.92804	325.402	3.73509	0.021059	33.2825	0.100497	8.48873	0.447439	16.7903	38.9789	4.22403	43.9181	16.3915	56.7448	117.813	15.013	43.12
TCGA-04-1651	0.0663948	0.0262897	23.445	4.04877	0.00647514	22.7941	2.10854	3.63791	29.1714	102.016	22.9665	0.848639	322.965	108.85	5.47362	0.113467	119.514	20.4355	113.273	7.49136	109.103	76.9149	150.97	23.0749	9.58959	20.712	17.4174	71.7638	0.255704	3.27187	0.931921	1.50203	8.26318	165.165	17.0132	0.0912884	21.7803	0.159403	14.0222	2.09877	8.50567	49.2312	8.26058	70.7548	29.7916	48.4357	125.582	13.8259	101.296
TCGA-30-1891	0.142704	0.0355918	30.1129	16.7323	0.0162192	62.9678	115.448	16.2594	69.467	114.871	25.9635	1.49015	165.954	52.7916	9.27844	0.0243814	120.137	9.80783	106.615	17.562	178.519	151.5	136.263	26.0838	6.89194	12.8716	35.2835	46.3362	0.206069	4.85248	0.692115	0.915518	1.80861	71.3567	0.892153	0.107176	29.0095	0.250003	34.594	1.17195	36.6828	34.2603	10.7716	132.649	21.6095	54.5294	271.679	25.6683	89.7298
TCGA-57-1586	0.0689883	0.0099702	11.4577	3.0219	0.00565565	14.1739	27.1388	4.62819	37.3724	59.0315	18.6176	1.04988	148.718	98.7731	2.87892	0.0768865	65.985	19.2261	81.8141	4.37285	32.1971	90.1027	43.9578	15.8761	6.85954	23.2683	11.8026	28.9452	0.207281	4.21177	0.876865	1.80636	4.04741	54.6444	29.2653	0.0132718	15.4856	0.0586381	8.13866	1.90872	6.22795	23.0417	11.5373	49.5362	19.7972	47.3174	52.5059	10.6358	40.1711
TCGA-25-2397	0.25538	0.0407199	85.7944	13.1907	0.0125296	35.4465	6.50338	8.14362	28.3755	103.459	23.2308	1.28016	188.953	71.9633	8.39952	0.0410909	110.283	14.2297	129.054	11.0811	275.87	191.672	96.7067	19.6311	9.3443	12.8391	17.9741	58.5496	0.203808	4.20195	0.781194	1.90677	3.11596	168.444	3.7621	0.0862556	28.0628	0.0889627	17.5374	1.42593	47.5586	91.7978	10.1901	81.9639	21.6629	43.2078	168.843	15.8669	130.753
TCGA-24-2281	0.0469299	0.0234236	16.4128	3.0503	0.0113839	24.5925	2.31913	2.76268	28.676	53.0177	18.0388	0.673529	174.363	78.9643	5.41719	0.0554087	65.5301	14.1694	90.5053	4.01384	101.462	78.8265	39.2179	17.657	4.8373	17.1075	22.2865	26.6593	0.329999	4.24799	0.862241	1.65454	4.59842	87.2279	7.66899	0.0587378	20.6071	0.139936	7.74022	1.63887	7.28665	24.9507	7.97573	85.975	18.9706	36.2168	57.5624	12.9914	52.0603
TCGA-24-1551	0.040964	0.0127315	16.8501	2.42823	0.00403132	9.92544	0.355165	2.99419	19.2897	47.7759	11.9191	0.545398	101.357	48.6682	2.51171	0.0385561	36.3773	10.1567	104.507	3.26473	69.9757	71.2211	28.3784	8.38476	2.13678	7.38891	14.5546	57.824	0.15328	3.25397	0.846924	1.32436	8.82905	68.1391	8.3318	0.0247804	7.31514	0.110213	5.8145	1.04894	4.40411	22.4898	4.85953	55.204	9.84026	32.3307	84.4254	5.84422	65.3407
TCGA-25-1316	0.0390455	0.0214559	6.96711	2.02488	0.00814561	42.2433	26.2383	6.00248	62.2335	21.8784	13.662	1.88082	215.58	130.317	5.881	0.0235892	70.9812	15.1162	93.6088	7.83671	24.6856	135.956	66.4198	20.6915	2.76056	14.2664	15.1341	23.644	0.0538161	2.13557	0.930688	1.28332	2.47973	127.86	20.6747	0.0322228	27.2219	0.0564085	21.6628	0.792861	6.8951	19.1755	5.63593	81.3849	11.2418	66.3966	59.2256	18.8533	19.2826
TCGA-25-2400	0.313246	0.0326777	35.3642	8.3954	0.0268137	26.651	19.6636	6.27896	75.7834	78.8024	9.81721	2.29414	208.74	59.3921	9.07919	0.251203	55.6249	11.2729	90.5389	8.32247	311.437	127.834	48.8424	11.3683	20.7542	8.64958	22.1088	76.7056	0.73058	16.3314	0.818892	5.00887	3.61103	634.282	23.4289	0.0733684	56.4353	0.249318	14.0118	1.07608	41.5352	57.9876	15.7241	133.73	4.86009	31.2672	377.011	11.207	203.019
TCGA-29-1778	0.199992	0.0121627	73.7108	3.64901	0.00802669	15.394	5.78839	2.84769	15.7159	45.0738	19.5058	0.920688	84.0285	75.4105	3.68047	0.0559453	34.8484	11.1376	70.2078	3.66467	62.0427	49.763	37.1492	15.6631	3.35781	13.2587	13.4545	29.2611	0.177844	3.45576	0.669704	1.75037	2.17975	134.065	1.1414	0.0522357	21.3464	0.0906948	8.42005	0.838395	18.2717	40.3022	7.60424	47.0192	10.9267	36.2704	54.3316	6.08561	85.0947
TCGA-13-0899	0.0499941	0.00997082	7.52989	8.54896	0.00842621	26.0325	38.2717	7.63726	83.5884	59.6067	17.0378	1.01671	374.832	126.163	3.58503	0.0430844	61.7472	17.9064	118.071	10.1234	107.576	64.4584	117.626	23.6446	4.09203	23.092	22.2364	9.63984	0.225373	3.37591	0.7783	1.70818	2.52112	48.7272	1.78722	0.0590594	38.1405	0.164139	25.8427	1.52148	5.82585	16.06	10.4585	142.892	12.2772	41.3156	152.491	12.232	50.0941
TCGA-24-1548	0.0367842	0.00650661	17.2102	1.64102	0.0050993	28.0573	1.52009	2.37862	28.0931	37.8102	22.9402	1.33033	248.554	81.2793	5.02965	0.0518757	19.5252	13.7872	88.1549	2.25634	144.834	74.8944	35.2625	16.1092	2.95418	13.503	13.166	33.7315	0.110609	3.18067	1.11002	1.61042	2.82149	103.41	7.35342	0.0134232	19.6062	0.0643012	7.16394	0.79241	6.73753	31.2173	9.13576	29.3627	10.6327	71.1412	52.1582	11.1846	72.4326
TCGA-59-2355	0.113927	0.0356184	22.5871	8.91893	0.013001	18.1434	19.9789	6.20241	67.9663	86.2082	22.7521	1.73242	147.548	90.6241	4.35508	0.0729845	118.704	15.2629	102.424	10.5325	65.4439	109.671	94.2011	24.3562	13.0041	20.2918	39.7047	37.2544	0.224461	6.59516	0.827596	1.51139	3.96269	179.148	6.34547	0.0548302	34.2861	0.141373	20.6192	1.57121	15.6466	38.2659	9.98548	143.338	25.0577	49.0572	101.832	8.93716	79.6292
TCGA-57-1994	0.177504	0.0303581	48.0589	7.21968	0.021231	20.5247	8.57509	7.72782	57.1236	74.589	31.2252	3.1066	155.114	74.7074	5.54349	0.0630127	108.145	13.0578	68.2393	11.2873	165.026	168.24	44.1061	15.446	7.02621	18.3323	24.7099	69.8359	0.405955	5.77548	0.950002	1.20165	5.03539	244.5	9.10949	0.0955722	38.2113	0.165284	22.8978	1.60012	27.7967	64.8027	8.1594	79.147	19.4884	53.8574	112.435	14.4978	85.9433
TCGA-24-1434	0.0708818	0.0176441	21.6906	7.93571	0.00971567	21.5329	6.09433	4.43148	55.8552	55.826	28.305	1.35103	100.479	39.1549	5.71118	0.0136586	63.6402	7.01765	65.4678	12.8318	68.5441	193.995	32.3905	13.8201	4.6321	12.3492	20.6723	55.6587	0.169225	3.58887	0.729732	1.53911	3.82916	117.4	0.879785	0.0541216	24.3251	0.151575	23.4774	0.872118	19.6846	48.4397	4.81837	106.719	20.4923	66.2926	128.327	11.3315	72.2528
TCGA-09-1666	0.070788	0.0378899	28.2493	17.5186	0.0179544	45.5589	11.692	9.56844	49.1087	87.0324	26.3149	1.69346	183.947	80.3428	14.3919	0.0841653	140.796	13.4186	109.677	10.1537	160.536	185.932	125.749	22.2461	6.68208	14.4607	73.6206	67.1671	0.340447	11.5015	0.883646	1.46723	3.61506	129.148	12.9709	0.132575	29.0456	0.124206	21.1345	1.42712	15.2877	61.2396	12.7733	82.5596	17.0877	52.4098	110.503	17.4981	86.4369
TCGA-30-1860	0.0107358	0.013029	2.4375	1.23003	0.00546174	21.4361	5.61682	6.27539	41.0482	55.9155	25.735	0.67714	208.588	61.525	5.02007	0.0463952	103.185	15.3417	137.464	6.94358	65.2105	71.8831	58.3962	19.4509	3.6301	18.1964	21.7078	29.9541	0.156372	4.23305	0.699947	1.02498	3.72251	9.91965	4.44624	0.0439682	10.5535	0.052707	14.6608	3.35216	1.6968	9.77685	11.4382	59.7799	18.0436	28.8781	203.1	9.57726	43.5775
TCGA-24-1562	0.0617676	0.0171126	16.1855	4.40988	0.00582399	22.1267	8.66265	4.59336	29.7131	80.5805	25.5772	0.84438	173.106	78.2473	6.22891	0.0267718	72.8407	13.4723	110.478	7.25077	54.3395	91.2463	34.8273	22.125	8.10369	17.7609	13.5196	25.8566	0.107451	2.13476	0.883677	0.842774	4.71012	104.113	3.18294	0.0287835	17.3734	0.128331	12.1665	1.13822	8.33175	31.8042	3.79941	95.9233	28.5165	60.8199	63.1788	14.4354	69.5317
TCGA-29-1697	0.0344249	0.00974489	19.8677	6.57478	0.00813204	28.9844	12.0711	9.77501	45.8178	48.7174	12.9504	1.30747	295.133	59.7009	4.3552	0.0830592	59.0906	12.2879	92.9522	4.75158	369.814	177.835	111.01	11.1384	4.73915	9.97996	25.5866	56.1312	0.202916	7.01027	0.953358	3.33891	5.05325	88.3951	26.2054	0.0380975	33.002	0.0747738	21.5538	0.338388	5.14998	21.9297	19.2394	31.973	6.6753	51.3359	303.072	11.5847	60.9013
TCGA-13-1498	0.155883	0.059745	60.8366	8.33505	0.00955576	37.9696	2.5811	4.86433	49.3401	123.36	30.5749	1.31407	124.094	115.491	13.0733	0.0872114	187.446	20.4384	142.552	8.1007	236.677	131.902	114.8	28.8741	11.3324	16.315	36.7407	96.7983	0.773586	6.85945	0.796138	3.1544	2.97246	332.463	10.2288	0.203904	18.4603	0.223549	12.9247	1.75544	16.9518	99.5822	11.768	128.216	23.7746	47.1773	72.7659	17.2086	103.207
TCGA-09-1670	0.068323	0.0243881	25.718	5.75567	0.0100608	25.3419	2.34886	3.27458	20.8195	84.3159	17.8879	1.19337	139.828	93.5594	4.93375	0.0507453	67.2897	14.8599	100.669	5.57303	72.9799	132.03	58.5325	23.3638	7.31131	11.8206	12.8418	39.6363	0.150005	3.81498	0.868522	1.62605	3.31376	181.057	11.2296	0.0383021	39.0159	0.0805457	7.03661	1.04421	11.2814	40.9367	8.14437	63.5998	18.3996	58.1817	69.3478	14.1627	73.1644
TCGA-10-0936	0.064762	0.0223662	23.4342	10.5696	0.0111643	18.7347	6.2049	2.87451	20.2475	90.2513	17.2117	0.604335	330.376	130.052	3.77373	0.08327	61.0583	27.5063	123.384	4.74089	113.929	62.2346	100.524	29.1529	9.269	46.5742	18.0794	11.1402	0.180726	3.65285	0.845955	2.3161	3.48088	24.9567	6.03336	0.0489331	25.0326	0.0960057	8.79294	4.68356	9.01324	23.2835	10.0291	33.5174	26.7185	46.1331	35.2457	21.5626	60.4394
TCGA-61-1918	0.0829536	0.0171662	28.9847	4.9019	0.00834452	19.5311	11.6244	5.87493	35.0093	75.2617	16.216	1.17598	174.107	63.8546	6.72828	0.0731914	57.5719	12.8434	81.2274	6.25668	102.871	96.5692	40.95	16.5272	9.57775	14.9208	16.1379	32.2741	0.215752	4.36284	0.891672	1.50212	3.7782	94.5282	9.32368	0.0339028	25.8945	0.0945672	12.1386	1.73409	11.8701	37.6961	6.33124	45.4194	14.7004	47.6258	66.5095	13.1954	67.3188
TCGA-04-1338	0.109575	0.0627125	31.6976	2.92707	0.0121077	28.1612	1.20017	1.45755	16.5188	115.226	37.4257	0.393216	141.39	103.755	7.12093	0.0400384	136.822	14.074	84.1749	3.74729	34.4605	81.3363	43.2676	34.5461	5.22343	21.2589	17.555	64.9067	0.332108	4.84824	0.859806	0.940852	4.63633	172.26	2.72106	0.221899	15.8131	0.246293	10.1303	1.5018	11.9749	54.9278	6.38315	189.523	35.2803	81.0429	30.2487	11.2626	76.2601
TCGA-OY-A56P	0.0610291	0.00572364	13.1852	4.49358	0.0107379	27.1535	4.28179	3.43392	60.5735	31.3897	17.1114	2.39829	214.344	119.273	8.86128	0.0287513	13.8729	14.4208	74.3744	3.25714	68.6678	126.65	16.5061	11.9665	1.09941	10.3205	21.1669	26.1224	0.133022	4.55995	1.04317	1.93786	2.03969	229.313	19.1318	0.0322652	18.8439	0.118377	11.9934	0.197168	9.02561	37.5086	5.26478	48.4976	5.52235	86.4841	62.3605	11.0304	39.0887
TCGA-24-1467	0.123986	0.0133539	49.9644	2.21672	0.0126366	16.0597	5.73883	1.89224	23.6785	58.0487	24.1336	0.731606	172.088	133.596	2.8848	0.0750534	35.0791	18.7264	74.7775	3.03626	61.8984	82.8327	43.7848	24.6015	6.58701	20.528	41.0398	20.3494	0.47249	9.04826	1.05076	0.861282	3.87301	192.892	28.5384	0.0538103	19.4894	0.160684	5.75458	0.77587	13.8416	27.2124	7.26424	37.1115	25.7047	62.5434	57.7722	11.3643	39.9606
TCGA-13-0726	0.246418	0.038177	76.8568	11.7457	0.0203609	45.8667	37.8886	10.5781	96.328	150.747	23.8271	1.29106	258.647	92.6061	9.20638	0.0593578	203.584	20.5189	134.439	19.4063	319.317	233.254	220.086	31.6181	28.8114	22.6189	87.5	22.467	0.452197	17.9319	0.769256	1.95923	3.91303	45.4689	6.16881	0.383172	66.1105	0.395087	54.9321	2.64316	26.6772	111.008	11.455	157.532	31.9201	47.7924	233.173	14.5382	90.8707
TCGA-24-2027	0.130625	0.0702265	22.8197	7.58879	0.0426495	14.9707	6.67174	4.22217	76.9787	88.9033	28.2263	5.06828	492.98	123.27	3.95705	0.0632524	93.7068	19.1432	139.867	33.2229	385.737	351.77	116.957	24.1828	21.13	18.7174	53.2034	100.767	0.306545	8.63326	1.18257	2.3761	7.2862	268.157	4.67788	0.284687	75.9521	0.123034	23.4683	0.601477	18.0384	55.0625	8.37779	79.178	17.3108	61.6893	255.962	9.75683	179.809
TCGA-24-2288	0.0973834	0.0386669	33.8816	6.40622	0.0198689	33.1994	4.19877	5.28775	39.1361	70.0673	30.5557	1.33932	118.884	69.6576	12.223	0.0716068	108.343	12.2426	87.1933	6.27132	84.3134	210.616	52.2444	21.2378	7.3991	16.7213	19.8121	80.6464	0.252292	5.33093	0.805069	1.71427	4.3211	173.41	4.01546	0.130284	29.5368	0.10918	19.0416	2.22784	21.7835	41.0959	9.99557	68.3287	23.339	52.5018	59.7583	17.7106	72.7573
TCGA-20-0991	0.0448258	0.00457184	1.72178	3.21632	0.00344258	23.7575	13.2365	6.2104	32.2651	29.6351	12.77	0.298918	119.733	36.8932	7.85787	0.0168916	35.0449	11.3646	92.9037	6.64656	83.0229	72.2742	26.4796	15.8956	2.54011	25.5969	9.11382	7.98344	0.122344	2.6065	0.539834	0.911189	2.29026	1.85504	1.40412	0.0104902	18.9108	0.0638184	13.4885	9.34493	4.06751	7.86263	3.14708	119.799	14.6497	18.9782	124.041	12.1235	25.3333
TCGA-29-1761	0.168372	0.00751482	9.11868	12.089	0.00367973	33.7997	9.40035	3.81999	17.1316	117.731	17.239	0.656664	161.091	80.8323	8.58595	0.106083	90.9964	13.01	113.747	3.29261	194.695	74.1026	56.8055	46.5448	2.43683	15.9957	24.5999	27.3313	0.103085	2.89069	0.617926	2.29593	3.78155	46.8139	1.03625	0.0113393	10.1522	0.224748	11.4335	0.993888	18.227	13.0075	6.33493	122.058	14.9148	52.3741	100.286	18.1199	87.6075
TCGA-61-2008	0.0756533	0.0459244	30.6994	6.908	0.0127943	24.2659	20.1306	4.54671	39.351	70.5383	20.7135	1.24071	196.654	91.3871	6.0407	0.0247873	93.2308	14.8185	101.829	8.15029	130.981	153.558	56.8959	20.9248	10.6593	19.2591	14.1941	43.3794	0.148019	2.41383	0.791793	1.63388	5.8338	128.137	3.52908	0.0424725	21.2282	0.0934627	10.8644	1.4616	13.0415	36.779	8.26454	74.8761	26.0959	44.7191	100.382	18.4292	88.9903
TCGA-25-1323	0.064581	0.0158831	19.3704	1.70405	0.0058536	15.5701	1.50734	2.28036	24.3045	69.9429	23.7966	0.428136	200.851	100.222	5.04318	0.0217764	65.8175	13.2595	92.8297	3.65516	63.9139	73.4741	25.9865	18.2666	5.63936	18.6233	6.77824	48.2435	0.159644	1.29964	0.893914	1.16094	3.53637	63.3389	1.28168	0.0219273	18.8058	0.0576923	6.83659	0.872798	7.52424	32.3208	4.37707	94.2744	16.5458	65.8507	33.9202	12.3345	68.057
TCGA-04-1362	0.147275	0.0529614	77.3638	6.11379	0.0179509	37.1117	5.18328	7.05594	58.3069	79.167	32.4414	2.3495	222.896	102.558	5.82873	0.0742814	115.433	14.3058	89.217	8.79582	229.515	114.878	91.3738	23.471	12.272	20.9334	53.6395	71.7727	0.438566	7.83622	1.04824	3.16441	7.05589	236.151	11.2122	0.0756025	27.8749	0.368827	14.9616	1.4762	18.9713	86.2739	13.3369	68.4378	33.4017	51.4684	148.701	14.2704	109.787
TCGA-61-2012	0.21262	0.054128	48.9721	19.2624	0.026658	33.622	10.2849	12.1504	103.697	147.489	23.2764	3.50279	121.967	45.0875	11.1981	0.143411	164.55	10.9745	86.7786	18.7262	313.991	191.236	79.1023	16.259	23.7225	11.2859	36.1435	112.571	0.210754	5.43951	0.686219	6.83243	5.61601	155.98	12.5653	0.250561	48.0241	0.216928	36.2099	2.50682	40.8488	107.198	11.978	108.839	13.8365	38.8919	654.07	11.9958	270.822
TCGA-09-0366	0.0323246	0.00842021	14.5523	5.63405	0.00658613	21.5223	17.15	7.28533	72.6238	67.8631	16.9174	0.576054	107.302	49.9067	3.81376	0.0517205	63.2839	11.6262	69.3221	9.50655	238.783	81.9577	89.2125	12.5167	3.22008	21.2419	30.7552	27.0959	0.239001	4.29911	0.739504	0.528633	4.28086	11.5295	6.14047	0.0349956	15.6548	0.180894	19.3044	4.93741	5.82358	37.334	7.56079	73.9483	22.6258	24.6284	164.933	9.8562	37.2204
TCGA-09-0369	0.0457326	0.00313271	5.61941	1.75586	0.00328783	13.7027	9.30792	2.29573	21.5844	32.3736	20.2853	0.819868	332.273	113.766	7.09819	0.0245913	46.4809	14.189	133.424	8.15319	43.6243	51.1208	20.4037	17.6967	1.75298	15.71	13.9862	7.31467	0.0785381	3.3989	0.723183	0.735694	3.73986	23.9244	3.67815	0.0179071	22.4934	0.0284584	7.53731	0.76076	5.44689	29.7339	4.15652	47.1637	12.1364	31.3694	160.929	13.1309	46.8163
TCGA-29-1784	0.109004	0.0311089	16.9848	7.44809	0.0125584	27.2747	8.13809	5.08324	32.9355	85.5937	17.9152	0.798736	160.957	56.8907	7.21378	0.104072	121.373	13.934	86.9716	6.58549	198.239	111.053	54.2237	20.2113	16.944	17.1836	17.1634	41.738	0.300466	5.46711	0.629915	3.79129	4.48362	63.5581	12.5915	0.062437	47.8034	0.0768132	8.65678	2.75025	19.8443	27.2549	9.71338	54.5377	23.0985	31.68	265.942	10.4577	147.681
TCGA-59-2348	0.277035	0.671708	103.52	50.009	0.142115	35.6286	7.50826	9.44647	90.0837	208.446	45.181	5.56304	388.972	120.366	11.0366	0.182436	270.986	20.4372	104.696	31.2937	254.891	336.066	136.528	27.527	38.0444	23.3126	64.3541	182.888	0.780481	15.9951	1.06899	2.36917	9.64042	1605.12	21.5187	2.10144	91.5513	0.306289	43.2998	3.61247	58.4752	308.833	21.4175	148.749	42.3189	71.8155	384.961	14.6428	203.758
TCGA-04-1517	0.335571	0.313051	180.575	26.7612	0.0462397	43.7473	3.14585	5.66736	45.1609	181.422	32.6386	1.33009	244.652	139.21	15.8953	0.181667	259.559	16.5537	91.2093	10.6084	349.681	227.33	89.5628	24.8327	22.3279	17.9386	19.9807	239.689	0.426387	6.44609	0.935495	4.27158	7.71662	815.227	14.16	0.429723	40.0123	0.169922	16.8643	1.31923	45.5147	134.698	12.3798	138.654	32.6988	81.0255	64.0714	20.7332	166.166
TCGA-13-0800	0.0391032	0.00546549	6.61873	1.3258	0.0052387	17.0321	4.45742	1.89889	24.3703	33.3489	28.552	0.845748	192.972	188.747	3.61078	0.0459967	35.8667	21.2966	95.9796	2.27039	21.2645	42.911	25.7861	28.8575	0.725316	29.1289	9.87439	13.7263	0.083518	2.07019	0.823916	1.90075	2.28334	52.2451	7.86392	0.0177962	14.0272	0.0549424	4.72648	0.929577	4.003	19.3998	8.18185	44.1539	14.0905	67.1739	31.1727	10.0057	19.3456
TCGA-29-1695	0.07981	0.0075693	5.1892	1.29198	0.00496568	11.5939	5.55821	5.08836	25.1584	28.4976	16.8349	1.17895	120.872	41.2871	3.11619	0.0185879	44.9907	6.96222	64.2153	6.13386	63.1339	126.66	21.28	7.85909	2.39868	9.29874	8.30297	20.6414	0.0856701	2.28366	0.758416	1.1	3.4444	78.43	1.50479	0.0121661	9.29986	0.0316615	13.7848	0.851431	9.16759	30.2957	8.31556	83.847	11.6823	32.0286	117.245	6.77624	34.9036
TCGA-13-0730	0.0405698	0.0121282	11.4889	3.26763	0.00951713	44.788	0.974383	2.78021	38.1589	29.9005	33.7114	0.958907	294.034	156.115	13.7539	0.0568331	69.1747	19.7784	117.975	4.23055	159.652	102.627	35.0781	35.4636	1.8975	25.0051	14.7049	64.4175	0.108708	2.54812	0.888707	3.03868	2.99087	103.137	11.0815	0.0376977	23.3003	0.0391866	9.12853	1.19451	7.76164	27.4224	5.4873	78.536	26.2796	61.2389	88.8014	23.7956	42.5277
TCGA-13-1405	0.0520048	0.0214172	19.1128	5.4728	0.00907964	21.7461	8.14078	5.98895	52.8655	80.8057	32.4835	0.649028	202.562	51.1654	4.49703	0.0223332	70.3248	11.2963	94.8844	11.0467	196.041	144.156	55.2947	13.0683	7.02755	16.8485	17.4593	69.1638	0.0870823	1.84928	0.796452	2.00109	4.66057	64.3935	1.70988	0.065366	23.2337	0.0920764	25.6158	2.07268	9.4753	77.7694	6.15111	96.814	22.6369	52.7957	68.7758	9.03035	76.3866
TCGA-09-2045	0.0823732	0.04499	35.6035	12.0265	0.0138739	17.824	2.43679	3.18758	62.0531	82.674	31.529	1.18759	185.506	120.145	4.78982	0.132528	97.3757	21.7657	88.7348	9.50179	100.785	109.396	74.1298	19.3599	10.0894	29.0622	30.8609	57.0771	0.495313	4.82047	1.0356	0.816812	9.64235	281.064	26.4461	0.137613	19.9226	0.0965479	14.2171	3.40741	9.50537	68.059	9.86397	114.771	47.9108	37.7688	67.2311	8.71381	101.023
TCGA-24-1549	0.0528431	0.0309043	26.5391	3.18725	0.0216546	38.7477	21.4576	10.5589	172.762	55.2526	29.196	2.38357	312.376	62.8916	7.90326	0.0411458	100.503	16.654	135.736	13.207	293.945	140.589	176.575	16.9291	11.2916	22.9631	103.04	39.9412	0.427526	12.0991	1.08577	1.28888	4.45984	150.398	7.32141	0.223851	26.2379	0.253822	42.5259	1.78013	9.57312	106.382	13.8342	124.475	16.105	57.7239	383.907	12.056	83.9852
TCGA-13-0901	0.131578	0.0189032	26.0751	4.66108	0.00964924	68.3904	5.35345	2.95476	33.9788	168.875	38.6241	0.447671	170.047	113.511	8.16354	0.0447915	137.862	13.0705	142.675	5.27934	208.706	70.0913	121.793	51.5275	5.15853	14.049	32.4762	59.3077	0.248954	5.00896	0.700089	1.9536	2.2011	179.663	2.41914	0.102367	22.7068	0.175383	14.9257	0.573132	18.6358	44.022	9.16167	113.573	16.4093	84.2549	95.4705	19.1069	64.0306
TCGA-24-1567	0.227314	0.0150818	73.633	7.00473	0.0109272	25.5662	9.22411	6.08825	111.978	54.2009	24.2782	5.64748	417.366	107.513	2.84339	0.0462363	79.8421	13.2321	88.2853	21.625	188.407	151.941	34.3071	20.6439	9.36707	16.4325	45.2954	42.0538	0.310208	7.432	1.09465	1.46964	4.83208	223.256	14.9546	0.0665901	50.9993	0.117212	19.4761	0.716732	28.6467	44.9352	10.9133	94.4496	14.159	44.8629	308.603	20.4461	79.2607
TCGA-23-2084	0.0346728	0.0253204	10.8091	4.27758	0.0093855	27.1126	5.85321	4.54055	28.0274	52.4831	29.0038	1.39776	251.076	67.5977	7.10388	0.0439122	49.8956	14.5995	118.265	8.18917	92.4777	152.187	43.3722	16.7894	10.3698	21.1408	40.0162	39.613	0.166416	6.57293	0.957328	1.67699	4.84058	47.6786	3.85581	0.0334219	23.9224	0.106275	13.8532	1.4782	7.05179	34.1928	10.9334	42.4811	29.0623	60.5966	97.2585	13.6891	76.5643
TCGA-10-0928	0.234599	0.0527953	58.3372	6.43118	0.0122145	41.4938	8.55035	4.61226	44.8684	95.6184	23.9667	1.19724	216.552	115.181	9.43458	0.110513	95.5743	15.2967	117.722	4.63433	74.4835	96.4734	92.2498	28.2765	6.70618	15.3898	32.5273	45.2903	0.299579	9.11116	0.963838	2.55113	4.14379	632.382	11.9607	0.0648307	28.7916	0.306833	10.3238	0.588942	26.8368	40.042	12.1149	80.4603	20.4221	58.5235	149.386	17.6557	108.898
TCGA-25-1877	0.0255595	0.000955008	0.838618	0.0406664	0.000833019	12.7666	14.8874	0.845967	4.75461	12.88	23.1435	0.13065	112.331	106.906	2.43007	0.00608013	42.8516	10.6969	154.153	1.15687	27.883	24.2583	27.1135	34.5842	0.655236	17.7721	2.91067	5.35931	0.0102449	0.42905	0.590277	0.76287	1.06103	2.40459	0.204619	0.000981455	10.9016	0.00358319	4.01387	0.162834	1.73381	6.00399	5.37951	23.4649	11.2048	41.6788	15.1867	9.36517	10.4152
TCGA-61-1737	0.0431227	0.0122714	5.29745	2.94564	0.0048641	13.4254	5.49581	4.66387	19.7865	33.3533	20.5133	1.30346	136.063	41.9417	3.93962	0.0152479	63.0066	7.45554	95.2954	7.36636	56.1095	86.0066	28.6455	11.475	2.19426	9.01976	22.7651	36.2181	0.152961	4.23605	0.694296	2.31494	3.29833	41.6087	0.785912	0.017936	11.175	0.0540001	11.5027	0.560401	6.71822	30.5021	14.1588	50.0971	11.9454	35.9263	59.7602	5.58478	47.7034
TCGA-24-1463	0.118583	0.0426421	31.3456	7.57918	0.0248094	32.4626	3.81666	10.3956	78.3307	60.3477	17.8831	1.43963	162.536	44.1585	7.84355	0.0440867	118.706	8.71567	73.4396	11.8183	237.359	281.321	118.493	10.5011	18.1325	10.4822	56.3747	81.3022	0.306903	8.0299	0.958438	2.06892	5.69777	172.219	10.9448	0.167385	40.626	0.276992	29.8383	0.783843	23.7568	75.2755	13.4931	110.603	13.715	47.395	183.975	15.4923	62.792
TCGA-13-0797	0.119772	0.0184053	54.0205	10.898	0.00922511	29.9743	2.29198	6.30169	17.3852	94.9505	13.9391	0.689373	265.673	69.6203	11.7521	0.0745519	97.208	15.9368	128.602	8.80773	279.602	173.522	114.924	13.3545	10.0213	15.3255	30.1172	89.7911	0.89381	8.82314	0.88782	2.69206	7.01023	82.1392	16.1595	0.128234	23.856	0.226793	15.0025	1.42143	16.3537	67.7351	10.0561	33.8059	15.1952	37.2618	107.912	10.2079	126.129
TCGA-13-0908	0.353934	0.157719	206.763	24.9218	0.0315771	30.4389	5.74621	6.36537	58.1625	124.268	29.1036	1.10811	150.81	76.6663	8.59693	0.0829954	128.879	12.2958	89.4219	19.5947	68.0488	260.189	68.9508	20.3842	25.3332	16.1864	59.6319	81.9944	0.761395	11.1882	0.959036	2.62635	6.1054	300.508	3.93769	0.474265	41.1495	0.296898	18.2558	2.13619	76.8474	190.503	10.3858	77.426	37.2182	41.6893	146.324	18.0769	163.043
TCGA-24-1603	0.198271	0.176571	85.8671	21.9963	0.0462725	32.3475	4.65801	8.2564	46.9467	123.801	22.0259	4.22672	271.169	80.0752	9.28181	0.226069	181.293	14.3898	120.315	16.6176	407.895	299.885	74.9793	17.297	19.373	11.313	46.4164	165.019	0.286441	10.2609	0.93963	2.69176	6.38996	320.728	26.8018	0.354917	50.4921	0.198102	18.6948	1.21393	31.7403	112.685	16.6414	49.3119	14.9419	76.7904	131.474	11.7121	126.31
TCGA-25-1630	0.0343956	0.0125504	8.45985	2.21748	0.0066335	25.4167	12.1131	4.29282	36.9163	57.999	20.6964	0.592279	141.14	55.1255	3.7317	0.0223554	52.799	10.8459	100.782	6.67078	53.8332	68.7339	58.226	23.7488	2.94617	13.8331	18.4761	20.6742	0.106156	1.8975	0.790272	0.501986	3.4843	49.4989	1.87354	0.0678707	21.0681	0.0881952	10.5297	1.38131	6.92631	14.3336	3.9974	92.3644	15.6274	33.7634	115	10.8541	59.8171
TCGA-25-1326	0.149199	0.0254615	65.0347	10.7933	0.0142906	31.5647	3.47529	3.95238	39.1035	125.549	22.073	1.20456	147.167	52.1312	6.53063	0.0596756	109.037	8.9699	59.3971	8.24947	172.955	197.344	62.4558	17.8223	13.5541	13.3475	13.7606	86.4839	0.342039	4.15139	0.856599	2.74606	6.5289	221.107	5.08251	0.0956069	32.2114	0.15199	16.493	1.31973	26.5864	80.6628	8.06409	95.3034	24.2684	51.7593	133.313	13.9111	154.86
TCGA-61-1728	0.294879	0.0832648	119.612	34.8636	0.0278531	35.1909	4.23262	4.36649	41.138	201.993	25.4561	1.08744	267.353	107.656	7.33591	0.119684	101.618	17.038	89.2946	7.11737	346.254	166.112	89.2044	28.3548	23.6987	24.3134	25.4163	58.4666	0.281745	5.12323	0.826849	2.84947	4.2292	412.356	7.82104	0.183062	54.3193	0.184862	17.4327	1.61104	48.0324	73.8456	9.45435	57.2251	22.2882	63.8058	158.98	16.4638	180.783
TCGA-36-1571	0.110187	0.00808163	41.9728	6.2049	0.0126544	33.4008	8.451	4.74176	28.3876	41.1943	25.4525	2.94628	213.84	109.613	6.20267	0.126919	55.9016	17.8041	85.5319	3.70068	121.916	84.0119	59.1883	23.2733	6.28355	14.4325	41.5221	51.2489	0.288937	11.5041	0.983984	2.11273	2.44772	215.405	43.2004	0.0706751	74.0149	0.129941	11.8486	0.600654	16.4464	55.1878	7.9029	39.0923	16.1498	67.2502	73.7029	13.955	57.6798
TCGA-25-1318	1.16785	0.513884	574.305	46.4671	0.0752581	26.7989	1.21198	3.9032	37.8142	208.115	31.2664	1.55473	177.868	82.1823	6.69434	0.126212	226.296	13.7545	69.7693	13.467	230.89	259.758	55.3314	19.6201	31.1419	17.9292	16.032	235.47	0.99536	4.94322	0.895793	3.58315	13.7877	1092.22	7.97085	1.24874	33.6642	0.353959	17.2681	1.74159	154.176	209.752	9.65096	150.254	40.1344	58.8166	70.9611	15.0965	208.467
TCGA-59-2351	0.0679021	0.0121133	11.4916	2.66785	0.00847256	19.974	7.9752	3.42002	19.7302	53.914	21.3408	1.28265	144.981	65.3503	4.68024	0.0347974	34.038	11.4835	76.5317	5.73166	47.4164	95.8033	30.7602	19.0593	5.36423	16.0284	9.28591	19.6085	0.0893554	2.44046	0.785949	1.04656	2.77341	131.33	4.98458	0.0225241	18.2542	0.0621769	7.69377	1.95314	12.7149	25.2038	5.1325	42.5446	17.7453	44.8392	101.441	10.5859	66.015
TCGA-24-1550	0.0708857	0.0156107	8.4517	4.49753	0.0062453	36.0239	7.22629	8.36665	40.7342	39.8738	19.9462	1.10956	128.869	40.3819	9.67131	0.0127424	59.2057	5.84307	62.3651	17.9308	68.011	123.651	24.9218	13.3287	4.44939	12.5305	17.2866	66.2756	0.138992	2.13926	0.694206	1.30051	3.87111	85.5227	0.412695	0.0293438	16.7334	0.0729593	22.8583	0.646454	13.449	94.9998	4.80824	106.529	10.4155	70.7795	106.695	20.2659	92.677
TCGA-13-0887	0.0309307	0.10943	14.7519	8.32352	0.0188638	54.9666	1.88891	6.28487	41.1939	107.544	16.7818	1.22875	297.063	70.6402	11.8881	0.0788061	97.3163	14.6061	145.105	9.14606	115.65	160.469	133.051	26.0445	14.8993	16.8486	31.0053	46.7209	0.206273	4.22355	0.737479	1.94818	5.26415	48.074	8.4548	0.191883	47.9795	0.0860709	18.5117	2.3141	5.0989	34.9999	8.14041	83.5744	14.0539	48.79	106.343	26.3793	81.1286
TCGA-31-1959	0.0406951	0.00622963	6.66504	3.13733	0.00486244	8.83579	12.606	7.79055	41.6533	20.7483	26.9064	1.64287	152.651	45.0005	2.97216	0.0228736	41.9171	8.63141	70.7954	12.7397	19.1394	92.7417	21.8108	12.721	2.88965	14.9678	23.4389	26.9244	0.175268	3.46232	0.852572	1.60129	4.17066	25.8381	1.12748	0.0242031	28.4293	0.0810395	14.8847	1.87158	7.01119	15.4764	5.84885	48.6761	24.8998	36.8113	161.172	6.65738	48.7105
TCGA-13-1477	0.0692164	0.0309394	26.0136	1.30296	0.00930389	25.5643	11.0311	2.52708	47.8976	75.6926	33.3728	0.720224	194.218	220.037	3.66296	0.02707	131.362	19.4421	133.507	6.92968	13.6956	85.3553	95.5949	59.2178	5.96741	22.0253	11.6713	15.6819	0.103136	2.0411	0.878259	1.05257	5.1119	170.682	1.15122	0.150307	26.8126	0.130164	12.1012	0.826037	6.38192	22.0062	5.75028	174.293	28.3302	59.5483	42.7988	14.1333	60.6362
TCGA-09-2048	0.0812032	0.0107074	9.37414	2.50051	0.00567869	81.9444	29.6446	5.39751	74.2977	60.0983	18.9954	2.78589	233.236	194.987	17.5445	0.0541747	183.46	15.3488	153.495	6.94998	19.0103	185.2	156.375	29.0841	6.21686	7.08505	37.1104	27.0201	0.203922	9.94298	0.655948	5.04909	2.37655	27.6883	4.4888	0.0210532	36.0022	0.0782408	16.365	0.188001	6.50042	23.2888	17.2201	184.238	6.51836	43.976	162.945	32.5445	56.7125
TCGA-30-1714	0.190006	0.0313962	38.2614	7.43787	0.0116896	18.6667	52.9926	4.81618	59.3701	126.004	16.9935	0.916755	101.655	112.619	3.55556	0.0580836	307.262	12.6653	106.17	7.98473	242.273	107.429	192.056	28.4632	11.8445	11.8913	21.108	45.8672	0.117872	4.14066	0.675522	2.06096	2.58278	109.357	6.59599	0.0402512	25.5332	0.0401529	19.003	0.292583	18.6532	29.9746	18.2511	86.2034	18.5086	61.1229	61.9016	13.2467	69.1007
TCGA-13-0893	0.0655766	0.0874848	19.6706	13.9444	0.0156551	22.8704	4.07467	6.26403	32.5988	59.9009	24.7062	0.965044	317.388	71.5824	7.3722	0.0619615	87.7504	15.8125	102.249	9.09764	157.182	214.013	41.2518	17.9564	15.6033	23.4146	25.272	71.8498	0.451568	7.47778	0.931048	5.21573	4.4393	176.512	8.6957	0.17103	33.9051	0.130692	25.4362	1.57908	14.7828	77.921	11.4065	37.706	21.0818	67.108	184.091	9.01018	86.0684
TCGA-36-1570	0.0476219	0.0170464	15.0706	3.71681	0.00929744	12.5974	5.6831	2.95674	17.8885	50.0103	20.6172	1.57269	125.946	81.8853	4.71594	0.0697453	53.0225	14.9486	97.597	3.50559	72.3072	109.467	50.9324	24.9383	3.4021	16.3528	35.1057	17.9559	0.2335	8.64526	0.852	1.46554	3.38292	117.678	17.1071	0.0261873	22.2331	0.065744	6.76405	1.16344	6.11299	24.6429	10.4901	36.1377	20.6852	51.5644	68.1275	9.66671	50.1419
TCGA-29-1785	0.0674035	0.0514917	28.2051	3.50456	0.0205353	21.4154	2.97298	3.51612	46.7952	87.1415	43.2155	0.682372	178.574	86.9401	5.53625	0.0828175	126.97	17.286	116.979	7.83377	140.246	146.483	81.5914	29.7922	10.1901	26.4786	42.5618	34.9293	0.265769	6.05461	0.895528	0.810547	3.9501	139.621	5.15594	0.312852	32.9848	0.193664	18.0077	3.00036	9.80485	35.1179	4.80143	101.333	39.3064	53.5117	103.525	8.71203	60.528
TCGA-61-1740	0.0486359	0.0246544	9.49626	4.70505	0.0103213	23.1777	11.1688	4.17826	23.8824	53.1684	23.3941	0.652306	174.392	70.9926	5.60801	0.0809435	101.182	13.6601	86.4177	6.59004	64.1923	114.787	56.9639	16.4617	4.50335	21.2774	16.1459	24.951	0.164269	3.01381	0.767678	2.15947	7.79757	28.4144	15.7241	0.0496408	16.4159	0.0403922	8.75674	3.5003	10.1038	19.5172	9.33761	55.8749	24.3395	33.1215	104.717	10.1841	80.2248
TCGA-25-1870	0.0487601	0.0193479	40.3479	1.66835	0.00677671	18.982	2.39585	2.29086	35.7094	72.0885	21.8966	0.572617	154.453	135.932	5.18321	0.0992178	75.2636	17.8768	69.6499	2.85934	61.3979	55.8495	49.2908	24.9981	1.71164	22.142	9.64516	44.4244	0.171518	2.70164	0.962561	0.738398	3.27555	158.026	19.3398	0.0348836	10.4721	0.121613	7.84979	1.53061	7.38886	18.5283	6.61942	70.7256	20.4558	65.6293	52.2819	11.8349	54.7107
TCGA-13-1403	0.0612897	0.0329722	66.1047	6.64344	0.0181848	21.9108	3.14618	3.46072	64.8001	99.7744	21.0939	0.709812	141.616	76.2175	2.84195	0.056705	145.794	12.9072	94.2804	6.87985	95.0153	128.016	74.968	16.2109	14.3904	14.3668	38.8114	76.5373	0.545027	6.00809	0.904604	1.39248	4.24401	94.4111	4.97594	0.2639	19.2172	0.216046	19.8586	1.22872	12.9039	46.4866	12.9911	98.879	22.0187	53.4164	47.6515	11.3967	70.6046
TCGA-61-1741	0.0206608	0.0105772	7.19891	1.07865	0.00731663	17.4552	1.0537	3.2544	41.2232	31.5231	21.2446	0.763548	157.017	88.9569	4.64881	0.0296538	76.5749	12.1314	90.0018	3.58151	133.077	73.9635	24.4656	11.5062	1.54685	13.5354	12.8135	33.1873	0.109997	2.58088	0.910208	0.731716	2.5121	35.1636	4.59215	0.0166844	10.1079	0.0706033	11.2467	0.558878	2.28764	8.80082	6.5792	50.331	9.37822	58.4534	56.0603	11.9766	25.0523
TCGA-24-1553	0.115484	0.0389749	19.4399	4.49815	0.00812734	11.1994	6.21687	3.12638	36.3861	55.0387	24.202	0.352998	102.893	60.3357	2.2958	0.021177	41.9718	12.5012	76.7861	5.17174	80.2569	80.8884	33.4594	14.8044	3.21274	21.1639	7.54569	30.3609	0.0778167	1.44237	0.770535	0.920952	3.23493	153.659	1.29677	0.0350025	23.3889	0.110142	9.03904	3.17322	15.8066	27.6365	4.13562	70.0637	28.4127	41.1148	72.049	7.09213	84.7605
TCGA-24-2038	0.0445572	0.0320673	30.1058	2.20578	0.00881163	31.6481	42.1816	4.2834	57.7784	60.9581	22.18	1.73044	135.095	101.984	5.07967	0.0492374	92.1492	14.9296	99.6227	7.2037	42.466	66.0007	97.3679	29.9065	3.25356	15.125	17.7541	22.8044	0.0825341	2.23328	0.861891	0.388187	2.54356	227.643	9.55203	0.0842881	19.7712	0.104036	11.595	0.923403	7.22161	21.1881	5.95013	82.863	21.4133	64.5341	53.8118	12.5514	65.7127
TCGA-29-1702	0.138058	0.00935776	17.4403	2.02139	0.0116676	27.8143	8.05229	3.81012	22.9321	43.3565	12.61	1.11256	177.688	63.1528	5.81846	0.028484	66.1272	9.09593	82.9678	5.82143	133.018	125.563	14.9858	11.4341	4.58943	10.6032	18.69	24.9065	0.148086	4.63244	0.795813	2.5905	2.52795	273.431	1.91612	0.0506094	35.2422	0.0934708	12.9712	0.212004	11.6688	42.4943	4.96203	66.2566	3.87542	46.2915	175.734	11.2238	35.7519
TCGA-29-1698	0.0268861	0.00415383	16.4819	1.58668	0.00289868	8.69821	2.17201	1.7494	19.3709	33.0594	17.3128	0.48933	142.185	60.6759	1.36562	0.0174576	26.4081	9.89764	79.2252	2.46822	32.6997	47.7804	17.8846	10.1164	0.867723	9.45278	5.16175	27.0041	0.11354	1.82189	0.791882	0.968033	2.10714	23.3688	0.949664	0.0098399	8.63764	0.0453918	6.19703	0.752331	4.18331	11.7077	7.70605	45.532	9.99729	35.2608	41.6615	6.35085	38.0695
TCGA-61-1721	0.105724	0.0208001	22.9702	2.72557	0.00913205	48.4151	54.8708	4.03782	26.5247	38.3614	26.7886	1.5551	72.4192	58.8747	13.4685	0.0139644	62.9825	5.91177	77.7892	16.9568	15.526	145.649	47.9591	32.9954	2.37919	10.4099	9.81562	18.1061	0.0347653	1.20946	0.664743	1.25661	3.09698	140.164	0.589895	0.0722445	17.8946	0.0935385	18.1679	0.594046	11.7798	33.4749	4.41519	109.527	23.3455	86.0552	75.4689	30.2151	53.6942
TCGA-13-1409	0.109333	0.0301465	28.9541	9.14956	0.00939535	37.0007	9.63293	3.87227	30.6666	76.5515	21.8016	0.848218	158.337	185.987	7.04064	0.0527596	142.893	17.5934	117.297	6.85966	111.784	106.343	59.3382	35.5307	7.42182	16.1937	5.70355	36.1075	0.0626947	1.42945	0.849465	2.34066	3.38654	347.427	7.91142	0.0336623	32.845	0.0408569	16.1287	0.623639	13.1719	41.6666	6.183	88.0976	18.0056	70.7795	38.007	33.4769	42.673
TCGA-24-1418	0.0795945	0.0216829	30.1941	4.87749	0.0114395	28.7446	7.67564	5.28974	50.6939	78.2503	38.6806	1.19035	185.167	83.0045	6.20875	0.029039	139.126	12.6952	99.0106	8.6523	162.238	151.406	50.9284	19.7733	3.87344	16.8084	32.175	64.0778	0.163058	4.70671	0.882497	1.56814	2.88284	209.155	2.05494	0.0585374	22.1433	0.176454	21.3834	0.786527	12.7346	53.1279	10.3791	102.428	23.4122	77.1933	116.959	14.1694	67.9564
TCGA-13-2060	0.122698	0.00651575	19.0362	3.08495	0.00369882	10.2111	3.09312	1.56314	20.5454	81.7131	18.8885	0.285046	110.996	73.5286	3.51775	0.0497878	116.316	14.4824	117.844	1.74017	99.8087	81.1117	26.6859	25.9167	3.63354	12.5914	16.3596	35.9535	0.239258	3.53622	0.759298	1.18801	4.19684	78.8305	7.86164	0.0289403	19.3825	0.130857	7.36945	1.32015	10.0155	42.7613	6.28794	79.0089	14.2324	53.215	47.0934	4.91695	85.1587
TCGA-04-1350	0.208058	0.0574733	52.3322	10.0822	0.0144804	35.2444	15.3324	2.73101	47.9879	139.409	22.2413	1.25973	186.08	126.139	3.91663	0.0306579	120.078	14.2078	120.356	7.93283	163.541	94.9316	73.3119	34.6852	10.3967	12.4562	8.69558	30.4511	0.0937765	1.35992	0.797403	4.15614	3.07421	325.263	2.21664	0.0830914	46.8161	0.132135	16.3829	0.294051	17.3242	41.4537	6.64838	134.489	14.2212	77.0693	51.7481	20.8271	90.7434
TCGA-04-1542	0.617324	0.0477407	55.2934	7.28459	0.00828176	18.7541	11.4891	2.69802	39.5626	75.0217	22.1291	0.962871	219.666	134.757	4.71718	0.056855	102.16	16.5377	119.179	11.8451	93.7286	86.4598	66.3302	33.3286	13.8589	19.9638	7.80163	20.5359	0.125409	2.67552	0.876627	2.48302	4.04023	308.139	4.19545	0.0465143	55.1159	0.07937	18.6005	1.0024	51.4826	96.4387	4.88964	64.9918	19.2815	64.648	97.402	10.7917	98.2371
TCGA-13-0714	0.137375	0.0404209	127.143	4.49334	0.00981635	22.3196	1.47218	1.26174	19.6609	149.304	30.9654	0.3405	189.584	114.364	3.25482	0.0434837	94.1531	16.7912	110.834	6.40912	63.583	50.9342	54.6632	33.9402	5.34946	21.5245	15.0561	36.3543	0.428162	3.24902	0.897214	0.605369	4.92804	334.423	2.10222	0.203878	11.1918	0.333176	7.35631	2.22268	21.5986	62.7476	5.47899	122.834	41.2567	40.9603	44.3972	11.9015	116.944
TCGA-57-1993	0.0608738	0.0169039	30.5466	3.64789	0.011172	32.2023	5.13621	4.23893	30.9199	56.4177	29.7795	1.80758	226.531	83.5464	7.96053	0.0740146	33.4119	15.6027	82.7671	4.10871	121.832	112.734	41.403	16.6843	3.88406	22.7794	39.3164	32.2948	0.199576	5.78001	1.07556	1.30568	3.8359	99.0762	9.60899	0.0305926	18.3649	0.215939	9.98257	1.90491	11.7001	22.5386	8.72295	45.2746	27.061	69.6356	64.6368	15.0703	68.6089
TCGA-09-1668	0.0706615	0.068269	24.6032	8.44524	0.0271885	30.4932	3.32821	4.058	50.3757	61.2089	40.3778	1.41469	177.428	132.168	6.60895	0.064886	142.004	20.9935	105.724	8.92784	133.613	138.444	58.6806	20.8195	7.50506	28.9098	64.2153	89.0798	0.49235	10.6284	1.0926	1.60556	4.95765	147.926	8.24702	0.285759	20.2168	0.235316	15.6911	2.79289	11.362	47.5189	17.5221	79.8756	42.4646	68.4534	44.4038	13.7948	59.7394
TCGA-25-1314	0.30808	0.132869	73.2795	19.9787	0.0284675	24.4574	16.2454	5.73514	45.6827	77.0765	27.4878	1.58716	190.007	111.143	6.12206	0.0487221	92.9767	17.6476	116.895	10.1265	190.665	222.023	58.9097	23.3116	9.78792	25.4265	32.5895	63.5936	0.306211	5.45071	1.00049	2.60233	3.79228	544.594	3.70529	0.215515	37.6526	0.0973253	18.1515	1.28966	44.2051	81.1076	9.97359	56.2127	38.9063	61.5819	108.716	19.8021	83.2507
TCGA-25-1634	0.184501	0.0216188	33.3829	1.71957	0.00671016	26.1396	8.58879	1.90643	43.0261	84.7984	27.6424	0.799663	205.283	203.998	6.41885	0.0483378	120.174	17.4249	110.209	2.67023	49.7332	80.4192	49.5379	31.7482	5.57385	12.5391	9.12428	27.8623	0.114488	1.93288	0.855996	2.1593	3.20222	265.117	3.80369	0.0374402	36.1218	0.143283	10.4397	0.327554	15.082	57.7394	5.87096	194.433	16.0915	65.2208	78.475	14.5349	79.6102
TCGA-24-1924	0.0400167	0.0186503	5.64894	4.56983	0.0121865	31.4133	3.58764	5.4414	26.8839	66.9832	10.062	0.682826	166.78	32.6773	11.5911	0.0506622	103.423	8.26347	84.811	5.23237	106.455	107.887	43.4531	11.9821	7.47157	13.1383	21.6247	29.8123	0.183387	5.83252	0.674632	2.22565	2.99014	57.6034	8.65373	0.0469948	28.8903	0.0893777	13.3839	1.49509	5.7144	18.5074	12.9996	81.4703	7.94414	37.9019	125.185	13.209	61.6414
TCGA-25-2042	0.0853663	0.0207009	40.1186	16.6831	0.011914	29.3995	16.9317	2.90738	38.4753	66.3615	33.4707	1.6378	98.7165	43.3093	7.59781	0.00897185	66.3319	6.36463	61.0456	12.2052	22.3517	148.249	23.5974	15.2731	3.60561	11.9855	38.898	46.8183	0.201766	4.43298	0.827486	0.771285	3.84771	192.7	0.758078	0.125961	11.6742	0.157802	20.4463	1.48202	17.5698	67.7028	5.0407	128.924	34.2128	58.1485	84.9755	20.6409	73.69
TCGA-24-2280	0.0416361	0.00980166	10.0716	2.10198	0.00720333	29.1393	4.3491	3.91687	35.0278	42.2773	19.1839	0.779981	129.447	86.9006	7.49164	0.0179408	48.1427	10.4362	82.9704	4.52277	20.8296	104.786	19.8812	15.2416	1.61304	12.3082	16.1641	24.7594	0.10999	2.92588	0.723024	1.03999	2.43223	60.4721	1.9968	0.0268375	12.8069	0.061415	11.0343	0.797859	9.58578	22.5295	5.94715	67.8687	11.3995	56.9612	39.1166	16.9101	25.2749
TCGA-61-1743	0.0507546	0.0238251	10.9791	4.71047	0.0181154	11.2345	4.2144	4.44059	48.7892	22.9028	23.2407	1.61453	243.368	96.1324	0.475033	0.0577094	21.5406	15.6285	69.6617	7.83281	93.0471	59.6478	30.2061	12.1433	3.7971	29.1679	9.87026	26.8413	0.12668	2.95576	0.956952	3.25322	2.82234	80.6529	6.81586	0.0539478	21.3048	0.0570557	15.8726	1.19976	10.8209	38.5661	29.9547	20.5162	17.9385	44.2697	80.4047	9.5359	12.5189
TCGA-20-1683	1.27388	0.0262929	62.7298	17.6091	0.0256275	83.3425	128.961	10.7676	21.4252	78.6249	16.982	0.927774	175.754	69.8173	33.024	0.0462998	442.911	9.0855	84.4188	9.46192	457.256	189.371	50.0328	13.3276	27.9249	10.5273	21.0151	72.717	0.145219	4.22793	0.706064	7.19505	4.41285	95.3644	31.4886	0.0304309	20.1912	0.0622075	29.3178	0.466581	243.839	194.176	18.6341	69.1747	10.2446	62.0281	75.7125	49.2312	104.738
TCGA-04-1361	0.0869053	0.0264954	20.1927	7.21707	0.0123593	25.0105	3.76312	5.6885	27.6187	77.0043	27.8166	1.15806	212.875	84.2308	8.34685	0.0502245	88.0008	13.8591	119.377	12.3564	94.3691	102.492	38.2423	22.6695	10.3004	19.1728	25.391	38.036	0.357675	5.02521	0.821359	2.23304	5.60719	53.9801	3.74565	0.0863784	28.4504	0.214812	16.1412	1.77194	13.6823	51.7049	7.07396	69.221	25.6982	49.9774	101.926	12.5969	64.6714
TCGA-13-1499	0.0460405	0.00985713	9.66014	2.49807	0.00779537	42.6241	3.21544	2.09227	25.8898	36.6424	26.9548	0.71634	142.045	68.8165	6.74942	0.016456	54.6544	10.5917	79.8265	7.08047	46.8086	79.4673	29.2522	19.2065	3.8538	17.1169	12.4595	16.4891	0.117135	2.83885	0.758008	1.05929	1.90589	40.8419	1.17774	0.0470307	17.2678	0.110349	14.8393	1.60724	7.48906	22.6898	5.73781	61.3446	15.2424	47.6267	65.6742	22.1645	26.5726
TCGA-61-1995	0.0722654	0.0115963	32.6817	8.73776	0.00812204	20.8157	4.54436	6.06506	27.931	76.8949	17.5386	2.1448	244.45	85.7333	4.63347	0.0679643	64.3252	16.2578	116.852	6.80364	143.462	168.643	43.7702	13.9411	5.85476	11.8889	29.7158	63.5015	0.192565	5.57438	1.02175	1.77943	6.32492	239.213	11.5989	0.0433612	39.6834	0.166088	11.5309	0.962822	11.7322	50.859	6.44073	33.4533	13.5003	55.3633	110.933	10.6671	92.3976
TCGA-10-0927	0.111409	0.0262396	49.6482	7.43965	0.00670629	43.6556	6.84581	3.12822	32.7615	108.601	27.0837	1.85471	237.138	136.844	12.0009	0.0621398	95.1506	16.7623	120.889	7.1849	72.1261	87.3217	117.668	37.9941	3.86274	16.179	12.3781	28.9212	0.137828	1.94803	0.747334	2.8892	3.9091	343.288	5.92096	0.0666464	40.9589	0.0863188	12.6491	0.710446	13.047	67.1818	4.77732	102.666	15.6869	73.7761	78.1251	21.2897	120.283
TCGA-24-1850	0.0709697	0.0075698	8.67426	9.54012	0.00617156	24.5865	2.80658	2.94697	38.5923	73.9165	24.7439	1.78477	187.078	92.176	8.25406	0.0402644	125.68	13.2846	107.277	11.9033	67.8727	162.047	23.5228	27.9837	9.65659	25.8653	26.5478	49.0368	0.116274	2.29647	0.811262	2.53033	9.92916	65.9753	1.57636	0.0180518	37.1589	0.121483	14.732	1.34707	15.9011	17.4746	5.97563	156.522	18.3318	56.8808	135.732	20.1994	88.7782
TCGA-24-2267	0.0290381	0.0174659	10.417	1.81885	0.00696986	12.5964	3.1109	3.13303	24.2385	39.7124	26.9873	0.54925	67.7964	56.8143	3.65109	0.0519618	50.832	9.32495	79.3177	4.69414	30.0182	59.5643	28.6092	19.7163	0.985726	21.1376	11.636	24.207	0.104697	2.3525	0.576758	0.480795	3.15399	37.2418	3.29432	0.027329	11.0939	0.0549869	8.34931	5.6198	4.21634	12.4941	5.41068	68.5004	10.8866	32.5302	32.9202	10.113	36.9495
TCGA-25-2393	0.0266041	0.00238859	6.58802	0.361784	0.00258411	16.3507	12.7327	2.3887	32.1913	42.8415	16.5199	0.321073	187.152	154.209	4.12743	0.0287429	63.6888	14.5479	118.939	1.3785	43.0705	52.2989	49.2824	30.456	0.678222	11.0354	10.4999	10.6513	0.0480011	2.7088	0.782438	1.72125	1.57776	36.8034	6.81499	0.00551158	19.5363	0.0526004	7.61517	0.219422	4.11176	13.2049	4.935	66.4239	7.71062	60.2017	76.0559	11.0409	43.3615
TCGA-WR-A838	0.00667084	0.000823768	1.89164	0.113854	0.00130785	4.20302	6.44351	1.79142	2.61658	17.2721	13.2787	0.275149	132.282	106.963	1.06094	0.00986908	10.6363	13.8008	105.122	0.613982	7.0644	36.1798	14.6177	22.8999	0.18446	14.8006	6.15635	1.88693	0.0714913	1.15854	0.863738	0.395313	1.28344	19.7239	3.63573	0.00181	4.48354	0.0268266	2.20483	0.224289	0.742913	2.70021	1.90692	16.6002	4.45616	78.8531	68.8787	3.99943	17.3926
TCGA-25-1635	0.0956943	0.0579117	53.451	11.1817	0.034577	64.2912	5.1544	8.29572	64.8607	58.2559	34.7809	2.97903	180.03	66.693	11.2177	0.0785543	64.9075	12.4607	73.9117	13.9079	192.315	272.251	132.3	18.3627	8.76882	20.6585	32.1327	121.955	0.469458	5.86499	0.849283	2.67253	5.30877	283.042	6.0383	0.467228	46	0.172555	23.9734	1.7183	23.7629	54.6523	8.47545	78.9818	29.4813	47.6144	177.26	20.0418	124.639
TCGA-13-0727	0.0238813	0.0241277	15.885	6.55277	0.0069176	30.3604	6.48177	3.16905	47.6885	91.5818	25.1754	0.697519	434.306	141.571	6.40922	0.0273841	81.2207	17.9481	114.061	6.4553	243.264	92.5449	70.3311	23.3596	9.14527	29.1528	8.69703	18.2427	0.0668526	1.25892	0.839077	1.12257	3.18027	47.8246	1.66943	0.0266617	30.9173	0.076373	15.2706	1.78188	3.7895	30.2779	5.23984	79.6943	25.1994	57.0661	41.9848	30.7146	68.4495
TCGA-24-1428	0.0299896	0.0100343	9.23595	1.97116	0.0064507	23.2965	3.51705	3.5081	13.4817	44.7501	18.2476	0.404786	205.696	66.7185	6.51747	0.0190735	44.3628	11.5902	137.082	4.39629	80.2783	92.149	50.9548	17.1879	4.60693	14.672	8.51923	10.4998	0.0901278	2.03378	0.757437	0.874092	3.36457	36.1471	3.39754	0.041821	10.822	0.0589263	8.05154	1.67473	3.86219	11.4047	4.27363	40.9059	14.7171	35.8574	123.732	9.60745	66.425
TCGA-25-1324	0.107094	0.0145077	86.9189	3.66637	0.0228192	34.2397	5.22838	2.43324	49.6341	84.5762	34.6185	1.40044	321.082	196.893	10.0136	0.0898743	52.9464	21.0555	96.0674	4.23475	241.088	98.8136	26.7365	24.246	3.16831	17.3899	17.0929	28.7705	0.171028	5.19083	1.08791	3.03651	2.37393	398.257	13.1812	0.106505	21.7291	0.133877	9.99378	0.634521	15.113	70.0571	5.25228	54.1761	12.046	99.3457	162.05	18.2719	120.436
TCGA-31-1946	0.0659594	0.0149296	28.8787	7.2198	0.00992332	17.8101	6.67268	4.44278	34.6051	69.6644	26.9657	1.02756	136.095	51.2067	4.56736	0.0433671	52.0184	10.7664	86.2243	7.343	75.4677	118.401	45.8892	16.6764	4.66648	15.7724	25.1505	32.0741	0.259133	4.35835	0.846647	1.20627	3.95315	44.8634	3.94106	0.0438428	19.4703	0.132492	16.3137	2.11074	12.8401	33.1589	5.6923	58.1694	27.9224	42.7676	136.111	10.5778	53.774
TCGA-29-1774	0.0836531	0.0278663	18.4622	3.29057	0.0267857	48.4026	4.60814	4.99742	46.9594	91.6727	25.6535	2.06937	444.568	135.628	18.6905	0.0767929	164.015	15.3284	115.054	12.3917	184.042	162.807	51.4747	32.5083	8.61195	16.9028	33.0826	33.2859	0.0877499	4.39274	0.800564	1.99107	3.48976	151.471	6.09374	0.1043	42.3048	0.0925698	13.3199	0.701812	15.5038	25.5562	8.93695	77.4105	9.48484	78.3306	187.977	24.3788	72.2833
TCGA-23-1022	0.179947	0.0325077	40.5758	12.1911	0.0100677	29.8589	18.6507	4.14751	42.8147	134.255	25.5631	1.21415	319.216	124.863	6.95898	0.0520358	99.2549	16.128	113.888	14.4631	190.55	153.697	96.2772	30.9051	16.0621	19.8829	7.66226	23.4746	0.176598	1.72011	0.772464	1.62317	5.69868	240.021	2.0886	0.0612395	45.6185	0.0871252	19.138	0.630889	17.6687	50.46	3.98158	108.167	18.5016	51.04	126.735	19.8381	121.256
TCGA-24-1564	0.0747587	0.00755713	14.6511	3.46086	0.00720167	13.9341	7.29724	5.06161	29.1089	35.0485	19.8643	1.1254	108.663	36.7277	3.97481	0.0237283	39.2947	7.51323	57.9898	6.75137	21.864	127.892	24.9317	10.8983	6.1575	11.0619	17.2958	32.2217	0.105133	3.58329	0.820772	1.11347	4.02525	26.6559	3.48428	0.0310244	26.0932	0.088294	12.0194	2.09101	13.0087	28.5926	5.87182	62.6233	18.4814	38.2358	82.7688	7.19858	32.7816
TCGA-36-1568	0.126394	0.0367123	73.2398	8.52239	0.0124634	18.3334	11.112	7.52615	50.6336	101.175	24.3823	1.16852	174.007	71.9244	5.88625	0.0633361	124.089	12	81.4758	11.647	107.144	104.37	109.126	17.852	7.24138	17.7156	28.8198	43.9052	0.258906	4.13293	0.933644	0.950433	5.00366	222.271	11.5131	0.067338	25.6835	0.11624	14.9883	2.34147	15.0989	66.2151	8.39239	83.0901	36.497	42.3377	71.5887	13.0646	100.022
TCGA-36-1577	0.395547	0.016711	56.7939	5.40965	0.00810876	41.6806	19.9801	10.8903	68.7031	81.8005	9.57998	1.45464	231.535	56.5931	8.79596	0.0409549	89.2081	9.88886	93.6086	10.6298	308.945	208.092	33.6995	11.0184	11.5303	8.96366	70.5084	44.4383	0.734103	11.9647	0.855315	4.67437	4.33729	78.7372	6.38579	0.0407502	42.0765	0.159965	22.7408	0.178635	59.6001	34.9566	13.8642	73.7965	5.51101	43.1734	552.737	18.7026	101.943
TCGA-24-1423	0.387926	0.209525	130.458	22.3978	0.038971	36.7318	6.2987	11.2765	94.4865	82.263	34.1241	3.00924	212.263	75.2589	10.4434	0.194035	160.017	13.5705	77.2493	23.5364	222.008	332.723	94.7634	17.7089	54.2164	19.9475	41.3581	164.936	0.313648	7.60279	0.980428	2.14518	7.63087	493.023	12.9817	0.351862	64.7426	0.199945	39.0042	2.10632	47.3457	133.295	14.1453	106.151	29.9598	49.2328	208.863	19.4147	154.083
TCGA-36-1581	0.0523783	0.0168119	3.34044	1.38406	0.00856119	17.6123	2.17296	4.33334	35.9903	25.2763	26.9185	1.13111	136.587	48.9902	3.64779	0.0466049	70.3561	12.0035	67.6407	4.22967	44.8518	113.425	15.3409	9.88508	8.05169	24.2144	10.0581	35.1542	0.12798	2.22453	0.776118	3.10731	8.61856	43.5073	18.521	0.0260357	17.3999	0.0388011	12.5818	4.00321	7.60593	47.6552	16.3006	81.0565	19.1651	38.5904	95.1772	8.97565	26.5456
TCGA-61-1900	0.104139	0.0249853	17.706	10.1104	0.0116222	19.7243	20.7837	7.90745	105.437	79.6838	24.2936	2.67962	369.397	107.337	8.73327	0.0558152	135.867	12.4936	90.2814	10.9881	359.575	125.574	68.2248	14.1621	4.91437	15.1758	60.3207	59.062	0.621826	9.10119	0.914537	3.60189	4.76104	152.17	12.3844	0.0615657	27.2423	0.125273	20.4797	0.409403	19.2716	52.6155	14.1436	113.058	12.3312	64.6322	155.175	11.9692	94.0173
TCGA-04-1347	0.106332	0.00819056	12.0908	7.53017	0.0033343	29.2876	9.23622	1.76524	38.2777	108.036	22.6862	0.534435	205.585	180.793	6.83867	0.0531086	112.988	16.9192	126.698	3.15027	149.164	57.1225	65.5416	27.4807	3.82566	13.5069	6.30236	28.4552	0.0919534	1.6898	0.646712	2.94334	2.77084	65.006	3.63685	0.0138038	27.9662	0.0831501	9.66195	0.766706	7.02541	42.6258	5.60727	170.84	17.4163	50.1851	36.3797	19.3951	98.3288
TCGA-29-A5NZ	0.0478593	0.00458772	6.44012	1.31952	0.0054025	13.3416	9.56981	3.36965	35.4741	17.6919	23.0226	1.92594	224.567	96.1226	3.37417	0.0153958	26.4003	11.5206	67.7958	3.34277	12.9179	98.8312	23.7721	11.4151	1.20292	12.4349	7.52103	22.933	0.0923226	2.35452	1.12811	1.92032	2.03007	83.518	4.90347	0.0104336	13.7244	0.0670846	10.2602	0.464644	6.39781	27.6279	5.57304	33.5806	7.74126	80.8833	104.425	9.61123	17.9975
TCGA-23-2078	0.0447862	0.0129045	14.2543	1.36682	0.0101308	21.1361	9.96964	3.88611	41.6694	49.9646	19.3911	0.81838	190.498	75.1692	5.67449	0.0254006	57.8103	11.9319	86.2005	4.80127	35.3231	147.334	46.557	15.6844	4.67626	14.0292	30.4473	21.4004	0.171175	6.19258	0.84548	0.856457	4.72678	74.84	3.83686	0.0598595	26.3024	0.0864649	13.3787	0.962339	8.42405	33.6402	5.81207	108.894	14.0409	47.3281	109.762	15.1482	58.3799
TCGA-29-1711	0.133756	0.0185393	44.3769	11.0034	0.0135611	16.0962	11.1427	17.5526	61.4395	104.646	28.0683	0.872837	174.599	81.6028	5.59051	0.057449	163.482	16.4551	90.366	7.77219	200.65	206.327	56.4436	20.4686	18.3927	29.6337	52.9981	106.295	0.45966	6.68749	0.906318	0.804451	7.81608	121.926	5.90066	0.128279	38.9971	0.176083	21.6591	4.34494	27.7997	134.659	9.03316	80.8646	30.3207	48.7777	102.11	10.8759	131.822
TCGA-29-1705	0.0787506	0.0175181	35.4882	6.18121	0.00993528	28.7032	20.0553	4.07281	44.4302	86.8953	25.4098	1.01274	164.733	73.4422	5.77609	0.0480281	70.6763	11.764	80.7896	4.65858	89.4378	171.381	98.5823	23.9505	6.90834	20.2967	30.3352	23.4261	0.228846	6.15375	0.868218	0.926676	4.62383	111.421	6.84329	0.0412652	36.5948	0.163387	14.7232	1.16196	16.2305	37.938	7.5669	94.0093	24.3394	56.1138	143.012	13.0602	91.3499
TCGA-30-1892	0.190531	0.0401546	44.3555	16.9122	0.0152039	41.6241	31.7102	5.65541	41.0111	139.674	30.3761	1.01556	122.02	67.5368	7.69246	0.0204087	167.758	9.61392	101.387	13.8912	100.26	117.296	105.357	33.9944	9.63794	14.5733	22.5313	37.8237	0.0870843	3.04606	0.627312	1.91458	3.11515	102.096	0.663249	0.117541	26.8713	0.123063	27.1321	0.699399	26.2087	53.0786	9.85389	157.215	24.3022	69.8341	71.9219	21.1511	103.736
TCGA-29-1769	0.057676	0.0171769	5.45028	3.25165	0.00615985	35.589	8.00634	4.41222	29.7563	83.1992	29.7791	0.386653	293.276	83.4943	10.3594	0.0259362	123.696	14.4577	149.19	6.69153	479.945	174.036	68.371	22.4595	8.9305	16.7864	36.135	31.6629	0.193861	3.67246	0.770283	0.930533	4.19566	26.2914	1.3722	0.034984	20.5767	0.13897	21.7855	0.86349	7.93784	36.2625	7.35383	69.8676	18.9596	61.7207	188.067	11.5681	74.489
TCGA-29-2414	0.0529754	0.0131689	20.1243	2.42339	0.008024	20.8698	19.9472	3.81124	28.3903	46.9723	22.0474	1.10123	179.325	111.618	5.59917	0.0378319	52.363	12.9666	94.7724	4.88599	53.3043	68.3397	40.7695	25.0206	3.12133	18.2387	10.9349	19.799	0.0839992	2.96259	0.780665	2.05917	2.35309	111.427	3.89061	0.0233942	27.8716	0.0826249	11.7198	0.937832	7.42414	35.8087	7.23485	56.4661	17.263	69.2991	60.3167	16.322	34.305
TCGA-20-1682	0.0956777	0.0571196	25.4305	18.4784	0.0137594	19.3281	7.03783	3.44952	34.2176	88.2812	19.2597	1.57347	203.402	56.1569	3.48464	0.0552795	66.5017	11.0823	70.0185	6.65117	120.157	91.1598	80.9824	17.6194	6.87473	13.2117	7.17369	69.2587	0.132502	3.01432	0.745254	5.13651	5.11016	158.016	7.75003	0.0872878	27.5309	0.103599	12.6036	1.82481	15.1807	32.0618	11.5748	64.0323	18.6244	45.7813	240.182	10.5859	101.381
TCGA-25-1329	0.302516	0.17429	172.796	53.8757	0.0734693	34.7061	2.16944	3.79886	53.8098	149.936	35.1709	1.17118	266.987	109.495	10.1223	0.108814	136.767	17.3364	75.159	11.4346	199.861	242.427	60.9916	24.8424	11.1381	23.6828	28.2299	145.357	0.250425	4.46344	0.973453	2.64129	4.81107	311.498	3.08812	1.01552	30.252	0.215245	19.1639	1.73771	79.6704	47.1309	6.92365	127.256	36.2907	72.9372	87.3859	17.1315	261.058
TCGA-24-1470	0.0411638	0.0252828	25.8373	4.07785	0.013053	21.2916	3.22694	5.98809	42.548	45.3786	13.5114	0.620104	132.277	45.0916	4.52366	0.061151	80.2194	10.7067	80.032	7.47499	163.954	97.234	78.4678	8.90799	3.3631	10.7275	38.3296	69.8194	0.491945	8.77558	0.892922	1.01195	5.45778	63.8222	11.3373	0.111932	11.3808	0.239397	14.5029	2.01473	7.569	22.6515	12.1349	38.4713	11.683	26.41	72.3586	6.7898	48.6515
TCGA-24-0970	0.10164	0.0136958	27.3671	1.92153	0.00418397	16.1355	1.39017	1.36535	15.676	109.176	22.6627	0.389109	184.329	111.473	4.07289	0.0307199	94.6079	16.7378	133.163	3.04852	36.8466	67.2892	29.5713	29.6578	3.36251	15.9057	15.2696	25.311	0.196809	2.8049	0.89862	0.55136	7.10172	54.8689	1.61863	0.0172567	15.757	0.156287	6.51326	1.30626	12.7765	28.3527	6.75225	141.235	18.1647	47.3971	45.5333	17.2693	105.906
TCGA-10-0937	0.0752306	0.021373	17.1074	10.2069	0.00677341	24.8419	23.0964	6.70753	35.8283	87.0892	27.5786	0.641478	189.972	95.1865	4.81415	0.0482993	88.9939	15.5964	155.421	8.85438	175.651	85.8208	151.494	37.1468	6.09163	22.0592	18.3149	17.1022	0.144007	2.98926	0.693865	2.81086	2.98489	55.0304	2.62925	0.0365015	39.828	0.114893	19.7088	1.51168	7.35702	37.8897	11.757	55.9707	25.2239	45.5367	150.058	13.4175	81.2553
TCGA-13-0795	0.144167	0.0228672	13.9388	11.0122	0.00611964	26.5347	2.91015	4.25952	24.8684	111.273	19.4721	0.437011	101.46	59.4346	10.3132	0.0502312	117.019	11.534	93.7237	6.84849	304.745	116.688	74.8149	22.8776	5.21533	17.5321	18.9715	85.08	0.267349	3.10691	0.657697	1.9599	4.3163	69.3361	3.48601	0.0328313	19.7386	0.148944	13.6093	1.6848	16.4722	43.4965	8.55143	84.1469	21.4327	46.6581	72.5447	11.9336	78.8507
TCGA-30-1718	0.0612503	0.0302574	11.7248	2.31809	0.0119639	37.163	10.6035	7.71822	24.4184	80.1749	26.4224	0.932272	213.238	58.975	8.37925	0.0226693	105.096	11.4581	103.942	9.49191	113.11	262.696	56.3071	19.691	25.8637	19.8873	20.3352	32.8993	0.218307	3.90465	0.742809	1.88283	4.4719	53.2159	2.0288	0.0456071	26.3872	0.0811866	20.8768	1.39991	15.7945	65.2314	9.87861	74.4456	22.4001	48.6786	239.856	18.5045	51.7169
TCGA-61-1725	0.0700274	0.0134548	11.5192	6.12455	0.0051777	21.4949	30.6128	5.74541	29.9619	98.7415	18.8294	0.79165	144.1	67.1096	6.3693	0.076446	103.846	11.2728	124.867	4.21934	46.0414	75.3578	150.182	27.9322	6.8495	11.8717	24.6835	12.2734	0.0777286	4.33127	0.59353	3.5054	2.29552	35.2333	5.8213	0.0169941	36.7149	0.0436862	13.8156	0.885821	9.64714	22.996	9.77109	63.2299	18.5045	45.1093	154.195	8.8298	95.1809
TCGA-25-2399	0.0284139	0.0102196	11.6297	2.47764	0.00977466	19.8372	8.10908	6.17965	37.704	55.694	21.7016	0.828886	176.448	90.5144	7.26469	0.0380888	43.2278	16.0906	106.282	6.31281	62.4731	87.0112	34.0017	19.3381	4.06158	20.4279	36.4889	21.4455	0.27757	6.79892	0.945646	0.999519	2.92143	66.7436	5.82067	0.0424132	18.165	0.153449	15.3499	1.50275	6.3453	28.6458	5.93656	53.7357	15.7812	65.1297	77.8663	13.9292	50.5348
TCGA-24-1845	0.275396	0.253701	82.2051	13.7675	0.0169992	22.0282	1.26477	1.96647	22.0375	211.776	18.9755	0.541358	122.075	102.07	9.07109	0.120133	192.59	14.9995	109.841	6.37147	128.775	89.16	62.5727	23.8662	9.36729	11.0684	13.4774	88.261	0.431101	2.96325	0.774934	2.28036	7.31934	391.096	9.55401	0.180267	15.6802	0.11374	8.95784	1.09311	30.9691	89.5026	11.0345	154.112	22.3182	33.9905	43.5076	19.63	173.907
TCGA-61-2094	0.281943	0.0112498	22.9927	3.12135	0.00776781	36.6354	9.85944	13.4062	35.998	26.9934	17.0806	0.884943	34.9462	36.1505	18.4324	0.101	221.578	9.52354	52.4947	3.99556	168.905	71.7487	25.1993	9.96402	31.0211	12.0207	35.6507	92.2565	0.0847982	5.04635	0.523702	2.56428	1.78111	435.658	32.5243	0.030307	24.7025	0.133617	10.6609	7.03382	56.5421	69.3252	12.1792	81.5066	11.6643	13.9354	268.954	14.1081	160.509
TCGA-29-2428	0.0653114	0.0540261	7.53516	3.60613	0.024701	39.4151	5.70847	2.78949	48.2401	89.8532	27.0669	1.00975	285.908	90.2325	8.01076	0.0718346	90.8689	17.8484	84.912	13.1271	181.824	234.591	58.4313	30.1153	14.7033	36.9257	10.4929	30.347	0.229853	3.58539	0.839382	1.38305	6.77172	52.2937	9.39946	0.115415	32.8822	0.117542	14.0504	3.48821	8.71577	20.9843	6.98638	138.877	36.878	49.282	122.083	15.5794	64.3902
TCGA-31-1951	0.0398869	0.031598	24.0055	10.4392	0.0123519	20.3274	2.41665	7.66643	45.2233	55.0858	22.5464	0.963912	168.649	52.4294	4.47908	0.0278877	38.1896	11.106	75.3568	8.91615	48.9019	112.134	44.1202	12.1847	3.767	19.1573	24.1884	32.6522	0.188411	4.18827	0.911855	0.749143	3.60708	83.1334	3.41869	0.0589247	17.567	0.0924063	17.1435	1.68176	8.21879	22.9092	8.73187	70.0625	17.4875	49.5988	75.5627	13.1474	56.9213
TCGA-24-1928	0.0960166	0.0199088	71.3808	6.2016	0.00819503	27.3533	1.40001	2.79004	24.4078	92.6771	26.2437	0.796262	150.072	69.3786	8.05141	0.0650468	101.706	11.4096	76.3498	5.09906	159.942	88.2013	24.1705	19.0001	3.19094	13.769	21.433	66.3931	0.374456	3.99635	0.931052	1.54254	3.80453	115.617	2.36783	0.0526744	17.1493	0.153918	10.7052	1.39906	21.3613	44.1394	7.28267	63.2131	17.7864	59.3879	45.9343	14.7017	85.9109
TCGA-24-0979	0.300388	0.0759263	121.766	8.60102	0.0146812	32.1497	5.26329	3.04905	23.2389	155.326	25.5168	0.861772	150.294	107.559	8.46685	0.0742612	102.755	16.8233	103.902	3.41791	137.79	117.939	61.8538	30.3961	9.49454	19.2241	27.1096	63.039	0.463077	6.74797	0.840953	3.12288	3.68254	303.562	15.7082	0.0544118	22.3326	0.23954	8.03183	1.18565	42.624	59.4764	10.7887	65.6665	29.9992	64.4123	91.9949	20.7636	99.7286
TCGA-20-1687	0.191378	0.0608548	107.866	20.6477	0.0114522	12.2793	2.94429	3.20983	31.917	129.599	30.1428	0.958061	111.312	73.6917	5.38661	0.0977232	113.175	13.9658	92.0425	7.72113	74.5982	104.748	58.0036	22.3314	7.92652	18.1301	12.9738	78.7025	0.275632	2.54938	0.80294	2.98206	3.90259	277.027	10.3213	0.146531	21.2512	0.187487	7.34324	2.48749	28.7678	54.9715	5.095	88.98	44.8213	48.6711	100.429	8.77244	156.756
TCGA-13-0799	0.0111103	0.00400004	2.85024	0.200532	0.00259259	15.4789	14.7277	3.02643	13.393	14.0509	19.6862	0.595841	374.052	161.124	5.85221	0.0460039	36.0265	23.4111	184.468	2.24941	41.5758	45.8737	41.4684	21.6577	1.39143	18.8431	30.1628	6.94944	0.0841558	4.656	0.979521	1.23855	2.66898	24.5995	16.4702	0.00757712	9.1693	0.0227185	7.67457	0.523712	1.43895	7.42865	6.70526	12.5664	10.8634	54.6058	54.3789	8.66317	16.8355
TCGA-24-1469	0.09659	0.0142517	24.1254	5.10626	0.012423	40.8161	1.966	2.73254	44.6513	60.1009	20.2784	0.971685	290.679	85.9426	7.11709	0.0593091	106.489	14.5468	107.856	4.78334	284.615	98.2247	40.0873	16.8957	7.22553	16.868	19.1036	63.7624	0.264469	4.48553	0.908877	4.69143	3.96243	177.907	8.39545	0.0662465	32.9102	0.246183	16.2165	0.866671	10.4315	66.2554	9.93707	59.2572	11.7405	57.8436	60.1716	23.1191	62.8852
TCGA-OY-A56Q	0.186984	0.00899426	64.7666	2.39718	0.00799422	15.4901	4.23775	2.33669	34.6192	55.5419	19.0653	1.23152	129.402	111.695	4.76074	0.0443794	48.9117	11.6994	66.2284	2.93999	96.9848	55.5337	29.0713	12.6266	1.6529	10.4658	10.0969	23.0095	0.0911617	3.12618	0.950246	1.07255	2.77803	337.358	15.4211	0.0189366	15.6316	0.0719123	7.56493	0.250326	16.8269	57.6785	7.09288	40.1625	9.90087	78.6631	45.4643	8.55281	52.3682
TCGA-30-1866	0.299444	0.0563289	59.7653	27.3538	0.0250299	45.5466	8.33797	4.69558	37.1756	196.867	33.4035	1.25218	234.685	133.094	8.075	0.0777282	271.578	20.4682	168.258	9.45966	461.856	136.438	135.006	44.316	18.0223	21.2011	54.7863	78.2109	0.536657	11.1158	0.696439	3.3318	4.30808	227.37	5.30159	0.550589	43.4003	0.164542	19.6862	1.34854	45.8259	125.163	20.0612	96.6972	22.52	63.6498	119.015	14.2822	133.16
TCGA-13-0768	0.086596	0.00617098	16.8834	4.80871	0.00331509	40.0338	1.47703	2.48376	14.4765	34.798	15.4656	0.250463	64.4936	41.7148	8.39807	0.0105008	54.9277	9.26797	95.8087	6.59403	27.4735	62.2188	13.5804	15.1664	1.40665	18.3521	14.4079	37.4354	0.178515	4.07602	0.595514	1.48733	3.90888	30.4992	2.36184	0.0300505	13.6259	0.0819407	12.5776	4.07915	13.2053	24.5801	5.59269	74.4036	17.3094	33.7482	28.9988	20.1339	38.5114
TCGA-25-2409	0.0838336	0.0287666	34.8537	6.20409	0.0115674	17.2172	7.33934	4.52682	42.4635	85.6193	24.9864	0.919775	170.578	92.6164	4.12449	0.0588227	58.8163	17.7284	93.8083	7.95672	91.2668	96.5699	79.1531	21.1494	8.53037	24.0285	29.0491	32.2712	0.370069	5.48297	0.887966	0.867856	4.6775	117.552	4.52103	0.114361	21.4876	0.194127	13.033	2.22018	11.3759	42.2328	7.1357	81.8165	25.3774	44.7484	79.2403	10.7945	102.529
TCGA-24-2020	0.637755	0.184287	20.3339	26.4267	0.0383604	32.2503	1.0423	2.56282	26.2186	147.805	23.2765	5.52325	353.195	88.8691	15.8824	0.11669	152.65	12.8637	69.519	38.6555	293.003	315.174	20.5332	20.59	31.1125	20.7764	16.0723	203.32	0.307383	3.78219	0.990561	3.38531	13.1563	306.335	15.446	0.194349	37.8505	0.13705	7.80752	1.03935	38.9289	34.3925	7.73707	175.926	19.1446	41.2937	169.412	27.8529	238.17
TCGA-24-1103	0.0916476	0.230276	45.0624	20.6962	0.0353832	19.9097	2.5468	5.03907	48.6838	186.861	32.8089	3.99304	269.998	117.938	4.96926	0.210472	180.059	16.3067	101.331	28.1778	171.124	214.095	161.559	27.9081	25.847	19.4215	24.8467	70.2417	0.359409	5.35321	0.907141	5.2153	9.03559	356.472	18.7982	0.343241	57.5706	0.162084	19.7639	1.4817	20.6137	97.2176	18.6292	92.7197	30.0763	60.5698	173.192	13.314	179.473
TCGA-20-1686	0.361643	0.021878	82.4888	2.05708	0.011392	7.36289	0.403135	2.21455	5.23737	143.344	19.7795	7.81751	123.219	56.1054	0.10708	0.0406046	56.0201	9.08806	74.7547	15.7541	66.3754	44.8997	65.9218	17.7563	67.2837	10.4549	0.859241	14.7095	0.136817	0.668933	0.581986	3.20565	9.16044	139.156	2.75011	0.0212065	34.886	0.0490832	5.50292	0.381526	80.1473	75.3043	29.1454	48.2495	14.129	28.0983	35.156	4.40395	56.4675
TCGA-29-1781	NA	1.66565	4522.53	113.999	0.505226	494.4	286.67	1850.38	25.971	148.251	68.8917	3.38872	74.6265	285.452	780.007	8.5115	13201.8	55.9637	77.829	6.00437	3662.28	131.241	173.635	85.2062	21717.9	39.4292	535.388	2632.84	0.127052	29.1586	0.441204	73.4934	1.37996	262138	584.643	0.324243	423.9	1.15763	11.4027	19.3913	1.2794e+06	13320.5	129.768	280.826	33.3037	7.6857	137125	61.3463	10197.8
TCGA-13-1482	0.107501	0.0923272	80.3229	4.33994	0.014385	23.3135	1.68188	3.14845	17.9034	97.5775	20.6346	0.320296	155.329	109.04	4.81782	0.0893586	104.441	14.8531	100.848	3.15219	65.3561	76.1675	54.7165	19.2293	5.15203	11.7959	13.5289	94.6943	0.197767	3.55779	0.884841	1.33157	3.97206	158.321	6.04748	0.230437	15.3096	0.115132	9.27455	1.36646	18.5107	45.9313	8.57364	71.7367	14.7962	54.366	33.6352	13.3029	67.5701
TCGA-13-0906	0.123478	0.0272208	28.9411	6.93301	0.0158581	17.907	5.67244	4.59652	69.7147	74.3237	29.1204	1.01077	340.508	99.5069	3.87434	0.0651422	143.871	15.4964	120.287	8.19038	344.231	166.948	89.1691	21.659	6.5358	17.9191	38.1785	63.6946	0.534403	6.75168	1.04028	1.02702	5.72248	215.995	4.68164	0.0885817	32.2231	0.19223	22.9418	0.678006	13.6758	61.8292	6.24706	89.1418	15.581	54.1653	87.9302	9.15216	76.4453
TCGA-10-0926	0.0267208	0.0150646	9.36833	3.19788	0.00661559	42.8319	24.6386	3.77966	53.892	71.7127	25.9777	0.656431	379.738	140.756	7.46028	0.0360091	39.6034	20.0066	120.837	3.32054	103.028	54.1514	101.386	37.8934	1.12665	23.3589	28.5403	10.3322	0.122597	4.11175	0.760931	0.898119	1.09635	35.2921	5.76314	0.040356	15.2149	0.1432	15.1716	1.41932	5.07002	12.2875	8.36172	55.6189	16.7756	85.2866	181.872	15.713	49.5635
TCGA-13-0886	0.0864975	0.027652	19.5307	6.89179	0.0096423	30.4465	2.00926	6.39232	31.117	98.4904	22.2969	0.853587	124.865	61.0812	6.17462	0.044846	69.2482	11.6351	109.557	7.59125	67.9168	122.632	64.5148	19.2963	5.27905	14.5296	17.9744	38.5988	0.224766	3.97342	0.726552	1.68181	3.6216	82.0862	1.54359	0.0810201	17.4443	0.1338	15.8594	2.11117	11.3748	45.6319	8.66314	115.613	16.2973	39.9071	81.4473	15.5508	57.7683
TCGA-24-1849	0.0609686	0.014456	13.3056	6.88268	0.00874293	21.059	12.957	4.7256	42.2573	48.5521	21.841	0.466171	104.89	44.3494	5.94358	0.012786	68.3876	7.69622	79.2649	10.7153	37.5344	118.646	24.3112	12.5911	3.89152	14.3069	17.3256	24.2475	0.103799	2.29796	0.699919	0.563232	3.63218	34.4181	1.00506	0.0842541	15.3105	0.104254	18.4728	2.94844	12.4675	28.7215	3.74121	88.8746	20.0619	32.478	72.6585	12.1632	64.87
TCGA-23-1107	0.0464667	0.0125302	2.33636	9.31484	0.00665685	33.1524	17.435	6.47489	63.3278	151.856	22.4365	0.846852	294.311	80.6929	5.69729	0.0297378	179.709	14.6667	165.633	11.0888	223.17	116.157	110.849	27.1459	6.33042	19.9151	12.5939	24.8175	0.107604	1.37558	0.617423	1.75362	3.60368	9.12293	0.653192	0.019868	17.9776	0.163442	33.3945	1.55961	5.59147	18.9307	9.09099	221.163	16.6417	45.2223	187.944	26.8032	61.872
TCGA-61-1911	0.10272	0.016422	10.9207	5.44675	0.00909695	18.0774	27.2324	9.59081	34.7841	89.6563	24.6163	0.56994	85.8506	43.1668	4.06643	0.0249046	142.373	11.8442	78.0221	7.90122	124.173	109.729	61.9446	19.319	11.0519	22.24	12.8879	34.2224	0.131524	2.87156	0.63168	0.506887	4.6803	22.0341	2.37714	0.0304086	20.6608	0.0418666	23.0252	3.96292	13.2334	35.4039	11.0776	102.328	25.6544	39.1083	57.0184	10.6232	55.707
TCGA-24-1560	0.0505766	0.0135268	40.6774	6.24842	0.0130691	29.9956	12.5675	6.66924	44.0681	114.803	25.9444	3.1214	240.201	101.92	6.49885	0.11245	124.781	15.4253	123.355	7.71074	122.354	128.89	62.0557	26.2574	9.39407	10.6647	40.8589	52.923	0.275636	7.28663	0.911846	1.44671	3.77091	170.031	17.812	0.124096	37.2011	0.125707	17.5709	0.673243	9.17094	67.4509	8.96703	55.976	16.5116	61.9454	159.899	12.545	71.5186
TCGA-24-2271	0.0585521	0.0504964	22.9323	7.09996	0.0152288	21.2978	1.34347	2.12037	32.2574	60.714	29.7893	1.14637	160.638	124.96	6.5232	0.0628886	95.0096	20.2296	86.8505	9.56027	26.3709	128.299	32.0769	21.019	9.32069	25.9533	22.2617	46.4042	0.327107	4.73958	0.967069	1.62091	4.84517	230.765	10.657	0.165413	18.5664	0.0996093	7.94523	2.94027	8.4895	52.8473	6.44823	106.787	47.4168	56.1887	38.5036	13.7231	80.2806
TCGA-25-1322	0.221206	0.209656	75.6375	15.6068	0.0382641	30.0803	1.19906	3.81847	50.8025	127.355	29.0287	1.84492	238.787	72.4306	8.25906	0.095511	121.545	15.3673	89.1855	16.8569	437.141	433.045	57.529	17.4601	17.9385	20.2534	41.616	135.32	0.627252	8.01649	1.12471	1.88443	9.16195	716.248	9.668	0.374942	40.5748	0.276543	22.6648	1.87072	29.7507	107.918	8.89735	91.4069	29.2702	74.007	149.731	14.8673	152.159
TCGA-61-2092	0.00665757	0.00241498	1.66501	0.0162777	0.00133508	1.92115	10.1296	0.960864	4.1925	18.1847	12.0685	0.781954	106.268	57.0539	0.504029	0.0198195	14.4147	11.0319	110.379	1.87861	0.840301	28.1312	10.6532	24.3619	0.730122	9.81916	1.32847	1.082	0.0181301	0.397348	0.709503	0.193994	2.24814	2.26729	3.46823	0.00456422	5.49606	0.0172362	2.08068	0.567618	1.28475	1.1596	2.86755	22.8861	12.3321	26.8044	39.4088	2.8197	13.0261
TCGA-24-1424	0.0859829	0.00980755	16.3969	2.29659	0.00810632	24.5436	2.50282	2.37802	40.1084	43.0696	28.5047	0.705851	260.652	119.399	6.62839	0.032997	45.1154	15.616	90.3307	2.88103	133.59	110.383	37.7755	13.7327	4.20151	17.0122	18.0788	47.6669	0.193083	4.8484	0.951615	2.08942	2.71018	165.328	5.01	0.0355459	16.2939	0.130826	10.3276	0.648746	8.89402	53.6972	8.13422	67.6871	12.5255	64.6974	85.9881	9.5441	62.8534
TCGA-5X-AA5U	0.0275365	0.0019085	5.35336	0.712495	0.00314654	14.9605	0.976992	1.80146	42.8779	13.2007	19.1302	0.871986	167.851	139.427	4.33014	0.0164732	22.4595	14.7232	78.8435	1.7688	10.3118	72.5142	12.7818	9.89559	1.23074	11.3076	9.15036	14.5365	0.0702311	2.28959	0.984648	1.13328	2.78368	72.202	9.25187	0.00556477	16.884	0.0742378	8.28687	0.165381	3.90276	9.64503	4.26006	45.8189	6.78277	70.6879	45.6267	8.70376	28.8555
TCGA-23-1021	0.18229	0.0429055	86.5488	5.70166	0.00656588	35.9399	1.87125	1.43442	17.0425	185.484	27.7912	0.440694	172.536	131.215	5.20638	0.1195	146.057	22.2374	139.097	5.05033	46.9637	63.669	93.8165	48.8289	5.57206	18.9382	9.65549	40.6264	0.335243	2.2007	0.849673	1.09036	7.92981	218.062	3.83383	0.13059	22.2681	0.158054	10.9093	1.95852	16.0261	54.8959	5.25981	149.823	29.889	49.1089	33.7242	18.6546	114.961
TCGA-13-1487	0.0489575	0.0194588	17.9597	3.53675	0.00905057	31.5676	14.9966	3.75442	57.4153	94.7334	26.8799	0.884503	170.81	143.994	6.13588	0.0258998	147.135	14.9954	116.883	7.4604	71.4569	120.952	104.306	30.8589	6.70703	17.3271	19.2468	25.7488	0.100058	3.46381	0.782821	1.84608	3.86573	123.948	3.35423	0.0353891	27.773	0.104006	19.5066	0.688775	7.46661	35.0959	10.3895	159.968	23.9924	72.3533	97.0964	20.2118	48.2093
TCGA-23-1023	0.0343625	0.0147389	8.57001	3.04367	0.00685547	17.234	5.5202	4.86982	24.7061	28.2916	28.9042	1.26689	176.228	73.4871	4.30419	0.0352652	26.4248	14.7994	89.8435	7.54767	12.7333	60.1144	31.1264	18.5403	2.75105	28.0108	8.54773	12.626	0.0690146	2.0102	0.745549	1.87373	2.52181	31.2481	4.19545	0.0504757	14.2204	0.0388185	7.27987	4.17256	3.96832	20.2276	9.31861	48.4261	38.4433	34.8021	63.7482	10.3252	32.9331
TCGA-13-1510	0.039051	0.0111696	8.28846	0.885266	0.00445616	14.3711	17.2414	4.63671	15.7351	38.8222	13.0055	0.488922	115.29	53.3259	3.19485	0.0339536	27.1706	9.96156	90.8228	2.74231	58.8124	54.5782	51.0374	15.5952	2.14498	12.1941	9.73121	11.7759	0.0755495	2.39687	0.695232	0.697782	2.12424	23.9606	2.70856	0.0139686	9.27796	0.0572081	10.3673	0.970356	4.20384	11.3794	7.92565	34.1264	7.39861	44.528	42.8916	10.0569	19.6713
TCGA-61-2109	0.0425434	0.0196577	29.6483	2.56287	0.00667355	27.1562	4.94962	4.09599	30.2633	47.7621	25.2556	1.27961	244.89	88.8828	5.61722	0.0632789	51.5178	16.2245	117.325	7.20974	237.962	124.632	66.3236	18.5313	6.95928	17.0533	20.0114	43.9436	0.209849	5.86027	1.12434	1.01344	5.32758	214.194	6.29292	0.0302144	21.5068	0.173167	16.7295	1.12988	6.62708	48.1687	6.93444	48.2915	21.8503	53.8704	118.58	12.9294	71.2101
TCGA-59-2354	0.0592737	0.0198357	23.7423	4.42905	0.015437	25.1028	22.3725	6.40166	42.0262	54.8381	35.7754	1.77407	149.08	75.8324	6.76288	0.034512	81.4891	12.2544	81.4969	10.6753	38.254	131.16	44.4975	26.4338	7.39621	20.1716	42.7836	22.5437	0.165035	7.70962	0.907449	1.48398	3.6747	121.786	4.12958	0.0780116	33.818	0.100129	18.1822	1.86508	12.5389	34.5689	6.63415	72.1831	48.772	62.6867	137.964	16.2322	53.3352
TCGA-31-1956	0.0604875	0.0189019	5.05159	2.06139	0.0064495	19.9675	13.6364	8.56781	25.1121	35.3929	18.4255	0.457946	60.2171	25.15	7.49066	0.0255026	72.6397	6.65026	56.9823	6.19448	41.5423	102.644	27.7781	13.7695	5.75588	19.2774	17.2815	31.9778	0.15508	3.04503	0.506009	0.918311	2.58796	34.6827	2.015	0.0381716	21.2459	0.115684	12.7473	6.62864	10.082	23.2197	5.83801	90.5058	12.9814	25.4307	108.767	8.82882	54.9423
TCGA-04-1519	0.0735006	0.0598196	33.9644	2.59844	0.0166945	32.9422	4.75637	3.38144	43.3262	79.709	25.6233	1.13409	294.236	207.674	5.45517	0.0785013	60.3072	24.984	102.028	8.1244	89.263	88.5707	54.109	35.6458	10.1085	26.1533	19.4472	35.9168	0.19031	3.9963	1.0493	2.39881	3.90338	373.427	8.98995	0.168945	43.6137	0.109797	9.53288	1.97993	9.02666	66.1805	6.73803	71.8248	20.5782	92.6102	52.961	15.6648	68.1209
TCGA-23-1028	0.0529332	0.0155043	9.43387	6.015	0.00560914	22.6806	22.3516	3.87095	29.0292	80.8135	20.2861	0.523124	168.196	71.2734	4.86054	0.026604	70.1587	11.3122	125.704	6.51505	151.234	63.8422	101.849	22.8781	4.7534	14.5833	16.0526	28.8051	0.106726	3.48339	0.781701	1.52583	2.88072	66.2849	5.60343	0.0218869	13.3718	0.081816	18.3171	0.866087	5.18697	15.9058	10.9634	77.3183	14.9015	54.3778	91.3619	11.5195	50.2405
TCGA-13-1407	0.149093	0.00549088	21.3237	1.33035	0.00343829	19.162	0.427825	0.858857	12.004	76.6707	22.2099	0.240397	219.419	164.112	3.65413	0.018294	47.1283	15.6763	137.352	2.03117	113.711	42.4649	36.718	24.5113	3.35163	12.6626	9.47882	18.2298	0.111608	1.5881	0.80501	2.28096	2.26566	114.849	1.48344	0.0122007	14.3589	0.100311	5.41621	0.233523	9.05935	31.4976	5.0039	44.5318	8.794	69.6639	17.2007	8.94851	55.4586
TCGA-24-1545	0.232297	0.0510465	87.3413	12.803	0.0250113	28.7388	10.5717	10.7945	52.0651	76.942	31.173	2.42776	118.201	55.285	9.87567	0.054122	124.542	10.8086	68.8142	13.1281	95.8376	167.803	38.2337	18.8149	25.8585	14.0771	24.482	63.831	0.145276	5.58436	0.813229	2.65705	3.16078	636.63	6.03757	0.172535	63.8651	0.216605	19.2531	2.80016	47.1595	108.879	6.78545	88.8815	25.1569	42.1301	238.571	10.8818	180.168
TCGA-09-2053	0.038069	0.0102238	13.8223	2.88147	0.00532432	27.9223	3.497	2.61033	40.702	83.5943	20.3436	0.503668	145.977	90.495	7.09747	0.04442	76.8803	12.7286	106.904	4.08025	108.92	74.1317	61.0216	18.7138	4.72666	12.6253	21.2521	21.7676	0.158554	3.66409	0.746752	0.819461	3.42346	77.8463	4.35818	0.0271982	23.8734	0.0889296	11.1725	1.00828	5.29245	34.529	8.77334	132.183	14.3555	45.5579	44.4813	17.5583	49.467
TCGA-13-A5FT	0.109021	0.0207215	28.0134	8.35091	0.0103759	34.5982	1.80115	3.22057	55.5875	68.4121	22.493	2.02391	241.51	140.802	7.95647	0.0840448	151.143	18.3313	113.208	6.13741	117.564	146.83	74.644	24.4474	9.03361	13.8302	52.3702	46.9562	0.732592	13.3988	0.968288	2.88781	4.454	246.292	21.3118	0.0526498	30.8773	0.157556	8.24223	0.485684	13.9899	52.8573	14.8993	99.9276	15.6482	55.413	124.423	17.6201	95.2904
TCGA-13-1411	0.0903758	0.010013	15.3354	2.47146	0.00614107	15.1707	2.70731	2.81194	21.1521	63.0662	20.3969	0.557645	93.7592	39.0754	4.23603	0.0165793	46.9035	7.78615	65.2858	6.33706	22.3925	101.183	29.9985	13.2592	2.46592	12.9303	10.9302	25.2503	0.153691	2.6782	0.713821	0.436951	3.47569	47.8847	0.985354	0.0373831	15.8396	0.110461	10.7254	2.22902	19.7026	32.2539	4.29838	110.53	19.8436	29.4631	82.7033	8.83764	62.5525
TCGA-24-2019	0.0563172	0.0240802	26.9826	3.35362	0.0123325	14.6868	1.26967	2.43621	46.3632	74.5468	16.7609	0.674845	259.9	105.613	2.80663	0.148505	64.3914	17.0199	86.8247	3.13078	131.643	124.881	69.7527	13.2301	6.48807	15.3251	16.3949	81.8936	0.194721	3.5933	0.933117	4.78277	5.54318	136.137	23.2443	0.102401	27.1137	0.156485	9.43117	0.857506	6.92868	32.7025	11.0684	47.9466	12.2049	56.7391	144.943	6.10795	85.662
TCGA-24-2254	0.0695664	0.0115025	15.6957	4.40646	0.0068588	15.6436	4.44746	7.10219	31.3921	32.4153	14.7737	1.16267	115.141	59.8855	4.0763	0.0270145	39.9054	8.63065	68.7238	7.07386	92.9088	99.9911	45.3231	9.83515	2.19197	11.7599	17.7433	73.8058	0.0965804	2.91266	0.864893	0.828129	5.89678	94.3139	3.87175	0.0244177	11.5162	0.093035	14.6022	0.847425	10.3418	30.3705	7.8758	61.9244	10.0524	38.2069	82.8981	8.98539	51.5454
TCGA-13-1481	0.33552	0.0513576	50.7343	9.25444	0.0161439	44.0017	4.07813	3.60715	46.4875	91.328	23.8414	1.78484	160.626	94.1117	10.6208	0.0371277	192.505	13.2448	93.4482	14.7475	110.879	227.18	69.1132	24.3507	14.1705	14.3204	33.5644	61.8768	0.429157	8.23045	0.802446	2.01602	6.24114	279.553	5.11365	0.126105	36.339	0.21254	20.2134	1.23502	42.7157	89.1954	8.08074	154.803	15.3523	47.2108	155.445	19.9692	109.31
TCGA-23-1027	0.0554103	0.0207867	16.3315	5.40875	0.00919061	23.3643	22.7473	5.52187	50.0556	90.4926	35.9156	1.18288	322.602	102.199	5.5474	0.0450591	79.8338	18.0034	150.516	16.687	98.7152	76.6865	94.3676	33.6077	5.37017	25.4953	30.0963	14.8672	0.254665	3.5618	0.817512	0.691773	3.73703	44.0147	1.99319	0.0678061	29.1014	0.1204	19.53	1.8737	10.4322	37.3915	6.30844	80.5925	38.2497	41.1742	141.606	12.8497	88.3063
TCGA-23-1114	0.0910805	0.0127812	31.3475	6.1268	0.00969324	35.7717	2.08482	2.7731	54.4594	46.5531	19.2273	1.12342	176.114	115.528	5.26037	0.030702	92.4346	13.4977	76.5301	4.8927	68.2608	93.6619	30.0147	14.6915	2.98212	12.8461	25.7571	61.9453	0.243361	4.64188	0.927372	1.44316	3.54935	172.082	5.80495	0.0734991	15.6074	0.153652	10.7205	0.663938	12.0528	32.5225	8.62983	79.5771	10.5903	56.8488	94.7698	15.7689	50.7739
TCGA-23-1030	0.0907118	0.0204324	26.1868	3.33771	0.00661188	26.9118	5.59848	2.67183	50.1337	55.9909	22.4037	0.792109	165.89	93.3724	4.74057	0.0285491	49.373	14.8242	129.554	5.10671	106.374	80.9972	63.9005	18.6513	4.20281	16.067	20.6189	18.2972	0.126908	2.81339	0.895975	1.15592	2.36951	162.726	3.88624	0.0532377	31.6842	0.111449	11.1827	0.87002	7.61878	70.6055	5.30484	66.8387	16.2999	51.9528	63.8485	13.6339	43.6787
TCGA-09-2054	0.0369549	0.00489358	4.10716	2.33593	0.00504824	25.3904	3.41052	3.23863	45.0509	15.542	9.95586	1.20219	193.062	90.8761	6.09441	0.028081	27.9953	9.86808	91.5868	4.62015	38.6057	94.058	21.3504	12.0354	1.44129	7.84494	14.7894	29.4599	0.0953647	2.99293	0.856219	4.17948	3.15066	154.631	4.23341	0.0190485	17.7933	0.0468405	11.2785	0.260072	3.82538	18.3858	7.89317	43.1807	2.97475	47.9493	40.2673	11.9655	24.3491
TCGA-25-1313	0.144631	0.102971	25.6948	18.0273	0.0269797	21.5562	10.1334	12.4551	46.6644	90.2547	24.7469	1.86898	132.856	63.6539	6.31967	0.0696906	118.211	11.4722	77.7091	29.5179	110.203	272.286	63.9966	15.6693	15.0027	18.0013	33.7771	77.3534	0.58619	8.89858	0.865511	1.94078	5.523	206.086	6.50047	0.209857	31.8659	0.222336	23.0644	2.91666	20.6044	86.8165	13.945	76.3833	29.091	34.2175	261.928	11.8542	76.2342
TCGA-24-2261	0.0868045	0.025793	35.2326	3.83343	0.00962081	23.6334	1.28685	3.76934	24.1787	76.2545	21.7795	0.872737	127.519	68.1445	5.12058	0.0492737	75.498	10.0569	81.9721	6.79474	102.447	120.798	48.0075	12.763	2.28112	11.6185	11.6423	82.7093	0.391239	3.46088	0.875765	1.88165	5.45089	130.846	2.75532	0.0463211	13.604	0.113915	10.542	0.983226	16.7801	43.5931	8.77619	54.7629	16.6996	43.3329	67.0153	13.797	102.049
TCGA-23-2077	0.243252	0.0173018	44.4942	3.25813	0.00828357	21.3202	4.83219	2.36393	28.8659	76.5014	23.6333	0.416057	140.2	87.0663	7.8044	0.0385173	101.758	14.3752	95.855	5.33465	143.382	96.0494	46.0401	19.3778	11.9274	18.5535	13.8505	38.6337	0.30512	2.98144	0.784106	1.30462	6.32996	71.6665	4.62677	0.0558024	24.8076	0.128455	11.0782	1.62586	24.2726	57.6017	6.14222	73.9084	20.7459	42.7594	72.6715	9.63061	114.894
TCGA-09-2056	0.054212	0.0133565	7.5834	1.94294	0.0073023	28.3103	185.273	6.38139	70.6902	94.4711	22.589	0.902407	196.927	100.488	6.78251	0.0445401	105.185	18.163	130.643	11.4985	19.5011	107.997	191.259	42.9681	6.25381	23.1715	21.9945	8.3383	0.117146	2.6781	0.720399	0.549462	2.755	13.9156	3.83742	0.0576522	27.0503	0.058925	18.5239	1.93937	10.0942	14.23	7.86477	103.865	25.0276	51.2871	132.932	11.9392	79.3274
TCGA-61-2098	0.052046	0.00973057	16.307	1.09056	0.00847457	13.3629	1.93848	2.5795	52.429	37.8155	22.1954	1.78136	206.645	135.164	3.06451	0.0341389	99.7279	15.1386	75.5967	4.92132	19.7935	129.008	23.095	17.2395	2.84352	16.0988	8.42514	31.5437	0.0949548	1.61606	0.976117	1.47193	3.66644	91.5401	7.15819	0.0173014	24.3066	0.0427103	5.88323	0.488237	7.82383	34.3488	4.79097	86.8309	14.6664	64.5634	53.4149	12.3544	46.1353
TCGA-57-1584	0.17692	0.045228	62.6473	14.4279	0.0152068	16.1837	6.86337	9.10907	42.6224	78.8379	23.1437	4.14793	169.667	83.9465	5.14647	0.159943	77.3732	16.4335	84.2178	13.5785	89.9275	122.417	71.4773	17.1128	31.1305	16.2694	18.8643	57.9844	0.36669	5.54123	0.869491	4.87309	5.45894	348.212	47.3648	0.130585	62.9931	0.117182	12.6247	2.62607	25.0946	110.286	10.0213	67.257	37.8251	47.8169	164.85	12.0151	114.739
TCGA-13-0890	0.143524	0.0401403	22.2095	11.5969	0.0135795	39.0476	14.6455	3.33068	56.3608	97.2155	26.1193	1.60312	381.898	66.0485	11.3135	0.0391921	86.2952	14.4833	114.02	38.6674	55.6848	177.769	40.207	23.9859	17.6137	30.1947	15.9451	22.5615	0.178998	3.12334	0.865085	1.49554	7.83381	47.2959	1.18718	0.121612	44.4345	0.122017	22.3159	2.95452	21.0057	36.5292	5.491	155.206	22.0939	41.2362	233.522	19.0792	112.883
TCGA-59-2363	0.0161932	0.011297	7.1895	0.565918	0.00763517	21.1459	5.33708	3.06142	21.4792	33.9346	12.1845	0.73118	445.254	91.4652	4.22164	0.0186838	65.2425	13.7266	113.172	3.51589	68.8149	118.643	41.841	17.453	3.56952	20.306	16.8624	16.5148	0.0930002	3.43142	1.05833	1.01229	3.51604	154.166	2.29532	0.02111	21.281	0.0664758	8.43242	0.433668	2.48754	24.4042	5.51922	92.9642	6.72607	70.1747	90.9125	18.8453	27.5536
TCGA-25-2398	0.105687	0.0112832	20.5222	5.91025	0.00772301	28.0322	4.435	5.36953	41.3514	44.7194	17.2713	1.46134	134.611	41.5347	7.90029	0.0153118	30.1328	7.13459	63.1544	10.7347	63.8332	117.072	30.7459	10.1043	3.01422	14.3992	14.4783	24.5608	0.106175	2.63742	0.752055	2.07378	2.81817	159.706	2.54693	0.0299462	29.9275	0.130539	17.1321	0.68067	12.6756	43.4135	4.11727	81.1341	9.86771	51.9284	89.8099	13.5891	48.7924
TCGA-25-2391	0.0313096	0.0159579	14.9409	8.95757	0.00836325	22.4179	16.888	10.5046	67.3875	80.2208	25.8598	2.16345	230.036	75.4245	5.12068	0.074715	101.979	15.1955	125.367	11.0272	190.274	70.7163	96.574	18.3345	4.14728	13.8482	44.1734	76.9243	0.27354	5.81588	0.850781	1.93413	3.83128	57.7574	14.0798	0.0434586	33.2033	0.0745739	17.0263	1.56118	7.32477	47.8941	11.1368	58.4556	18.913	46.5523	108.838	9.27344	100.78
TCGA-04-1655	0.130766	0.03366	81.5364	3.50239	0.00808193	36.7467	0.973513	1.2522	49.7703	176.799	40.2702	0.391862	216.682	253.891	8.78821	0.0455327	247.976	20.7933	115.797	2.92114	134.485	61.0344	74.5823	39.337	5.89137	13.9161	13.4404	66.4437	0.227932	2.60513	0.823286	1.45581	4.19961	306.942	6.57663	0.0913775	23.2506	0.268277	11.3494	0.820938	14.8306	109.944	7.09116	185.287	30.7694	89.1813	28.7585	18.5122	121.215
TCGA-09-1661	13.4745	2.54413	8738.83	35.945	0.0277532	41.7067	0.0189307	0.575924	31.7503	707.247	32.4682	0.514395	148.976	193.418	9.31684	0.262406	525.961	18.3732	105.443	6.39458	176.431	119.989	69.4066	42.1701	39.5865	11.1561	11.1494	333.191	4.03912	3.08121	0.889053	4.85308	30.4647	6549.71	4.47025	9.6727	36.6246	1.00634	7.61409	1.15219	221.381	866.708	5.99076	1068.65	28.45	57.0275	32.0413	19.9039	839.374
TCGA-24-1416	0.137368	0.104477	148.434	8.79827	0.0157252	25.8354	1.15305	1.57616	24.2243	166.635	27.6388	0.567094	171.32	140.866	3.42527	0.126489	130.862	25.5665	110.223	3.79606	76.8633	87.6291	81.1322	40.3105	7.11648	21.8134	23.5539	56.5231	0.71859	5.34521	0.951027	1.64163	6.46938	256.916	8.48515	0.210963	22.0336	0.324855	6.16947	2.21513	17.9822	43.3727	6.13014	104.138	34.6324	59.3941	40.4541	15.4093	177.016
TCGA-29-1699	0.0446019	0.0144773	10.0459	6.54596	0.0107526	16.164	4.64998	5.89612	44.3149	32.9801	20.5185	1.44885	113.008	59.5332	4.89107	0.0696102	34.9462	13.4712	91.1615	6.08185	120.499	98.4036	46.7353	15.3335	2.34241	21.0619	21.1345	55.7394	0.187558	5.90725	0.813354	1.84362	2.27549	71.0835	5.5145	0.0518155	19.4527	0.0550988	8.15629	2.5886	8.47931	28.4541	10.8487	31.4809	22.6295	37.4212	87.8466	8.75824	34.3908
TCGA-13-1509	0.151963	0.063063	26.4413	14.9299	0.0221151	32.6285	6.86287	4.2707	28.904	159.24	24.6737	1.43636	144.003	85.5596	6.87788	0.0433582	154.297	13.9125	105.981	13.2752	132.523	112.849	93.7746	36.8386	8.69751	16.6341	25.4747	89.1793	0.500289	4.8868	0.727093	2.21935	4.50418	246.732	1.70283	0.194087	29.72	0.186075	15.2439	1.0821	20.353	54.2267	14.5289	145.016	16.8358	59.2174	67.7869	16.9749	103.866
TCGA-04-1357	0.0811054	0.0499177	21.0993	7.0152	0.0171822	28.4187	3.80062	6.2232	41.1408	48.8483	21.386	0.794857	85.0695	48.7462	8.44145	0.0752935	69.2334	10.4911	72.0168	7.35176	48.7456	123.835	74.5319	17.4457	5.66931	17.3768	16.8122	45.9273	0.205658	4.9249	0.663779	1.00931	2.71621	66.8473	10.9669	0.130131	24.0131	0.126588	12.7226	5.12078	11.5678	28.0313	7.90903	70.917	22.0014	31.0376	66.196	12.1832	45.2591
TCGA-24-0966	0.059868	0.0103443	9.67849	11.6868	0.00665961	20.0024	82.1514	6.21527	35.8664	80.0642	12.8167	0.932235	233.74	106.241	4.32288	0.0738649	42.3928	19.4434	149.848	7.15592	72.5806	78.1675	183.709	38.9747	4.14855	17.7229	25.0018	7.10732	0.0893477	6.13255	0.64485	3.0094	2.60412	49.7323	14.0106	0.0172224	36.0986	0.045337	12.8708	1.4957	6.65866	21.5236	7.48825	48.4417	13.2967	44.7	157.293	15.0147	67.2625
TCGA-04-1343	0.065313	0.0109228	24.0543	12.3803	0.00554395	39.437	9.64821	5.72034	26.4898	105.698	22.0774	1.35163	194.542	73.2829	9.36916	0.0236426	87.6498	12.2852	118.802	11.3388	138.421	89.254	62.2753	22.6254	10.5561	17.3079	17.048	41.1403	0.0966151	2.38333	0.672533	2.25363	2.84637	42.7599	2.11442	0.0184112	29.655	0.0912133	13.5591	1.80104	9.02613	34.824	8.78862	57.4103	33.081	55.4303	75.9754	26.4667	90.1939
TCGA-13-1408	0.110785	0.0186914	19.8039	2.72519	0.00879341	23.4906	2.99702	2.52715	27.8075	57.4016	24.8693	0.594747	158.594	88.6542	5.47038	0.0200116	85.0957	11.9491	100.312	6.557	42.9871	121.319	24.8089	20.7103	5.45741	17.1758	17.9204	36.8298	0.200711	2.58255	0.847967	2.1186	5.76325	225.554	0.819794	0.0672904	17.3657	0.137253	12.397	1.07109	11.1457	35.8115	5.51097	135.726	22.4817	50.746	50.2719	16.5646	68.2345
TCGA-13-0766	0.0755097	0.0214048	11.8502	10.6236	0.00649911	53.663	42.4305	13.9347	43.8754	164.99	21.0911	0.475249	412.513	64.5405	18.027	0.0716666	98.0862	12.9381	189.096	7.02632	717.103	103.77	208.388	28.524	10.9948	14.4381	56.8413	53.6178	0.164993	6.51882	0.676324	3.33907	2.47071	67.4528	6.06284	0.0291718	28.5253	0.0597785	31.9618	1.08057	11.0326	41.4506	16.9592	59.3019	12.2782	43.8981	323.905	25.2965	104.399
TCGA-23-1809	0.232283	0.0186587	112.999	16.1156	0.0125384	41.3637	9.31047	6.02741	51.2987	118.811	46.1426	1.31075	327.517	124.628	7.47948	0.0737961	186.3	19.4814	136.109	10.1686	325.072	458.122	24.8495	26.836	15.6734	30.5386	18.5702	135.696	0.223444	3.5261	1.12603	4.18285	11.1231	191.151	1.65255	0.135748	33.0534	0.295984	35.1258	1.26833	58.4324	59.3098	10.9974	48.6857	28.7567	101.215	61.128	19.5764	110.86
TCGA-09-0367	0.193676	0.0483316	34.0599	34.2835	0.00945924	23.2546	80.8204	9.04918	59.2674	139.969	22.6081	1.70669	183.136	80.8727	4.92418	0.0583246	173.564	17.778	149.708	20.3608	394.584	151.465	165.95	34.8709	9.45214	17.9539	18.0458	31.8205	0.186361	3.06882	0.671781	2.68534	3.43597	192.218	4.1335	0.0733654	50.5746	0.0774693	21.7839	2.372	23.645	62.2837	7.6751	112.485	34.585	31.2637	269.464	12.1919	137.713
TCGA-13-0801	0.0356777	0.00854889	1.65614	4.27348	0.00532723	25.5649	9.25668	4.40717	25.6097	105.422	29.5731	0.484271	186.094	60.1079	4.54619	0.0209805	82.719	13.4964	150.703	14.389	265.458	83.0027	49.2663	24.6277	3.82804	28.4293	8.11194	8.00717	0.107631	0.706585	0.605398	0.378246	4.53618	6.39884	0.357475	0.0134098	13.1076	0.114511	16.7996	4.06764	3.05811	18.8997	5.1603	172.393	32.3173	27.4557	160.545	17.2024	50.2875
TCGA-13-1410	0.116364	0.0688264	22.7409	17.0552	0.0224613	19.3536	3.56377	7.39132	44.1905	64.1382	24.9447	1.57313	231.333	60.0297	5.93281	0.0447595	85.6153	11.981	99.1839	12.9199	91.4044	185.394	39.9474	10.9479	22.5033	18.7408	18.8289	87.2456	0.22497	2.89179	0.816309	3.30088	4.03282	63.7363	1.96578	0.119786	35.0607	0.0886003	19.4028	1.90827	17.5019	80.7156	11.1873	79.4145	20.2605	46.2058	59.8706	10.0744	80.5886
TCGA-24-2036	0.125667	0.0537726	76.2832	6.57841	0.0251601	37.1054	2.07684	3.98985	32.2479	63.6183	23.5194	2.29465	282.745	166.163	6.24883	0.170247	127.875	23.513	100.181	12.3513	174.039	198.869	70.114	16.5964	5.87419	15.0072	53.0262	105.177	0.417413	13.3687	1.1046	2.28981	8.85062	216.844	24.1444	0.178557	19.4882	0.17845	15.2546	1.16549	19.9931	44.1153	17.3455	42.4491	16.6672	52.6659	57.0725	15.3846	47.2158
TCGA-25-1627	0.0982309	0.0121911	16.3129	8.9316	0.0102389	27.4596	32.0444	7.10502	54.1426	57.6694	31.0893	2.66753	265.875	95.1636	4.76765	0.0847554	72.0621	14.3964	77.2257	5.86173	89.115	122.525	87.4952	20.5991	9.41544	19.5858	24.1792	44.9378	0.292466	9.11349	0.936153	1.39802	2.47419	110.357	12.9403	0.0485586	36.8657	0.11626	23.8501	1.33416	22.6758	42.3884	12.238	61.8434	20.9721	57.7593	173.701	11.0633	68.9708
TCGA-09-1665	0.0518644	0.012342	11.5677	5.59358	0.0128166	21.5824	17.0565	5.02553	33.8881	95.2596	21.6732	0.914967	123.646	70.2889	3.49924	0.0474282	128.124	11.5821	90.7273	5.32464	157.864	130.697	151.139	19.8198	10.1514	14.3043	36.6043	33.2214	0.481526	7.66608	0.681355	1.82638	2.7978	49.1073	4.15161	0.0782271	13.6306	0.0945178	18.8606	0.751206	7.61526	36.9747	23.6558	74.989	16.1807	42.3426	118.78	7.32861	55.2785
TCGA-23-1026	0.0547931	0.0129198	13.4525	4.61876	0.00655711	27.027	8.65933	3.25411	39.0116	57.4092	24.0265	0.661987	190.17	64.9989	6.35923	0.031264	65.1507	14.638	111.924	6.11127	48.5095	62.7385	56.6166	27.6716	4.3546	26.7589	21.8998	18.4622	0.143509	2.92011	0.788481	1.01035	3.05687	52.0999	3.71732	0.0416672	18.7778	0.154465	13.8658	2.10987	7.76419	32.8345	5.29545	55.436	26.8027	44.2505	70.4323	12.7591	48.6835
TCGA-24-1558	0.378445	0.00754972	18.1533	7.4282	0.00886955	10.812	20.1702	8.61867	23.5578	48.3068	17.3046	1.68224	313.467	76.1794	3.63668	0.0682019	32.1732	13.3943	79.3306	8.18411	105.611	148.571	44.7307	10.8954	18.406	18.2623	11.3225	29.3517	0.257211	4.88235	0.931131	4.62993	4.38173	148.329	2.77627	0.0187126	27.7646	0.146982	12.7365	1.23997	30.5414	31.8294	8.64122	35.0243	8.76646	40.1882	93.2009	5.47147	109.192
TCGA-24-2293	0.0296483	0.010242	13.7288	1.9212	0.00566221	19.6097	2.80238	2.57257	25.4973	35.6319	25.2262	0.759455	105.448	47.1282	4.57816	0.0106738	30.0555	8.20533	73.1557	5.9013	7.60348	92.5936	15.966	15.5616	2.25169	14.4548	16.0903	24.2763	0.119012	2.47965	0.849453	1.09881	3.75735	58.1999	0.664954	0.0310358	18.9316	0.0812788	10.657	2.15332	4.82548	24.3531	4.60029	69.3918	26.4695	51.2532	42.3964	13.553	33.7393
TCGA-20-1685	0.0439543	0.00564835	9.84164	2.68247	0.00565655	21.5659	14.1284	5.39603	23.6833	48.7292	17.9696	0.995408	217.597	81.4385	5.91837	0.0546098	42.7198	12.4682	84.6851	4.41665	47.7398	92.1624	53.0546	21.6136	4.45622	13.1784	22.6778	16.7512	0.227459	6.97644	0.883786	1.52999	2.60361	85.1984	11.8823	0.0121194	19.795	0.0817974	6.83251	0.704605	11.071	17.6676	7.59109	34.6199	15.0154	43.0807	170.364	15.189	42.201
TCGA-24-1471	0.135107	0.0387915	87.7908	3.34878	0.00574968	15.2941	1.21822	1.2359	10.3209	105.785	18.1627	0.632415	61.1567	93.3799	5.33263	0.0530507	155.42	14.9776	125.358	2.31617	77.4712	102.569	37.0993	28.5875	3.75977	7.14188	13.7467	70.006	0.14753	3.40435	0.75395	0.869089	5.36303	296.612	8.48799	0.0497353	11.7959	0.130941	4.09766	0.524673	15.2737	34.2934	5.02471	78.7639	19.514	57.0037	26.9611	11.126	108.124
TCGA-13-0760	0.44181	0.0459642	35.5824	13.0099	0.00641473	9.26133	6.4731	2.27751	17.3953	166.904	21.6936	0.493705	128.271	71.0071	2.69759	0.050114	128.945	15.0912	124.514	7.49278	267.945	108.542	73.2854	25.8383	8.81624	17.6576	10.3244	45.0029	0.331813	1.70689	0.713002	1.53126	5.32636	68.9591	0.874847	0.0692908	16.0949	0.0916602	11.8279	2.53641	37.7148	75.1525	6.21431	89.2988	27.0455	28.13	56.8421	7.34582	155.613
TCGA-24-1565	0.0433882	0.0161088	19.0255	1.0068	0.00681158	19.0975	5.74291	2.67981	28.2665	57.6352	24.4934	1.22506	104.324	111.588	4.13486	0.0955997	63.499	19.6822	90.5382	4.26138	12.1114	85.3464	79.861	28.8793	2.50188	19.1095	14.8449	12.6094	0.12084	3.32034	0.838837	1.63803	3.2855	65.8082	21.6804	0.0365986	19.3635	0.113325	7.12807	2.32959	5.60779	17.0894	5.70562	55.343	31.8699	58.192	75.2698	8.72162	44.4904
TCGA-10-0931	0.0534575	0.0346019	35.0205	24.6172	0.0188184	57.6916	57.1492	4.29699	46.7997	204.769	7.74598	2.47754	405.881	37.4372	12.1063	0.0750591	171.614	10.164	130.927	11.5199	324.128	98.3122	335.184	15.099	10.5089	16.6284	66.36	17.4354	0.783789	10.6464	0.701753	1.1804	2.38718	73.3013	13.8826	0.12267	22.3246	0.147353	15.6934	1.00897	8.85399	39.6342	15.9828	119.963	4.97711	42.0356	235.063	34.1888	84.6968
TCGA-04-1514	0.0595279	0.0138304	24.1509	2.27026	0.00852974	20.7482	8.27701	3.00879	72.1936	48.2381	22.7738	1.37611	265.851	273.887	4.98211	0.0467466	88.8991	20.0719	92.4762	4.2201	102.866	101.103	36.9099	27.2283	2.78647	25.5711	29.3938	34.3542	0.141229	8.82853	1.23243	3.23331	4.93646	294.442	12.7283	0.0325906	26.2204	0.105258	10.3806	0.706993	8.31984	31.1672	11.9113	68.9735	12.326	97.3449	58.6666	13.4811	45.3428
TCGA-23-1032	0.0237209	0.0113487	5.87926	8.80673	0.00561213	56.1019	16.5903	6.09303	66.3083	40.3285	22.3433	3.2439	447.619	90.824	13.5308	0.0937985	41.6673	16.1175	165.707	9.20367	168.783	63.7586	85.0611	26.2734	6.0464	22.6748	44.1385	20.4197	0.114545	5.15323	0.794058	4.96581	2.28232	79.4602	9.16333	0.0261839	31.6741	0.0700664	15.6756	1.3758	2.86554	25.8995	17.0875	40.54	15.2351	46.4494	160.668	26.1626	57.9607
TCGA-59-2350	0.070489	0.0613349	30.9016	11.4965	0.0205891	34.9922	14.0142	9.94493	53.1564	130.796	26.2309	1.17734	273.507	80.1364	5.79365	0.0966229	134.514	16.494	146.989	9.36421	128.406	180.37	89.0961	22.7602	7.23168	15.456	33.8823	85.5056	0.236615	4.64911	0.924919	2.80591	3.84889	83.5682	7.45278	0.120726	52.0872	0.0918341	21.7712	1.28643	15.8605	50.7327	11.4148	71.4199	16.1296	63.2919	125.09	19.4837	118.271
TCGA-36-1574	0.0395573	0.00758854	9.15476	1.68116	0.00562043	36.6565	20.8186	4.46146	35.2131	37.4081	30.45	1.74436	160.075	57.6406	5.17035	0.0365486	43.0175	13.6472	120.96	7.06456	284.284	113.661	78.5266	24.6663	6.0399	18.6825	62.2835	14.6154	0.212056	9.34963	0.849181	0.637789	4.1082	54.1832	7.96694	0.0326767	25.5322	0.110817	22.0145	1.32256	9.1086	35.5415	10.5226	37.0367	24.046	44.9897	117.337	10.3098	48.8792
TCGA-24-1474	0.0273578	0.00339686	4.82219	1.64666	0.00256625	7.76705	2.5509	4.82401	8.94874	25.8594	14.3031	0.522958	145.661	53.5046	3.55165	0.019833	40.3012	10.4751	77.1453	1.61227	135.194	64.6692	12.2456	6.53346	0.25564	8.52532	10.2362	60.8037	0.15248	3.36974	0.769169	1.49782	2.32227	24.3175	15.1252	0.00544997	4.41382	0.0636567	5.9034	0.303296	4.44499	19.8316	7.13275	25.8042	4.3936	53.6691	69.5574	4.61996	37.801
TCGA-36-1578	0.348957	0.0669318	182.61	24.8839	0.0276334	43.2414	15.1582	6.37592	54.0655	150.896	20.0124	2.72566	116.162	78.3177	12.9112	0.062331	190.772	13.0743	103.873	24.5924	412.374	259.278	46.6199	23.3038	11.1007	15.2632	42.7549	169.006	1.72324	15.7356	0.956562	3.16773	6.5293	1198.55	11.8261	0.306864	27.7522	0.436626	20.1653	2.34177	64.4657	102.418	12.2757	94.0374	23.9632	48.9957	129.669	20.7783	145.085
TCGA-25-1871	0.0731245	0.00962969	15.1834	1.99895	0.00699931	27.5788	5.13099	2.88373	44.9774	38.4704	23.2349	1.03324	270.352	262.513	8.65892	0.102054	75.613	18.3957	80.744	4.31387	44.9394	86.8681	20.1109	20.9908	4.42135	20.1388	9.48649	43.1024	0.16565	3.98227	1.0975	4.25902	3.13934	126.551	17.4308	0.0186454	16.6392	0.0997004	11.5088	0.546305	9.82619	27.1787	9.11226	41.0482	11.4225	91.4675	71.4285	15.115	30.0405
TCGA-04-1348	0.0225447	0.00712811	6.12192	1.72037	0.00486654	18.0783	3.37269	4.67235	19.3704	58.4872	14.5344	0.592526	196.292	40.1338	7.08818	0.0472215	41.2556	10.7501	117.443	2.8681	99.2645	76.578	54.0115	12.9799	3.46768	16.3932	20.2811	10.7871	0.204336	4.61497	0.757775	0.57783	3.30719	13.6068	9.5731	0.0152415	13.9438	0.060147	12.0703	1.30614	3.79046	15.8576	5.47242	35.4279	7.86733	48.9854	53.6084	12.6855	33.8975
TCGA-24-1422	0.0789878	0.0131428	29.3504	2.96423	0.00742784	16.7401	3.63329	3.90079	14.0668	75.2456	20.5524	0.743997	87.0371	60.4855	4.19168	0.0199759	58.0674	8.84159	79.0309	4.5635	27.722	151.925	23.2569	16.1473	3.96324	9.79166	11.1612	26.9253	0.127131	2.26043	0.788916	0.81405	3.14017	87.8369	1.29908	0.0350336	15.0779	0.0899501	11.8421	1.31732	12.5644	36.5652	4.85701	80.8486	15.0497	56.7114	41.5867	13.0827	48.016
TCGA-61-1736	0.051506	0.0196995	24.7679	4.64679	0.00926019	21.6374	2.03154	2.5044	19.298	78.5532	24.9358	0.997379	150.948	97.9927	6.29986	0.0462672	65.2549	15.8897	112.847	3.63226	46.1526	137.049	58.7077	21.1981	6.93664	15.5362	29.4595	31.5294	0.164292	5.3196	0.993073	0.728619	5.19374	148.99	14.7622	0.0325665	17.6009	0.133941	5.89465	1.17835	9.5377	26.1893	6.09844	69.5622	26.2438	68.88	95.2746	14.7721	79.8071
TCGA-24-2024	0.146817	0.0283617	27.0288	6.65937	0.0218667	38.9739	49.1944	7.30897	83.2199	83.7764	18.2287	3.58788	182.041	111.797	7.90239	0.0607818	92.1185	13.7376	94.8909	19.4431	114.164	206.025	152.673	22.6148	14.5522	15.6022	39.6303	22.0763	0.156515	6.19419	0.813331	1.41535	3.09792	260.569	14.8193	0.123404	35.5657	0.116771	18.7591	1.27067	16.7861	44.1349	11.4496	102.086	16.3939	49.1732	262.411	20.4114	60.4549
TCGA-24-2035	0.12838	0.0609862	34.2889	5.36275	0.035041	45.027	14.5182	4.24847	43.6487	77.2582	24.4089	1.36574	144.795	65.1261	6.88626	0.0177203	106.046	9.64217	79.7592	21.0963	132.002	169.588	65.5912	23.8825	5.04424	19.9742	23.9007	20.0661	0.225283	4.94026	0.848516	0.456536	3.34865	251.25	2.21469	0.362578	26.1428	0.217672	21.4145	2.44403	18.3879	54.5778	8.51382	129.403	23.1463	51.8722	125.586	19.602	68.288
TCGA-24-1842	0.0258085	0.0134678	10.3606	3.04862	0.00744559	19.0691	16.7517	4.30347	30.2944	73.1927	19.4212	0.528309	145.268	53.8183	5.99601	0.0304627	61.6956	10.1381	102.55	5.13657	65.7314	126.305	38.1287	16.4359	4.25792	12.9634	25.8462	26.7622	0.170675	5.13329	0.821805	0.496569	6.33896	45.2217	2.29287	0.0344868	17.5495	0.0970935	15.2584	1.43669	5.13839	16.556	4.76044	79.0881	16.5734	52.8498	143.632	10.026	65.013
TCGA-30-1861	0.220624	0.0267593	118.231	12.6585	0.0137912	46.9441	22.4251	2.66218	36.8965	69.5756	19.4829	1.97101	162.361	56.7172	12.8354	0.0487003	62.4316	8.73719	65.6409	6.04338	124.068	180.307	70.2334	17.3758	16.355	12.4236	30.6666	61.3324	0.331738	9.36617	0.773209	3.69326	3.94703	209.674	6.79126	0.130211	44.7382	0.191362	13.3149	0.556857	28.9821	86.9848	10.9569	63.314	16.7266	47.5002	113.385	19.6537	129.835
TCGA-13-0720	0.118781	0.04564	64.0928	18.9879	0.0104414	19.8673	2.03711	3.15129	20.9665	102.815	29.2719	1.48644	147.807	108.946	4.55957	0.0746843	116.37	20.3513	111.138	10.5717	124.594	105.5	90.2472	26.4635	6.54862	18.9927	27.9055	97.7919	0.369466	4.50387	0.922941	2.54878	6.02023	193.788	12.5445	0.0897502	19.3233	0.16788	10.0051	2.43395	23.9214	92.4022	10.9617	88.8974	42.4319	52.0707	59.2094	13.019	111.445
TCGA-13-0891	0.16625	0.105901	25.247	22.3591	0.0182896	47.2594	2.74374	5.5785	27.2623	115.795	40.1481	1.86291	316.473	100.697	14.7813	0.0999273	104.604	19.9696	129.259	17.6238	369.23	90.5186	78.2319	31.0695	8.73608	32.1542	20.8246	52.6296	0.310019	4.54046	0.761157	2.35579	5.32609	184.094	4.65653	0.217048	24.2423	0.146834	25.0075	3.33931	17.4845	104.7	12.1859	62.6982	34.4407	51.7812	95.1102	18.0723	91.4906
TCGA-13-0900	0.0612873	0.0111695	13.5835	2.74154	0.00749744	20.1492	4.06358	2.11759	17.9871	67.0558	32.2406	0.414733	173.518	87.4606	4.6348	0.0282144	76.5218	11.7841	98.6158	4.42	47.0516	70.3203	45.9778	27.682	5.75594	16.1387	21.4522	20.1634	0.238135	6.78974	0.849264	1.21532	3.11979	70.0275	1.44331	0.0546843	15.8371	0.131884	13.682	0.743267	8.61813	31.8927	11.5136	76.9936	23.4987	69.9622	64.3944	11.4957	43.1397
TCGA-24-1546	0.0873387	0.0576774	46.0093	15.1335	0.0160564	24.6515	5.14645	5.0389	47.1145	123.922	20.7534	1.61273	146.283	53.0374	5.79355	0.0417725	58.7669	8.91087	67.1446	21.8337	37.5532	158.867	50.2136	17.2533	6.96069	15.0956	14.557	31.5985	0.223162	3.25535	0.815139	1.66632	5.86408	153.48	3.10701	0.158471	24.4648	0.0975719	18.2327	2.14314	20.2422	62.5682	5.99342	109.363	20.8605	43.9221	137.715	14.5087	105.225
TCGA-24-1843	0.0817441	0.00555413	13.4356	1.16333	0.00503827	33.0223	4.14732	2.444	17.761	60.0803	20.8759	0.383893	117.748	77.718	7.22403	0.0254047	68.7646	12.411	100.481	2.60892	102.685	80.661	46.5401	18.5237	3.54833	13.2371	17.0899	23.7832	0.114155	3.45558	0.810148	1.84125	3.25875	32.287	1.93848	0.0174896	14.5124	0.0856409	6.98734	0.983087	9.92781	25.9258	6.60217	49.6947	16.2255	47.7074	50.1727	11.6523	59.1532
TCGA-23-1110	0.0718489	0.0100734	13.4615	4.24627	0.00861376	22.6325	2.77588	2.63949	25.7903	53.9357	22.6065	0.533859	558.073	256.504	7.8636	0.0755928	95.9596	20.6499	117.9	3.99135	145.782	61.9148	28.1905	18.1358	5.9419	21.4192	16.5236	22.5843	0.0932647	3.35737	0.965962	2.82276	4.49065	79.4966	5.35025	0.0240596	18.9902	0.133881	8.66617	0.543162	9.87032	15.3433	8.6841	42.0961	11.6919	68.7534	50.8378	12.3679	62.0092
TCGA-20-1684	0.0664111	0.012923	17.3175	1.3097	0.00594812	17.0908	10.3131	3.6275	37.8283	50.1599	15.692	1.11143	147.662	89.1723	4.84386	0.0658526	45.9314	12.6255	90.9001	2.95758	123.61	111.129	40.5385	15.8455	6.53221	9.97413	29.041	16.0372	0.21494	6.93345	0.888441	1.14886	3.50825	120.745	8.50809	0.0306433	27.6936	0.0787312	13.1892	0.323186	8.1053	40.2534	7.34155	27.3616	8.14625	61.5416	96.6985	8.52761	50.9345
TCGA-10-0933	0.0656703	0.0568886	13.0814	5.58679	0.0191877	45.7429	0.449661	2.19355	26.566	83.8718	56.6269	0.210333	448.158	219.431	8.24738	0.0364088	161.266	20.8111	126.352	3.58444	184.966	87.2628	54.8983	25.654	8.42377	37.2852	22.7958	106.962	0.403691	4.31898	1.0128	2.14651	3.20352	43.5642	2.43538	0.134669	10.8427	0.111879	15.9409	0.687499	8.44703	33.2708	12.5912	98.9501	25.5084	119.203	26.625	19.356	48.8479
TCGA-24-1844	0.185472	0.0168887	56.1461	6.97526	0.00966964	14.3604	6.97182	3.77734	21.7647	58.2935	20.0109	3.24535	147.751	133.701	6.34322	0.141993	108.29	19.2013	89.9302	7.06322	87.4117	140.276	28.664	25.6538	6.37194	18.1311	36.7138	53.0429	0.192087	10.6051	0.874732	7.13567	6.70708	295.254	18.2921	0.0435712	34.1478	0.161602	6.96644	1.35912	20.6185	40.2082	12.4246	31.5735	19.7948	75.8358	68.073	8.66608	99.7933
TCGA-04-1341	0.169367	0.0515406	32.1202	20.8814	0.0245613	78.2558	91.8887	6.96998	110.256	136.451	27.2663	2.24153	338.475	120.234	14.2298	0.176217	115.443	18.2288	127.291	10.6548	224.27	135.545	226.608	42.0818	19.2038	21.8867	29.2852	50.6962	0.252924	5.90726	0.760831	6.51583	3.55348	195.786	8.49134	0.215986	74.8703	0.264125	33.423	1.40652	15.6117	46.6809	16.6715	229.483	25.125	54.3096	269.697	34.32	132.845
TCGA-13-1488	0.0498015	0.0147063	8.54604	1.77487	0.00644091	21.5103	4.47345	3.13234	18.2386	41.4178	13.707	0.466256	144.566	40.7211	4.86144	0.0368787	74.3816	9.39883	103.494	4.04501	98.7175	56.3313	43.1051	14.5434	2.97289	16.6548	14.2719	17.5161	0.134566	3.59397	0.754518	1.65083	2.87574	30.9696	6.007	0.0233545	12.1039	0.0532306	10.994	1.2404	6.18535	15.1379	12.5008	36.7758	11.1212	41.2065	46.4312	10.8274	34.4255
TCGA-61-2009	0.0596142	0.00935329	10.7507	4.14112	0.00498873	33.2111	17.6131	4.20381	28.4669	104.235	24.3727	0.844256	103.429	54.6128	14.1245	0.0489899	104.336	10.0676	78.831	4.70944	47.7747	78.601	51.4293	26.3136	10.924	16.3241	17.2549	25.935	0.105127	3.12021	0.62241	0.868952	4.4436	31.8024	5.14794	0.0212058	25.803	0.0619408	13.9433	1.14527	11.242	30.0888	5.67199	123.315	21.2467	54.3977	109.607	18.025	85.512
TCGA-29-1703	0.0641005	0.0129681	16.6678	4.67553	0.00640969	27.1401	18.6172	4.11789	25.0751	60.1363	21.0039	0.61825	159.375	87.3067	3.86507	0.0260472	85.9511	14.7806	95.2716	4.53901	84.7243	71.9064	33.4563	21.1354	3.26571	24.6625	10.6242	29.6404	0.125325	2.28613	0.813658	1.14173	2.11579	28.6405	3.54321	0.0236634	24.1013	0.0942104	11.1397	0.800436	11.3396	21.4046	5.88293	51.34	15.2257	64.0299	58.5974	16.4007	50.6314
TCGA-13-0724	0.0243394	0.00597223	11.3004	1.16277	0.00334415	16.1002	9.83623	2.18437	18.7526	64.3785	16.4754	0.383492	131.467	94.5598	2.592	0.0213639	85.8569	13.4298	96.237	2.88481	61.5791	53.6096	61.6527	21.0867	2.48318	18.2271	8.81361	17.2721	0.150957	2.17019	0.732512	0.933395	2.72869	23.9163	2.92928	0.0110424	11.1773	0.0768138	10.2472	0.801331	2.46861	19.7683	8.0577	64.9739	15.1965	54.6033	31.4672	11.4497	40.4759
TCGA-29-1691	0.0619594	0.00908659	10.0709	2.41545	0.00784234	26.7934	4.44438	4.16384	25.7709	54.9245	21.8115	1.0893	270.236	85.2218	6.7883	0.0335028	98.2098	13.7956	112.401	5.65309	403.425	209.967	32.6477	16.3726	3.51478	16.8514	20.0966	44.6499	0.203939	6.4873	0.922661	1.62382	7.12079	95.5762	8.06102	0.0356372	17.6417	0.132732	22.3157	0.59216	7.92118	27.7978	8.86125	38.8973	7.96143	54.296	259.14	12.2453	81.5671
TCGA-24-1425	0.052916	0.0191867	30.8486	4.73738	0.00796864	18.8061	2.74935	2.52083	15.4016	52.5084	23.0378	0.6113	102.767	60.5446	5.64001	0.0144949	57.4237	8.57558	75.011	5.03588	11.8834	113.419	22.0084	15.0186	3.17826	13.0134	19.6227	35.2397	0.127343	3.60621	0.840343	0.747452	4.33373	123.442	1.47244	0.0693988	10.0102	0.101836	8.95789	1.39671	13.5607	42.9987	4.3755	82.0538	23.9533	56.3188	60.8166	15.5666	66.8398
TCGA-09-1669	0.0676759	0.0301234	27.577	1.84718	0.011183	36.106	5.50825	2.72565	20.4408	62.1362	21.7087	0.512977	219.144	125.856	8.32634	0.0384615	100.748	13.6999	101.99	5.08547	159.388	88.4132	44.0557	24.2036	4.38998	21.6389	21.7507	60.1128	0.231657	4.20833	0.914684	1.65132	5.47352	418.953	4.26609	0.0569114	14.2332	0.153388	10.7549	0.74741	7.83643	35.9319	7.9413	55.6503	16.6736	69.7871	61.245	17.5042	66.5298
TCGA-04-1332	0.0621995	0.0169976	17.9841	7.68027	0.0140402	55.5339	7.64989	6.05774	30.1583	31.7865	24.3442	3.0307	288.096	89.4325	14.4088	0.0260845	35.8966	13.2923	100.408	17.9247	33.3056	120.663	30.8815	18.4312	6.13802	22.7641	17.2427	50.2952	0.0791845	2.69465	0.792378	2.33342	3.46459	203.736	3.74421	0.111162	30.8137	0.0876279	11.0352	1.76651	9.02016	30.2956	6.69764	57.2699	26.4765	49.1043	106.208	31.1353	52.4711
TCGA-24-2289	0.122923	0.0085072	52.0109	8.99047	0.00826866	12.7516	13.3488	4.06972	23.5884	46.9458	22.8414	1.65926	127.694	52.5876	6.35327	0.0214083	50.2064	10.0746	75.6916	6.73365	81.8757	130.29	36.6518	14.2989	4.41426	11.6959	48.2284	63.599	0.489025	9.19498	0.892726	0.876525	4.59847	203.575	2.83754	0.0621768	23.9086	0.156858	11.4615	1.20117	18.6698	58.6808	4.85982	57.9594	23.5919	37.3214	142.599	10.2887	73.9007
TCGA-24-1426	0.236887	0.312727	302.682	19.7554	0.0236012	47.6349	0.37252	1.62849	34.1376	269.23	28.6334	0.76386	168.406	256.903	7.87087	0.145441	223.282	25.8765	141.32	4.60846	143.426	141.67	72.294	44.7428	24.4152	16.4721	15.8219	156.687	0.835007	3.85502	0.966699	2.853	11.3962	644.655	4.97996	0.641469	42.1695	0.351807	8.62581	0.881248	28.2587	128.281	11.3637	209.16	25.5501	75.0046	24.6619	32.0989	206.841
TCGA-13-1497	0.030615	0.0110267	9.83277	2.56848	0.00343407	28.8158	0.667346	2.07887	12.4731	61.3082	9.88194	0.389096	223.367	38.3225	7.43387	0.0403874	76.4365	8.68148	83.9411	1.75454	48.8622	65.2274	32.8243	11.7665	5.64811	18.1114	11.8154	14.8979	0.216908	2.19708	0.731627	0.973081	3.70204	49.3462	9.51094	0.0143447	11.3335	0.046027	8.66665	0.785586	3.7702	20.7022	7.89722	42.3863	5.08635	54.5337	63.3708	15.2616	38.5378
TCGA-25-1632	0.0714187	0.033233	46.4871	6.02627	0.0203099	32.1605	68.1308	5.56002	112.955	66.5649	27.4017	3.3256	238.873	182.747	6.17825	0.0726532	109.828	20.3795	113.995	10.4118	125.486	172.793	84.798	32.3767	8.18689	19.9806	46.9819	31.2012	0.167457	7.82301	0.996092	1.2606	4.82819	321.604	14.9863	0.0707308	56.3028	0.17164	16.5816	1.17162	12.8318	29.2719	6.9433	85.2301	23.0661	57.0615	200.486	20.1279	77.3756
TCGA-04-1337	0.0745676	0.0282281	76.192	8.60502	0.00915054	29.8027	5.89071	3.80673	51.6841	103.988	27.8096	1.36572	167.738	74.8987	7.54313	0.0261906	71.3839	11.7624	90.5351	10.1599	56.5608	121.911	73.0654	24.9044	8.29669	16.3642	26.5461	27.1124	0.124722	2.68452	0.767621	1.04608	3.98105	86.8044	1.1493	0.0916908	32.3078	0.12864	20.592	1.61332	16.0778	60.3287	4.52319	132.262	27.1061	51.2365	91.4203	19.0208	111.266
TCGA-04-1648	0.49375	0.592233	575.466	13.3658	0.082158	28.845	3.52807	11.4064	65.7863	233.459	1.90604	1.21841	356.953	5.06882	7.77692	0.245908	217.49	2.67747	44.1662	16.5445	477.041	202.809	264.365	2.17365	55.8308	7.93791	20.6728	107.875	1.18871	4.51345	0.681918	1.88333	7.89773	393.296	25.4121	4.88616	46.1886	0.348594	27.3911	1.3797	85.1464	270.898	9.06376	118.254	0.331047	31.1597	490.139	22.9593	156.862
TCGA-61-1919	0.0756352	0.0142625	7.3812	2.10656	0.00573329	13.5998	10.3999	3.62385	20.0801	52.4157	24.7967	0.661642	132.932	49.7905	3.17753	0.0138416	48.1696	9.16725	93.2017	7.41956	34.9405	89.7528	26.9859	19.7889	2.01651	14.5366	10.0507	11.1115	0.0996289	2.03184	0.728546	1.10917	3.20806	37.0946	0.441626	0.02406	16.3793	0.0525831	11.774	1.31731	8.37263	32.1353	6.21459	71.8826	15.4238	43.7233	76.2156	7.71131	48.7606
TCGA-23-1122	0.0622859	0.0252524	25.2253	4.30647	0.0101325	28.5061	2.11278	3.08204	35.0668	53.4622	26.041	0.531912	189.692	81.8047	5.94618	0.0385352	77.4806	12.883	98.6088	4.45105	142.211	78.8364	41.1377	15.9629	2.32397	19.4927	18.5229	49.1032	0.252442	4.08902	0.929166	0.956822	4.68485	101.883	6.61326	0.0538123	14.3562	0.151719	14.5111	0.880436	9.65088	34.774	9.65269	59.6315	14.8729	53.881	46.3336	15.3078	51.5359
TCGA-3P-A9WA	0.0884474	0.0224999	78.7223	8.99431	0.0181073	16.5683	4.17868	3.71232	89.3368	65.3653	20.2974	1.75391	356.115	115.098	2.82705	0.158052	93.2179	16.0413	80.0662	6.3089	608.056	180.026	81.1311	14.9748	27.6001	15.4935	42.8887	62.5843	1.07878	13.1725	1.24097	2.67952	7.41533	251.859	25.2145	0.277108	52.0703	0.210053	28.6217	0.844955	17.9685	95.7971	11.6851	45.6512	20.9641	55.9895	218.357	7.36823	123.57
TCGA-24-1104	0.191844	0.0684038	89.8334	17.6498	0.0152422	34.5101	4.0939	6.20618	26.7304	208.951	23.6165	1.43802	162.132	76.3113	15.4683	0.114728	159.9	15.1635	83.1377	9.71109	359.234	252.816	154.05	19.9913	16.6847	15.2618	25.0488	144.467	0.875307	10.0072	0.809187	1.68914	11.1651	208.569	20.1082	0.127313	21.1717	0.259759	18.0238	3.20449	31.3009	127.758	20.1878	101.429	31.8946	37.2868	181.06	14.7958	192.986
TCGA-13-0924	0.0345477	0.0189998	7.16272	7.68105	0.0114436	32.1501	22.9025	6.06746	50.4217	134.955	34.7045	1.08859	295.061	77.7305	4.72664	0.0334093	117.97	13.0016	141.493	19.8297	234.097	114.195	148.458	24.5923	7.0925	19.5412	19.8401	29.1073	0.133616	3.02158	0.693633	0.96755	3.27891	30.7631	0.977899	0.0557211	18.4556	0.153124	27.2259	2.46275	4.23111	37.8029	11.2376	116.734	32.1775	37.556	135.815	18.149	57.5727
TCGA-13-1496	0.042679	0.0304766	9.86454	5.61306	0.0122508	35.6666	5.38403	5.60908	66.2898	43.922	34.256	0.523353	109.422	60.2045	7.43033	0.0305691	86.67	12.4438	113.329	5.91284	612.955	88.9408	99.6769	19.9387	5.67912	22.888	28.165	94.9242	0.424785	4.83814	0.760736	1.24855	1.66171	36.2144	3.62281	0.128011	11.8256	0.12436	25.5579	2.13902	6.92934	56.9101	12.8216	55.3232	24.9637	41.6059	55.1093	13.6109	33.8106
TCGA-23-1120	0.08627	0.0286607	25.1228	2.96696	0.0108832	16.6832	0.942727	3.78823	24.666	55.2955	35.2176	0.45815	155.916	107.397	5.10229	0.0526514	84.865	17.0186	115.932	4.43434	61.5439	90.5908	25.5269	22.2455	4.6538	22.861	18.5632	60.4947	0.253216	4.17533	0.938697	2.49787	3.84413	85.2728	2.26177	0.0568338	16.1353	0.114849	8.1671	2.48063	10.8235	69.4445	7.87484	67.2363	28.9629	52.5538	30.1737	9.15912	58.0147
[truncated: 149 more columns]
